# Supplementary material
Source: PubMed Central journal article supplement (PMC2896468)
Supplement: 09_165_Mas_Suppl.pdf [file 09_165_Mas_Suppl.pdf]

**Supplemental Figure-1: Top scored network from significant interaction (HCV\* Alcohol) analysis**

Network 1: significant interaction2 - 2009-02-13 10:40 AM: significant interaction2.xls: significant interaction2 - 2009-02-13 10:40 AM

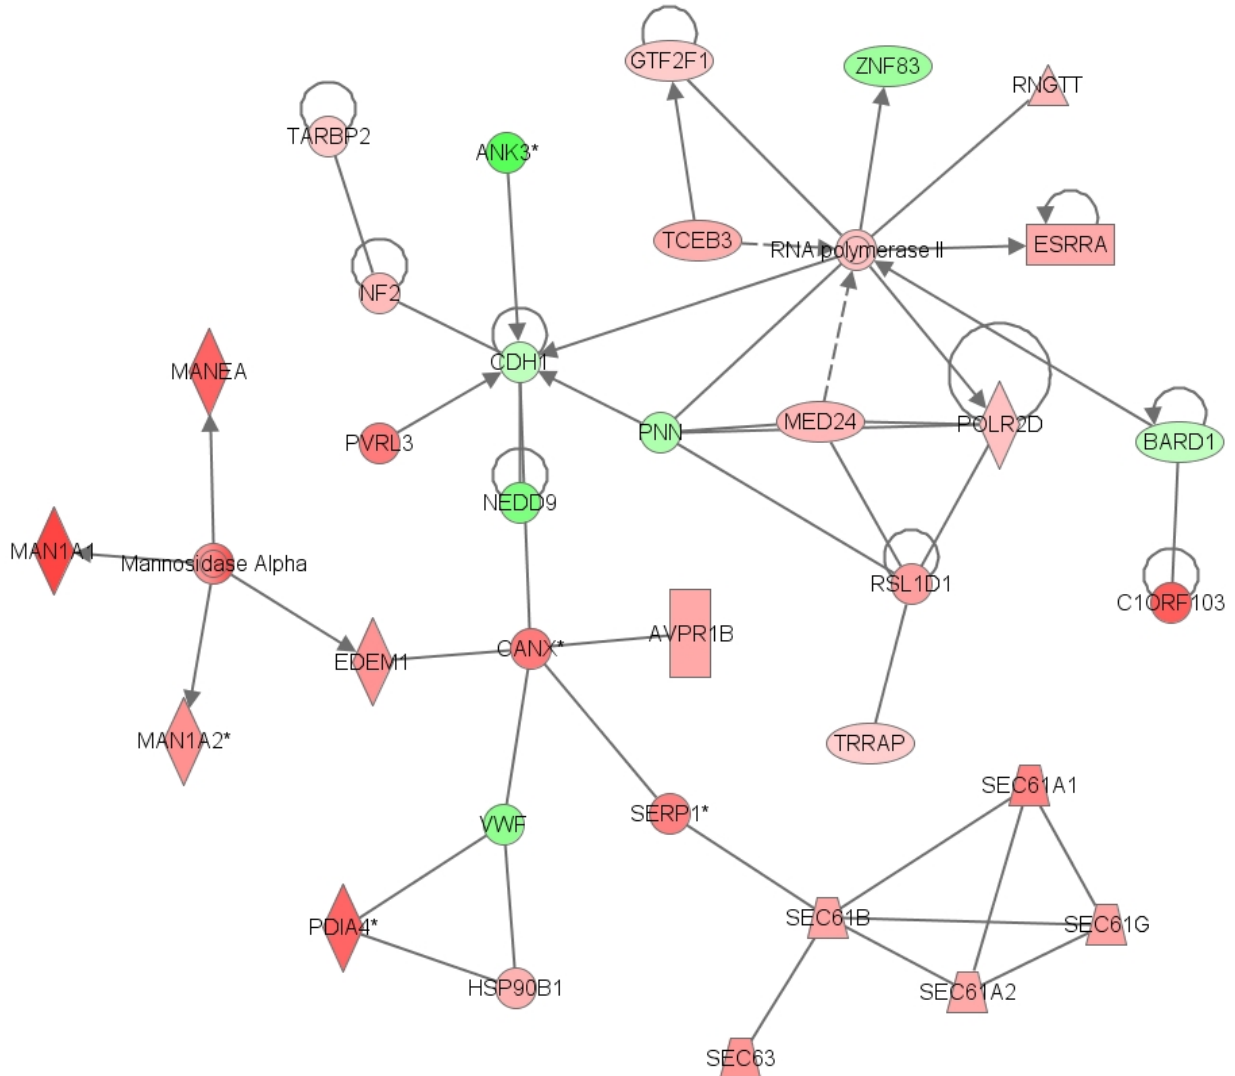

© 2000-2009 Ingenuity Systems, Inc. All rights reserved.

**Supplemental Figure-2.** Second top scored network from significant interaction (HCV\*Alcohol) analysis

Network 2 : significant interaction2 - 2009-02-13 10:40 AM : significant interaction2 .xls : significant interaction2 - 2009-02-13 10:40 AM

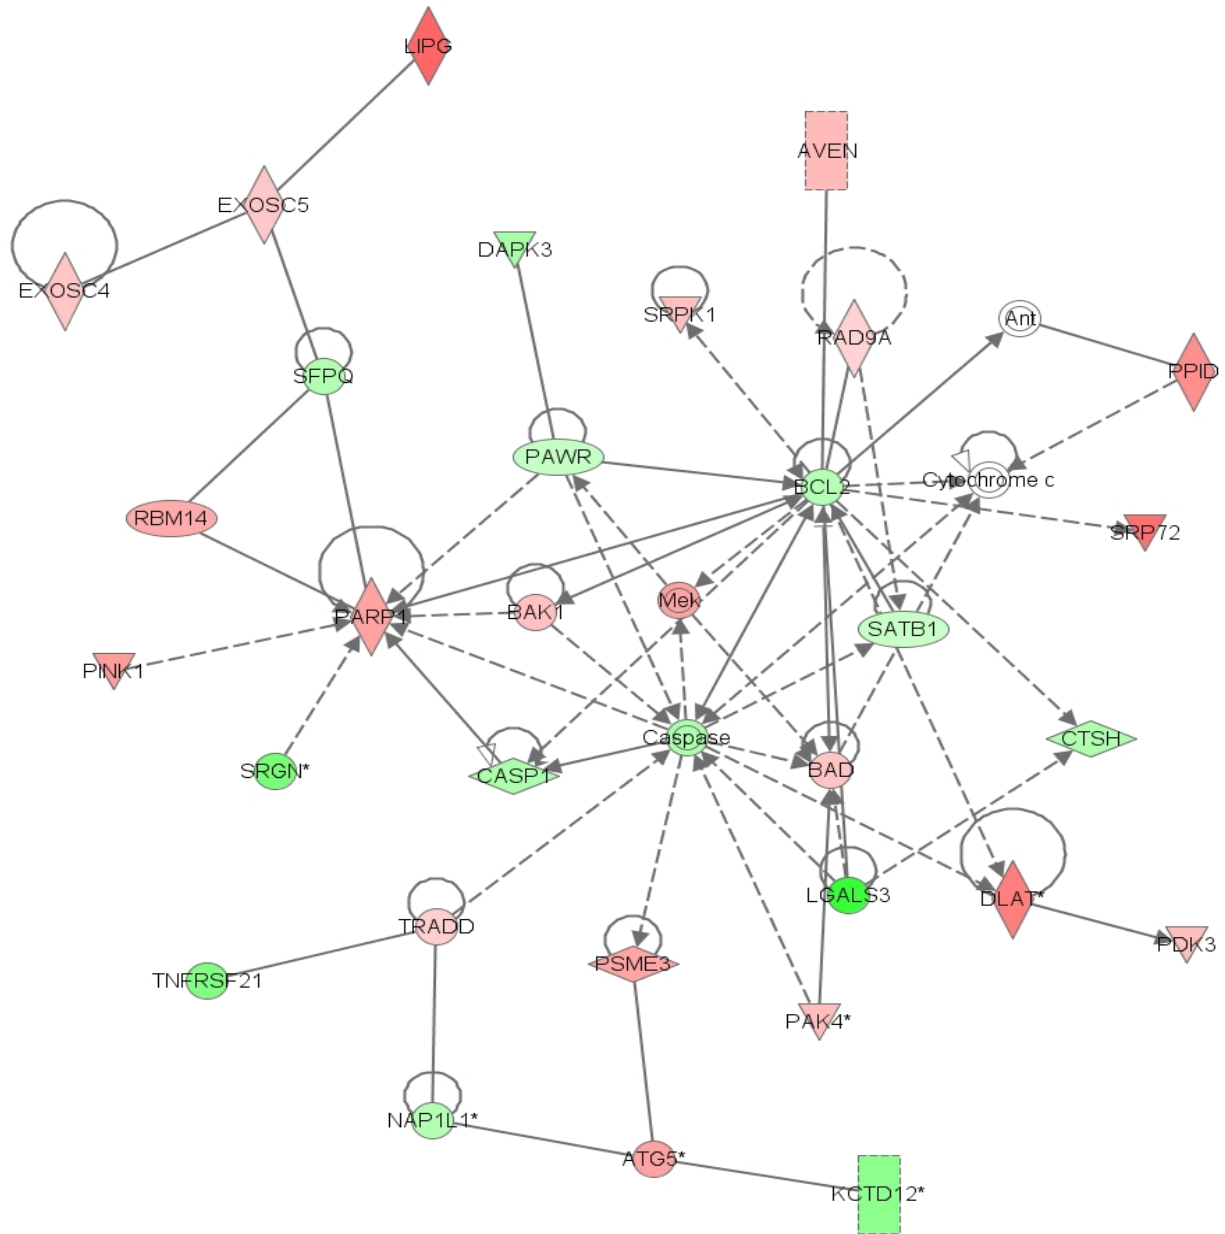

© 2000-2009 Ingenuity Systems, Inc. All rights reserved.

**Supplemental Figure-3.** Top scored network from the analysis of differentially expressed genes between HCV and alcohol cirrhotic tissues

Network 1 : HCV VS. EtOH2 - 2009-12-08 11:33 AM : HCV VS. EtOH2.xls : HCV VS. EtOH2 - 2009-12-08 11:33 AM

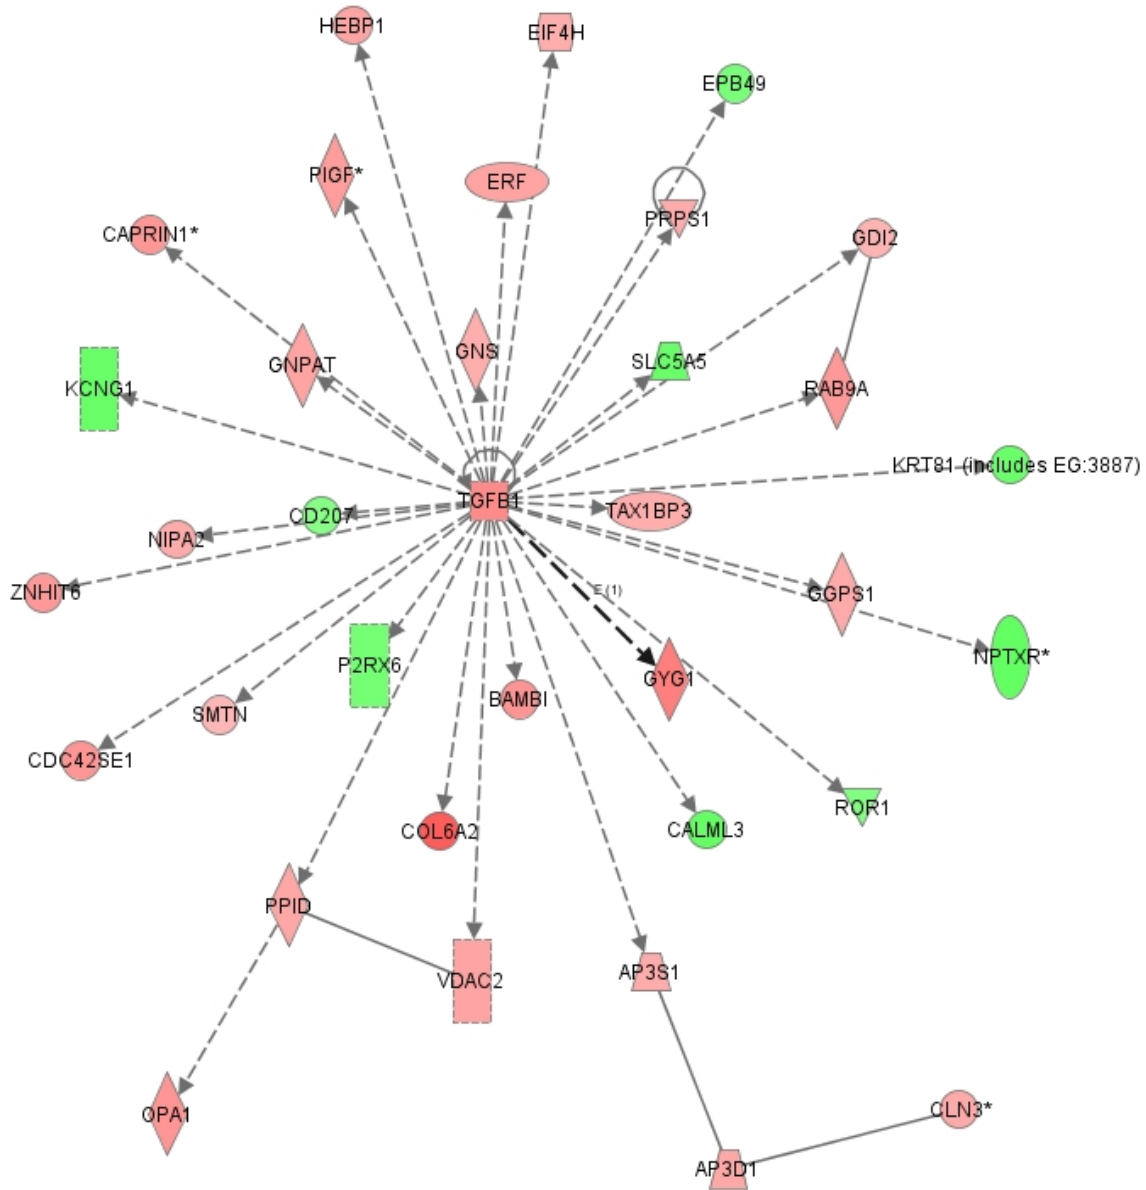

© 2000-2009 Ingenuity Systems, Inc. All rights reserved.

**Supplemental Figure-4.** Second top scored network from the analysis of differentially expressed genes between alcoholic cirrhotic tissues and normal liver tissues.

Network 2 : ETOH v Normal - 2009-02-13 08:45 AM : ETOH v Normal.xls : ETOH v Normal - 2009-02-13 08:45 AM

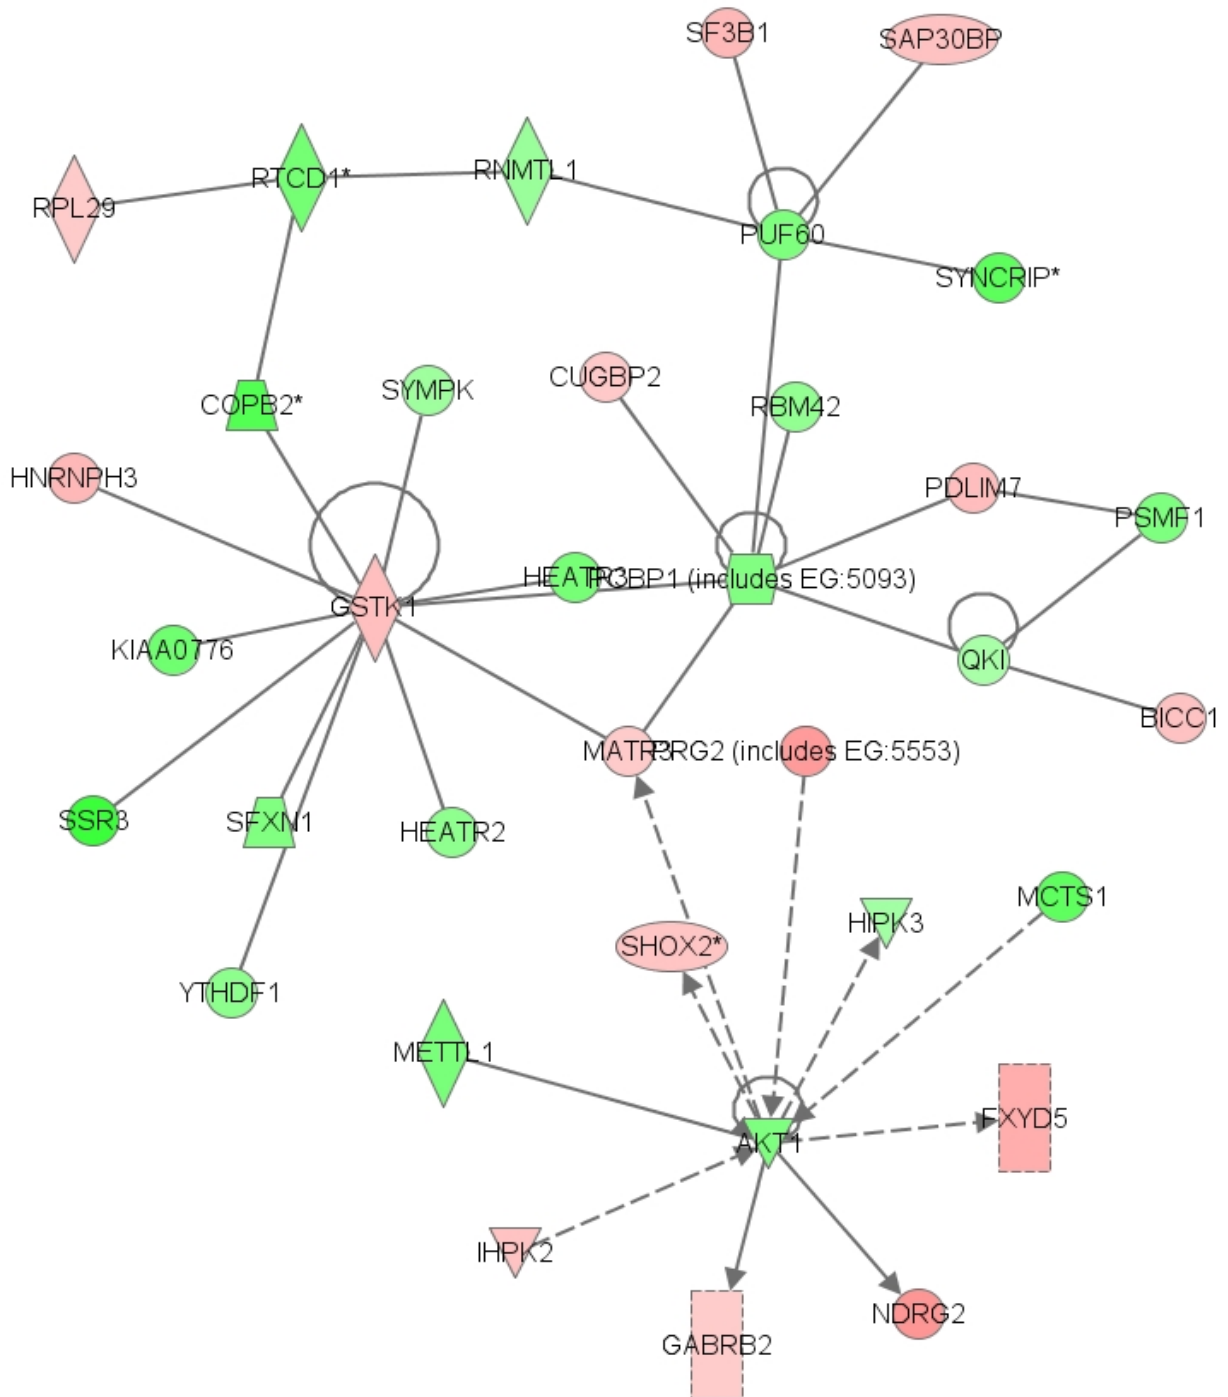

© 2000-2009 Ingenuity Systems, Inc. All rights reserved.

**Supplemental Table 1-** Differentially expressed genes between alcoholic cirrhotic tissues and normal livers

| <b>Affy ID</b> | <b>Symbol</b> | <b>Gene Name</b>                                                   | <b>Fold</b> |
|----------------|---------------|--------------------------------------------------------------------|-------------|
| 1773_at        | FNTB          | farnesyltransferase, CAAX box, beta                                | -<br>1.26   |
| 200039_s_at    | PSMB2         | proteasome (prosome, macropain) subunit, beta type, 2              | -<br>1.81   |
| 200044_at      | SFRS9         | splicing factor, arginine/serine-rich 9                            | -<br>1.49   |
| 200048_s_at    | JTB           | jumping translocation breakpoint                                   | -<br>1.99   |
| 200065_s_at    | ARF1          | ADP-ribosylation factor 1                                          | -<br>1.55   |
| 200078_s_at    | ATP6V0B       | ATPase, H <sup>+</sup> transporting, lysosomal 21kDa, V0 subunit b | -<br>1.72   |
| 200098_s_at    | ANAPC5        | anaphase promoting complex subunit 5                               | -1.6        |

|             |        |                                                                       |      |
|-------------|--------|-----------------------------------------------------------------------|------|
|             |        |                                                                       | -    |
| 200628_s_at | WARS   | tryptophanyl-tRNA synthetase                                          | 1.81 |
|             |        |                                                                       | -    |
| 200646_s_at | NUCB1  | nucleobindin 1                                                        | 2.43 |
|             |        |                                                                       | -    |
| 200650_s_at | LDHA   | lactate dehydrogenase A                                               | 1.67 |
|             |        |                                                                       | -    |
| 200683_s_at | UBE2L3 | ubiquitin-conjugating enzyme E2L<br>3                                 | 2.19 |
|             |        |                                                                       | -    |
| 200684_s_at | UBE2L3 | ubiquitin-conjugating enzyme E2L<br>3                                 | 1.25 |
|             |        |                                                                       | -    |
| 200744_s_at | GNB1   | guanine nucleotide binding protein<br>(G protein), beta polypeptide 1 | 1.89 |
|             |        |                                                                       | -    |
| 200756_x_at | CALU   | calumenin                                                             | 1.59 |
|             |        |                                                                       | -    |
| 200786_at   | PSMB7  | proteasome (prosome, macropain)<br>subunit, beta type, 7              | 1.63 |

|             |        |                                                               |           |
|-------------|--------|---------------------------------------------------------------|-----------|
|             |        |                                                               | -         |
| 200805_at   | LMAN2  | lectin, mannose-binding 2                                     | 1.94      |
|             |        |                                                               |           |
| 200807_s_at | HSPD1  | heat shock 60kDa protein 1<br>(chaperonin)                    | -<br>1.67 |
|             |        |                                                               |           |
| 200812_at   | CCT7   | chaperonin containing TCP1,<br>subunit 7 (eta)                | -<br>1.57 |
|             |        |                                                               |           |
| 200827_at   | PLOD1  | procollagen-lysine 1, 2-oxoglutarate<br>5-dioxygenase 1       | -<br>1.61 |
|             |        |                                                               |           |
| 200830_at   | PSMD2  | proteasome (prosome, macropain)<br>26S subunit, non-ATPase, 2 | -<br>1.58 |
|             |        |                                                               |           |
| 200843_s_at | EPRS   | glutamyl-prolyl-tRNA synthetase                               | -<br>1.71 |
|             |        |                                                               |           |
| 200846_s_at | PPP1CA | protein phosphatase 1, catalytic<br>subunit, alpha isoform    | -<br>1.77 |

|             |        |                                                          |           |
|-------------|--------|----------------------------------------------------------|-----------|
| 200870_at   | STRAP  | serine/threonine kinase receptor associated protein      | -<br>1.92 |
| 200876_s_at | PSMB1  | proteasome (prosome, macropain) subunit, beta type, 1    | -<br>1.65 |
| 200918_s_at | SRPR   | signal recognition particle receptor ('docking protein') | -<br>2.44 |
| 200927_s_at | RAB14  | RAB14, member RAS oncogene family                        | -<br>2.48 |
| 200929_at   | TMED10 | transmembrane emp24-like trafficking protein 10 (yeast)  | -<br>1.76 |
| 200931_s_at | VCL    | vinculin                                                 | 2.15      |
| 200938_s_at | RERE   | arginine-glutamic acid dipeptide (RE) repeats            | 1.81      |
| 200968_s_at | PPIB   | peptidylprolyl isomerase B (cyclophilin B)               | -<br>1.89 |



|             |       |                                                                                                               |           |
|-------------|-------|---------------------------------------------------------------------------------------------------------------|-----------|
| 200987_x_at | PSME3 | proteasome (prosome, macropain)<br>activator subunit 3 (PA28 gamma;<br>Ki)                                    | -<br>2.13 |
| 201004_at   | SSR4  | signal sequence receptor, delta<br>(translocon-associated protein delta)                                      | -<br>1.77 |
| 201013_s_at | PAICS | phosphoribosylaminoimidazole<br>carboxylase,<br>phosphoribosylaminoimidazole<br>succinocarboxamide synthetase | -<br>2.07 |
| 201014_s_at | PAICS | phosphoribosylaminoimidazole<br>carboxylase,<br>phosphoribosylaminoimidazole<br>succinocarboxamide synthetase | -<br>1.86 |

|             |        |                                                                                        |           |
|-------------|--------|----------------------------------------------------------------------------------------|-----------|
|             |        |                                                                                        |           |
| 201017_at   | EIF1AX | eukaryotic translation initiation<br>factor 1A, X-linked                               | -<br>1.97 |
| 201042_at   | TGM2   | transglutaminase 2 (C polypeptide,<br>protein-glutamine-gamma-<br>glutamyltransferase) | -<br>2.97 |
| 201043_s_at | ANP32A | acidic (leucine-rich) nuclear<br>phosphoprotein 32 family, member<br>A                 | -<br>1.48 |
| 201052_s_at | PSMF1  | proteasome (prosome, macropain)<br>inhibitor subunit 1 (PI31)                          | -<br>1.73 |
| 201066_at   | CYC1   | cytochrome c-1                                                                         | -<br>1.89 |

|             |        |                                                                       |      |
|-------------|--------|-----------------------------------------------------------------------|------|
|             |        | proteasome (prosome, macropain)                                       | -    |
| 201068_s_at | PSMC2  | 26S subunit, ATPase, 2                                                | 1.86 |
|             |        |                                                                       | -    |
| 201079_at   | SYNGR2 | synaptogyrin 2                                                        | 1.89 |
|             |        |                                                                       | -    |
| 201097_s_at | ARF4   | ADP-ribosylation factor 4                                             | 1.87 |
|             |        |                                                                       | -    |
| 201098_at   | COPB2  | coatamer protein complex, subunit<br>beta 2 (beta prime)              | 2.31 |
|             |        |                                                                       | -    |
| 201144_s_at | EIF2S1 | eukaryotic translation initiation<br>factor 2, subunit 1 alpha, 35kDa | 1.61 |
|             |        |                                                                       | -    |
| 201145_at   | HAX1   | HCLS1 associated protein X-1                                          | 1.59 |
|             |        |                                                                       | -    |
| 201156_s_at | RAB5C  | RAB5C, member RAS oncogene<br>family                                  | 1.61 |
|             |        |                                                                       | -    |
| 201157_s_at | NMT1   | N-myristoyltransferase 1                                              | -1.7 |

|             |         |                                                                        |           |
|-------------|---------|------------------------------------------------------------------------|-----------|
| 201158_at   | NMT1    | N-myristoyltransferase 1                                               | -<br>1.78 |
| 201175_at   | TXNDC14 | thioredoxin domain containing 14                                       | -<br>1.85 |
| 201198_s_at | PSMD1   | proteasome (prosome, macropain)<br>26S subunit, non-ATPase, 1          | -<br>1.61 |
| 201214_s_at | PPP1R7  | protein phosphatase 1, regulatory<br>(inhibitor) subunit 7             | -<br>1.54 |
| 201229_s_at | ARIH2   | ariadne homolog 2 (Drosophila)                                         | -<br>1.49 |
| 201230_s_at | ARIH2   | ariadne homolog 2 (Drosophila)                                         | -<br>1.43 |
| 201239_s_at | SPCS2   | signal peptidase complex subunit 2<br>homolog ( <i>S. cerevisiae</i> ) | -<br>2.02 |

|             |        |                                                                         |           |
|-------------|--------|-------------------------------------------------------------------------|-----------|
| 201244_s_at | RAF1   | v-raf-1 murine leukemia viral<br>oncogene homolog 1                     | -<br>1.59 |
| 201255_x_at | BAT3   | HLA-B associated transcript 3                                           | -<br>1.42 |
| 201276_at   | RAB5B  | RAB5B, member RAS oncogene<br>family                                    | -<br>1.35 |
| 201281_at   | ADRM1  | adhesion regulating molecule 1                                          | -1.9      |
| 201315_x_at | IFITM2 | interferon induced transmembrane<br>protein 2 (1-8D)                    | -<br>1.78 |
| 201359_at   | COPB1  | coatamer protein complex, subunit<br>beta 1                             | -<br>1.84 |
| 201374_x_at | PPP2CB | protein phosphatase 2 (formerly<br>2A), catalytic subunit, beta isoform | 1.69      |
| 201381_x_at | CACYBP | calcyclin binding protein                                               | -<br>2.02 |

|             |         |                                                                      |           |
|-------------|---------|----------------------------------------------------------------------|-----------|
|             |         | proteasome (prosome, macropain)                                      | -         |
| 201388_at   | PSMD3   | 26S subunit, non-ATPase, 3                                           | 2.05      |
| 201398_s_at | TRAM1   | translocation associated membrane protein 1                          | -1.9      |
| 201413_at   | HSD17B4 | hydroxysteroid (17-beta) dehydrogenase 4                             | -<br>1.78 |
| 201459_at   | RUVBL2  | RuvB-like 2 (E. coli)                                                | -<br>1.52 |
| 201465_s_at | JUN     | jun oncogene                                                         | 2.43      |
| 201474_s_at | ITGA3   | integrin, alpha 3 (antigen CD49C, alpha 3 subunit of VLA-3 receptor) | 1.4       |
| 201475_x_at | MARS    | methionyl-tRNA synthetase                                            | -<br>1.98 |
| 201491_at   | AHSA1   | AHA1, activator of heat shock 90kDa protein ATPase homolog 1 (yeast) | -<br>1.84 |

|             |         |                                                                         |           |
|-------------|---------|-------------------------------------------------------------------------|-----------|
| 201495_x_at | MYH11   | myosin, heavy chain 11, smooth muscle                                   | 1.42      |
| 201500_s_at | PPP1R11 | protein phosphatase 1, regulatory (inhibitor) subunit 11                | -<br>1.47 |
| 201504_s_at | TSN     | translin                                                                | -<br>1.54 |
| 201532_at   | PSMA3   | proteasome (prosome, macropain) subunit, alpha type, 3                  | -<br>2.03 |
| 201537_s_at | DUSP3   | dual specificity phosphatase 3 (vaccinia virus phosphatase VH1-related) | -<br>1.98 |
| 201547_at   | JARID1B | jumonji, AT rich interactive domain 1B                                  | 1.27      |
| 201576_s_at | GLB1    | galactosidase, beta 1                                                   | -<br>1.72 |

|             |        |                                                                        |           |
|-------------|--------|------------------------------------------------------------------------|-----------|
| 201577_at   | NME1   | non-metastatic cells 1, protein<br>(NM23A) expressed in                | -<br>2.53 |
| 201587_s_at | IRAK1  | interleukin-1 receptor-associated<br>kinase 1                          | -<br>2.39 |
| 201588_at   | TXNL1  | thioredoxin-like 1                                                     | -<br>1.59 |
| 201589_at   | SMC1A  | structural maintenance of<br>chromosomes 1A                            | -<br>2.02 |
| 201620_at   | MBTPS1 | membrane-bound transcription<br>factor peptidase, site 1               | -<br>1.48 |
| 201624_at   | DARS   | aspartyl-tRNA synthetase                                               | -<br>1.88 |
| 201632_at   | EIF2B1 | eukaryotic translation initiation<br>factor 2B, subunit 1 alpha, 26kDa | -<br>-1.6 |
| 201644_at   | TSTA3  | tissue specific transplantation<br>antigen P35B                        | -<br>2.28 |



|             |        |                                       |      |
|-------------|--------|---------------------------------------|------|
|             |        |                                       | -    |
| 201659_s_at | ARL1   | ADP-ribosylation factor-like 1        | 2.41 |
|             |        | structural maintenance of             | -    |
| 201663_s_at | SMC4   | chromosomes 4                         | 1.45 |
|             |        | proteasome (prosome, macropain)       |      |
| 201676_x_at | PSMA1  | subunit, alpha type, 1                | -1.5 |
|             |        |                                       | -    |
| 201690_s_at | TPD52  | tumor protein D52                     | 2.18 |
| 201691_s_at | TPD52  | tumor protein D52                     | -1.4 |
|             |        | DNA (cytosine-5)-                     | -    |
| 201697_s_at | DNMT1  | methyltransferase 1                   | 1.64 |
|             |        | splicing factor, arginine/serine-rich | -    |
| 201698_s_at | SFRS9  | 9                                     | 1.95 |
|             |        |                                       | -    |
| 201716_at   | SNX1   | sorting nexin 1                       | 1.55 |
|             |        | mitochondrial ribosomal protein       |      |
| 201717_at   | MRPL49 | L49                                   | -1.6 |

|             |          |                                                                                        |           |
|-------------|----------|----------------------------------------------------------------------------------------|-----------|
| 201726_at   | ELAVL1   | ELAV (embryonic lethal, abnormal vision, Drosophila)-like 1 (Hu antigen R)             | -<br>1.73 |
| 201741_x_at | SFRS1    | splicing factor, arginine/serine-rich 1 (splicing factor 2, alternate splicing factor) | -<br>1.16 |
| 201746_at   | TP53     | tumor protein p53 (Li-Fraumeni syndrome)                                               | -<br>1.68 |
| 201776_s_at | KIAA0494 | KIAA0494                                                                               | -<br>2.09 |
| 201777_s_at | KIAA0494 | KIAA0494                                                                               | -<br>1.39 |
| 201819_at   | SCARB1   | scavenger receptor class B, member 1                                                   | -<br>1.98 |
| 201850_at   | CAPG     | capping protein (actin filament), gelsolin-like                                        | 1.55      |

|             |         |                                                                                              |           |
|-------------|---------|----------------------------------------------------------------------------------------------|-----------|
| 201861_s_at | LRRFIP1 | leucine rich repeat (in FLII)<br>interacting protein 1                                       | 1.69      |
| 201881_s_at | ARIH1   | ariadne homolog, ubiquitin-<br>conjugating enzyme E2 binding<br>protein, 1 (Drosophila)      | -<br>1.63 |
| 201885_s_at | CYB5R3  | cytochrome b5 reductase 3                                                                    | -<br>1.88 |
| 201897_s_at | CKS1B   | CDC28 protein kinase regulatory<br>subunit 1B                                                | -<br>2.12 |
| 201898_s_at | UBE2A   | ubiquitin-conjugating enzyme E2A<br>(RAD6 homolog)                                           | -<br>1.52 |
| 201906_s_at | CTDSPL  | CTD (carboxy-terminal domain,<br>RNA polymerase II, polypeptide A)<br>small phosphatase-like | 1.76      |

|             |          |                                                               |      |
|-------------|----------|---------------------------------------------------------------|------|
|             |          |                                                               | -    |
| 201937_s_at | DNPEP    | aspartyl aminopeptidase                                       | 1.52 |
|             |          | glyceronephosphate O-                                         | -    |
| 201956_s_at | GNPAT    | acyltransferase                                               | 1.38 |
|             |          | chromosome 7 open reading frame                               | -    |
| 201973_s_at | C7orf28B | 28B                                                           | 1.84 |
|             |          |                                                               | -    |
| 201977_s_at | KIAA0141 | KIAA0141                                                      | 1.53 |
|             |          | protein phosphatase 5, catalytic                              | -    |
| 201979_s_at | PPP5C    | subunit                                                       | 1.62 |
|             |          |                                                               | -    |
| 201994_at   | MORF4L2  | mortality factor 4 like 2                                     | 1.54 |
|             |          |                                                               | -    |
| 202012_s_at | EXT2     | exostoses (multiple) 2                                        | 1.95 |
|             |          |                                                               | -    |
| 202013_s_at | EXT2     | exostoses (multiple) 2                                        | -1.8 |
|             |          |                                                               | -    |
| 202024_at   | ASNA1    | arsA arsenite transporter, ATP-binding, homolog 1 (bacterial) | 1.57 |

|             |          |                                                 |           |
|-------------|----------|-------------------------------------------------|-----------|
| 202030_at   | BCKDK    | branched chain ketoacid<br>dehydrogenase kinase | -<br>1.55 |
| 202058_s_at | KPNA1    | karyopherin alpha 1 (importin alpha<br>5)       | -<br>2.39 |
| 202059_s_at | KPNA1    | karyopherin alpha 1 (importin alpha<br>5)       | -<br>1.93 |
| 202061_s_at | SEL1L    | sel-1 suppressor of lin-12-like (C.<br>elegans) | -<br>2.04 |
| 202069_s_at | IDH3A    | isocitrate dehydrogenase 3 (NAD+)<br>alpha      | -<br>2.18 |
| 202106_at   | GOLGA3   | golgi autoantigen, golgin subfamily<br>a, 3     | -<br>1.67 |
| 202128_at   | KIAA0317 | KIAA0317                                        | -<br>1.68 |

|             |         |                                                                                                                                     |           |
|-------------|---------|-------------------------------------------------------------------------------------------------------------------------------------|-----------|
| 202176_at   | ERCC3   | excision repair cross-complementing rodent repair deficiency, complementation group 3 (xeroderma pigmentosum group B complementing) | -<br>1.54 |
| 202185_at   | PLOD3   | procollagen-lysine, 2-oxoglutarate 5-dioxygenase 3                                                                                  | -<br>2.02 |
| 202186_x_at | PPP2R5A | protein phosphatase 2, regulatory subunit B', alpha isoform                                                                         | 1.91      |
| 202187_s_at | PPP2R5A | protein phosphatase 2, regulatory subunit B', alpha isoform                                                                         | -<br>1.61 |
| 202191_s_at | GAS7    | growth arrest-specific 7                                                                                                            | 1.69      |
| 202192_s_at | GAS7    | growth arrest-specific 7                                                                                                            | 1.39      |

|             |        |                                                          |           |
|-------------|--------|----------------------------------------------------------|-----------|
|             |        | transmembrane emp24 protein                              | -         |
| 202194_at   | TMED5  | transport domain containing 5                            | 2.44      |
|             |        |                                                          | -         |
| 202200_s_at | SRPK1  | SFRS protein kinase 1                                    | 1.85      |
|             |        |                                                          | -         |
| 202204_s_at | AMFR   | autocrine motility factor receptor                       | 2.14      |
|             |        |                                                          |           |
| 202216_x_at | NFYC   | nuclear transcription factor Y,<br>gamma                 | -1.5      |
| 202222_s_at | DES    | desmin                                                   | 1.57      |
|             |        |                                                          |           |
| 202229_s_at | CHERP  | calcium homeostasis endoplasmic<br>reticulum protein     | -<br>1.31 |
|             |        |                                                          | -         |
| 202242_at   | TSPAN7 | tetraspanin 7                                            | 1.81      |
|             |        |                                                          |           |
| 202243_s_at | PSMB4  | proteasome (prosome, macropain)<br>subunit, beta type, 4 | -<br>1.73 |

|             |         |                                                                    |           |
|-------------|---------|--------------------------------------------------------------------|-----------|
|             |         | proteasome (prosome, macropain)                                    | -         |
| 202244_at   | PSMB4   | subunit, beta type, 4                                              | 1.48      |
|             |         |                                                                    | -         |
| 202246_s_at | CDK4    | cyclin-dependent kinase 4                                          | 1.52      |
|             |         |                                                                    |           |
| 202261_at   | VPS72   | vacuolar protein sorting 72 homolog<br>( <i>S. cerevisiae</i> )    | -1.6      |
|             |         |                                                                    |           |
| 202285_s_at | TACSTD2 | tumor-associated calcium signal<br>transducer 2                    | 1.36      |
|             |         |                                                                    |           |
| 202331_at   | BCKDHA  | branched chain keto acid<br>dehydrogenase E1, alpha<br>polypeptide | -<br>1.56 |
|             |         |                                                                    | -         |
| 202346_at   | HIP2    | huntingtin interacting protein 2                                   | 1.82      |
|             |         |                                                                    |           |
| 202352_s_at | PSMD12  | proteasome (prosome, macropain)<br>26S subunit, non-ATPase, 12     | -<br>2.01 |



|             |          |                                    |      |
|-------------|----------|------------------------------------|------|
|             |          | proteasome (prosome, macropain)    | -    |
| 202353_s_at | PSMD12   | 26S subunit, non-ATPase, 12        | 2.55 |
|             |          | RAB3 GTPase activating protein     | -    |
| 202374_s_at | RAB3GAP2 | subunit 2 (non-catalytic)          | 1.51 |
|             |          | Treacher Collins-Franceschetti     |      |
| 202384_s_at | TCOF1    | syndrome 1                         | 1.57 |
|             |          | ATP-binding cassette, sub-family F | -    |
| 202394_s_at | ABCF3    | (GCN20), member 3                  | 1.31 |
|             |          |                                    | -    |
| 202397_at   | NUTF2    | nuclear transport factor 2         | 1.64 |
|             |          | adaptor-related protein complex 3, | -    |
| 202398_at   | AP3S2    | sigma 2 subunit                    | 1.25 |
|             |          | insulin-like growth factor 2       | -    |
| 202409_at   | IGF2     | (somatomedin A)                    | 1.62 |

|             |         |                                                                 |      |
|-------------|---------|-----------------------------------------------------------------|------|
|             |         |                                                                 |      |
| 202417_at   | KEAP1   | kelch-like ECH-associated protein 1                             | 1.39 |
| 202471_s_at | IDH3G   | isocitrate dehydrogenase 3 (NAD+)<br>gamma                      | 1.48 |
| 202482_x_at | RANBP1  | RAN binding protein 1                                           | 1.53 |
| 202495_at   | TBCC    | tubulin folding cofactor C                                      | -1.6 |
| 202514_at   | DLG1    | discs, large homolog 1 (Drosophila)                             | 1.73 |
| 202520_s_at | MLH1    | mutL homolog 1, colon cancer,<br>nonpolyposis type 2 (E. coli)  | 2.14 |
| 202529_at   | PRPSAP1 | phosphoribosyl pyrophosphate<br>synthetase-associated protein 1 | 1.82 |
| 202530_at   | MAPK14  | mitogen-activated protein kinase 14                             | -1.4 |

|             |         |                                     |      |
|-------------|---------|-------------------------------------|------|
|             |         |                                     | -    |
| 202543_s_at | GMFB    | glia maturation factor, beta        | 2.47 |
|             |         | chromosome 1 open reading frame     | -    |
| 202560_s_at | C1orf77 | 77                                  | 1.81 |
|             |         | chromosome 14 open reading frame    |      |
| 202563_at   | C14orf1 | 1                                   | 1.47 |
|             |         |                                     | -    |
| 202583_s_at | RANBP9  | RAN binding protein 9               | 1.49 |
|             |         | nuclear transcription factor, X-box | -    |
| 202584_at   | NFX1    | binding 1                           | 1.35 |
|             |         |                                     | -    |
| 202587_s_at | AK1     | adenylate kinase 1                  | 1.85 |
|             |         | neuroblastoma RAS viral (v-ras)     | -    |
| 202647_s_at | NRAS    | oncogene homolog                    | 1.59 |
|             |         |                                     |      |
|             |         | carbamoyl-phosphate synthetase 2,   |      |
|             |         | aspartate transcarbamylase, and     | -    |
| 202715_at   | CAD     | dihydroorotase                      | 1.63 |

|             |        |                                                                       |           |
|-------------|--------|-----------------------------------------------------------------------|-----------|
| 202717_s_at | CDC16  | cell division cycle 16 homolog (S. cerevisiae)                        | -<br>1.86 |
| 202754_at   | R3HDM1 | R3H domain containing 1                                               | -<br>1.76 |
| 202755_s_at | GPC1   | glypican 1                                                            | 1.38      |
| 202767_at   | ACP2   | acid phosphatase 2, lysosomal                                         | -<br>1.49 |
| 202802_at   | DHPS   | deoxyhypusine synthase                                                | -<br>1.57 |
| 202836_s_at | TXNL4A | thioredoxin-like 4A                                                   | -<br>2.11 |
| 202841_x_at | OGFR   | opioid growth factor receptor                                         | -<br>1.88 |
| 202845_s_at | RALBP1 | ralA binding protein 1                                                | -<br>1.38 |
| 202868_s_at | POP4   | processing of precursor 4, ribonuclease P/MRP subunit (S. cerevisiae) | -<br>1.61 |

|             |          |                                                                               |           |
|-------------|----------|-------------------------------------------------------------------------------|-----------|
| 202873_at   | ATP6V1C1 | ATPase, H <sup>+</sup> transporting, lysosomal<br>42kDa, V1 subunit C1        | -<br>1.22 |
| 202886_s_at | PPP2R1B  | protein phosphatase 2 (formerly<br>2A), regulatory subunit A, beta<br>isoform | -<br>2.85 |
| 202896_s_at | SIRPA    | signal-regulatory protein alpha                                               | -<br>1.78 |
| 202900_s_at | NUP88    | nucleoporin 88kDa                                                             | -<br>2.23 |
| 202917_s_at | S100A8   | S100 calcium binding protein A8                                               | -<br>5.57 |
| 202939_at   | ZMPSTE24 | zinc metallopeptidase (STE24<br>homolog, <i>S. cerevisiae</i> )               | -<br>2.12 |

|             |         |                                                                                     |           |
|-------------|---------|-------------------------------------------------------------------------------------|-----------|
| 202955_s_at | ARFGEF1 | ADP-ribosylation factor guanine nucleotide-exchange factor 1(brefeldin A-inhibited) | -<br>1.38 |
| 202977_s_at | CREBZF  | CREB/ATF bZIP transcription factor                                                  | 1.82      |
| 202986_at   | ARNT2   | aryl-hydrocarbon receptor nuclear translocator 2                                    | 1.2       |
| 202997_s_at | LOXL2   | lysyl oxidase-like 2                                                                | 1.26      |
| 203032_s_at | FH      | fumarate hydratase                                                                  | -<br>2.34 |
| 203052_at   | C2      | complement component 2                                                              | -<br>1.66 |
| 203059_s_at | PAPSS2  | 3'-phosphoadenosine 5'-phosphosulfate synthase 2                                    | -<br>2.44 |

|             |        |                                                                                          |           |
|-------------|--------|------------------------------------------------------------------------------------------|-----------|
| 203060_s_at | PAPSS2 | 3'-phosphoadenosine 5'-<br>phosphosulfate synthase 2                                     | -<br>2.07 |
| 203089_s_at | HTRA2  | HtrA serine peptidase 2                                                                  | -<br>1.65 |
| 203116_s_at | FECH   | ferrochelatase (protoporphyrin)                                                          | -<br>1.83 |
| 203118_at   | PCSK7  | proprotein convertase<br>subtilisin/kexin type 7                                         | -<br>1.36 |
| 203122_at   | TTC15  | tetratricopeptide repeat domain 15                                                       | -<br>1.69 |
| 203150_at   | RABEPK | Rab9 effector protein with kelch<br>motifs                                               | -<br>1.86 |
| 203189_s_at | NDUFS8 | NADH dehydrogenase (ubiquinone)<br>Fe-S protein 8, 23kDa (NADH-<br>coenzyme Q reductase) | -<br>1.82 |

|             |         |                                                                                          |           |
|-------------|---------|------------------------------------------------------------------------------------------|-----------|
| 203190_at   | NDUFS8  | NADH dehydrogenase (ubiquinone)<br>Fe-S protein 8, 23kDa (NADH-<br>coenzyme Q reductase) | -<br>1.84 |
| 203191_at   | ABCB6   | ATP-binding cassette, sub-family B<br>(MDR/TAP), member 6                                | 1.62      |
| 203194_s_at | NUP98   | nucleoporin 98kDa                                                                        | -<br>1.42 |
| 203199_s_at | MTRR    | 5-methyltetrahydrofolate-<br>homocysteine methyltransferase<br>reductase                 | -<br>1.75 |
| 203201_at   | PMM2    | phosphomannomutase 2                                                                     | -<br>1.69 |
| 203218_at   | MAPK9   | mitogen-activated protein kinase 9                                                       | -<br>1.71 |
| 203225_s_at | RFK     | riboflavin kinase                                                                        | -<br>2.32 |
| 203226_s_at | TSPAN31 | tetraspanin 31                                                                           | -         |



|             |         |                                                                     |           |
|-------------|---------|---------------------------------------------------------------------|-----------|
|             |         |                                                                     | 1.51      |
| 203246_s_at | TUSC4   | tumor suppressor candidate 4                                        | -<br>1.67 |
| 203253_s_at | HISPPD1 | histidine acid phosphatase domain<br>containing 1                   | -<br>1.83 |
| 203274_at   | F8A1    | coagulation factor VIII-associated<br>(intronic transcript) 1       | -<br>1.61 |
| 203293_s_at | LMAN1   | lectin, mannose-binding, 1                                          | -<br>2.95 |
| 203307_at   | GNL1    | guanine nucleotide binding protein-<br>like 1                       | 1.95      |
| 203342_at   | TIMM17B | translocase of inner mitochondrial<br>membrane 17 homolog B (yeast) | -1.5      |
| 203350_at   | AP1G1   | adaptor-related protein complex 1,<br>gamma 1 subunit               | -<br>1.63 |

|             |        |                                                       |           |
|-------------|--------|-------------------------------------------------------|-----------|
| 203351_s_at | ORC4L  | origin recognition complex, subunit<br>4-like (yeast) | -<br>1.61 |
| 203352_at   | ORC4L  | origin recognition complex, subunit<br>4-like (yeast) | -<br>1.21 |
| 203355_s_at | PSD3   | pleckstrin and Sec7 domain<br>containing 3            | 3.04      |
| 203374_s_at | TPP2   | tripeptidyl peptidase II                              | -<br>1.72 |
| 203405_at   | DSCR2  | Down syndrome critical region gene<br>2               | -<br>1.99 |
| 203426_s_at | IGFBP5 | insulin-like growth factor binding<br>protein 5       | 1.31      |
| 203437_at   | TMEM11 | transmembrane protein 11                              | -<br>1.35 |
| 203440_at   | CDH2   | cadherin 2, type 1, N-cadherin<br>(neuronal)          | 1.41      |

|             |        |                                                                           |      |
|-------------|--------|---------------------------------------------------------------------------|------|
|             |        | proteasome (prosome, macropain)                                           | -    |
| 203447_at   | PSMD5  | 26S subunit, non-ATPase, 5                                                | 1.87 |
|             |        |                                                                           | -    |
| 203502_at   | BPGM   | 2,3-bisphosphoglycerate mutase                                            | 1.57 |
|             |        |                                                                           | -    |
| 203504_s_at | ABCA1  | ATP-binding cassette, sub-family A<br>(ABC1), member 1                    | 2.99 |
|             |        |                                                                           | -    |
| 203517_at   | MTX2   | metaxin 2                                                                 | 1.56 |
|             |        |                                                                           | -    |
| 203534_at   | LSM1   | LSM1 homolog, U6 small nuclear<br>RNA associated ( <i>S. cerevisiae</i> ) | 1.55 |
|             |        |                                                                           | -    |
| 203585_at   | ZNF185 | zinc finger protein 185 (LIM<br>domain)                                   | 1.5  |
|             |        |                                                                           | -    |
| 203594_at   | RTCD1  | RNA terminal phosphate cyclase<br>domain 1                                | 1.88 |

|             |        |                                                                      |           |
|-------------|--------|----------------------------------------------------------------------|-----------|
| 203595_s_at | IFIT5  | interferon-induced protein with<br>tetratricopeptide repeats 5       | -1.6      |
| 203614_at   | UTP14C | UTP14, U3 small nucleolar<br>ribonucleoprotein, homolog C<br>(yeast) | -<br>2.32 |
| 203625_x_at | SKP2   | S-phase kinase-associated protein 2<br>(p45)                         | -<br>2.33 |
| 203648_at   | TATDN2 | TatD DNase domain containing 2                                       | -<br>1.33 |
| 203669_s_at | DGAT1  | diacylglycerol O-acyltransferase<br>homolog 1 (mouse)                | -<br>1.92 |
| 203670_at   | TTLL3  | tubulin tyrosine ligase-like family,<br>member 3                     | 1.7       |
| 203676_at   | GNS    | glucosamine (N-acetyl)-6-sulfatase<br>(Sanfilippo disease IIID)      | -<br>1.67 |
| 203686_at   | MPG    | N-methylpurine-DNA glycosylase                                       | -<br>1.38 |

|             |         |                                                                                                                                 |           |
|-------------|---------|---------------------------------------------------------------------------------------------------------------------------------|-----------|
| 203720_s_at | ERCC1   | excision repair cross-complementing rodent repair deficiency, complementation group 1 (includes overlapping antisense sequence) | -<br>1.54 |
| 203749_s_at | RARA    | retinoic acid receptor, alpha                                                                                                   | -<br>1.94 |
| 203782_s_at | POLRMT  | polymerase (RNA) mitochondrial (DNA directed)                                                                                   | -<br>1.83 |
| 203785_s_at | DDX28   | DEAD (Asp-Glu-Ala-Asp) box polypeptide 28                                                                                       | -<br>1.59 |
| 203786_s_at | TPD52L1 | tumor protein D52-like 1                                                                                                        | -<br>2.04 |
| 203799_at   | CD302   | CD302 molecule                                                                                                                  | -<br>1.81 |
| 203800_s_at | MRPS14  | mitochondrial ribosomal protein S14                                                                                             | -<br>1.89 |

|             |        |                                                              |           |
|-------------|--------|--------------------------------------------------------------|-----------|
| 203816_at   | DGUOK  | deoxyguanosine kinase                                        | -<br>1.63 |
| 203838_s_at | TNK2   | tyrosine kinase, non-receptor, 2                             | 1.5       |
| 203897_at   | LYRM1  | LYR motif containing 1                                       | -<br>2.07 |
| 203964_at   | NMI    | N-myc (and STAT) interactor                                  | -<br>1.76 |
| 203970_s_at | PEX3   | peroxisomal biogenesis factor 3                              | -<br>2.23 |
| 203972_s_at | PEX3   | peroxisomal biogenesis factor 3                              | -<br>2.53 |
| 203974_at   | HDHD1A | haloacid dehalogenase-like<br>hydrolase domain containing 1A | -1.5      |
| 203976_s_at | CHAF1A | chromatin assembly factor 1,<br>subunit A (p150)             | 1.4       |
| 203978_at   | NUBP1  | nucleotide binding protein 1 (MinD<br>homolog, E. coli)      | -<br>1.61 |

|             |        |                                                                                 |           |
|-------------|--------|---------------------------------------------------------------------------------|-----------|
| 204016_at   | LARS2  | leucyl-tRNA synthetase 2,<br>mitochondrial                                      | -<br>1.49 |
| 204023_at   | RFC4   | replication factor C (activator 1) 4,<br>37kDa                                  | -<br>1.64 |
| 204025_s_at | PDCD2  | programmed cell death 2                                                         | -<br>1.77 |
| 204027_s_at | METTL1 | methyltransferase like 1                                                        | -<br>1.82 |
| 204039_at   | CEBPA  | CCAAT/enhancer binding protein<br>(C/EBP), alpha                                | -<br>2.35 |
| 204082_at   | PBX3   | pre-B-cell leukemia homeobox 3                                                  | -<br>1.69 |
| 204087_s_at | SLC5A6 | solute carrier family 5 (sodium-<br>dependent vitamin transporter),<br>member 6 | -<br>3.03 |
| 204091_at   | PDE6D  | phosphodiesterase 6D, cGMP-<br>specific, rod, delta                             | -<br>1.45 |
| 204119_s_at | ADK    | adenosine kinase                                                                | -<br>2.28 |

|             |          |                                                     |      |
|-------------|----------|-----------------------------------------------------|------|
|             |          |                                                     | -    |
| 204143_s_at | ENOSF1   | enolase superfamily member 1                        | 2.09 |
| 204147_s_at | TFDP1    | transcription factor Dp-1                           | 1.26 |
| 204185_x_at | PPID     | peptidylprolyl isomerase D<br>(cyclophilin D)       | 2.28 |
| 204189_at   | RARG     | retinoic acid receptor, gamma                       | 1.41 |
| 204208_at   | RNGTT    | RNA guanylyltransferase and 5'-<br>phosphatase      | 1.27 |
| 204224_s_at | GCH1     | GTP cyclohydrolase 1 (dopa-<br>responsive dystonia) | 2.12 |
| 204238_s_at | C6orf108 | chromosome 6 open reading frame<br>108              | -2   |
| 204240_s_at | SMC2     | structural maintenance of<br>chromosomes 2          | 1.29 |
| 204244_s_at | DBF4     | DBF4 homolog ( <i>S. cerevisiae</i> )               | 1.32 |



|             |        |                                                                     |      |
|-------------|--------|---------------------------------------------------------------------|------|
|             |        |                                                                     | -    |
| 204246_s_at | DCTN3  | dynactin 3 (p22)                                                    | 1.62 |
|             |        |                                                                     | -    |
| 204247_s_at | CDK5   | cyclin-dependent kinase 5                                           | 1.45 |
|             |        |                                                                     |      |
| 204248_at   | GNA11  | guanine nucleotide binding protein (G protein), alpha 11 (Gq class) | 2.21 |
|             |        |                                                                     | -    |
| 204276_at   | TK2    | thymidine kinase 2, mitochondrial                                   | 1.65 |
|             |        |                                                                     |      |
| 204278_s_at | EBAG9  | estrogen receptor binding site associated, antigen, 9               | 1.79 |
|             |        |                                                                     |      |
| 204292_x_at | STK11  | serine/threonine kinase 11                                          | 1.76 |
|             |        |                                                                     |      |
| 204299_at   | FUSIP1 | FUS interacting protein (serine/arginine-rich) 1                    | 1.98 |
|             |        |                                                                     |      |
| 204328_at   | TMC6   | transmembrane channel-like 6                                        | 1.58 |
|             |        |                                                                     |      |
| 204331_s_at | MRPS12 | mitochondrial ribosomal protein S12                                 | 2.81 |

|             |         |                                                                  |           |
|-------------|---------|------------------------------------------------------------------|-----------|
| 204344_s_at | SEC23A  | Sec23 homolog A ( <i>S. cerevisiae</i> )                         | -<br>1.94 |
| 204354_at   | POT1    | POT1 protection of telomeres 1<br>homolog ( <i>S. pombe</i> )    | -1.6      |
| 204355_at   | DHX30   | DEAH (Asp-Glu-Ala-His) box<br>polypeptide 30                     | -1.8      |
| 204366_s_at | GTF3C2  | general transcription factor IIIC,<br>polypeptide 2, beta 110kDa | -<br>1.48 |
| 204376_at   | VPRBP   | Vpr (HIV-1) binding protein                                      | -<br>1.15 |
| 204390_at   | TRIM24  | tripartite motif-containing 24                                   | 1.55      |
| 204394_at   | SLC43A1 | solute carrier family 43, member 1                               | -<br>1.82 |
| 204423_at   | MKLN1   | muskelin 1, intracellular mediator<br>containing kelch motifs    | -<br>1.33 |

|             |         |                                                                  |           |
|-------------|---------|------------------------------------------------------------------|-----------|
| 204426_at   | TMED2   | transmembrane emp24 domain<br>trafficking protein 2              | -<br>2.86 |
| 204433_s_at | SPATA2  | spermatogenesis associated 2                                     | -<br>1.33 |
| 204442_x_at | LTBP4   | latent transforming growth factor<br>beta binding protein 4      | 1.54      |
| 204473_s_at | ZNF592  | zinc finger protein 592                                          | -<br>1.49 |
| 204480_s_at | C9orf16 | chromosome 9 open reading frame<br>16                            | -<br>1.79 |
| 204486_at   | KCNQ1   | potassium voltage-gated channel,<br>KQT-like subfamily, member 1 | 1.74      |
| 204488_at   | DOLK    | dolichol kinase                                                  | -<br>1.49 |
| 204493_at   | BID     | BH3 interacting domain death<br>agonist                          | -<br>1.87 |

|             |          |                                                                          |           |
|-------------|----------|--------------------------------------------------------------------------|-----------|
| 204507_s_at | PPP3R1   | protein phosphatase 3 (formerly 2B), regulatory subunit B, alpha isoform | -<br>1.43 |
| 204535_s_at | REST     | RE1-silencing transcription factor                                       | 1.87      |
| 204590_x_at | VPS33A   | vacuolar protein sorting 33 homolog A ( <i>S. cerevisiae</i> )           | -<br>1.27 |
| 204593_s_at | SMCR7L   | Smith-Magenis syndrome chromosome region, candidate 7-like               | -<br>1.72 |
| 204599_s_at | MRPL28   | mitochondrial ribosomal protein L28                                      | 1.81      |
| 204666_s_at | SIKE     | suppressor of IKK epsilon                                                | -<br>1.13 |
| 204676_at   | TMEM186  | transmembrane protein 186                                                | -<br>1.44 |
| 204699_s_at | C1orf107 | chromosome 1 open reading frame 107                                      | -<br>1.67 |

|             |          |                                                      |      |
|-------------|----------|------------------------------------------------------|------|
|             |          | chromosome 1 open reading frame                      | -    |
| 204700_x_at | C1orf107 | 107                                                  | 2.67 |
| 204718_at   | EPHB6    | EPH receptor B6                                      | 1.71 |
|             |          |                                                      | -    |
| 204725_s_at | NCK1     | NCK adaptor protein 1                                | 1.57 |
| 204736_s_at | CSPG4    | chondroitin sulfate proteoglycan 4                   | 1.27 |
|             |          |                                                      | -    |
| 204744_s_at | IARS     | isoleucyl-tRNA synthetase                            | 1.95 |
|             |          |                                                      | -    |
| 204752_x_at | PARP2    | poly (ADP-ribose) polymerase family, member 2        | 1.54 |
|             |          |                                                      | -    |
| 204792_s_at | IFT140   | intraflagellar transport 140 homolog (Chlamydomonas) | 1.27 |
|             |          |                                                      | -    |
| 204849_at   | TCFL5    | transcription factor-like 5 (basic helix-loop-helix) | 1.93 |
| 204854_at   | LEPREL2  | leprecan-like 2                                      | 1.64 |
|             |          |                                                      | -    |
| 204866_at   | PHF16    | PHD finger protein 16                                | 1.67 |

|             |          |                                                                    |      |
|-------------|----------|--------------------------------------------------------------------|------|
|             |          | immature colon carcinoma                                           | -    |
| 204868_at   | ICT1     | transcript 1                                                       | 1.52 |
| 204877_s_at | TAOK2    | TAO kinase 2                                                       | 1.3  |
| 204885_s_at | MSLN     | mesothelin                                                         | 1.49 |
| 204899_s_at | SAP30    | Sin3A-associated protein, 30kDa                                    | 1.47 |
|             |          | eukaryotic translation elongation                                  | -    |
| 204905_s_at | EEF1E1   | factor 1 epsilon 1                                                 | 2.13 |
| 204922_at   | C11orf80 | chromosome 11 open reading frame<br>80                             | 1.44 |
|             |          | mitogen-activated protein kinase                                   |      |
| 204936_at   | MAP4K2   | kinase kinase kinase 2                                             | 1.28 |
|             |          | dual-specificity tyrosine-(Y)-<br>phosphorylation regulated kinase |      |
| 204954_s_at | DYRK1B   | 1B                                                                 | 1.5  |
|             |          | origin recognition complex, subunit                                | -    |
| 204957_at   | ORC5L    | 5-like (yeast)                                                     | 1.77 |

|             |          |                                                                                              |           |
|-------------|----------|----------------------------------------------------------------------------------------------|-----------|
|             |          | trafficking protein particle complex                                                         | -         |
| 204985_s_at | TRAPPC6A | 6A                                                                                           | 1.31      |
| 205028_at   | TRO      | trophinin                                                                                    | 1.41      |
|             |          |                                                                                              |           |
| 205035_at   | CTDP1    | CTD (carboxy-terminal domain,<br>RNA polymerase II, polypeptide A)<br>phosphatase, subunit 1 | -<br>1.41 |
|             |          |                                                                                              |           |
| 205050_s_at | MAPK8IP2 | mitogen-activated protein kinase 8<br>interacting protein 2                                  | 1.82      |
|             |          |                                                                                              |           |
| 205053_at   | PRIM1    | primase, DNA, polypeptide 1<br>(49kDa)                                                       | -<br>1.23 |
| 205058_at   | IDUA     | iduronidase, alpha-L-                                                                        | 1.7       |
|             |          |                                                                                              |           |
| 205140_at   | FPGT     | fucose-1-phosphate<br>guanylyltransferase                                                    | -<br>1.67 |
|             |          |                                                                                              |           |
| 205142_x_at | ABCD1    | ATP-binding cassette, sub-family D<br>(ALD), member 1                                        | -<br>1.45 |
| 205168_at   | DDR2     | discoidin domain receptor family,                                                            | 1.75      |

|             |          |                                                                                          |           |
|-------------|----------|------------------------------------------------------------------------------------------|-----------|
|             |          | member 2                                                                                 |           |
| 205170_at   | STAT2    | signal transducer and activator of transcription 2, 113kDa                               | -1.3      |
| 205183_at   | HNRPD    | heterogeneous nuclear ribonucleoprotein D (AU-rich element RNA binding protein 1, 37kDa) | 1.53      |
| 205235_s_at | MPHOSPH1 | M-phase phosphoprotein 1                                                                 | -<br>1.18 |
| 205241_at   | SCO2     | SCO cytochrome oxidase deficient homolog 2 (yeast)                                       | -1.7      |
| 205264_at   | CD3EAP   | CD3e molecule, epsilon associated protein                                                | -<br>1.37 |
| 205275_at   | GTPBP1   | GTP binding protein 1                                                                    | 1.32      |
| 205276_s_at | GTPBP1   | GTP binding protein 1                                                                    | 1.47      |



|             |        |                                                          |           |
|-------------|--------|----------------------------------------------------------|-----------|
| 205285_s_at | FYB    | FYN binding protein (FYB-120/130)                        | 1.53      |
| 205305_at   | FGL1   | fibrinogen-like 1                                        | -<br>1.59 |
| 205324_s_at | FTSJ1  | FtsJ homolog 1 (E. coli)                                 | -<br>2.86 |
| 205332_at   | RCE1   | RCE1 homolog, prenyl protein peptidase (S. cerevisiae)   | 1.37      |
| 205335_s_at | SRP19  | signal recognition particle 19kDa                        | -<br>2.25 |
| 205409_at   | FOSL2  | FOS-like antigen 2                                       | 1.57      |
| 205410_s_at | ATP2B4 | ATPase, Ca <sup>++</sup> transporting, plasma membrane 4 | -<br>1.23 |
| 205439_at   | GSTT2  | glutathione S-transferase theta 2                        | -<br>1.75 |
| 205462_s_at | HPCAL1 | hippocalcin-like 1                                       | -<br>1.47 |

|             |          |                                                              |           |
|-------------|----------|--------------------------------------------------------------|-----------|
| 205537_s_at | VAV2     | vav 2 guanine nucleotide exchange factor                     | 1.96      |
| 205546_s_at | TYK2     | tyrosine kinase 2                                            | -1.5      |
| 205586_x_at | VGF      | VGF nerve growth factor inducible                            | 1.35      |
| 205588_s_at | FGFR1OP  | FGFR1 oncogene partner                                       | -<br>1.43 |
| 205607_s_at | SCYL3    | SCY1-like 3 ( <i>S. cerevisiae</i> )                         | -<br>1.52 |
| 205608_s_at | ANGPT1   | angiopoietin 1                                               | 1.59      |
| 205609_at   | ANGPT1   | angiopoietin 1                                               | 1.73      |
| 205621_at   | ALKBH1   | alkB, alkylation repair homolog 1 ( <i>E. coli</i> )         | -<br>1.34 |
| 205693_at   | TNNT3    | troponin T type 3 (skeletal, fast)                           | 1.43      |
| 205704_s_at | ATP6V0A2 | ATPase, H <sup>+</sup> transporting, lysosomal V0 subunit a2 | -<br>1.46 |

|             |         |                                                                      |           |
|-------------|---------|----------------------------------------------------------------------|-----------|
| 205706_s_at | ANKRD26 | ankyrin repeat domain 26                                             | 1.21      |
| 205707_at   | IL17RA  | interleukin 17 receptor A                                            | -<br>1.72 |
| 205717_x_at | PCDHGC3 | protocadherin gamma subfamily C,<br>3                                | -<br>1.38 |
| 205734_s_at | AFF3    | AF4/FMR2 family, member 3                                            | 1.44      |
| 205740_s_at | RBM42   | RNA binding motif protein 42                                         | -<br>1.46 |
| 205756_s_at | F8      | coagulation factor VIII,<br>procoagulant component<br>(hemophilia A) | -<br>1.97 |
| 205766_at   | TCAP    | titin-cap (telethonin)                                               | 1.88      |
| 205770_at   | GSR     | glutathione reductase                                                | -<br>1.78 |
| 205781_at   | C16orf7 | chromosome 16 open reading frame<br>7                                | 1.5       |
| 205824_at   | HSPB2   | heat shock 27kDa protein 2                                           | 1.41      |

|             |         |                                                            |           |
|-------------|---------|------------------------------------------------------------|-----------|
| 205852_at   | CDK5R2  | cyclin-dependent kinase 5,<br>regulatory subunit 2 (p39)   | 1.75      |
| 205855_at   | ZNF197  | zinc finger protein 197                                    | 1.24      |
| 205914_s_at | GRIN1   | glutamate receptor, ionotropic, N-<br>methyl D-aspartate 1 | 2.25      |
| 205919_at   | HBE1    | hemoglobin, epsilon 1                                      | 1.37      |
| 205926_at   | IL27RA  | interleukin 27 receptor, alpha                             | 1.31      |
| 205963_s_at | DNAJA3  | DnaJ (Hsp40) homolog, subfamily<br>A, member 3             | -<br>1.79 |
| 206075_s_at | CSNK2A1 | casein kinase 2, alpha 1 polypeptide                       | -<br>1.43 |
| 206083_at   | BAI1    | brain-specific angiogenesis inhibitor<br>1                 | 1.45      |
| 206095_s_at | FUSIP1  | FUS interacting protein<br>(serine/arginine-rich) 1        | -<br>1.92 |

|             |          |                                                                                         |           |
|-------------|----------|-----------------------------------------------------------------------------------------|-----------|
| 206103_at   | RAC3     | ras-related C3 botulinum toxin substrate 3 (rho family, small GTP binding protein Rac3) | 1.48      |
| 206128_at   | ADRA2C   | adrenergic, alpha-2C-, receptor                                                         | 1.9       |
| 206136_at   | FZD5     | frizzled homolog 5 (Drosophila)                                                         | 1.56      |
| 206147_x_at | SCML2    | sex comb on midleg-like 2 (Drosophila)                                                  | -<br>1.51 |
| 206169_x_at | ZC3H7B   | zinc finger CCCH-type containing 7B                                                     | 2.24      |
| 206205_at   | MPHOSPH9 | M-phase phosphoprotein 9                                                                | -<br>1.66 |
| 206208_at   | CA4      | carbonic anhydrase IV                                                                   | 1.6       |
| 206209_s_at | CA4      | carbonic anhydrase IV                                                                   | 1.48      |
| 206238_s_at | YAF2     | YY1 associated factor 2                                                                 | -<br>1.33 |

|             |        |                                                                            |           |
|-------------|--------|----------------------------------------------------------------------------|-----------|
| 206246_at   | PFKFB4 | 6-phosphofructo-2-kinase/fructose-2,6-biphosphatase 4                      | 1.33      |
| 206284_x_at | CLTB   | clathrin, light chain (Lcb)                                                | -1.5      |
| 206302_s_at | NUDT4  | nudix (nucleoside diphosphate linked moiety X)-type motif 4                | -<br>2.08 |
| 206315_at   | CRLF1  | cytokine receptor-like factor 1                                            | 1.57      |
| 206333_at   | MSI1   | musashi homolog 1 (Drosophila)                                             | 1.49      |
| 206338_at   | ELAVL3 | ELAV (embryonic lethal, abnormal vision, Drosophila)-like 3 (Hu antigen C) | 2.18      |
| 206340_at   | NR1H4  | nuclear receptor subfamily 1, group H, member 4                            | -<br>2.35 |

|             |         |                                                                       |           |
|-------------|---------|-----------------------------------------------------------------------|-----------|
| 206347_at   | PDK3    | pyruvate dehydrogenase kinase,<br>isozyme 3                           | -<br>1.23 |
| 206348_s_at | PDK3    | pyruvate dehydrogenase kinase,<br>isozyme 3                           | -<br>1.25 |
| 206390_x_at | PF4     | platelet factor 4 (chemokine (C-X-C<br>motif) ligand 4)               | -<br>1.29 |
| 206397_x_at | GDF1    | growth differentiation factor 1                                       | 1.38      |
| 206399_x_at | CACNA1A | calcium channel, voltage-<br>dependent, P/Q type, alpha 1A<br>subunit | 2.53      |
| 206431_x_at | TBC1D9B | TBC1 domain family, member 9B<br>(with GRAM domain)                   | -<br>1.35 |
| 206491_s_at | NAPA    | N-ethylmaleimide-sensitive factor<br>attachment protein, alpha        | -<br>2.59 |

|             |        |                                                                       |           |
|-------------|--------|-----------------------------------------------------------------------|-----------|
| 206512_at   | ZRSR1  | zinc finger (CCCH type), RNA-binding motif and serine/arginine rich 1 | 1.3       |
| 206564_at   | OPRL1  | opiate receptor-like 1                                                | 1.42      |
| 206568_at   | TNP1   | transition protein 1 (during histone to protamine replacement)        | 1.31      |
| 206621_s_at | EIF4H  | eukaryotic translation initiation factor 4H                           | -<br>1.41 |
| 206650_at   | IQCC   | IQ motif containing C                                                 | 1.74      |
| 206655_s_at | GP1BB  | glycoprotein Ib (platelet), beta polypeptide                          | 1.52      |
| 206662_at   | GLRX   | glutaredoxin (thioltransferase)                                       | -<br>1.65 |
| 206665_s_at | BCL2L1 | BCL2-like 1                                                           | 1.54      |
| 206672_at   | AQP2   | aquaporin 2 (collecting duct)                                         | 1.41      |



|             |        |                                                             |           |
|-------------|--------|-------------------------------------------------------------|-----------|
| 206689_x_at | HTATIP | HIV-1 Tat interacting protein,<br>60kDa                     | -<br>1.46 |
| 206699_x_at | NPAS1  | neuronal PAS domain protein 1                               | 1.44      |
| 206746_at   | BFSP1  | beaded filament structural protein 1,<br>filensin           | 1.43      |
| 206760_s_at | FCER2  | Fc fragment of IgE, low affinity II,<br>receptor for (CD23) | 1.27      |
| 206761_at   | CD96   | CD96 molecule                                               | 1.26      |
| 206769_at   | TMSB4Y | thymosin, beta 4, Y-linked                                  | 1.31      |
| 206781_at   | DNAJC4 | DnaJ (Hsp40) homolog, subfamily<br>C, member 4              | 2         |
| 206815_at   | SPAG8  | sperm associated antigen 8                                  | 1.98      |
| 206816_s_at | SPAG8  | sperm associated antigen 8                                  | 1.68      |
| 206833_s_at | ACYP2  | acylphosphatase 2, muscle type                              | -<br>1.87 |

|             |         |                                                                                  |           |
|-------------|---------|----------------------------------------------------------------------------------|-----------|
|             |         |                                                                                  | -         |
| 206861_s_at | CGGBP1  | CGG triplet repeat binding protein 1                                             | 1.81      |
| 206897_at   | PAGE1   | P antigen family, member 1<br>(prostate associated)                              | 1.32      |
| 206902_s_at | ENDOGL1 | endonuclease G-like 1                                                            | 1.25      |
| 206903_at   |         | NA                                                                               | 1.28      |
| 206980_s_at | FLT3LG  | fms-related tyrosine kinase 3 ligand                                             | 1.33      |
| 206986_at   | FGF18   | fibroblast growth factor 18                                                      | 1.44      |
| 207004_at   | BCL2    | B-cell CLL/lymphoma 2                                                            | 1.58      |
| 207023_x_at | KRT10   | keratin 10 (epidermolytic<br>hyperkeratosis; keratosis palmaris et<br>plantaris) | -<br>2.21 |
| 207026_s_at | ATP2B3  | ATPase, Ca <sup>++</sup> transporting, plasma<br>membrane 3                      | -1.3      |

|             |          |                                                                                         |           |
|-------------|----------|-----------------------------------------------------------------------------------------|-----------|
| 207038_at   | SLC16A6  | solute carrier family 16, member 6<br>(monocarboxylic acid transporter 7)               | 1.35      |
| 207081_s_at | PI4KA    | phosphatidylinositol 4-kinase,<br>catalytic, alpha                                      | -<br>1.69 |
| 207088_s_at | SLC25A11 | solute carrier family 25<br>(mitochondrial carrier; oxoglutarate<br>carrier), member 11 | -<br>1.99 |
| 207163_s_at | AKT1     | v-akt murine thymoma viral<br>oncogene homolog 1                                        | -<br>1.73 |
| 207259_at   | C17orf73 | chromosome 17 open reading frame<br>73                                                  | 1.22      |
| 207289_at   | MMP25    | matrix metalloproteinase 25                                                             | 1.52      |

|             |        |                                                                                                          |           |
|-------------|--------|----------------------------------------------------------------------------------------------------------|-----------|
| 207321_s_at | ABCB9  | ATP-binding cassette, sub-family B<br>(MDR/TAP), member 9                                                | 1.3       |
| 207323_s_at | MBP    | myelin basic protein                                                                                     | 1.54      |
| 207337_at   | CTAG2  | cancer/testis antigen 2                                                                                  | 1.51      |
| 207350_s_at | VAMP4  | vesicle-associated membrane<br>protein 4                                                                 | -<br>1.26 |
| 207352_s_at | GABRB2 | gamma-aminobutyric acid (GABA)<br>A receptor, beta 2                                                     | 1.3       |
| 207363_at   | RS1    | retinoschisis (X-linked, juvenile) 1                                                                     | 1.18      |
| 207396_s_at | ALG3   | asparagine-linked glycosylation 3<br>homolog ( <i>S. cerevisiae</i> , alpha-1,3-<br>mannosyltransferase) | -<br>2.08 |
| 207438_s_at | SNUPN  | snurportin 1                                                                                             | -<br>1.62 |

|             |           |                                                                                          |           |
|-------------|-----------|------------------------------------------------------------------------------------------|-----------|
| 207439_s_at | SLC35A2   | solute carrier family 35 (UDP-galactose transporter), member A2                          | -<br>1.52 |
| 207451_at   | NKX2-8    | NK2 homeobox 8                                                                           | 1.75      |
| 207476_at   | ITSN2     | intersectin 2                                                                            | 1.52      |
| 207503_at   | TCP10     | t-complex 10 (mouse)                                                                     | 1.36      |
| 207511_s_at | C2orf24   | chromosome 2 open reading frame 24                                                       | 1.52      |
| 207514_s_at | GNAT1     | guanine nucleotide binding protein (G protein), alpha transducing activity polypeptide 1 | 1.14      |
| 207517_at   | LAMC2     | laminin, gamma 2                                                                         | 1.33      |
| 207555_s_at | TBXA2R    | thromboxane A2 receptor                                                                  | 1.89      |
| 207576_x_at | OXT       | oxytocin, prepro- (neurophysin I)                                                        | 1.96      |
| 207611_at   | HIST1H2BL | histone cluster 1, H2bl                                                                  | -<br>1.16 |

|             |          |                                                          |      |
|-------------|----------|----------------------------------------------------------|------|
| 207618_s_at | BCS1L    | BCS1-like (yeast)                                        | -1.4 |
| 207627_s_at | TFCP2    | transcription factor CP2                                 | 1.39 |
| 207640_x_at | NTN2L    | netrin 2-like (chicken)                                  | 1.48 |
| 207643_s_at | TNFRSF1A | tumor necrosis factor receptor<br>superfamily, member 1A | -1.6 |
| 207673_at   | NPHS1    | nephrosis 1, congenital, Finnish<br>type (nephrin)       | 1.26 |
| 207707_s_at | SEC13    | SEC13 homolog ( <i>S. cerevisiae</i> )                   | 1.73 |

|             |        |                                                                       |           |
|-------------|--------|-----------------------------------------------------------------------|-----------|
| 207734_at   | LAX1   | lymphocyte transmembrane adaptor<br>1                                 | 1.24      |
| 207758_at   | PPM1F  | protein phosphatase 1F (PP2C<br>domain containing)                    | 2.09      |
| 207764_s_at | HIPK3  | homeodomain interacting protein<br>kinase 3                           | -<br>1.25 |
| 207798_s_at | ATXN2L | ataxin 2-like                                                         | 1.44      |
| 207801_s_at | RNF10  | ring finger protein 10                                                | -<br>1.57 |
| 207804_s_at | FCN2   | ficolin (collagen/fibrinogen domain<br>containing lectin) 2 (hucolin) | -<br>3.58 |
| 207805_s_at | PSMD9  | proteasome (prosome, macropain)<br>26S subunit, non-ATPase, 9         | -<br>1.55 |

|             |         |                                                                               |           |
|-------------|---------|-------------------------------------------------------------------------------|-----------|
| 207824_s_at | MAZ     | MYC-associated zinc finger protein<br>(purine-binding transcription factor)   | -<br>1.27 |
| 207832_at   | BAIAP2  | BAI1-associated protein 2                                                     | 1.47      |
| 207891_s_at | UCHL5IP | UCHL5 interacting protein                                                     | -<br>1.18 |
| 207914_x_at | EVX1    | even-skipped homeobox 1                                                       | 3.03      |
| 207927_at   | HTR7    | 5-hydroxytryptamine (serotonin)<br>receptor 7 (adenylate cyclase-<br>coupled) | 1.48      |
| 207930_at   | LCN1    | lipocalin 1 (tear prealbumin)                                                 | 1.46      |
| 207949_s_at | ICA1    | islet cell autoantigen 1, 69kDa                                               | 1.57      |
| 207959_s_at | DNAH9   | dynein, axonemal, heavy chain 9                                               | 1.49      |
| 207972_at   | GLRA1   | glycine receptor, alpha 1 (startle<br>disease/hyperekplexia)                  | 1.25      |



|             |         |                                                                            |           |
|-------------|---------|----------------------------------------------------------------------------|-----------|
| 208037_s_at | MADCAM1 | mucosal vascular addressin cell<br>adhesion molecule 1                     | 1.51      |
| 208074_s_at | AP2S1   | adaptor-related protein complex 2,<br>sigma 1 subunit                      | -<br>1.54 |
| 208090_s_at | AIRE    | autoimmune regulator                                                       | 1.49      |
| 208101_s_at | URM1    | ubiquitin related modifier 1<br>homolog ( <i>S. cerevisiae</i> )           | -<br>1.31 |
| 208102_s_at | PSD     | pleckstrin and Sec7 domain<br>containing                                   | 1.35      |
| 208111_at   | AVPR2   | arginine vasopressin receptor 2<br>(nephrogenic diabetes insipidus)        | 1.92      |
| 208135_at   | TCF2    | transcription factor 2, hepatic; LF-<br>B3; variant hepatic nuclear factor | 1.43      |

|             |         |                                                              |           |
|-------------|---------|--------------------------------------------------------------|-----------|
|             |         | deoxyhypusine                                                |           |
| 208141_s_at | DOHH    | hydroxylase/monooxygenase                                    | 2.14      |
| 208201_at   | DUX4    | double homeobox, 4                                           | 1.47      |
| 208208_at   | MYH13   | myosin, heavy chain 13, skeletal muscle                      | 1.55      |
| 208232_x_at | NRG1    | neuregulin 1                                                 | 1.87      |
| 208242_at   | RAX     | retina and anterior neural fold homeobox                     | -<br>1.38 |
| 208258_s_at | GAS2L1  | growth arrest-specific 2 like 1                              | 1.89      |
| 208264_s_at | EIF3J   | eukaryotic translation initiation factor 3, subunit J        | -<br>2.64 |
| 208269_s_at | ADAM28  | ADAM metallopeptidase domain 28                              | 1.59      |
| 208299_at   | CACNA1I | calcium channel, voltage-dependent, T type, alpha 1I subunit | 1.41      |
| 208308_s_at | GPI     | glucose phosphate isomerase                                  | -<br>1.94 |

|             |         |                                                          |           |
|-------------|---------|----------------------------------------------------------|-----------|
| 208310_s_at | FSTL1   | follistatin-like 1                                       | -1.9      |
| 208316_s_at | OCRL    | oculocerebrorenal syndrome of<br>Lowe                    | -<br>1.34 |
| 208336_s_at | GPSN2   | glycoprotein, synaptic 2                                 | -<br>1.94 |
| 208351_s_at | MAPK1   | mitogen-activated protein kinase 1                       | -<br>1.29 |
| 208371_s_at | RING1   | ring finger protein 1                                    | -<br>1.51 |
| 208381_s_at | SGPL1   | sphingosine-1-phosphate lyase 1                          | -<br>1.21 |
| 208393_s_at | RAD50   | RAD50 homolog ( <i>S. cerevisiae</i> )                   | -1.7      |
| 208451_s_at | C4A     | complement component 4A<br>(Rodgers blood group)         | -<br>1.94 |
| 208453_s_at | XPNPEP1 | X-prolyl aminopeptidase<br>(aminopeptidase P) 1, soluble | -<br>1.59 |

|             |        |                                                           |           |
|-------------|--------|-----------------------------------------------------------|-----------|
| 208456_s_at | RRAS2  | related RAS viral (r-ras) oncogene<br>homolog 2           | -<br>1.53 |
| 208550_x_at | KCNG2  | potassium voltage-gated channel,<br>subfamily G, member 2 | 1.82      |
| 208552_at   | GRIK4  | glutamate receptor, ionotropic,<br>kainate 4              | 1.29      |
| 208554_at   | POU4F3 | POU class 4 homeobox 3                                    | 1.27      |
| 208584_at   | SNCG   | synuclein, gamma (breast cancer-<br>specific protein 1)   | 1.81      |
| 208612_at   | PDIA3  | protein disulfide isomerase family<br>A, member 3         | -<br>2.03 |
| 208619_at   | DDB1   | damage-specific DNA binding<br>protein 1, 127kDa          | -<br>1.56 |
| 208620_at   | PCBP1  | poly(rC) binding protein 1                                | -<br>1.69 |

|             |        |                                                                |           |
|-------------|--------|----------------------------------------------------------------|-----------|
| 208675_s_at | DDOST  | dolichyl-diphosphooligosaccharide-protein glycosyltransferase  | -<br>2.19 |
| 208699_x_at | TKT    | transketolase (Wernicke-Korsakoff syndrome)                    | -2.4      |
| 208709_s_at | NRD1   | nardilysin (N-arginine dibasic convertase)                     | -<br>1.63 |
| 208724_s_at | RAB1A  | RAB1A, member RAS oncogene family                              | -<br>1.84 |
| 208730_x_at | RAB2A  | RAB2A, member RAS oncogene family                              | 1.68      |
| 208731_at   | RAB2A  | RAB2A, member RAS oncogene family                              | -1.7      |
| 208777_s_at | PSMD11 | proteasome (prosome, macropain)<br>26S subunit, non-ATPase, 11 | -<br>1.74 |
| 208787_at   | MRPL3  | mitochondrial ribosomal protein L3                             | -2        |

|             |         |                                                             |      |
|-------------|---------|-------------------------------------------------------------|------|
|             |         |                                                             | -    |
| 208801_at   | SRP72   | signal recognition particle 72kDa                           | 1.97 |
|             |         |                                                             | -    |
| 208802_at   | SRP72   | signal recognition particle 72kDa                           | 2.13 |
|             |         |                                                             | -    |
| 208814_at   | HSPA4   | heat shock 70kDa protein 4                                  | -1.7 |
|             |         |                                                             | -    |
| 208824_x_at | PCTK1   | PCTAIRE protein kinase 1                                    | 1.47 |
|             |         |                                                             | -    |
| 208842_s_at | GORASP2 | golgi reassembly stacking protein 2,<br>55kDa               | 1.93 |
|             |         |                                                             | -    |
| 208843_s_at | GORASP2 | golgi reassembly stacking protein 2,<br>55kDa               | 2.03 |
|             |         |                                                             | -    |
| 208851_s_at | THY1    | Thy-1 cell surface antigen                                  | 2.22 |
|             |         |                                                             | -    |
| 208852_s_at | CANX    | calnexin                                                    | 1.99 |
|             |         |                                                             | -    |
| 208857_s_at | PCMT1   | protein-L-isoaspartate (D-aspartate)<br>O-methyltransferase | 2.43 |
|             |         |                                                             | -    |
| 208872_s_at | REEP5   | receptor accessory protein 5                                | 1.94 |
|             |         |                                                             | -    |
| 208902_s_at | RPS28   | ribosomal protein S28                                       | 1.28 |

|             |         |                                                           |           |
|-------------|---------|-----------------------------------------------------------|-----------|
|             |         |                                                           |           |
| 208907_s_at | MRPS18B | mitochondrial ribosomal protein<br>S18B                   | -<br>1.93 |
| 208926_at   | NEU1    | sialidase 1 (lysosomal sialidase)                         | -2        |
| 208932_at   | PPP4C   | protein phosphatase 4 (formerly X),<br>catalytic subunit  | -<br>1.58 |
| 208939_at   | SEPHS1  | selenophosphate synthetase 1                              | -<br>1.52 |
| 208941_s_at | SEPHS1  | selenophosphate synthetase 1                              | -<br>1.67 |
| 208947_s_at | UPF1    | UPF1 regulator of nonsense<br>transcripts homolog (yeast) | -<br>1.41 |
| 208952_s_at | LARP5   | La ribonucleoprotein domain<br>family, member 5           | -<br>1.41 |

|             |         |                                                                           |           |
|-------------|---------|---------------------------------------------------------------------------|-----------|
| 208959_s_at | TXNDC4  | thioredoxin domain containing 4<br>(endoplasmic reticulum)                | -<br>2.05 |
| 208967_s_at | AK2     | adenylate kinase 2                                                        | -<br>1.47 |
| 208985_s_at | EIF3J   | eukaryotic translation initiation<br>factor 3, subunit J                  | -<br>2.83 |
| 208996_s_at | POLR2C  | polymerase (RNA) II (DNA<br>directed) polypeptide C, 33kDa                | -<br>1.68 |
| 209025_s_at | SYNCRIP | synaptotagmin binding, cytoplasmic<br>RNA interacting protein             | -<br>2.04 |
| 209029_at   | COPS7A  | COP9 constitutive<br>photomorphogenic homolog subunit<br>7A (Arabidopsis) | -<br>1.44 |
| 209038_s_at | EHD1    | EH-domain containing 1                                                    | 1.31      |



|             |        |                                                                      |           |
|-------------|--------|----------------------------------------------------------------------|-----------|
| 209065_at   | UQCRB  | ubiquinol-cytochrome c reductase<br>binding protein                  | -<br>1.82 |
| 209080_x_at | GLRX3  | glutaredoxin 3                                                       | -<br>1.98 |
| 209097_s_at | JAG1   | jagged 1 (Alagille syndrome)                                         | 1.17      |
| 209104_s_at | NOLA2  | nucleolar protein family A, member<br>2 (H/ACA small nucleolar RNPs) | -<br>2.05 |
| 209124_at   | MYD88  | myeloid differentiation primary<br>response gene (88)                | -<br>1.99 |
| 209141_at   | UBE2G1 | ubiquitin-conjugating enzyme E2G<br>1 (UBC7 homolog, yeast)          | -<br>1.81 |
| 209142_s_at | UBE2G1 | ubiquitin-conjugating enzyme E2G<br>1 (UBC7 homolog, yeast)          | -<br>2.16 |

|             |         |                                                                                               |           |
|-------------|---------|-----------------------------------------------------------------------------------------------|-----------|
| 209149_s_at | TM9SF1  | transmembrane 9 superfamily<br>member 1                                                       | -2.4      |
| 209150_s_at | TM9SF1  | transmembrane 9 superfamily<br>member 1                                                       | -<br>1.83 |
| 209160_at   | AKR1C3  | aldo-keto reductase family 1,<br>member C3 (3-alpha hydroxysteroid<br>dehydrogenase, type II) | -<br>2.39 |
| 209175_at   | SEC23IP | SEC23 interacting protein                                                                     | -<br>1.83 |
| 209192_x_at | HTATIP  | HIV-1 Tat interacting protein,<br>60kDa                                                       | -<br>1.42 |
| 209206_at   | SEC22B  | SEC22 vesicle trafficking protein<br>homolog B ( <i>S. cerevisiae</i> )                       | -<br>2.31 |
| 209208_at   | MPDU1   | mannose-P-dolichol utilization<br>defect 1                                                    | -<br>1.94 |
| 209215_at   | TETRAN  | tetracycline transporter-like protein                                                         | 1.48      |

|             |        |                                                                               |           |
|-------------|--------|-------------------------------------------------------------------------------|-----------|
|             |        |                                                                               | -         |
| 209217_s_at | WDR45  | WD repeat domain 45                                                           | 1.95      |
| 209247_s_at | ABCF2  | ATP-binding cassette, sub-family F (GCN20), member 2                          | -<br>1.54 |
| 209262_s_at | NR2F6  | nuclear receptor subfamily 2, group F, member 6                               | -1.9      |
| 209275_s_at | CLN3   | ceroid-lipofuscinosis, neuronal 3, juvenile (Batten, Spielmeier-Vogt disease) | -<br>1.69 |
| 209276_s_at | GLRX   | glutaredoxin (thioltransferase)                                               | -<br>2.54 |
| 209290_s_at | NFIB   | nuclear factor I/B                                                            | 1.83      |
| 209302_at   | POLR2H | polymerase (RNA) II (DNA directed) polypeptide H                              | -<br>1.45 |
| 209316_s_at | HBS1L  | HBS1-like ( <i>S. cerevisiae</i> )                                            | -<br>2.32 |
| 209349_at   | RAD50  | RAD50 homolog ( <i>S. cerevisiae</i> )                                        | -<br>1.33 |

|             |          |                                                                                          |           |
|-------------|----------|------------------------------------------------------------------------------------------|-----------|
| 209354_at   | TNFRSF14 | tumor necrosis factor receptor<br>superfamily, member 14<br>(herpesvirus entry mediator) | 1.71      |
| 209384_at   | PROSC    | proline synthetase co-transcribed<br>homolog (bacterial)                                 | -<br>2.03 |
| 209404_s_at | TMED7    | transmembrane emp24 protein<br>transport domain containing 7                             | -<br>1.85 |
| 209421_at   | MSH2     | mutS homolog 2, colon cancer,<br>nonpolyposis type 1 (E. coli)                           | -<br>1.42 |
| 209434_s_at | PPAT     | phosphoribosyl pyrophosphate<br>amidotransferase                                         | -<br>1.34 |
| 209439_s_at | PHKA2    | phosphorylase kinase, alpha 2<br>(liver)                                                 | -<br>1.74 |
| 209445_x_at | C7orf44  | chromosome 7 open reading frame                                                          | -1.6      |

|             |        |                                                                       |           |
|-------------|--------|-----------------------------------------------------------------------|-----------|
|             |        | 44                                                                    |           |
| 209461_x_at | WDR18  | WD repeat domain 18                                                   | -<br>1.74 |
| 209468_at   | LRP5   | low density lipoprotein receptor-related protein 5                    | -2        |
| 209478_at   | STRA13 | stimulated by retinoic acid 13 homolog (mouse)                        | -<br>1.71 |
| 209482_at   | POP7   | processing of precursor 7, ribonuclease P/MRP subunit (S. cerevisiae) | -<br>2.49 |
| 209506_s_at | NR2F1  | nuclear receptor subfamily 2, group F, member 1                       | 1.63      |
| 209511_at   | POLR2F | polymerase (RNA) II (DNA directed) polypeptide F                      | -1.6      |

|             |         |                                                 |      |
|-------------|---------|-------------------------------------------------|------|
|             |         |                                                 | -    |
| 209535_s_at |         | NA                                              | 1.41 |
| 209552_at   | PAX8    | paired box 8                                    | 1.49 |
|             |         |                                                 | -    |
| 209565_at   | RNF113A | ring finger protein 113A                        | 1.77 |
|             |         |                                                 | -    |
| 209593_s_at | TOR1B   | torsin family 1, member B (torsin B)            | 1.83 |
|             |         |                                                 | -    |
| 209623_at   | MCCC2   | methylcrotonoyl-Coenzyme A carboxylase 2 (beta) | 2.39 |
|             |         |                                                 | -    |
| 209628_at   | NXT2    | nuclear transport factor 2-like export factor 2 | 1.92 |
|             |         |                                                 | -    |
| 209629_s_at | NXT2    | nuclear transport factor 2-like export factor 2 | 1.37 |
|             |         |                                                 | -    |
| 209630_s_at | FBXW2   | F-box and WD repeat domain containing 2         | 2.01 |
|             |         |                                                 | -    |
| 209666_s_at | CHUK    | conserved helix-loop-helix ubiquitous kinase    | 2.36 |

|             |         |                                                                                                      |      |
|-------------|---------|------------------------------------------------------------------------------------------------------|------|
| 209694_at   | PTS     | 6-pyruvoyltetrahydropterin synthase                                                                  | 1.99 |
| 209707_at   | PIGK    | phosphatidylinositol glycan anchor biosynthesis, class K                                             | -2   |
| 209710_at   | GATA2   | GATA binding protein 2                                                                               | 1.36 |
| 209713_s_at | SLC35D1 | solute carrier family 35 (UDP-glucuronic acid/UDP-N-acetylgalactosamine dual transporter), member D1 | 1.94 |
| 209724_s_at | ZFP161  | zinc finger protein 161 homolog (mouse)                                                              | -1.3 |
| 209744_x_at | ITCH    | itchy homolog E3 ubiquitin protein ligase (mouse)                                                    | -1.6 |

|             |        |                                                                              |           |
|-------------|--------|------------------------------------------------------------------------------|-----------|
| 209756_s_at | MYCN   | v-myc myelocytomatosis viral related oncogene, neuroblastoma derived (avian) | 1.47      |
| 209767_s_at | 5-Sep  | septin 5                                                                     | 1.8       |
| 209783_at   | DBP    | D site of albumin promoter (albumin D-box) binding protein                   | 2.64      |
| 209853_s_at | PSME3  | proteasome (prosome, macropain) activator subunit 3 (PA28 gamma; Ki)         | -<br>1.84 |
| 209855_s_at | KLK2   | kallikrein-related peptidase 2                                               | 1.64      |
| 209860_s_at | ANXA7  | annexin A7                                                                   | -<br>1.88 |
| 209886_s_at | SMAD6  | SMAD family member 6                                                         | 1.67      |
| 209889_at   | SEC31B | SEC31 homolog B (S. cerevisiae)                                              | -<br>1.45 |



|             |         |                                                                                   |           |
|-------------|---------|-----------------------------------------------------------------------------------|-----------|
| 209899_s_at | PUF60   | poly-U binding splicing factor<br>60KDa                                           | -<br>1.74 |
| 209927_s_at | C1orf77 | chromosome 1 open reading frame<br>77                                             | 1.49      |
| 209929_s_at | IKBKG   | inhibitor of kappa light polypeptide<br>gene enhancer in B-cells, kinase<br>gamma | -<br>1.79 |
| 210015_s_at | MAP2    | microtubule-associated protein 2                                                  | 1.41      |
| 210089_s_at | LAMA4   | laminin, alpha 4                                                                  | 2.02      |
| 210120_s_at | RANBP3  | RAN binding protein 3                                                             | -<br>1.59 |
| 210126_at   | PSG9    | pregnancy specific beta-1-<br>glycoprotein 9                                      | 1.72      |
| 210128_s_at | LTB4R   | leukotriene B4 receptor                                                           | 1.43      |
| 210159_s_at | TRIM31  | tripartite motif-containing 31                                                    | 1.29      |

|             |        |                                                                                 |           |
|-------------|--------|---------------------------------------------------------------------------------|-----------|
| 210161_at   | NFATC1 | nuclear factor of activated T-cells,<br>cytoplasmic, calcineurin-dependent<br>1 | 1.64      |
| 210178_x_at | FUSIP1 | FUS interacting protein<br>(serine/arginine-rich) 1                             | -<br>2.21 |
| 210182_at   | CORT   | cortistatin                                                                     | 1.83      |
| 210191_s_at | PHTF1  | putative homeodomain transcription<br>factor 1                                  | -1.4      |
| 210208_x_at | BAT3   | HLA-B associated transcript 3                                                   | -<br>1.49 |
| 210216_x_at | RAD1   | RAD1 homolog (S. pombe)                                                         | -<br>1.78 |
| 210223_s_at | MR1    | major histocompatibility complex,<br>class I-related                            | 1.87      |

|             |        |                                                                                                           |           |
|-------------|--------|-----------------------------------------------------------------------------------------------------------|-----------|
| 210226_at   | NR4A1  | nuclear receptor subfamily 4, group A, member 1                                                           | 1.51      |
| 210235_s_at | PPFIA1 | protein tyrosine phosphatase, receptor type, f polypeptide (PTPRF), interacting protein (liprin), alpha 1 | -<br>1.36 |
| 210248_at   | WNT7A  | wingless-type MMTV integration site family, member 7A                                                     | 1.26      |
| 210257_x_at | CUL4B  | cullin 4B                                                                                                 | -<br>1.34 |
| 210263_at   | KCNF1  | potassium voltage-gated channel, subfamily F, member 1                                                    | 1.93      |
| 210266_s_at | TRIM33 | tripartite motif-containing 33                                                                            | 1.86      |
| 210297_s_at | MSMB   | microseminoprotein, beta-                                                                                 | 1.21      |

|             |         |                                                                                                        |           |
|-------------|---------|--------------------------------------------------------------------------------------------------------|-----------|
| 210312_s_at | IFT20   | intraflagellar transport 20 homolog<br>(Chlamydomonas)                                                 | -<br>1.67 |
| 210315_at   | SYN2    | synapsin II                                                                                            | 1.14      |
| 210316_at   | FLT4    | fms-related tyrosine kinase 4                                                                          | 1.28      |
| 210317_s_at | YWHAE   | tyrosine 3-<br>monooxygenase/tryptophan 5-<br>monooxygenase activation protein,<br>epsilon polypeptide | -<br>2.68 |
| 210318_at   | RBP3    | retinol binding protein 3, interstitial                                                                | 1.53      |
| 210329_s_at | SGCD    | sarcoglycan, delta (35kDa<br>dystrophin-associated glycoprotein)                                       | 1.57      |
| 210367_s_at | PTGES   | prostaglandin E synthase                                                                               | 1.46      |
| 210372_s_at | TPD52L1 | tumor protein D52-like 1                                                                               | -<br>2.34 |

|             |        |                                                            |           |
|-------------|--------|------------------------------------------------------------|-----------|
| 210406_s_at | RAB6C  | RAB6C, member RAS oncogene family                          | -<br>1.79 |
| 210417_s_at | PI4KB  | phosphatidylinositol 4-kinase, catalytic, beta             | -1.4      |
| 210431_at   | ALPPL2 | alkaline phosphatase, placental-like 2                     | 1.57      |
| 210456_at   | PCYT1B | phosphate cytidyltransferase 1, choline, beta              | 1.59      |
| 210459_at   | PSMD4  | proteasome (prosome, macropain) 26S subunit, non-ATPase, 4 | 1.47      |
| 210460_s_at | PSMD4  | proteasome (prosome, macropain) 26S subunit, non-ATPase, 4 | -<br>1.57 |
| 210481_s_at | CLEC4M | C-type lectin domain family 4, member M                    | -<br>2.32 |

|             |              |                                                             |           |
|-------------|--------------|-------------------------------------------------------------|-----------|
| 210507_s_at | AVIL         | advillin                                                    | 1.49      |
| 210560_at   | GBX2         | gastrulation brain homeobox 2                               | 1.47      |
| 210588_x_at | HNRPH3       | heterogeneous nuclear<br>ribonucleoprotein H3 (2H9)         | 1.81      |
| 210594_x_at | MPZL1        | myelin protein zero-like 1                                  | -<br>1.28 |
| 210596_at   | RP11-217H1.1 | implantation-associated protein                             | -<br>1.94 |
| 210623_at   | LOC51035     | SAPK substrate protein 1                                    | 1.39      |
| 210625_s_at | AKAP1        | A kinase (PRKA) anchor protein 1                            | -<br>2.04 |
| 210628_x_at | LTBP4        | latent transforming growth factor<br>beta binding protein 4 | 1.44      |
| 210638_s_at | FBXO9        | F-box protein 9                                             | -<br>2.36 |
| 210645_s_at | TTC3         | tetratricopeptide repeat domain 3                           | -<br>1.77 |

|             |        |                                                                                              |           |
|-------------|--------|----------------------------------------------------------------------------------------------|-----------|
| 210678_s_at | AGPAT2 | 1-acylglycerol-3-phosphate O-acyltransferase 2 (lysophosphatidic acid acyltransferase, beta) | -<br>1.58 |
| 210705_s_at | TRIM5  | tripartite motif-containing 5                                                                | -<br>2.14 |
| 210716_s_at | CLIP1  | CAP-GLY domain containing linker protein 1                                                   | -<br>1.73 |
| 210719_s_at | HMG20B | high-mobility group 20B                                                                      | -2.1      |
| 210759_s_at | PSMA1  | proteasome (prosome, macropain) subunit, alpha type, 1                                       | -<br>1.76 |
| 210767_at   | NF2    | neurofibromin 2 (bilateral acoustic neuroma)                                                 | 1.6       |
| 210769_at   | CNGB1  | cyclic nucleotide gated channel beta 1                                                       | 1.47      |

|             |         |                                                                               |           |
|-------------|---------|-------------------------------------------------------------------------------|-----------|
| 210782_x_at | GRIN1   | glutamate receptor, ionotropic, N-methyl D-aspartate 1                        | 1.48      |
| 210798_x_at | MASP2   | mannan-binding lectin serine peptidase 2                                      | -<br>2.58 |
| 210859_x_at | CLN3    | ceroid-lipofuscinosis, neuronal 3, juvenile (Batten, Spielmeyer-Vogt disease) | -<br>1.67 |
| 210867_at   | CNOT4   | CCR4-NOT transcription complex, subunit 4                                     | 1.85      |
| 210927_x_at | JTB     | jumping translocation breakpoint                                              | -1.7      |
| 210932_s_at | RNF6    | ring finger protein (C3H2C3 type) 6                                           | 1.21      |
| 210983_s_at | MCM7    | minichromosome maintenance complex component 7                                | -<br>1.31 |
| 211004_s_at | ALDH3B1 | aldehyde dehydrogenase 3 family, member B1                                    | 1.61      |



|             |        |                                                                                          |           |
|-------------|--------|------------------------------------------------------------------------------------------|-----------|
| 211020_at   | GCNT2  | glucosaminyl (N-acetyl) transferase<br>2, I-branching enzyme (I blood<br>group)          | -<br>1.21 |
| 211021_s_at | RGS14  | regulator of G-protein signaling 14                                                      | 1.85      |
| 211036_x_at | ANAPC5 | anaphase promoting complex<br>subunit 5                                                  | -<br>1.49 |
| 211040_x_at | GTSE1  | G-2 and S-phase expressed 1                                                              | 1.56      |
| 211042_x_at | MCAM   | melanoma cell adhesion molecule                                                          | -<br>1.66 |
| 211045_s_at | KCNH6  | potassium voltage-gated channel,<br>subfamily H (eag-related), member<br>6               | 1.44      |
| 211094_s_at | NF1    | neurofibromin 1<br>(neurofibromatosis, von<br>Recklinghausen disease, Watson<br>disease) | -<br>1.26 |
| 211096_at   | PBX2   | pre-B-cell leukemia homeobox 2                                                           | 1.51      |

|             |         |                                                                            |      |
|-------------|---------|----------------------------------------------------------------------------|------|
|             |         |                                                                            |      |
| 211112_at   | SLC12A4 | solute carrier family 12<br>(potassium/chloride transporters),<br>member 4 | 1.61 |
| 211147_s_at | P2RXL1  | purinergic receptor P2X-like 1,<br>orphan receptor                         | 1.4  |
| 211222_s_at | HAP1    | huntingtin-associated protein 1<br>(neuroan 1)                             | 1.44 |
| 211239_s_at | ADAM7   | ADAM metallopeptidase domain 7                                             | 1.11 |
| 211263_s_at | PCSK6   | proprotein convertase<br>subtilisin/kexin type 6                           | 1.42 |
| 211274_at   | TBX1    | T-box 1                                                                    | 1.4  |
| 211280_s_at | NRF1    | nuclear respiratory factor 1                                               | 1.22 |
| 211300_s_at | TP53    | tumor protein p53 (Li-Fraumeni<br>syndrome)                                | -1.2 |

|             |         |                                                                  |           |
|-------------|---------|------------------------------------------------------------------|-----------|
| 211306_s_at | FCAR    | Fc fragment of IgA, receptor for                                 | 1.24      |
| 211313_s_at | BAZ1B   | bromodomain adjacent to zinc<br>finger domain, 1B                | 1.44      |
| 211315_s_at | CACNA1G | calcium channel, voltage-<br>dependent, T type, alpha 1G subunit | 1.33      |
| 211319_at   |         | NA                                                               | 1.28      |
| 211337_s_at | 76P     | gamma tubulin ring complex<br>protein (76p gene)                 | -<br>1.45 |
| 211358_s_at | CIZ1    | CDKN1A interacting zinc finger<br>protein 1                      | 1.75      |
| 211451_s_at | KCNJ4   | potassium inwardly-rectifying<br>channel, subfamily J, member 4  | 1.27      |
| 211459_at   |         | NA                                                               | 1.11      |
| 211499_s_at | MAPK11  | mitogen-activated protein kinase 11                              | -<br>1.24 |

|             |         |                                                                                               |           |
|-------------|---------|-----------------------------------------------------------------------------------------------|-----------|
| 211518_s_at | BMP4    | bone morphogenetic protein 4                                                                  | -1.4      |
| 211546_x_at | SNCA    | synuclein, alpha (non A4 component of amyloid precursor)                                      | 1.48      |
| 211563_s_at | C19orf2 | chromosome 19 open reading frame 2                                                            | -<br>1.39 |
| 211575_s_at | UBE3A   | ubiquitin protein ligase E3A (human papilloma virus E6-associated protein, Angelman syndrome) | -<br>1.35 |
| 211592_s_at | CACNA1C | calcium channel, voltage-dependent, L type, alpha 1C subunit                                  | 1.15      |
| 211595_s_at | MRPS11  | mitochondrial ribosomal protein S11                                                           | -<br>1.51 |

|             |         |                                                        |           |
|-------------|---------|--------------------------------------------------------|-----------|
| 211596_s_at | LRIG1   | leucine-rich repeats and immunoglobulin-like domains 1 | -<br>2.37 |
| 211612_s_at | IL13RA1 | interleukin 13 receptor, alpha 1                       | -<br>2.47 |
| 211617_at   | ALDOAP2 | aldolase A, fructose-bisphosphate pseudogene 2         | 1.53      |
| 211619_s_at | ALPP    | alkaline phosphatase, placental (Regan isozyme)        | 1.75      |
| 211693_at   | IGHA1   | immunoglobulin heavy constant alpha 1                  | 1.98      |
| 211705_s_at | SORBS1  | sorbin and SH3 domain containing 1                     | 1.62      |
| 211714_x_at | TUBB    | tubulin, beta                                          | -<br>1.71 |
| 211725_s_at | BID     | BH3 interacting domain death agonist                   | -<br>1.66 |

|             |         |                                                                 |           |
|-------------|---------|-----------------------------------------------------------------|-----------|
| 211726_s_at | FMO2    | flavin containing monooxygenase 2<br>(non-functional)           | 2.75      |
| 211746_x_at | PSMA1   | proteasome (prosome, macropain)<br>subunit, alpha type, 1       | -1.5      |
| 211760_s_at | VAMP4   | vesicle-associated membrane<br>protein 4                        | -<br>1.41 |
| 211771_s_at | POU2F2  | POU class 2 homeobox 2                                          | 1.96      |
| 211779_x_at | AP2A2   | adaptor-related protein complex 2,<br>alpha 2 subunit           | -<br>1.53 |
| 211797_s_at | NFYC    | nuclear transcription factor Y,<br>gamma                        | -<br>1.37 |
| 211845_at   | PVRL1   | poliovirus receptor-related 1<br>(herpesvirus entry mediator C) | 1.42      |
| 211873_s_at | PCDHGA9 | protocadherin gamma subfamily A,<br>9                           | -1.3      |

|             |         |                                                                                  |           |
|-------------|---------|----------------------------------------------------------------------------------|-----------|
| 211889_x_at | CEACAM1 | carcinoembryonic antigen-related cell adhesion molecule 1 (biliary glycoprotein) | -<br>1.42 |
| 211898_s_at | EPHB1   | EPH receptor B1                                                                  | -<br>1.24 |
| 211903_s_at | MPL     | myeloproliferative leukemia virus oncogene                                       | 1.36      |
| 211904_x_at | RAD52   | RAD52 homolog ( <i>S. cerevisiae</i> )                                           | 1.81      |
| 211909_x_at | PTGER3  | prostaglandin E receptor 3 (subtype EP3)                                         | 2.61      |
| 211915_s_at | TUBB4Q  | tubulin, beta polypeptide 4, member Q                                            | 1.47      |
| 211953_s_at | RANBP5  | RAN binding protein 5                                                            | -<br>2.22 |
| 211975_at   | ZNF289  | zinc finger protein 289, ID1 regulated                                           | -<br>1.57 |
| 211982_x_at | XPO6    | exportin 6                                                                       | -<br>1.49 |

|             |          |                                                    |      |
|-------------|----------|----------------------------------------------------|------|
|             |          | chromosome 1 open reading frame                    | -    |
| 212005_at   | C1orf144 | 144                                                | 1.93 |
| 212008_at   | UBXD2    | UBX domain containing 2                            | -2.8 |
|             |          |                                                    | -    |
| 212056_at   | KIAA0182 | KIAA0182                                           | 1.41 |
|             |          |                                                    | -    |
| 212108_at   | UBXD8    | UBX domain containing 8                            | 1.64 |
|             |          |                                                    | -    |
| 212116_at   | TRIM27   | tripartite motif-containing 27                     | 1.73 |
|             |          |                                                    | -    |
| 212129_at   | NIPA2    | non imprinted in Prader-Willi/Angelman syndrome 2  | 1.63 |
|             |          |                                                    | -    |
| 212133_at   | NIPA2    | non imprinted in Prader-Willi/Angelman syndrome 2  | 1.35 |
|             |          |                                                    | -    |
| 212159_x_at | AP2A2    | adaptor-related protein complex 2, alpha 2 subunit | 1.53 |
|             |          |                                                    | -    |
| 212164_at   | TMEM183A | transmembrane protein 183A                         | 1.53 |
|             |          |                                                    | -    |
| 212175_s_at | AK2      | adenylate kinase 2                                 | -    |



|             |          |                                                                                                     |           |
|-------------|----------|-----------------------------------------------------------------------------------------------------|-----------|
|             |          |                                                                                                     | 1.96      |
| 212190_at   | SERPINE2 | serpin peptidase inhibitor, clade E<br>(nexin, plasminogen activator<br>inhibitor type 1), member 2 | 2.34      |
| 212194_s_at | TM9SF4   | transmembrane 9 superfamily<br>protein member 4                                                     | -<br>1.94 |
| 212203_x_at | IFITM3   | interferon induced transmembrane<br>protein 3 (1-8U)                                                | -<br>1.88 |
| 212210_at   | INTS1    | integrator complex subunit 1                                                                        | 1.48      |
| 212211_at   | ANKRD17  | ankyrin repeat domain 17                                                                            | -<br>1.75 |
| 212214_at   | OPA1     | optic atrophy 1 (autosomal<br>dominant)                                                             | -1.9      |
| 212216_at   | PREPL    | prolyl endopeptidase-like                                                                           | -<br>1.79 |

|             |        |                                                                |           |
|-------------|--------|----------------------------------------------------------------|-----------|
| 212219_at   | PSME4  | proteasome (prosome, macropain)<br>activator subunit 4         | -1.6      |
| 212228_s_at | COQ9   | coenzyme Q9 homolog (S.<br>cerevisiae)                         | -<br>1.55 |
| 212237_at   | ASXL1  | additional sex combs like 1<br>(Drosophila)                    | -<br>1.53 |
| 212255_s_at | ATP2C1 | ATPase, Ca <sup>++</sup> transporting, type<br>2C, member 1    | -<br>1.62 |
| 212271_at   | MAPK1  | mitogen-activated protein kinase 1                             | -<br>1.78 |
| 212279_at   | TMEM97 | transmembrane protein 97                                       | -<br>2.76 |
| 212285_s_at | AGRN   | agrin                                                          | 1.71      |
| 212296_at   | PSMD14 | proteasome (prosome, macropain)<br>26S subunit, non-ATPase, 14 | -<br>2.27 |

|             |        |                                                                         |           |
|-------------|--------|-------------------------------------------------------------------------|-----------|
| 212302_at   | RTF1   | Rtf1, Paf1/RNA polymerase II complex component, homolog (S. cerevisiae) | -<br>1.34 |
| 212305_s_at | MIA3   | melanoma inhibitory activity family, member 3                           | -<br>2.25 |
| 212309_at   | CLASP2 | cytoplasmic linker associated protein 2                                 | 1.53      |
| 212322_at   | SGPL1  | sphingosine-1-phosphate lyase 1                                         | -<br>1.79 |
| 212329_at   | SCAP   | SREBF chaperone                                                         | -<br>1.99 |
| 212333_at   | FAM98A | family with sequence similarity 98, member A                            | -<br>1.95 |

|             |          |                                                                                                                                           |           |
|-------------|----------|-------------------------------------------------------------------------------------------------------------------------------------------|-----------|
| 212378_at   | GART     | phosphoribosylglycinamide<br>formyltransferase,<br>phosphoribosylglycinamide<br>synthetase,<br>phosphoribosylaminoimidazole<br>synthetase | -2        |
| 212381_at   | USP24    | ubiquitin specific peptidase 24                                                                                                           | -<br>1.39 |
| 212396_s_at | KIAA0090 | KIAA0090                                                                                                                                  | -<br>1.51 |
| 212398_at   | RDX      | radixin                                                                                                                                   | -<br>2.13 |
| 212403_at   | UBE3B    | ubiquitin protein ligase E3B                                                                                                              | -<br>1.33 |
| 212411_at   | IMP4     | IMP4, U3 small nucleolar<br>ribonucleoprotein, homolog (yeast)                                                                            | -<br>2.24 |
| 212432_at   | GRPEL1   | GrpE-like 1, mitochondrial (E. coli)                                                                                                      | -<br>2.16 |

|           |          |                                                 |           |
|-----------|----------|-------------------------------------------------|-----------|
| 212443_at | NBEAL2   | neurobeachin-like 2                             | 1.35      |
| 212484_at | FAM89B   | family with sequence similarity 89,<br>member B | -<br>1.25 |
| 212556_at | SCRIB    | scribbled homolog (Drosophila)                  | -<br>1.74 |
| 212575_at | C19orf6  | chromosome 19 open reading frame<br>6           | 1.87      |
| 212584_at | AQR      | aquarius homolog (mouse)                        | -<br>1.53 |
| 212601_at | ZZEF1    | zinc finger, ZZ-type with EF-hand<br>domain 1   | -<br>1.65 |
| 212622_at | TMEM41B  | transmembrane protein 41B                       | -<br>2.24 |
| 212633_at | KIAA0776 | KIAA0776                                        | -<br>1.93 |
| 212648_at | DHX29    | DEAH (Asp-Glu-Ala-His) box<br>polypeptide 29    | -<br>1.88 |
| 212655_at | ZCCHC14  | zinc finger, CCHC domain<br>containing 14       | -<br>2.56 |

|             |           |                                                                                          |           |
|-------------|-----------|------------------------------------------------------------------------------------------|-----------|
| 212676_at   | NF1       | neurofibromin 1<br>(neurofibromatosis, von<br>Recklinghausen disease, Watson<br>disease) | -<br>1.57 |
| 212680_x_at | LOC644879 | hypothetical LOC644879                                                                   | -<br>1.71 |
| 212685_s_at | TBL2      | transducin (beta)-like 2                                                                 | -<br>1.73 |
| 212691_at   | NUP188    | nucleoporin 188kDa                                                                       | -<br>1.34 |
| 212728_at   | DLG3      | discs, large homolog 3<br>(neuroendocrine-dlg, Drosophila)                               | -<br>1.46 |
| 212754_s_at | MON2      | MON2 homolog ( <i>S. cerevisiae</i> )                                                    | -<br>1.47 |
| 212757_s_at | CAMK2G    | calcium/calmodulin-dependent<br>protein kinase (CaM kinase) II<br>gamma                  | -<br>1.41 |

|             |          |                                                                              |           |
|-------------|----------|------------------------------------------------------------------------------|-----------|
| 212778_at   | PACS2    | phosphofurin acidic cluster sorting protein 2                                | -<br>1.32 |
| 212783_at   | RBBP6    | retinoblastoma binding protein 6                                             | 1.44      |
| 212804_s_at | GAPVD1   | GTPase activating protein and VPS9 domains 1                                 | -<br>1.33 |
| 212814_at   | KIAA0828 | adenosylhomocysteinase 3                                                     | -<br>1.41 |
| 212825_at   | PAXIP1   | PAX interacting (with transcription-activation domain) protein 1             | -<br>1.49 |
| 212830_at   | MEGF9    | multiple EGF-like-domains 9                                                  | -<br>2.53 |
| 212833_at   | SLC25A46 | solute carrier family 25, member 46                                          | -<br>2.53 |
| 212851_at   | DCUN1D4  | DCN1, defective in cullin neddylation 1, domain containing 4 (S. cerevisiae) | -1.4      |

|           |         |                                                                    |           |
|-----------|---------|--------------------------------------------------------------------|-----------|
| 212866_at | R3HCC1  | R3H domain and coiled-coil containing 1                            | -<br>1.44 |
| 212881_at | PIAS4   | protein inhibitor of activated STAT, 4                             | -<br>1.51 |
| 212896_at | SKIV2L2 | superkiller viralicidic activity 2-like 2 ( <i>S. cerevisiae</i> ) | -<br>1.77 |
| 212897_at | CDC2L6  | cell division cycle 2-like 6 (CDK8-like)                           | -<br>1.61 |
| 212900_at | SEC24A  | SEC24 related gene family, member A ( <i>S. cerevisiae</i> )       | -<br>1.92 |
| 212902_at | SEC24A  | SEC24 related gene family, member A ( <i>S. cerevisiae</i> )       | -<br>2.51 |
| 212904_at | LRRC47  | leucine rich repeat containing 47                                  | -<br>1.66 |



|             |          |                                                                        |           |
|-------------|----------|------------------------------------------------------------------------|-----------|
| 212905_at   | CSTF2T   | cleavage stimulation factor, 3' pre-RNA, subunit 2, 64kDa, tau variant | -<br>1.81 |
| 212908_at   | DNAJC16  | DnaJ (Hsp40) homolog, subfamily C, member 16                           | -1.8      |
| 212938_at   | COL6A1   | collagen, type VI, alpha 1                                             | 1.45      |
| 212948_at   | CAMTA2   | calmodulin binding transcription activator 2                           | -<br>1.41 |
| 212955_s_at | POLR2I   | polymerase (RNA) II (DNA directed) polypeptide I, 14.5kDa              | -<br>1.95 |
| 212961_x_at | CXorf40B | chromosome X open reading frame 40B                                    | -<br>1.61 |
| 212964_at   | HIC2     | hypermethylated in cancer 2                                            | -1.3      |
| 212986_s_at | TLK2     | tousled-like kinase 2                                                  | -<br>1.44 |

|             |          |                                                                  |           |
|-------------|----------|------------------------------------------------------------------|-----------|
| 212987_at   | FBXO9    | F-box protein 9                                                  | -<br>2.05 |
| 212995_x_at | FAM128B  | family with sequence similarity<br>128, member B                 | -1.4      |
| 213009_s_at | TRIM37   | tripartite motif-containing 37                                   | -<br>1.54 |
| 213013_at   | MAPK8IP1 | mitogen-activated protein kinase 8<br>interacting protein 1      | 1.58      |
| 213073_at   | ZFYVE26  | zinc finger, FYVE domain<br>containing 26                        | -<br>1.33 |
| 213096_at   | TMCC2    | transmembrane and coiled-coil<br>domain family 2                 | 1.42      |
| 213098_at   | RQCD1    | RCD1 required for cell<br>differentiation1 homolog (S.<br>pombe) | -<br>1.25 |
| 213100_at   |          | NA                                                               | 1.33      |

|             |          |                                                                    |           |
|-------------|----------|--------------------------------------------------------------------|-----------|
| 213113_s_at | SLC43A3  | solute carrier family 43, member 3                                 | -2.2      |
| 213121_at   | SNRP70   | small nuclear ribonucleoprotein<br>70kDa polypeptide (RNP antigen) | 1.66      |
| 213132_s_at | MCAT     | malonyl CoA:ACP acyltransferase<br>(mitochondrial)                 | -<br>1.34 |
| 213155_at   | WSCD1    | WSC domain containing 1                                            | 1.44      |
| 213156_at   |          | NA                                                                 | 2.39      |
| 213166_x_at | FAM128A  | family with sequence similarity<br>128, member A                   | -<br>1.49 |
| 213177_at   | MAPK8IP3 | mitogen-activated protein kinase 8<br>interacting protein 3        | 1.6       |
| 213181_s_at | MOCS1    | molybdenum cofactor synthesis 1                                    | -<br>1.48 |
| 213198_at   | ACVR1B   | activin A receptor, type IB                                        | -<br>1.58 |

|             |          |                                                                            |      |
|-------------|----------|----------------------------------------------------------------------------|------|
| 213200_at   | SYP      | synaptophysin                                                              | 1.64 |
|             |          |                                                                            | -    |
| 213224_s_at | LOC92482 | hypothetical protein LOC92482                                              | 1.62 |
|             |          |                                                                            | -    |
| 213287_s_at | KRT10    | keratin 10 (epidermolytic hyperkeratosis; keratosis palmaris et plantaris) | 2.52 |
|             |          |                                                                            | -    |
| 213289_at   | SATL1    | spermidine/spermine N1-acetyl transferase-like 1                           | 2.11 |
|             |          |                                                                            | -    |
| 213292_s_at | SNX13    | sorting nexin 13                                                           | 1.68 |
|             |          |                                                                            | -    |
| 213302_at   | PFAS     | phosphoribosylformylglycinamidine synthase (FGAR amidotransferase)         | 1.47 |
|             |          |                                                                            | -    |
| 213312_at   | C6orf162 | chromosome 6 open reading frame 162                                        | 1.37 |
|             |          |                                                                            | -    |
| 213315_x_at | CXorf40A | chromosome X open reading frame 40A                                        | 1.86 |
| 213316_at   | KIAA1462 | KIAA1462                                                                   | 1.27 |

|             |          |                                                            |      |
|-------------|----------|------------------------------------------------------------|------|
|             |          |                                                            | -    |
| 213318_s_at | BAT3     | HLA-B associated transcript 3                              | 1.67 |
|             |          |                                                            | -    |
| 213320_at   | PRMT3    | protein arginine methyltransferase 3                       | 1.66 |
|             |          |                                                            | -    |
| 213372_at   | PAQR3    | progesterin and adipoQ receptor<br>family member III       | 1.46 |
|             |          |                                                            | -    |
| 213389_at   | ZNF592   | zinc finger protein 592                                    | 1.34 |
|             |          |                                                            | -    |
| 213427_at   | RPP40    | ribonuclease P/MRP 40kDa subunit                           | 1.53 |
|             |          |                                                            | -    |
| 213463_s_at | KIAA0974 | KIAA0974                                                   | 1.41 |
|             |          |                                                            | -    |
| 213465_s_at | PPP1R7   | protein phosphatase 1, regulatory<br>(inhibitor) subunit 7 | 2.05 |

|             |        |                                                                                                                 |           |
|-------------|--------|-----------------------------------------------------------------------------------------------------------------|-----------|
| 213468_at   | ERCC2  | excision repair cross-complementing rodent repair deficiency, complementation group 2 (xeroderma pigmentosum D) | -1.3      |
| 213490_s_at | MAP2K2 | mitogen-activated protein kinase kinase 2                                                                       | -<br>1.51 |
| 213494_s_at | YY1    | YY1 transcription factor                                                                                        | -<br>1.26 |
| 213500_at   | COPB2  | coatamer protein complex, subunit beta 2 (beta prime)                                                           | -<br>1.27 |
| 213521_at   | PTPN18 | protein tyrosine phosphatase, non-receptor type 18 (brain-derived)                                              | 1.27      |
| 213525_at   |        | NA                                                                                                              | 1.4       |
| 213527_s_at | ZNF688 | zinc finger protein 688                                                                                         | -<br>1.49 |

|             |          |                                                   |           |
|-------------|----------|---------------------------------------------------|-----------|
| 213528_at   | C1orf156 | chromosome 1 open reading frame<br>156            | -<br>1.67 |
| 213529_at   | ZNF688   | zinc finger protein 688                           | 2.09      |
| 213548_s_at | CDV3     | CDV3 homolog (mouse)                              | -<br>1.58 |
| 213595_s_at | CDC42BPA | CDC42 binding protein kinase<br>alpha (DMPK-like) | 1.32      |
| 213621_s_at | GUK1     | guanylate kinase 1                                | 1.3       |
| 213628_at   | CLCC1    | chloride channel CLIC-like 1                      | -<br>1.82 |
| 213637_at   |          | NA                                                | -<br>1.61 |
| 213638_at   | PHACTR1  | phosphatase and actin regulator 1                 | 1.35      |
| 213642_at   |          | NA                                                | -<br>2.33 |
| 213647_at   | DNA2L    | DNA2 DNA replication helicase 2-<br>like (yeast)  | -<br>1.26 |
| 213659_at   | ZNF75    | zinc finger protein 75 (D8C6)                     | -         |

|             |          |                                                  |           |
|-------------|----------|--------------------------------------------------|-----------|
|             |          |                                                  | 1.35      |
| 213669_at   | FCHO1    | FCH domain only 1                                | 1.74      |
| 213696_s_at | MED8     | mediator complex subunit 8                       | -<br>1.62 |
| 213708_s_at | MLX      | MAX-like protein X                               | -<br>1.46 |
| 213711_at   | KRT81    | keratin 81                                       | 1.6       |
| 213715_s_at | ANKRD47  | ankyrin repeat domain 47                         | 1.28      |
| 213734_at   | RFC5     | replication factor C (activator 1) 5,<br>36.5kDa | -<br>3.54 |
| 213741_s_at | KPNA1    | karyopherin alpha 1 (importin alpha<br>5)        | -<br>1.77 |
| 213755_s_at | SKI      | v-ski sarcoma viral oncogene<br>homolog (avian)  | 1.56      |
| 213770_at   | KSR1     | kinase suppressor of ras 1                       | -<br>1.26 |
| 213815_x_at | C19orf29 | chromosome 19 open reading frame<br>29           | -<br>1.26 |



|             |         |                                                             |           |
|-------------|---------|-------------------------------------------------------------|-----------|
|             |         |                                                             | -         |
| 213838_at   | NOL7    | nucleolar protein 7, 27kDa                                  | 1.62      |
| 213853_at   | DPH4    | DPH4, JJJ3 homolog ( <i>S. cerevisiae</i> )                 | -2.2      |
| 213875_x_at | C6orf62 | chromosome 6 open reading frame<br>62                       | -<br>1.93 |
| 213878_at   | PYROXD1 | pyridine nucleotide-disulphide<br>oxidoreductase domain 1   | -<br>2.42 |
| 213892_s_at | APRT    | adenine phosphoribosyltransferase                           | -<br>1.95 |
| 213908_at   | WHDC1L1 | WAS protein homology region 2<br>domain containing 1-like 1 | -<br>1.53 |
| 213945_s_at | NUP210  | nucleoporin 210kDa                                          | -<br>1.26 |
| 213949_s_at | DOHH    | deoxyhypusine<br>hydroxylase/monooxygenase                  | -<br>1.34 |

|             |         |                                                             |      |
|-------------|---------|-------------------------------------------------------------|------|
| 214002_at   | MYL6    | myosin, light chain 6, alkali, smooth muscle and non-muscle | 1.5  |
| 214021_x_at | ITGB5   | integrin, beta 5                                            | 1.21 |
| 214032_at   | ZAP70   | zeta-chain (TCR) associated protein kinase 70kDa            | 1.5  |
| 214054_at   | DOK2    | docking protein 2, 56kDa                                    | 1.57 |
| 214076_at   | GFOD2   | glucose-fructose oxidoreductase domain containing 2         | 1.45 |
| 214122_at   | PDLIM7  | PDZ and LIM domain 7 (enigma)                               | 1.7  |
| 214130_s_at | PDE4DIP | phosphodiesterase 4D interacting protein (myomegalin)       | 2.11 |

|             |           |                                                                                               |           |
|-------------|-----------|-----------------------------------------------------------------------------------------------|-----------|
| 214134_at   | C2orf55   | chromosome 2 open reading frame<br>55                                                         | 1.23      |
| 214140_at   | SLC25A16  | solute carrier family 25<br>(mitochondrial carrier; Graves<br>disease autoantigen), member 16 | -<br>2.32 |
| 214144_at   | POLR2D    | polymerase (RNA) II (DNA<br>directed) polypeptide D                                           | -<br>1.44 |
| 214145_s_at | SPTB      | spectrin, beta, erythrocytic (includes<br>spherocytosis, clinical type I)                     | 1.43      |
| 214151_s_at | CCPG1     | cell cycle progression 1                                                                      | -<br>1.65 |
| 214162_at   | LOC284244 | hypothetical protein LOC284244                                                                | -<br>1.16 |
| 214174_s_at | PDLIM4    | PDZ and LIM domain 4                                                                          | 2.17      |
| 214193_s_at | C1orf107  | chromosome 1 open reading frame<br>107                                                        | -<br>2.31 |

|             |              |                                                                                                           |           |
|-------------|--------------|-----------------------------------------------------------------------------------------------------------|-----------|
| 214205_x_at | GLRX3        | glutaredoxin 3                                                                                            | -1.7      |
| 214210_at   | SLC25A17     | solute carrier family 25<br>(mitochondrial carrier; peroxisomal<br>membrane protein, 34kDa), member<br>17 | -<br>1.29 |
| 214231_s_at | RP11-125A7.3 | KIAA0564 protein                                                                                          | -<br>1.31 |
| 214237_x_at | PAWR         | PRKC, apoptosis, WT1, regulator                                                                           | 1.59      |
| 214255_at   | ATP10A       | ATPase, Class V, type 10A                                                                                 | 1.37      |
| 214257_s_at | SEC22B       | SEC22 vesicle trafficking protein<br>homolog B ( <i>S. cerevisiae</i> )                                   | -<br>1.99 |
| 214292_at   | ITGB4        | integrin, beta 4                                                                                          | 1.38      |
| 214301_s_at | DPYSL4       | dihydropyrimidinase-like 4                                                                                | 1.44      |
| 214303_x_at | MUC5AC       | mucin 5AC, oligomeric mucus/gel-<br>forming                                                               | 1.5       |

|             |         |                                                        |      |
|-------------|---------|--------------------------------------------------------|------|
| 214304_x_at | DMN     | desmuslin                                              | 1.47 |
| 214364_at   | MTERFD2 | MTERF domain containing 2                              | 1.27 |
| 214372_x_at | ERN2    | endoplasmic reticulum to nucleus signaling 2           | 1.5  |
| 214383_x_at | KLHDC3  | kelch domain containing 3                              | 1.56 |
| 214385_s_at | MUC5AC  | mucin 5AC, oligomeric mucus/gel-forming                | 1.35 |
| 214403_x_at | SPDEF   | SAM pointed domain containing ets transcription factor | 1.53 |
| 214442_s_at | PIAS2   | protein inhibitor of activated STAT, 2                 | 1.44 |
| 214462_at   | SOCS6   | suppressor of cytokine signaling 6                     | -1.4 |

|             |          |                                                 |           |
|-------------|----------|-------------------------------------------------|-----------|
| 214484_s_at | OPRS1    | opioid receptor, sigma 1                        | -<br>2.11 |
| 214489_at   | FSHB     | follicle stimulating hormone, beta polypeptide  | -<br>1.25 |
| 214493_s_at | INADL    | InaD-like (Drosophila)                          | 1.64      |
| 214507_s_at | EXOSC2   | exosome component 2                             | -<br>1.47 |
| 214523_at   | CEBPE    | CCAAT/enhancer binding protein (C/EBP), epsilon | 1.64      |
| 214527_s_at | PQBP1    | polyglutamine binding protein 1                 | -<br>1.65 |
| 214536_at   | SLURP1   | secreted LY6/PLAUR domain containing 1          | 1.47      |
| 214541_s_at | QKI      | quaking homolog, KH domain RNA binding (mouse)  | -<br>1.17 |
| 214551_s_at | CD7      | CD7 molecule                                    | 1.42      |
| 214562_at   | HIST1H4L | histone cluster 1, H4l                          | 1.32      |

|             |          |                                                        |      |
|-------------|----------|--------------------------------------------------------|------|
| 214570_x_at | POM121L1 | POM121 membrane glycoprotein-like 1 (rat)              | 1.42 |
| 214594_x_at | ATP8B1   | ATPase, Class I, type 8B, member 1                     | 3.41 |
| 214595_at   | KCNG1    | potassium voltage-gated channel, subfamily G, member 1 | 1.53 |
| 214699_x_at | WIP12    | WD repeat domain, phosphoinositide interacting 2       | 1.42 |
| 214755_at   | UAP1L1   | UDP-N-acetylglucosamine pyrophosphorylase 1-like 1     | 1.19 |
| 214778_at   | MEGF8    | multiple EGF-like-domains 8                            | 1.35 |
| 214816_x_at | C19orf40 | chromosome 19 open reading frame 40                    | 1.59 |
| 214819_at   | IQSEC2   | IQ motif and Sec7 domain 2                             | 1.53 |

|             |           |                                                                                                      |      |
|-------------|-----------|------------------------------------------------------------------------------------------------------|------|
| 214831_at   | MED28     | mediator complex subunit 28                                                                          | -1.3 |
| 214839_at   | LOC157627 | hypothetical protein LOC157627                                                                       | 1.49 |
| 214871_x_at |           | NA                                                                                                   | 1.58 |
| 214883_at   | THRA      | thyroid hormone receptor, alpha<br>(erythroblastic leukemia viral (v-erb-a) oncogene homolog, avian) | 1.4  |
| 214893_x_at | HCN2      | hyperpolarization activated cyclic<br>nucleotide-gated potassium channel<br>2                        | 1.67 |
| 214925_s_at | SPTAN1    | spectrin, alpha, non-erythrocytic 1<br>(alpha-fodrin)                                                | 1.42 |
| 214934_at   | ATP9B     | ATPase, Class II, type 9B                                                                            | -1.4 |
| 214935_at   | NUP62     | nucleoporin 62kDa                                                                                    | 1.53 |
| 214959_s_at | API5      | apoptosis inhibitor 5                                                                                | -    |



|             |           |                                                             |           |
|-------------|-----------|-------------------------------------------------------------|-----------|
|             |           |                                                             | 1.62      |
| 214960_at   | API5      | apoptosis inhibitor 5                                       | 1.49      |
| 214966_at   | GRIK5     | glutamate receptor, ionotropic,<br>kainate 5                | 1.38      |
| 214971_s_at | ST6GAL1   | ST6 beta-galactosamide alpha-2,6-<br>sialyltransferase 1    | -3.1      |
| 214990_at   | PIGO      | phosphatidylinositol glycan anchor<br>biosynthesis, class O | 1.65      |
| 215013_s_at | USP34     | ubiquitin specific peptidase 34                             | 1.38      |
| 215030_at   | GRSF1     | G-rich RNA sequence binding<br>factor 1                     | -<br>1.38 |
| 215059_at   | C4orf31   | chromosome 4 open reading frame<br>31                       | 1.24      |
| 215061_at   | LOC399818 | similar to CG9643-PA                                        | 1.5       |
| 215158_s_at | DEDD      | death effector domain containing                            | -<br>1.36 |

|             |          |                                                                                                            |           |
|-------------|----------|------------------------------------------------------------------------------------------------------------|-----------|
| 215165_x_at | UMPS     | uridine monophosphate synthetase<br>(orotate phosphoribosyl transferase<br>and orotidine-5'-decarboxylase) | -<br>1.53 |
| 215171_s_at | TIMM17A  | translocase of inner mitochondrial<br>membrane 17 homolog A (yeast)                                        | -<br>2.16 |
| 215187_at   | FLJ11292 | hypothetical protein FLJ11292                                                                              | 1.23      |
| 215205_x_at | NCOR2    | nuclear receptor co-repressor 2                                                                            | 1.47      |
| 215243_s_at | GJB3     | gap junction protein, beta 3, 31kDa                                                                        | 1.33      |
| 215262_at   | OXNAD1   | oxidoreductase NAD-binding<br>domain containing 1                                                          | -<br>1.14 |
| 215265_at   | EMX1     | empty spiracles homeobox 1                                                                                 | 1.38      |

|             |         |                                                      |      |
|-------------|---------|------------------------------------------------------|------|
| 215348_at   | ADCY1   | adenylate cyclase 1 (brain)                          | 1.31 |
| 215354_s_at | PELP1   | proline, glutamic acid and leucine<br>rich protein 1 | 1.82 |
| 215384_s_at | MAP1A   | microtubule-associated protein 1A                    | 1.93 |
| 215410_at   | PMS2L2  | postmeiotic segregation increased<br>2-like 2        | 1.72 |
| 215436_at   | HSDL2   | hydroxysteroid dehydrogenase like<br>2               | -1.5 |
| 215490_at   | C1orf69 | chromosome 1 open reading frame<br>69                | 1.28 |
| 215502_at   |         | NA                                                   | 1.62 |

|             |         |                                                                                                           |      |
|-------------|---------|-----------------------------------------------------------------------------------------------------------|------|
| 215527_at   | KHDRBS2 | KH domain containing, RNA binding, signal transduction associated 2                                       | 1.26 |
| 215538_at   | LARGE   | like-glycosyltransferase                                                                                  | 1.67 |
| 215548_s_at | SCFD1   | sec1 family domain containing 1                                                                           | 1.87 |
| 215560_x_at | MTRF1L  | mitochondrial translational release factor 1-like                                                         | 1.52 |
| 215594_at   |         | NA                                                                                                        | 1.49 |
| 215609_at   | STARD7  | StAR-related lipid transfer (START) domain containing 7                                                   | 1.54 |
| 215632_at   | NEUROG2 | neurogenin 2                                                                                              | 1.21 |
| 215677_s_at | BRF1    | BRF1 homolog, subunit of RNA polymerase III transcription initiation factor IIIB ( <i>S. cerevisiae</i> ) | 1.36 |

|             |         |                                                        |           |
|-------------|---------|--------------------------------------------------------|-----------|
| 215685_s_at | DLX2    | distal-less homeobox 2                                 | 1.65      |
| 215718_s_at | PHF3    | PHD finger protein 3                                   | 1.83      |
| 215744_at   | FUS     | fusion (involved in t(12;16) in malignant liposarcoma) | 1.21      |
| 215759_at   | ANKRD53 | ankyrin repeat domain 53                               | 1.75      |
| 215778_x_at | HAB1    | B1 for mucin                                           | 1.81      |
| 215827_x_at | CROCCL2 | ciliary rootlet coiled-coil, rootletin-like 2          | 1.53      |
| 215834_x_at | UBC     | ubiquitin C                                            | -         |
| 215869_at   | ABCA1   | ATP-binding cassette, sub-family A (ABC1), member 1    | 1.46      |
| 215892_at   | ZNF440  | zinc finger protein 440                                | 1.19      |
| 215923_s_at | PSD4    | pleckstrin and Sec7 domain containing 4                | -<br>1.71 |

|             |          |                                                             |      |
|-------------|----------|-------------------------------------------------------------|------|
| 215935_at   | FAM75A3  | family with sequence similarity 75,<br>member A3            | 1.22 |
| 215942_s_at | GTSE1    | G-2 and S-phase expressed 1                                 | 1.42 |
| 215952_s_at | OAZ1     | ornithine decarboxylase antizyme 1                          | 1.99 |
| 215972_at   | PART1    | prostate androgen-regulated<br>transcript 1                 | 1.48 |
| 216019_x_at | PHLDB1   | pleckstrin homology-like domain,<br>family B, member 1      | 1.39 |
| 216023_at   | JMJD2B   | jumonji domain containing 2B                                | 1.35 |
| 216137_s_at | MAPK8IP3 | mitogen-activated protein kinase 8<br>interacting protein 3 | 1.44 |
| 216139_s_at | MAPK8IP3 | mitogen-activated protein kinase 8<br>interacting protein 3 | 1.34 |
| 216151_at   |          | NA                                                          | 1.1  |

|             |          |                                                                                           |           |
|-------------|----------|-------------------------------------------------------------------------------------------|-----------|
| 216206_x_at | MAP2K7   | mitogen-activated protein kinase<br>kinase 7                                              | 2.42      |
| 216220_s_at | ADORA1   | adenosine A1 receptor                                                                     | 1.83      |
| 216234_s_at | PRKACA   | protein kinase, cAMP-dependent,<br>catalytic, alpha                                       | -<br>1.18 |
| 216253_s_at | PARVB    | parvin, beta                                                                              | 1.92      |
| 216266_s_at | ARFGEF1  | ADP-ribosylation factor guanine<br>nucleotide-exchange factor<br>1(brefeldin A-inhibited) | -<br>1.56 |
| 216290_x_at | DPP6     | dipeptidyl-peptidase 6                                                                    | 1.46      |
| 216294_s_at | KIAA1109 | KIAA1109                                                                                  | -1.2      |
| 216325_x_at | RTEL1    | regulator of telomere elongation<br>helicase 1                                            | 1.54      |

|             |           |                                                                                               |           |
|-------------|-----------|-----------------------------------------------------------------------------------------------|-----------|
| 216334_s_at | CYP2A7P1  | cytochrome P450, family 2,<br>subfamily A, polypeptide 7<br>pseudogene 1                      | 1.61      |
| 216338_s_at | YIPF3     | Yip1 domain family, member 3                                                                  | -<br>1.58 |
| 216358_at   | LOC442233 | similar to SWI/SNF-related matrix-<br>associated actin-dependent regulator<br>of chromatin e1 | 1.89      |
| 216395_at   | FBXL18    | F-box and leucine-rich repeat<br>protein 18                                                   | 1.59      |
| 216450_x_at | HSP90B1   | heat shock protein 90kDa beta<br>(Grp94), member 1                                            | -<br>2.47 |
| 216521_s_at | BRCC3     | BRCA1/BRCA2-containing<br>complex, subunit 3                                                  | -1.3      |



|             |           |                                                                                                                                                                                          |           |
|-------------|-----------|------------------------------------------------------------------------------------------------------------------------------------------------------------------------------------------|-----------|
| 216559_x_at | LOC120364 | similar to Heterogeneous nuclear ribonucleoprotein A1 (Helix-destabilizing protein) (Single-strand binding protein) (hnRNP core protein A1) (HDP-1) (Topoisomerase-inhibitor suppressed) | 1.68      |
| 216595_at   | FLJ13236  | hypothetical protein FLJ13236                                                                                                                                                            | -<br>1.26 |
| 216602_s_at | FARSA     | phenylalanyl-tRNA synthetase, alpha subunit                                                                                                                                              | -<br>1.49 |
| 216617_s_at | MAG       | myelin associated glycoprotein                                                                                                                                                           | 1.6       |
| 216645_at   | TCF3      | transcription factor 3 (E2A immunoglobulin enhancer binding factors E12/E47)                                                                                                             | 1.4       |

|             |       |                                                                                                                                            |           |
|-------------|-------|--------------------------------------------------------------------------------------------------------------------------------------------|-----------|
| 216652_s_at | DR1   | down-regulator of transcription 1,<br>TBP-binding (negative cofactor 2)                                                                    | -<br>1.68 |
| 216656_at   |       | NA                                                                                                                                         | 1.46      |
| 216707_at   | PCDH9 | protocadherin 9                                                                                                                            | 1.46      |
| 216716_at   | ABO   | ABO blood group (transferase A,<br>alpha 1-3-N-<br>acetylgalactosaminyltransferase;<br>transferase B, alpha 1-3-<br>galactosyltransferase) | 1.38      |
| 216724_at   | DCLK2 | doublecortin-like kinase 2                                                                                                                 | 1.22      |
| 216747_at   | APBB2 | amyloid beta (A4) precursor<br>protein-binding, family B, member<br>2 (Fe65-like)                                                          | 1.71      |
| 216789_at   |       | NA                                                                                                                                         | 1.85      |
| 216797_at   |       | NA                                                                                                                                         | 1.2       |

|             |          |                                                                                |           |
|-------------|----------|--------------------------------------------------------------------------------|-----------|
| 216808_at   | KRT18P27 | keratin 27 pseudogene 27                                                       | 1.41      |
| 216831_s_at | RUNX1T1  | runt-related transcription factor 1;<br>translocated to, 1 (cyclin D-related)  | 1.59      |
| 216835_s_at | DOK1     | docking protein 1, 62kDa<br>(downstream of tyrosine kinase 1)                  | 1.7       |
| 216837_at   | EPHA5    | EPH receptor A5                                                                | -<br>1.14 |
| 216843_x_at | PMS2L1   | postmeiotic segregation increased<br>2-like 1                                  | -<br>1.54 |
| 216855_s_at | HNRNPU   | heterogeneous nuclear<br>ribonucleoprotein U (scaffold<br>attachment factor A) | 1.56      |
| 216873_s_at | ATP8B2   | ATPase, Class I, type 8B, member 2                                             | 1.42      |
| 216875_x_at | HAB1     | B1 for mucin                                                                   | 1.95      |

|             |         |                                                         |      |
|-------------|---------|---------------------------------------------------------|------|
| 216888_at   | LDB3    | LIM domain binding 3                                    | 1.37 |
| 216911_s_at | HIC2    | hypermethylated in cancer 2                             | 1.45 |
| 216935_at   | C1orf46 | chromosome 1 open reading frame<br>46                   | 1.34 |
| 216975_x_at | NPAS1   | neuronal PAS domain protein 1                           | 1.5  |
| 217046_s_at | AGER    | advanced glycosylation end<br>product-specific receptor | 1.46 |
| 217054_at   | MUC3A   | mucin 3A, cell surface associated                       | 1.58 |
| 217055_x_at |         | NA                                                      | 1.75 |
| 217062_at   | DMPK    | dystrophia myotonica-protein<br>kinase                  | 1.54 |
| 217067_s_at | DMP1    | dentin matrix acidic phosphoprotein                     | 1.23 |
| 217071_s_at | MTHFR   | 5,10-methylenetetrahydrofolate<br>reductase (NADPH)     | 1.61 |

|             |         |                                                        |      |
|-------------|---------|--------------------------------------------------------|------|
| 217077_s_at | GABBR2  | gamma-aminobutyric acid (GABA)<br>B receptor, 2        | 1.43 |
| 217081_at   | OR2H2   | olfactory receptor, family 2,<br>subfamily H, member 2 | 1.3  |
| 217101_at   | C1orf34 | chromosome 1 open reading frame<br>34                  | 1.59 |
| 217141_at   | BTBD7   | BTB (POZ) domain containing 7                          | 1.36 |
| 217163_at   | ESR1    | estrogen receptor 1                                    | 1.22 |
| 217182_at   | MUC5AC  | mucin 5AC, oligomeric mucus/gel-<br>forming            | 1.85 |
| 217190_x_at | ESR1    | estrogen receptor 1                                    | 2.51 |

|             |        |                                                                                   |           |
|-------------|--------|-----------------------------------------------------------------------------------|-----------|
|             |        | src kinase associated                                                             |           |
| 217217_at   | SKAP2  | phosphoprotein 2                                                                  | 1.37      |
| 217225_x_at | NOMO2  | NODAL modulator 2                                                                 | -1.9      |
| 217264_s_at | SCNN1A | sodium channel, nonvoltage-gated 1<br>alpha                                       | 1.71      |
| 217278_x_at | SHOX2  | short stature homeobox 2                                                          | 1.44      |
| 217283_at   | SHOX2  | short stature homeobox 2                                                          | 1.51      |
| 217314_at   |        | NA                                                                                | 1.41      |
| 217322_x_at |        | NA                                                                                | 2.12      |
| 217325_at   | KRT3   | keratin 3                                                                         | 2.09      |
| 217389_s_at | ATF5   | activating transcription factor 5                                                 | 1.6       |
| 217401_at   |        | NA                                                                                | 1.41      |
| 217427_s_at | HIRA   | HIR histone cell cycle regulation<br>defective homolog A ( <i>S. cerevisiae</i> ) | -<br>2.29 |
| 217446_x_at |        | NA                                                                                | 2.01      |

|             |           |                                                                                                          |           |
|-------------|-----------|----------------------------------------------------------------------------------------------------------|-----------|
| 217461_x_at | BTF3      | basic transcription factor 3                                                                             | 1.31      |
| 217462_at   | C11orf9   | chromosome 11 open reading frame<br>9                                                                    | 1.32      |
| 217466_x_at | LOC400963 | hypothetical gene supported by<br>AB082925; BC019021;<br>NM_002952                                       | -<br>1.28 |
| 217476_at   | THRA      | thyroid hormone receptor, alpha<br>(erythroblastic leukemia viral (v-<br>erb-a) oncogene homolog, avian) | 1.18      |
| 217481_x_at | FLJ45455  | FLJ45455 protein                                                                                         | -<br>1.14 |
| 217497_at   | ECGF1     | endothelial cell growth factor 1<br>(platelet-derived)                                                   | 1.53      |

|           |           |                                                                |           |
|-----------|-----------|----------------------------------------------------------------|-----------|
| 217502_at | IFIT2     | interferon-induced protein with<br>tetratricopeptide repeats 2 | -<br>1.26 |
| 217506_at | LOC400642 | hypothetical gene supported by<br>BC041875; BX648984           | -<br>1.99 |
| 217510_at | CRX       | cone-rod homeobox                                              | 1.47      |
| 217573_at | GRIN2C    | glutamate receptor, ionotropic, N-<br>methyl D-aspartate 2C    | 1.54      |
| 217592_at | ZSWIM1    | zinc finger, SWIM-type containing<br>1                         | -<br>1.25 |
| 217596_at | UPF3A     | UPF3 regulator of nonsense<br>transcripts homolog A (yeast)    | 1.21      |



|             |         |                                                                           |           |
|-------------|---------|---------------------------------------------------------------------------|-----------|
| 217597_x_at | RAB40B  | RAB40B, member RAS oncogene family                                        | 2         |
| 217625_x_at |         | NA                                                                        | -<br>1.87 |
| 217648_at   | RWDD3   | RWD domain containing 3                                                   | -<br>1.18 |
| 217660_at   | MYH14   | myosin, heavy chain 14                                                    | 1.85      |
| 217685_at   | SLC16A3 | solute carrier family 16, member 3<br>(monocarboxylic acid transporter 4) | 2.24      |
| 217702_at   | IL27RA  | interleukin 27 receptor, alpha                                            | 2.05      |
| 217725_x_at | SERBP1  | SERPINE1 mRNA binding protein 1                                           | -2.2      |
| 217726_at   | COPZ1   | coatamer protein complex, subunit zeta 1                                  | -<br>1.65 |
| 217735_s_at | EIF2AK1 | eukaryotic translation initiation factor 2-alpha kinase 1                 | -1.3      |

|             |          |                                                                       |           |
|-------------|----------|-----------------------------------------------------------------------|-----------|
| 217754_at   | DDX56    | DEAD (Asp-Glu-Ala-Asp) box polypeptide 56                             | -<br>1.57 |
| 217755_at   | HN1      | hematological and neurological expressed 1                            | -<br>1.66 |
| 217790_s_at | SSR3     | signal sequence receptor, gamma (translocon-associated protein gamma) | -<br>2.64 |
| 217800_s_at | NDFIP1   | Nedd4 family interacting protein 1                                    | -<br>1.63 |
| 217811_at   | SELT     | selenoprotein T                                                       | -<br>2.24 |
| 217832_at   | SYNCRIP  | synaptotagmin binding, cytoplasmic RNA interacting protein            | -2.2      |
| 217835_x_at | C20orf24 | chromosome 20 open reading frame 24                                   | -<br>1.91 |
| 217840_at   | DDX41    | DEAD (Asp-Glu-Ala-Asp) box polypeptide 41                             | -<br>1.57 |

|             |          |                                                         |           |
|-------------|----------|---------------------------------------------------------|-----------|
|             |          |                                                         | -         |
| 217856_at   | RBM8A    | RNA binding motif protein 8A                            | 1.45      |
| 217859_s_at | SLC39A9  | solute carrier family 39 (zinc transporter), member 9   | -1.3      |
| 217861_s_at | PREB     | prolactin regulatory element binding                    | -<br>2.57 |
| 217876_at   | GTF3C5   | general transcription factor IIIC, polypeptide 5, 63kDa | -<br>1.34 |
| 217879_at   | CDC27    | cell division cycle 27 homolog (S. cerevisiae)          | -<br>1.95 |
| 217898_at   | C15orf24 | chromosome 15 open reading frame 24                     | -<br>1.71 |
| 217907_at   | MRPL18   | mitochondrial ribosomal protein L18                     | -<br>1.83 |
| 217910_x_at | MLX      | MAX-like protein X                                      | -<br>1.48 |

|             |          |                                                                        |           |
|-------------|----------|------------------------------------------------------------------------|-----------|
| 217919_s_at | MRPL42   | mitochondrial ribosomal protein<br>L42                                 | -<br>2.27 |
| 217920_at   | MAN1A2   | mannosidase, alpha, class 1A,<br>member 2                              | -<br>1.61 |
| 217923_at   | PEF1     | penta-EF-hand domain containing 1                                      | -<br>1.47 |
| 217927_at   | SPCS1    | signal peptidase complex subunit 1<br>homolog ( <i>S. cerevisiae</i> ) | -<br>1.69 |
| 217934_x_at | STUB1    | STIP1 homology and U-box<br>containing protein 1                       | -<br>1.31 |
| 217961_at   | SLC25A38 | solute carrier family 25, member 38                                    | -1.6      |
| 217968_at   | TSSC1    | tumor suppressing subtransferable<br>candidate 1                       | -<br>1.37 |

|             |         |                                                                                      |           |
|-------------|---------|--------------------------------------------------------------------------------------|-----------|
| 217978_s_at | UBE2Q1  | ubiquitin-conjugating enzyme E2Q<br>(putative) 1                                     | -<br>1.94 |
| 218001_at   | MRPS2   | mitochondrial ribosomal protein S2                                                   | -<br>1.49 |
| 218008_at   | C7orf42 | chromosome 7 open reading frame<br>42                                                | -<br>1.89 |
| 218014_at   | NUP85   | nucleoporin 85kDa                                                                    | -<br>1.47 |
| 218016_s_at | POLR3E  | polymerase (RNA) III (DNA<br>directed) polypeptide E (80kD)                          | -<br>1.87 |
| 218020_s_at | ZFAND3  | zinc finger, AN1-type domain 3                                                       | -<br>1.62 |
| 218028_at   | ELOVL1  | elongation of very long chain fatty<br>acids (FEN1/Elo2, SUR4/Elo3,<br>yeast)-like 1 | -<br>1.51 |
| 218050_at   | UFM1    | ubiquitin-fold modifier 1                                                            | -<br>1.66 |

|             |           |                                                               |      |
|-------------|-----------|---------------------------------------------------------------|------|
| 218052_s_at | ATP13A1   | ATPase type 13A1                                              | -1.6 |
|             |           |                                                               | -    |
| 218057_x_at | COX4NB    | COX4 neighbor                                                 | 1.95 |
|             |           |                                                               | -    |
| 218059_at   | ZNF706    | zinc finger protein 706                                       | 1.55 |
|             |           |                                                               | -    |
| 218074_at   | FAM96B    | family with sequence similarity 96,<br>member B               | 1.87 |
|             |           |                                                               | -    |
| 218080_x_at | FAF1      | Fas (TNFRSF6) associated factor 1                             | 1.42 |
|             |           |                                                               | -    |
| 218097_s_at | CUEDC2    | CUE domain containing 2                                       | 1.81 |
|             |           |                                                               | -    |
| 218098_at   |           | NA                                                            | 2.02 |
|             |           |                                                               | -    |
| 218108_at   | C14orf130 | chromosome 14 open reading frame<br>130                       | 1.81 |
|             |           |                                                               | -    |
| 218112_at   | MRPS34    | mitochondrial ribosomal protein<br>S34                        | 1.45 |
|             |           |                                                               | -    |
| 218133_s_at | NIF3L1    | NIF3 NGG1 interacting factor 3-<br>like 1 ( <i>S. pombe</i> ) | 1.73 |

|             |           |                                                                |           |
|-------------|-----------|----------------------------------------------------------------|-----------|
| 218137_s_at | SMAP1     | stromal membrane-associated<br>protein 1                       | -<br>1.57 |
| 218138_at   | MKKS      | McKusick-Kaufman syndrome                                      | -<br>1.75 |
| 218139_s_at | C14orf108 | chromosome 14 open reading frame<br>108                        | -<br>2.08 |
| 218143_s_at | SCAMP2    | secretory carrier membrane protein<br>2                        | -1.4      |
| 218163_at   | MCTS1     | malignant T cell amplified sequence<br>1                       | -<br>2.18 |
| 218169_at   | VAC14     | Vac14 homolog ( <i>S. cerevisiae</i> )                         | -<br>1.72 |
| 218179_s_at | FLJ12716  | FLJ12716 protein                                               | -<br>1.67 |
| 218193_s_at | GOLT1B    | golgi transport 1 homolog B ( <i>S.</i><br><i>cerevisiae</i> ) | -2.8      |

|             |          |                                                                                                                 |           |
|-------------|----------|-----------------------------------------------------------------------------------------------------------------|-----------|
| 218203_at   | ALG5     | asparagine-linked glycosylation 5 homolog ( <i>S. cerevisiae</i> , dolichyl-phosphate beta-glucosyltransferase) | -<br>1.91 |
| 218209_s_at | P15RS    | hypothetical protein FLJ10656                                                                                   | -<br>1.84 |
| 218211_s_at | MLPH     | melanophilin                                                                                                    | -<br>1.78 |
| 218220_at   | C12orf10 | chromosome 12 open reading frame 10                                                                             | -<br>1.64 |
| 218227_at   | NUBP2    | nucleotide binding protein 2 (MinD homolog, <i>E. coli</i> )                                                    | -<br>1.83 |
| 218249_at   | ZDHHC6   | zinc finger, DHHC-type containing 6                                                                             | -<br>1.48 |
| 218260_at   | C19orf58 | chromosome 19 open reading frame 58                                                                             | -<br>2.01 |
| 218264_at   | BCCIP    | BRCA2 and CDKN1A interacting protein                                                                            | -<br>1.98 |



|             |          |                                                                  |           |
|-------------|----------|------------------------------------------------------------------|-----------|
| 218270_at   | MRPL24   | mitochondrial ribosomal protein<br>L24                           | -<br>1.67 |
| 218278_at   | WDR74    | WD repeat domain 74                                              | 1.64      |
| 218281_at   | MRPL48   | mitochondrial ribosomal protein<br>L48                           | -<br>1.67 |
| 218295_s_at | NUP50    | nucleoporin 50kDa                                                | -<br>1.36 |
| 218297_at   | C10orf97 | chromosome 10 open reading frame<br>97                           | -<br>1.51 |
| 218302_at   | PSENEN   | presenilin enhancer 2 homolog (C.<br>elegans)                    | -1.7      |
| 218316_at   | TIMM9    | translocase of inner mitochondrial<br>membrane 9 homolog (yeast) | -<br>1.47 |
| 218317_x_at | GIYD2    | GIY-YIG domain containing 2                                      | -<br>1.71 |
| 218327_s_at | SNAP29   | synaptosomal-associated protein,<br>29kDa                        | -<br>1.82 |

|             |        |                                                                                       |           |
|-------------|--------|---------------------------------------------------------------------------------------|-----------|
| 218328_at   | COQ4   | coenzyme Q4 homolog (S. cerevisiae)                                                   | -<br>1.36 |
| 218329_at   | PRDM4  | PR domain containing 4                                                                | 1.3       |
| 218333_at   | DERL2  | Der1-like domain family, member 2                                                     | -<br>2.06 |
| 218339_at   | MRPL22 | mitochondrial ribosomal protein L22                                                   | -<br>1.76 |
| 218343_s_at | GTF3C3 | general transcription factor IIIC, polypeptide 3, 102kDa                              | -1.6      |
| 218352_at   | RCBTB1 | regulator of chromosome condensation (RCC1) and BTB (POZ) domain containing protein 1 | -2        |
| 218359_at   | NRSN2  | neurensin 2                                                                           | -<br>1.28 |

|             |         |                                                                |           |
|-------------|---------|----------------------------------------------------------------|-----------|
| 218375_at   | NUDT9   | nudix (nucleoside diphosphate linked moiety X)-type motif 9    | -<br>1.82 |
| 218388_at   | PGLS    | 6-phosphogluconolactonase                                      | -<br>1.56 |
| 218398_at   | MRPS30  | mitochondrial ribosomal protein S30                            | -<br>2.43 |
| 218408_at   | TIMM10  | translocase of inner mitochondrial membrane 10 homolog (yeast) | -<br>1.49 |
| 218415_at   | VPS33B  | vacuolar protein sorting 33 homolog B (yeast)                  | -<br>1.34 |
| 218423_x_at | VPS54   | vacuolar protein sorting 54 homolog (S. cerevisiae)            | -<br>1.89 |
| 218439_s_at | COMMD10 | COMM domain containing 10                                      | -<br>1.63 |
| 218455_at   | NFS1    | NFS1 nitrogen fixation 1 homolog (S. cerevisiae)               | -<br>1.52 |

|             |          |                                                          |           |
|-------------|----------|----------------------------------------------------------|-----------|
| 218458_at   | GMCL1    | germ cell-less homolog 1<br>(Drosophila)                 | -<br>1.72 |
| 218460_at   | HEATR2   | HEAT repeat containing 2                                 | -<br>1.52 |
| 218474_s_at | KCTD5    | potassium channel tetramerisation<br>domain containing 5 | -<br>1.68 |
| 218493_at   | C16orf33 | chromosome 16 open reading frame<br>33                   | -<br>1.65 |
| 218496_at   | RNASEH1  | ribonuclease H1                                          | -<br>1.87 |
| 218497_s_at | RNASEH1  | ribonuclease H1                                          | -<br>1.61 |
| 218512_at   | WDR12    | WD repeat domain 12                                      | -<br>1.81 |
| 218519_at   | SLC35A5  | solute carrier family 35, member A5                      | -<br>1.83 |
| 218526_s_at | RANGRF   | RAN guanine nucleotide release<br>factor                 | -<br>1.34 |
| 218527_at   | APTX     | aprataxin                                                | -         |

|             |              |                                                                  |           |
|-------------|--------------|------------------------------------------------------------------|-----------|
|             |              |                                                                  | 1.43      |
| 218534_s_at | AGGF1        | angiogenic factor with G patch and FHA domains 1                 | -<br>1.86 |
| 218536_at   | MRS2L        | MRS2-like, magnesium homeostasis factor ( <i>S. cerevisiae</i> ) | -<br>1.47 |
| 218538_s_at | MRS2L        | MRS2-like, magnesium homeostasis factor ( <i>S. cerevisiae</i> ) | -<br>1.42 |
| 218551_at   | RP5-1077B9.4 | invasion inhibitory protein 45                                   | 1.69      |
| 218558_s_at | MRPL39       | mitochondrial ribosomal protein L39                              | -<br>1.87 |
| 218562_s_at | TMEM57       | transmembrane protein 57                                         | -<br>1.67 |
| 218567_x_at | DPP3         | dipeptidyl-peptidase 3                                           | -1.6      |
| 218580_x_at | AURKAIP1     | aurora kinase A interacting protein 1                            | -<br>1.61 |

|             |          |                                                              |           |
|-------------|----------|--------------------------------------------------------------|-----------|
|             |          |                                                              |           |
| 218593_at   | RBM28    | RNA binding motif protein 28                                 | -1.4      |
| 218594_at   | HEATR1   | HEAT repeat containing 1                                     | -<br>1.83 |
| 218600_at   | LIMD2    | LIM domain containing 2                                      | 1.48      |
| 218605_at   | TFB2M    | transcription factor B2,<br>mitochondrial                    | -<br>2.31 |
| 218607_s_at | SDAD1    | SDA1 domain containing 1                                     | -<br>1.52 |
| 218615_s_at | TMEM39A  | transmembrane protein 39A                                    | -<br>1.79 |
| 218661_at   | FLJ14154 | hypothetical protein FLJ14154                                | -<br>1.72 |
| 218673_s_at | ATG7     | ATG7 autophagy related 7 homolog<br>( <i>S. cerevisiae</i> ) | -<br>1.44 |
| 218674_at   | FLJ13611 | hypothetical protein FLJ13611                                | -<br>2.07 |

|             |          |                                                                       |           |
|-------------|----------|-----------------------------------------------------------------------|-----------|
| 218715_at   | UTP6     | UTP6, small subunit (SSU)<br>processome component, homolog<br>(yeast) | -<br>1.61 |
| 218722_s_at | CCDC51   | coiled-coil domain containing 51                                      | -<br>1.72 |
| 218751_s_at | FBXW7    | F-box and WD repeat domain<br>containing 7                            | 1.57      |
| 218754_at   | NOL9     | nucleolar protein 9                                                   | -<br>1.37 |
| 218760_at   | COQ6     | coenzyme Q6 homolog,<br>monooxygenase ( <i>S. cerevisiae</i> )        | -<br>1.57 |
| 218767_at   | REXO4    | REX4, RNA exonuclease 4<br>homolog ( <i>S. cerevisiae</i> )           | -1.4      |
| 218789_s_at | C11orf71 | chromosome 11 open reading frame<br>71                                | -<br>2.23 |
| 218794_s_at | TXNL4B   | thioredoxin-like 4B                                                   | -         |

|             |          |                                                               |           |
|-------------|----------|---------------------------------------------------------------|-----------|
|             |          |                                                               | 1.55      |
| 218863_s_at | TNS1     | tensin 1                                                      | 2.13      |
| 218868_at   | ACTR3B   | ARP3 actin-related protein 3<br>homolog B (yeast)             | -<br>1.34 |
| 218877_s_at | TRMT11   | tRNA methyltransferase 11<br>homolog ( <i>S. cerevisiae</i> ) | -<br>2.44 |
| 218894_s_at | FLJ10292 | mago-nashi homolog 2                                          | -<br>1.69 |
| 218916_at   | ZNF768   | zinc finger protein 768                                       | 1.72      |
| 218924_s_at | CTBS     | chitobiase, di-N-acetyl-                                      | -<br>2.44 |
| 218938_at   | FBXL15   | F-box and leucine-rich repeat<br>protein 15                   | -<br>1.36 |
| 218965_s_at | TUT1     | terminal uridylyl transferase 1, U6<br>snRNA-specific         | 1.7       |



|             |         |                                                                   |           |
|-------------|---------|-------------------------------------------------------------------|-----------|
| 218979_at   | RMI1    | RMI1, RecQ mediated genome instability 1, homolog (S. cerevisiae) | -<br>1.41 |
| 218984_at   | PUS7    | pseudouridylate synthase 7 homolog (S. cerevisiae)                | -<br>2.04 |
| 218993_at   | RNMTL1  | RNA methyltransferase like 1                                      | -<br>1.37 |
| 219008_at   | C2orf43 | chromosome 2 open reading frame 43                                | -1.6      |
| 219015_s_at | ALG13   | asparagine-linked glycosylation 13 homolog (S. cerevisiae)        | -<br>2.17 |
| 219030_at   | TPRKB   | TP53RK binding protein                                            | -<br>2.21 |
| 219034_at   | PARP16  | poly (ADP-ribose) polymerase family, member 16                    | -<br>1.43 |
| 219041_s_at | REPIN1  | replication initiator 1                                           | -         |

|             |         |                                       |           |
|-------------|---------|---------------------------------------|-----------|
|             |         |                                       | 1.62      |
| 219050_s_at | ZNHIT2  | zinc finger, HIT type 2               | -<br>1.38 |
| 219055_at   | SRBD1   | S1 RNA binding domain 1               | -<br>1.45 |
| 219061_s_at | LAGE3   | L antigen family, member 3            | -<br>1.61 |
| 219065_s_at | MEMO1   | mediator of cell motility 1           | -<br>1.93 |
| 219074_at   | TMEM34  | transmembrane protein 34              | -<br>1.62 |
| 219078_at   | GPATCH2 | G patch domain containing 2           | -1.3      |
| 219079_at   | CYB5R4  | cytochrome b5 reductase 4             | -<br>1.46 |
| 219082_at   | AMDHD2  | amidohydrolase domain containing<br>2 | 1.62      |
| 219083_at   | SHQ1    | SHQ1 homolog ( <i>S. cerevisiae</i> ) | -<br>1.48 |
| 219088_s_at | ZNF576  | zinc finger protein 576               | -<br>1.43 |

|             |         |                                                |           |
|-------------|---------|------------------------------------------------|-----------|
| 219112_at   | RAPGEF6 | Rap guanine nucleotide exchange factor (GEF) 6 | 1.33      |
| 219117_s_at | FKBP11  | FK506 binding protein 11, 19 kDa               | -<br>2.37 |
| 219118_at   | FKBP11  | FK506 binding protein 11, 19 kDa               | -<br>2.32 |
| 219123_at   | ZNF232  | zinc finger protein 232                        | -<br>1.44 |
| 219124_at   | C8orf41 | chromosome 8 open reading frame 41             | -<br>1.37 |
| 219130_at   | CCDC76  | coiled-coil domain containing 76               | -<br>1.87 |
| 219133_at   | OXSM    | 3-oxoacyl-ACP synthase, mitochondrial          | -<br>1.92 |
| 219149_x_at | DBR1    | debranching enzyme homolog 1 (S. cerevisiae)   | -<br>1.46 |
| 219151_s_at | RABL2B  | RAB, member of RAS oncogene family-like 2B     | -<br>1.35 |

|             |          |                                                                |           |
|-------------|----------|----------------------------------------------------------------|-----------|
| 219164_s_at | ATG2B    | ATG2 autophagy related 2 homolog<br>B ( <i>S. cerevisiae</i> ) | -<br>2.28 |
| 219212_at   | HSPA14   | heat shock 70kDa protein 14                                    | -<br>1.64 |
| 219222_at   | RBKS     | ribokinase                                                     | -<br>1.52 |
| 219234_x_at | SCRN3    | secernin 3                                                     | -<br>1.18 |
| 219240_s_at | C10orf88 | chromosome 10 open reading frame<br>88                         | -<br>1.22 |
| 219242_at   | CEP63    | centrosomal protein 63kDa                                      | -<br>1.53 |
| 219251_s_at | WDR60    | WD repeat domain 60                                            | -<br>1.47 |
| 219289_at   | HEATR3   | HEAT repeat containing 3                                       | -<br>1.83 |
| 219311_at   | CEP76    | centrosomal protein 76kDa                                      | -<br>1.36 |
| 219335_at   | ARMCX5   | armadillo repeat containing, X-<br>linked 5                    | -<br>1.84 |

|             |         |                                                                                                  |           |
|-------------|---------|--------------------------------------------------------------------------------------------------|-----------|
| 219346_at   | LRFN3   | leucine rich repeat and fibronectin<br>type III domain containing 3                              | -<br>1.29 |
| 219350_s_at | DIABLO  | diablo homolog (Drosophila)                                                                      | -<br>1.38 |
| 219355_at   | CXorf57 | chromosome X open reading frame<br>57                                                            | -1.2      |
| 219374_s_at | ALG9    | asparagine-linked glycosylation 9<br>homolog (S. cerevisiae, alpha- 1,2-<br>mannosyltransferase) | -<br>1.47 |
| 219402_s_at | DERL1   | Der1-like domain family, member 1                                                                | -<br>2.05 |
| 219406_at   | C1orf50 | chromosome 1 open reading frame<br>50                                                            | -<br>1.61 |
| 219425_at   | SULT4A1 | sulfotransferase family 4A, member<br>1                                                          | 1.39      |

|             |         |                                                                    |      |
|-------------|---------|--------------------------------------------------------------------|------|
|             |         |                                                                    | -    |
| 219447_s_at | SLC35C2 | solute carrier family 35, member C2                                | 1.32 |
|             |         |                                                                    | -    |
| 219459_at   | POLR3B  | polymerase (RNA) III (DNA directed) polypeptide B                  | 1.73 |
|             |         |                                                                    | -    |
| 219467_at   | GIN1    | gypsy retrotransposon integrase 1                                  | 1.43 |
|             |         |                                                                    | -    |
| 219479_at   | KDELC1  | KDEL (Lys-Asp-Glu-Leu) containing 1                                | 1.89 |
|             |         |                                                                    | -    |
| 219495_s_at | ZNF180  | zinc finger protein 180                                            | 1.26 |
|             |         |                                                                    | -    |
| 219500_at   | CLCF1   | cardiotrophin-like cytokine factor 1                               | 1.39 |
|             |         |                                                                    | -    |
| 219513_s_at | SH2D3A  | SH2 domain containing 3A                                           | 1.25 |
|             |         |                                                                    | -    |
| 219516_at   | TRPV4   | transient receptor potential cation channel, subfamily V, member 4 | 1.65 |
|             |         |                                                                    | -    |
| 219539_at   | GEMIN6  | gem (nuclear organelle) associated protein 6                       | -1.5 |

|             |        |                                                                                                 |           |
|-------------|--------|-------------------------------------------------------------------------------------------------|-----------|
| 219548_at   | ZNF16  | zinc finger protein 16                                                                          | 1.4       |
| 219583_s_at | SPATA7 | spermatogenesis associated 7                                                                    | 1.32      |
| 219644_at   | CCDC41 | coiled-coil domain containing 41                                                                | -<br>1.28 |
| 219649_at   | ALG6   | asparagine-linked glycosylation 6<br>homolog (S. cerevisiae, alpha-1,3-<br>glucosyltransferase) | -<br>1.48 |
| 219664_s_at | DECR2  | 2,4-dienoyl CoA reductase 2,<br>peroxisomal                                                     | -1.8      |
| 219673_at   |        | NA                                                                                              | -<br>1.48 |
| 219689_at   | SEMA3G | sema domain, immunoglobulin<br>domain (Ig), short basic domain,<br>secreted, (semaphorin) 3G    | 1.42      |
| 219707_at   | CPNE7  | copine VII                                                                                      | 1.52      |

|             |          |                                                          |           |
|-------------|----------|----------------------------------------------------------|-----------|
| 219746_at   | DPF3     | D4, zinc and double PHD fingers,<br>family 3             | -1.2      |
| 219766_at   | MGC4093  | hypothetical protein MGC4093                             | 1.76      |
| 219775_s_at | CPLX3    | complexin 3                                              | 1.43      |
| 219785_s_at | FBXO31   | F-box protein 31                                         | -<br>1.49 |
| 219814_at   | MBNL3    | muscleblind-like 3 (Drosophila)                          | -<br>2.21 |
| 219816_s_at | RBM23    | RNA binding motif protein 23                             | -<br>1.38 |
| 219822_at   | MTRF1    | mitochondrial translational release<br>factor 1          | -<br>1.25 |
| 219829_at   | ITGB1BP2 | integrin beta 1 binding protein<br>(melusin) 2           | -<br>1.27 |
| 219864_s_at | RCAN3    | RCAN family member 3                                     | 1.11      |
| 219869_s_at | SLC39A8  | solute carrier family 39 (zinc<br>transporter), member 8 | -<br>1.77 |



|             |          |                                                              |           |
|-------------|----------|--------------------------------------------------------------|-----------|
| 219913_s_at | CRNKL1   | crooked neck pre-mRNA splicing<br>factor-like 1 (Drosophila) | -<br>1.64 |
| 219931_s_at | KLHL12   | kelch-like 12 (Drosophila)                                   | -<br>1.23 |
| 219933_at   | GLRX2    | glutaredoxin 2                                               | -<br>1.61 |
| 219949_at   | LRRC2    | leucine rich repeat containing 2                             | -<br>1.97 |
| 219950_s_at | TIAM2    | T-cell lymphoma invasion and<br>metastasis 2                 | -<br>1.16 |
| 219979_s_at | C11orf73 | chromosome 11 open reading frame<br>73                       | -<br>2.03 |
| 220052_s_at | TINF2    | TERF1 (TRF1)-interacting nuclear<br>factor 2                 | 1.47      |
| 220057_at   | XAGE1D   | X antigen family, member 1D                                  | 1.67      |

|             |          |                                                         |           |
|-------------|----------|---------------------------------------------------------|-----------|
| 220063_at   | GSTCD    | glutathione S-transferase, C-terminal domain containing | -<br>1.12 |
| 220083_x_at | UCHL5    | ubiquitin carboxyl-terminal hydrolase L5                | -<br>1.25 |
| 220117_at   | ZNF659   | zinc finger protein 659                                 | 1.42      |
| 220127_s_at | FBXL12   | F-box and leucine-rich repeat protein 12                | -<br>1.69 |
| 220155_s_at | BRD9     | bromodomain containing 9                                | 1.48      |
| 220172_at   | C2orf37  | chromosome 2 open reading frame 37                      | -<br>1.12 |
| 220192_x_at | SPDEF    | SAM pointed domain containing ets transcription factor  | 1.4       |
| 220219_s_at | LRRC37A3 | leucine rich repeat containing 37, member A3            | 1.38      |
| 220248_x_at | NSFL1C   | NSFL1 (p97) cofactor (p47)                              | -<br>1.67 |

|             |         |                                                      |           |
|-------------|---------|------------------------------------------------------|-----------|
| 220252_x_at | CXorf21 | chromosome X open reading frame<br>21                | 1.73      |
| 220263_at   | SMAD5OS | SMAD family member 5 opposite<br>strand              | -<br>1.28 |
| 220273_at   | IL17B   | interleukin 17B                                      | 1.58      |
| 220337_at   | NGB     | neuroglobin                                          | 1.81      |
| 220342_x_at | EDEM3   | ER degradation enhancer,<br>mannosidase alpha-like 3 | -<br>2.26 |
| 220367_s_at | SAP130  | Sin3A-associated protein, 130kDa                     | -<br>1.46 |
| 220387_s_at | HHLA3   | HERV-H LTR-associating 3                             | -<br>1.58 |
| 220410_s_at | FBXL11  | F-box and leucine-rich repeat<br>protein 11          | 1.15      |
| 220451_s_at | BIRC7   | baculoviral IAP repeat-containing 7<br>(livin)       | 1.53      |

|             |           |                                                                           |           |
|-------------|-----------|---------------------------------------------------------------------------|-----------|
| 220455_at   | SLC16A8   | solute carrier family 16, member 8<br>(monocarboxylic acid transporter 3) | 1.44      |
| 220469_at   | COPE      | coatamer protein complex, subunit<br>epsilon                              | 1.46      |
| 220480_at   | HAND2     | heart and neural crest derivatives<br>expressed 2                         | 1.69      |
| 220488_s_at | BCAS3     | breast carcinoma amplified<br>sequence 3                                  | 1.43      |
| 220506_at   | GUCY1B2   | guanylate cyclase 1, soluble, beta 2                                      | 1.25      |
| 220525_s_at | AUP1      | ancient ubiquitous protein 1                                              | -<br>1.72 |
| 220536_at   | C14orf115 | chromosome 14 open reading frame<br>115                                   | 1.58      |
| 220557_s_at | PACS1     | phosphofurin acidic cluster sorting<br>protein 1                          | 1.53      |

|             |         |                                                                                                |           |
|-------------|---------|------------------------------------------------------------------------------------------------|-----------|
| 220561_at   | IGF2AS  | insulin-like growth factor 2<br>antisense                                                      | 1.74      |
| 220562_at   | CYP2W1  | cytochrome P450, family 2,<br>subfamily W, polypeptide 1                                       | 2.06      |
| 220581_at   | C6orf97 | chromosome 6 open reading frame<br>97                                                          | 1.13      |
| 220598_at   | CARD14  | caspase recruitment domain family,<br>member 14                                                | 1.25      |
| 220605_s_at | SIRT2   | sirtuin (silent mating type<br>information regulation 2 homolog)<br>2 ( <i>S. cerevisiae</i> ) | -<br>1.51 |
| 220607_x_at | TH1L    | TH1-like ( <i>Drosophila</i> )                                                                 | -<br>1.56 |
| 220640_at   | CSNK1G1 | casein kinase 1, gamma 1                                                                       | 1.34      |

|             |         |                                                              |           |
|-------------|---------|--------------------------------------------------------------|-----------|
|             |         |                                                              | -         |
| 220682_s_at | KLHL5   | kelch-like 5 (Drosophila)                                    | 1.15      |
| 220705_s_at | ADAMTS7 | ADAM metallopeptidase with<br>thrombospondin type 1 motif, 7 | 1.49      |
| 220706_at   | ADAMTS7 | ADAM metallopeptidase with<br>thrombospondin type 1 motif, 7 | 1.3       |
| 220726_at   |         | NA                                                           | 1.16      |
| 220742_s_at | NGLY1   | N-glycanase 1                                                | -<br>1.51 |
| 220756_s_at | GPR172B | G protein-coupled receptor 172B                              | 1.4       |
| 220775_s_at | UEVLD   | UEV and lactate/malate<br>dehydrogenase domains              | -1.7      |
| 220789_s_at | TBRG4   | transforming growth factor beta<br>regulator 4               | -<br>1.35 |
| 220798_x_at | PRG2    | plasticity-related gene 2                                    | 2.57      |
| 220837_at   |         | NA                                                           | 1.09      |

|             |            |                                                                                                                           |           |
|-------------|------------|---------------------------------------------------------------------------------------------------------------------------|-----------|
| 220865_s_at | PDSS1      | prenyl (decaprenyl) diphosphate<br>synthase, subunit 1                                                                    | -<br>1.67 |
| 220917_s_at | WDR19      | WD repeat domain 19                                                                                                       | -<br>1.86 |
| 220926_s_at | EDEM3      | ER degradation enhancer,<br>mannosidase alpha-like 3                                                                      | -<br>2.87 |
| 220937_s_at | ST6GALNAC4 | ST6 (alpha-N-acetyl-neuraminyl-<br>2,3-beta-galactosyl-1,3)-N-<br>acetylgalactosaminide alpha-2,6-<br>sialyltransferase 4 | 1.49      |
| 220946_s_at | SETD2      | SET domain containing 2                                                                                                   | 1.42      |
| 220997_s_at | DIAPH3     | diaphanous homolog 3 (Drosophila)                                                                                         | -<br>1.12 |

|             |          |                                                                            |           |
|-------------|----------|----------------------------------------------------------------------------|-----------|
| 221023_s_at | KCNH6    | potassium voltage-gated channel,<br>subfamily H (eag-related), member<br>6 | 1.56      |
| 221053_s_at | TDRKH    | tudor and KH domain containing                                             | -<br>1.15 |
| 221090_s_at | OGFOD1   | 2-oxoglutarate and iron-dependent<br>oxygenase domain containing 1         | -<br>1.67 |
| 221094_s_at | ELP3     | elongation protein 3 homolog (S.<br>cerevisiae)                            | -<br>1.31 |
| 221122_at   | HRASLS2  | HRAS-like suppressor 2                                                     | 1.29      |
| 221190_s_at | C18orf8  | chromosome 18 open reading frame<br>8                                      | -<br>1.92 |
| 221194_s_at | LOC51136 | PTD016 protein                                                             | -<br>1.59 |
| 221196_x_at | BRCC3    | BRCA1/BRCA2-containing<br>complex, subunit 3                               | -<br>1.45 |



|             |          |                                                                    |           |
|-------------|----------|--------------------------------------------------------------------|-----------|
| 221198_at   | SCT      | secretin                                                           | 1.66      |
| 221204_s_at | CRTAC1   | cartilage acidic protein 1                                         | 1.29      |
| 221222_s_at | C1orf56  | chromosome 1 open reading frame<br>56                              | -<br>1.31 |
| 221223_x_at | CISH     | cytokine inducible SH2-containing<br>protein                       | -2.1      |
| 221224_s_at | DCAKD    | dephospho-CoA kinase domain<br>containing                          | 1.21      |
| 221227_x_at | COQ3     | coenzyme Q3 homolog,<br>methyltransferase ( <i>S. cerevisiae</i> ) | -<br>1.59 |
| 221229_s_at | FLJ20628 | hypothetical protein FLJ20628                                      | -<br>1.66 |
| 221253_s_at | TXNDC5   | thioredoxin domain containing 5                                    | -<br>1.91 |
| 221255_s_at | TMEM93   | transmembrane protein 93                                           | -<br>1.89 |
| 221267_s_at | FAM108A1 | family with sequence similarity<br>108, member A1                  | -<br>1.53 |

|             |         |                                                                   |           |
|-------------|---------|-------------------------------------------------------------------|-----------|
|             |         |                                                                   |           |
| 221284_s_at | SRC     | v-src sarcoma (Schmidt-Ruppin A-2) viral oncogene homolog (avian) | 1.25      |
| 221291_at   | ULBP2   | UL16 binding protein 2                                            | 1.25      |
| 221333_at   | FOXP3   | forkhead box P3                                                   | 1.51      |
| 221363_x_at | GPR25   | G protein-coupled receptor 25                                     | 1.25      |
| 221383_at   | NMUR1   | neuromedin U receptor 1                                           | 1.67      |
| 221387_at   | NPFRR1  | neuropeptide FF receptor 1                                        | 1.5       |
| 221404_at   | IL1F6   | interleukin 1 family, member 6 (epsilon)                          | 1.26      |
| 221408_x_at | PCDHB12 | protocadherin beta 12                                             | 1.42      |
| 221410_x_at | PCDHB3  | protocadherin beta 3                                              | 1.39      |
| 221450_x_at | PCDHB13 | protocadherin beta 13                                             | 1.51      |
| 221490_at   | UBAP1   | ubiquitin associated protein 1                                    | -<br>1.42 |

|             |         |                                                                                 |           |
|-------------|---------|---------------------------------------------------------------------------------|-----------|
| 221516_s_at | SMCR7L  | Smith-Magenis syndrome<br>chromosome region, candidate 7-<br>like               | -<br>1.84 |
| 221547_at   | PRPF18  | PRP18 pre-mRNA processing<br>factor 18 homolog ( <i>S. cerevisiae</i> )         | -<br>1.69 |
| 221550_at   | COX15   | COX15 homolog, cytochrome c<br>oxidase assembly protein (yeast)                 | -<br>1.34 |
| 221556_at   | CDC14B  | CDC14 cell division cycle 14<br>homolog B ( <i>S. cerevisiae</i> )              | -<br>2.64 |
| 221597_s_at | HSPC171 | HSPC171 protein                                                                 | -1.5      |
| 221647_s_at | RIC8A   | resistance to inhibitors of<br>cholinesterase 8 homolog A ( <i>C. elegans</i> ) | -<br>1.31 |
| 221650_s_at | MED18   | mediator complex subunit 18                                                     | -<br>1.39 |

|             |          |                                                   |           |
|-------------|----------|---------------------------------------------------|-----------|
| 221652_s_at | C12orf11 | chromosome 12 open reading frame<br>11            | -<br>1.55 |
| 221669_s_at | ACAD8    | acyl-Coenzyme A dehydrogenase<br>family, member 8 | -<br>1.79 |
| 221677_s_at | DONSON   | downstream neighbor of SON                        | -<br>1.83 |
| 221679_s_at | ABHD6    | abhydrolase domain containing 6                   | -<br>2.54 |
| 221730_at   | COL5A2   | collagen, type V, alpha 2                         | 1.69      |
| 221739_at   | C19orf10 | chromosome 19 open reading frame<br>10            | -<br>2.51 |
| 221741_s_at | YTHDF1   | YTH domain family, member 1                       | -<br>1.55 |
| 221758_at   | ARMC6    | armadillo repeat containing 6                     | -<br>1.49 |
| 221782_at   | DNAJC10  | DnaJ (Hsp40) homolog, subfamily<br>C, member 10   | -<br>2.47 |

|             |           |                                                       |           |
|-------------|-----------|-------------------------------------------------------|-----------|
| 221786_at   | C6orf120  | chromosome 6 open reading frame<br>120                | -<br>2.74 |
| 221788_at   | PGM3      | phosphoglucomutase 3                                  | -<br>2.39 |
| 221819_at   | RAB35     | RAB35, member RAS oncogene<br>family                  | -<br>1.45 |
| 221827_at   | RBCK1     | RanBP-type and C3HC4-type zinc<br>finger containing 1 | -<br>2.06 |
| 221844_x_at |           | NA                                                    | -<br>1.78 |
| 221858_at   | TBC1D12   | TBC1 domain family, member 12                         | -<br>1.36 |
| 221885_at   | DENND2A   | DENN/MADD domain containing<br>2A                     | 1.41      |
| 221921_s_at | CADM3     | cell adhesion molecule 3                              | 1.47      |
| 221954_at   | C20orf111 | chromosome 20 open reading frame<br>111               | -<br>1.46 |
| 222060_at   | KRT8P12   | keratin 8 pseudogene 12                               | 1.71      |

|             |           |                                                             |           |
|-------------|-----------|-------------------------------------------------------------|-----------|
| 222064_s_at | AARSD1    | alanyl-tRNA synthetase domain<br>containing 1               | -1.3      |
| 222080_s_at |           | NA                                                          | 1.57      |
| 222143_s_at | MTMR14    | myotubularin related protein 14                             | -<br>1.35 |
| 222148_s_at | RHOT1     | ras homolog gene family, member<br>T1                       | -<br>1.47 |
| 222163_s_at | SPATA5L1  | spermatogenesis associated 5-like 1                         | -<br>1.76 |
| 222182_s_at | CNOT2     | CCR4-NOT transcription complex,<br>subunit 2                | 1.84      |
| 222207_x_at | LOC389517 | Williams Beuren syndrome<br>chromosome region 19 pseudogene | 1.8       |
| 222216_s_at | MRPL17    | mitochondrial ribosomal protein<br>L17                      | -<br>1.56 |
| 222262_s_at | ETNK1     | ethanolamine kinase 1                                       | -         |

|             |           |                                                                                              |           |
|-------------|-----------|----------------------------------------------------------------------------------------------|-----------|
|             |           |                                                                                              | 2.38      |
| 222297_x_at | RPL18     | ribosomal protein L18                                                                        | 1.62      |
| 222323_at   |           | NA                                                                                           | 1.43      |
| 222361_at   | LOC643224 | similar to tubulin, beta 8                                                                   | 1.14      |
| 222377_at   | TBX10     | T-box 10                                                                                     | 1.46      |
| 32062_at    | LRRC14    | leucine rich repeat containing 14                                                            | 1.26      |
| 32837_at    | AGPAT2    | 1-acylglycerol-3-phosphate O-acyltransferase 2 (lysophosphatidic acid acyltransferase, beta) | -<br>1.97 |
| 34187_at    | RBMS2     | RNA binding motif, single stranded interacting protein 2                                     | 1.22      |
| 34764_at    | LARS2     | leucyl-tRNA synthetase 2, mitochondrial                                                      | -<br>1.62 |

|          |         |                                                                                                          |           |
|----------|---------|----------------------------------------------------------------------------------------------------------|-----------|
| 35156_at | R3HCC1  | R3H domain and coiled-coil<br>containing 1                                                               | -<br>1.43 |
| 35179_at | B3GAT3  | beta-1,3-glucuronyltransferase 3<br>(glucuronosyltransferase I)                                          | 1.51      |
| 35846_at | THRA    | thyroid hormone receptor, alpha<br>(erythroblastic leukemia viral (v-<br>erb-a) oncogene homolog, avian) | 1.29      |
| 36566_at | CTNS    | cystinosis, nephropathic                                                                                 | -<br>1.59 |
| 36830_at | MIPEP   | mitochondrial intermediate<br>peptidase                                                                  | -<br>1.47 |
| 36936_at | TSTA3   | tissue specific transplantation<br>antigen P35B                                                          | -<br>2.03 |
| 36994_at | ATP6V0C | ATPase, H <sup>+</sup> transporting, lysosomal<br>16kDa, V0 subunit c                                    | -<br>1.64 |



|            |          |                                                                                                    |           |
|------------|----------|----------------------------------------------------------------------------------------------------|-----------|
| 37566_at   | KIAA1045 | KIAA1045                                                                                           | 1.17      |
| 37872_at   | JRK      | jerky homolog (mouse)                                                                              | 1.4       |
| 39248_at   | AQP3     | aquaporin 3 (Gill blood group)                                                                     | -<br>2.39 |
| 39650_s_at | PCNXL2   | pecanex-like 2 (Drosophila)                                                                        | 1.56      |
| 40465_at   | DDX23    | DEAD (Asp-Glu-Ala-Asp) box<br>polypeptide 23                                                       | -<br>1.63 |
| 40472_at   | AGPAT7   | 1-acylglycerol-3-phosphate O-<br>acyltransferase 7 (lysophosphatidic<br>acid acyltransferase, eta) | 1.6       |
| 45828_at   | FLJ10241 | hypothetical protein FLJ10241                                                                      | -<br>1.46 |
| 49485_at   | PRDM4    | PR domain containing 4                                                                             | 1.28      |
| 50314_i_at | C20orf27 | chromosome 20 open reading frame<br>27                                                             | 1.26      |

|            |          |                                                                     |      |
|------------|----------|---------------------------------------------------------------------|------|
|            |          |                                                                     | -    |
| 52285_f_at | CEP76    | centrosomal protein 76kDa                                           | 1.62 |
|            |          |                                                                     | -    |
| 53720_at   | FLJ11286 | hypothetical protein FLJ11286                                       | 1.95 |
|            |          |                                                                     | -    |
| 55065_at   | MARK4    | MAP/microtubule affinity-regulating kinase 4                        | 2.26 |
| 55081_at   | MICALL1  | MICAL-like 1                                                        | -1.5 |
|            |          |                                                                     | -    |
| 55692_at   | ELMO2    | engulfment and cell motility 2                                      | 1.45 |
|            |          |                                                                     | -    |
| 564_at     | GNA11    | guanine nucleotide binding protein (G protein), alpha 11 (Gq class) | 1.54 |
| 65493_at   | HEATR6   | HEAT repeat containing 6                                            | 1.17 |
|            |          |                                                                     | -    |
| 89948_at   | C20orf67 | chromosome 20 open reading frame 67                                 | 1.23 |



**Supplemental Table 2-** Differentially expressed genes between HCV cirrhotic tissues and normal livers

| <b>Affy ID</b> | <b>Symbol</b> | <b>Gene Name</b>                                                                                           | <b>Fold</b> |
|----------------|---------------|------------------------------------------------------------------------------------------------------------|-------------|
| 1294_at        | UBE1L         | ubiquitin-activating enzyme<br>E1-like                                                                     | 1.36        |
| 1316_at        | THRA          | thyroid hormone receptor,<br>alpha (erythroblastic leukemia<br>viral (v-erb-a) oncogene<br>homolog, avian) | -<br>1.31   |
| 1405_i_at      | CCL5          | chemokine (C-C motif) ligand<br>5                                                                          | 4.71        |
| 160020_at      | MMP14         | matrix metalloproteinase 14<br>(membrane-inserted)                                                         | -<br>1.37   |
| 200005_at      | EIF3D         | eukaryotic translation initiation<br>factor 3, subunit D                                                   | 1.93        |
| 200011_s_at    | ARF3          | ADP-ribosylation factor 3                                                                                  | 1.48        |
| 200016_x_at    | HNRNPA1       | heterogeneous nuclear<br>ribonucleoprotein A1                                                              | 1.53        |

|             |        |                                                                                          |           |
|-------------|--------|------------------------------------------------------------------------------------------|-----------|
|             |        |                                                                                          |           |
| 200022_at   | RPL18  | ribosomal protein L18                                                                    | 1.38      |
| 200033_at   | DDX5   | DEAD (Asp-Glu-Ala-Asp) box polypeptide 5                                                 | 1.42      |
| 200086_s_at | COX4I1 | cytochrome c oxidase subunit IV isoform 1                                                | 1.26      |
| 200609_s_at | WDR1   | WD repeat domain 1                                                                       | 1.45      |
| 200624_s_at | MATR3  | matrin 3                                                                                 | 1.46      |
| 200635_s_at | PTPRF  | protein tyrosine phosphatase, receptor type, F                                           | -<br>1.69 |
| 200640_at   | YWHAZ  | tyrosine 3-monooxygenase/tryptophan 5-monooxygenase activation protein, zeta polypeptide | 1.93      |
| 200643_at   | HDLBP  | high density lipoprotein binding protein (vigilin)                                       | -<br>1.56 |

|             |         |                                                                                 |      |
|-------------|---------|---------------------------------------------------------------------------------|------|
| 200661_at   | CTSA    | cathepsin A                                                                     | 1.49 |
| 200662_s_at | TOMM20  | translocase of outer<br>mitochondrial membrane 20<br>homolog (yeast)            | 1.43 |
| 200670_at   | XBP1    | X-box binding protein 1                                                         | 1.54 |
| 200678_x_at | GRN     | granulin                                                                        | 1.58 |
| 200695_at   | PPP2R1A | protein phosphatase 2 (formerly<br>2A), regulatory subunit A ,<br>alpha isoform | 1.42 |
| 200697_at   | HK1     | hexokinase 1                                                                    | 1.89 |
| 200701_at   | NPC2    | Niemann-Pick disease, type C2                                                   | 1.83 |
| 200711_s_at | SKP1A   | S-phase kinase-associated<br>protein 1A (p19A)                                  | 1.47 |
| 200712_s_at | MAPRE1  | microtubule-associated protein,<br>RP/EB family, member 1                       | 2.06 |

|             |        |                                                                        |           |
|-------------|--------|------------------------------------------------------------------------|-----------|
| 200713_s_at | MAPRE1 | microtubule-associated protein,<br>RP/EB family, member 1              | 1.57      |
| 200721_s_at | ACTR1A | ARP1 actin-related protein 1<br>homolog A, centractin alpha<br>(yeast) | -<br>1.35 |
| 200724_at   | RPL10  | ribosomal protein L10                                                  | -<br>1.25 |
| 200725_x_at | RPL10  | ribosomal protein L10                                                  | 1.31      |
| 200726_at   | PPP1CC | protein phosphatase 1, catalytic<br>subunit, gamma isoform             | 1.87      |
| 200741_s_at | RPS27  | ribosomal protein S27<br>(metalloprotein 1)                            | 1.29      |
| 200743_s_at | TPP1   | tripeptidyl peptidase I                                                | 1.44      |

|             |         |                                                                    |           |
|-------------|---------|--------------------------------------------------------------------|-----------|
| 200746_s_at | GNB1    | guanine nucleotide binding protein (G protein), beta polypeptide 1 | 1.54      |
| 200754_x_at | SFRS2   | splicing factor, arginine/serine-rich 2                            | 1.67      |
| 200757_s_at | CALU    | calumenin                                                          | -<br>1.54 |
| 200760_s_at | ARL6IP5 | ADP-ribosylation-like factor 6 interacting protein 5               | 2.26      |
| 200761_s_at | ARL6IP5 | ADP-ribosylation-like factor 6                                     | 2.12      |



|             |       |                                                                            |           |
|-------------|-------|----------------------------------------------------------------------------|-----------|
|             |       | interacting protein 5                                                      |           |
| 200778_s_at | 2-Sep | septin 2                                                                   | 1.82      |
| 200780_x_at | GNAS  | GNAS complex locus                                                         | 1.46      |
| 200785_s_at | LRP1  | low density lipoprotein-related protein 1 (alpha-2-macroglobulin receptor) | -<br>1.42 |
| 200787_s_at | PEA15 | phosphoprotein enriched in astrocytes 15                                   | 2.38      |
| 200809_x_at | RPL12 | ribosomal protein L12                                                      | 1.56      |
| 200811_at   | CIRBP | cold inducible RNA binding protein                                         | 2.01      |
| 200819_s_at | RPS15 | ribosomal protein S15                                                      | 1.48      |
| 200823_x_at | RPL29 | ribosomal protein L29                                                      | 1.43      |

|             |          |                                                              |           |
|-------------|----------|--------------------------------------------------------------|-----------|
| 200826_at   | SNRPD2   | small nuclear ribonucleoprotein<br>D2 polypeptide 16.5kDa    | 1.7       |
| 200851_s_at | KIAA0174 | KIAA0174                                                     | 1.68      |
| 200854_at   | NCOR1    | nuclear receptor co-repressor 1                              | -<br>1.71 |
| 200862_at   | DHCR24   | 24-dehydrocholesterol<br>reductase                           | -<br>2.18 |
| 200863_s_at | RAB11A   | RAB11A, member RAS<br>oncogene family                        | 1.51      |
| 200872_at   | S100A10  | S100 calcium binding protein<br>A10                          | 2.5       |
| 200883_at   | UQCRC2   | ubiquinol-cytochrome c<br>reductase core protein II          | 1.53      |
| 200887_s_at | STAT1    | signal transducer and activator<br>of transcription 1, 91kDa | 2.6       |
| 200898_s_at | MGEA5    | meningioma expressed antigen<br>5 (hyaluronidase)            | 1.6       |

|             |          |                                                            |           |
|-------------|----------|------------------------------------------------------------|-----------|
| 200899_s_at | MGEA5    | meningioma expressed antigen<br>5 (hyaluronidase)          | 1.79      |
| 200903_s_at | AHCY     | S-adenosylhomocysteine<br>hydrolase                        | -<br>1.57 |
| 200904_at   | HLA-E    | major histocompatibility<br>complex, class I, E            | 2.12      |
| 200912_s_at | EIF4A2   | eukaryotic translation initiation<br>factor 4A, isoform 2  | 1.65      |
| 200923_at   | LGALS3BP | lectin, galactoside-binding,<br>soluble, 3 binding protein | 5.9       |
| 200932_s_at | DCTN2    | dynactin 2 (p50)                                           | 1.3       |
| 200933_x_at | RPS4X    | ribosomal protein S4, X-linked                             | 1.28      |
| 200940_s_at | RERE     | arginine-glutamic acid<br>dipeptide (RE) repeats           | 1.72      |
| 200947_s_at | GLUD1    | glutamate dehydrogenase 1                                  | -2.2      |
| 200949_x_at | RPS20    | ribosomal protein S20                                      | 1.45      |

|             |         |                                                                                       |           |
|-------------|---------|---------------------------------------------------------------------------------------|-----------|
| 200953_s_at | CCND2   | cyclin D2                                                                             | 2.09      |
| 200958_s_at | SDCBP   | syndecan binding protein<br>(syntenin)                                                | 1.63      |
| 200961_at   | SEPHS2  | selenophosphate synthetase 2                                                          | -<br>1.65 |
| 200962_at   | RPL31   | ribosomal protein L31                                                                 | 2.38      |
| 200963_x_at | RPL31   | ribosomal protein L31                                                                 | 1.43      |
| 200975_at   | PPT1    | palmitoyl-protein thioesterase 1<br>(ceroid-lipofuscinosis, neuronal<br>1, infantile) | 2.8       |
| 200977_s_at | TAX1BP1 | Tax1 (human T-cell leukemia<br>virus type I) binding protein 1                        | 1.46      |
| 200978_at   | MDH1    | malate dehydrogenase 1, NAD<br>(soluble)                                              | 1.49      |
| 200981_x_at | GNAS    | GNAS complex locus                                                                    | 1.51      |
| 200983_x_at | CD59    | CD59 molecule, complement<br>regulatory protein                                       | 2.28      |

|             |       |                                                                                                                                                       |      |
|-------------|-------|-------------------------------------------------------------------------------------------------------------------------------------------------------|------|
|             |       |                                                                                                                                                       |      |
| 200984_s_at | CD59  | CD59 molecule, complement<br>regulatory protein                                                                                                       | 2.2  |
| 200985_s_at | CD59  | CD59 molecule, complement<br>regulatory protein                                                                                                       | 1.95 |
| 201007_at   | HADHB | hydroxyacyl-Coenzyme A<br>dehydrogenase/3-ketoacyl-<br>Coenzyme A thiolase/enoyl-<br>Coenzyme A hydratase<br>(trifunctional protein), beta<br>subunit | 1.63 |
| 201011_at   | RPN1  | ribophorin I                                                                                                                                          | -    |

|             |         |                                                   |      |
|-------------|---------|---------------------------------------------------|------|
|             |         |                                                   | 2.12 |
| 201031_s_at | HNRPH1  | heterogeneous nuclear<br>ribonucleoprotein H1 (H) | 1.46 |
| 201044_x_at | DUSP1   | dual specificity phosphatase 1                    | 3.11 |
| 201054_at   | HNRNPA0 | heterogeneous nuclear<br>ribonucleoprotein A0     | 1.65 |
| 201057_s_at | GOLGB1  | golgin B1, golgi integral<br>membrane protein     | 1.42 |
| 201058_s_at | MYL9    | myosin, light chain 9,<br>regulatory              | 3.9  |
| 201070_x_at | SF3B1   | splicing factor 3b, subunit 1,<br>155kDa          | 1.8  |
| 201071_x_at | SF3B1   | splicing factor 3b, subunit 1,<br>155kDa          | 1.72 |
| 201092_at   | RBBP7   | retinoblastoma binding protein<br>7               | 1.39 |
| 201108_s_at | THBS1   | thrombospondin 1                                  | 2.52 |
| 201109_s_at | THBS1   | thrombospondin 1                                  | 4    |

|             |       |                                                                                 |           |
|-------------|-------|---------------------------------------------------------------------------------|-----------|
| 201116_s_at | CPE   | carboxypeptidase E                                                              | 2.26      |
| 201125_s_at | ITGB5 | integrin, beta 5                                                                | 1.65      |
| 201147_s_at | TIMP3 | TIMP metallopeptidase inhibitor 3 (Sorsby fundus dystrophy, pseudoinflammatory) | 2.57      |
| 201152_s_at | MBNL1 | muscleblind-like (Drosophila)                                                   | 1.64      |
| 201159_s_at | NMT1  | N-myristoyltransferase 1                                                        | -<br>1.33 |
| 201164_s_at | PUM1  | pumilio homolog 1 (Drosophila)                                                  | 1.41      |
| 201178_at   | FBXO7 | F-box protein 7                                                                 | 1.6       |
| 201182_s_at | CHD4  | chromodomain helicase DNA binding protein 4                                     | -<br>1.34 |

|             |        |                                                                             |           |
|-------------|--------|-----------------------------------------------------------------------------|-----------|
| 201186_at   | LRPAP1 | low density lipoprotein<br>receptor-related protein<br>associated protein 1 | 1.4       |
| 201217_x_at | RPL3   | ribosomal protein L3                                                        | 1.37      |
| 201218_at   | CTBP2  | C-terminal binding protein 2                                                | 3.1       |
| 201235_s_at | BTG2   | BTG family, member 2                                                        | 1.74      |
| 201236_s_at | BTG2   | BTG family, member 2                                                        | 2.37      |
| 201249_at   | SLC2A1 | solute carrier family 2<br>(facilitated glucose transporter),<br>member 1   | -<br>1.23 |
| 201262_s_at | BGN    | biglycan                                                                    | 2.23      |
| 201265_at   |        | NA                                                                          | -<br>1.25 |
| 201272_at   | AKR1B1 | aldo-keto reductase family 1,<br>member B1 (aldose reductase)               | 2.37      |



|             |         |                                                                        |      |
|-------------|---------|------------------------------------------------------------------------|------|
| 201279_s_at | DAB2    | disabled homolog 2, mitogen-responsive phosphoprotein<br>(Drosophila)  | 2.2  |
| 201288_at   | ARHGDIB | Rho GDP dissociation inhibitor<br>(GDI) beta                           | 3.1  |
| 201295_s_at | WSB1    | WD repeat and SOCS box-containing 1                                    | 2.07 |
| 201303_at   | EIF4A3  | eukaryotic translation initiation<br>factor 4A, isoform 3              | 1.32 |
| 201306_s_at | ANP32B  | acidic (leucine-rich) nuclear<br>phosphoprotein 32 family,<br>member B | 1.41 |
| 201311_s_at | SH3BGRL | SH3 domain binding glutamic<br>acid-rich protein like                  | 3.69 |

|             |          |                                                                                                            |           |
|-------------|----------|------------------------------------------------------------------------------------------------------------|-----------|
| 201314_at   | STK25    | serine/threonine kinase 25<br>(STE20 homolog, yeast)                                                       | -<br>1.33 |
| 201321_s_at | SMARCC2  | SWI/SNF related, matrix<br>associated, actin dependent<br>regulator of chromatin,<br>subfamily c, member 2 | 1.93      |
| 201325_s_at | EMP1     | epithelial membrane protein 1                                                                              | 5.16      |
| 201334_s_at | ARHGEF12 | Rho guanine nucleotide<br>exchange factor (GEF) 12                                                         | -<br>1.55 |
| 201337_s_at | VAMP3    | vesicle-associated membrane<br>protein 3 (cellubrevin)                                                     | 2.35      |
| 201345_s_at | UBE2D2   | ubiquitin-conjugating enzyme<br>E2D 2 (UBC4/5 homolog,<br>yeast)                                           | 1.73      |

|             |          |                                                                                 |           |
|-------------|----------|---------------------------------------------------------------------------------|-----------|
| 201349_at   | SLC9A3R1 | solute carrier family 9<br>(sodium/hydrogen exchanger),<br>member 3 regulator 1 | -<br>1.39 |
| 201368_at   | ZFP36L2  | zinc finger protein 36, C3H<br>type-like 2                                      | 2.01      |
| 201386_s_at | DHX15    | DEAH (Asp-Glu-Ala-His) box<br>polypeptide 15                                    | 1.72      |
| 201394_s_at | RBM5     | RNA binding motif protein 5                                                     | 1.6       |
| 201395_at   | RBM5     | RNA binding motif protein 5                                                     | 1.41      |
| 201403_s_at | MGST3    | microsomal glutathione S-<br>transferase 3                                      | 1.44      |
| 201406_at   | RPL36A   | ribosomal protein L36a                                                          | 1.57      |
| 201414_s_at | NAP1L4   | nucleosome assembly protein<br>1-like 4                                         | 1.5       |
| 201416_at   | SOX4     | SRY (sex determining region<br>Y)-box 4                                         | 1.86      |

|             |        |                                                              |      |
|-------------|--------|--------------------------------------------------------------|------|
| 201417_at   | SOX4   | SRY (sex determining region Y)-box 4                         | 7.29 |
| 201431_s_at | DPYSL3 | dihydropyrimidinase-like 3                                   | 2.09 |
| 201439_at   | GBF1   | golgi-specific brefeldin A resistance factor 1               | 1.41 |
| 201457_x_at | BUB3   | BUB3 budding uninhibited by benzimidazoles 3 homolog (yeast) | 1.54 |
| 201466_s_at | JUN    | jun oncogene                                                 | 3.77 |
| 201480_s_at | SUPT5H | suppressor of Ty 5 homolog (S. cerevisiae)                   | 1.41 |
| 201487_at   | CTSC   | cathepsin C                                                  | 2.08 |
| 201497_x_at | MYH11  | myosin, heavy chain 11, smooth muscle                        | 1.9  |
| 201507_at   | PFDN1  | prefoldin subunit 1                                          | 1.6  |

|             |         |                                                                    |           |
|-------------|---------|--------------------------------------------------------------------|-----------|
| 201514_s_at | G3BP1   | GTPase activating protein (SH3 domain) binding protein 1           | -<br>1.39 |
| 201518_at   | CBX1    | chromobox homolog 1 (HP1 beta homolog Drosophila )                 | 1.98      |
| 201522_x_at | SNRPN   | small nuclear ribonucleoprotein polypeptide N                      | 2         |
| 201524_x_at | UBE2N   | ubiquitin-conjugating enzyme E2N (UBC13 homolog, yeast)            | 1.43      |
| 201527_at   | ATP6V1F | ATPase, H <sup>+</sup> transporting, lysosomal 14kDa, V1 subunit F | 1.43      |
| 201531_at   | ZFP36   | zinc finger protein 36, C3H type, homolog (mouse)                  | 2.42      |
| 201539_s_at | FHL1    | four and a half LIM domains 1                                      | 1.87      |

|             |          |                                                                 |      |
|-------------|----------|-----------------------------------------------------------------|------|
| 201540_at   | FHL1     | four and a half LIM domains 1                                   | 2.08 |
| 201553_s_at | LAMP1    | lysosomal-associated<br>membrane protein 1                      | 1.34 |
| 201578_at   | PODXL    | podocalyxin-like                                                | 2.13 |
| 201579_at   | FAT      | FAT tumor suppressor homolog<br>1 (Drosophila)                  | 2.17 |
| 201592_at   | EIF3H    | eukaryotic translation initiation<br>factor 3, subunit H        | 1.75 |
| 201601_x_at | IFITM1   | interferon induced<br>transmembrane protein 1 (9-27)            | 2.67 |
| 201602_s_at | PPP1R12A | protein phosphatase 1,<br>regulatory (inhibitor) subunit<br>12A | 1.82 |
| 201603_at   | PPP1R12A | protein phosphatase 1,<br>regulatory (inhibitor) subunit<br>12A | 1.84 |

|             |          |                                                                 |           |
|-------------|----------|-----------------------------------------------------------------|-----------|
| 201604_s_at | PPP1R12A | protein phosphatase 1,<br>regulatory (inhibitor) subunit<br>12A | 2.01      |
| 201613_s_at | APIG2    | adaptor-related protein complex<br>1, gamma 2 subunit           | 1.42      |
| 201616_s_at | CALD1    | caldesmon 1                                                     | 2.12      |
| 201640_x_at | CLPTM1   | cleft lip and palate associated<br>transmembrane protein 1      | -<br>1.41 |
| 201641_at   | BST2     | bone marrow stromal cell<br>antigen 2                           | 2.55      |
| 201650_at   | KRT19    | keratin 19                                                      | 3.23      |
| 201669_s_at | MARCKS   | myristoylated alanine-rich<br>protein kinase C substrate        | 3.99      |
| 201670_s_at | MARCKS   | myristoylated alanine-rich<br>protein kinase C substrate        | 2.37      |

|             |         |                                                             |           |
|-------------|---------|-------------------------------------------------------------|-----------|
|             |         |                                                             |           |
| 201684_s_at | TOX4    | TOX high mobility group box<br>family member 4              | -<br>1.28 |
| 201700_at   | CCND3   | cyclin D3                                                   | 1.93      |
| 201701_s_at | PGRMC2  | progesterone receptor<br>membrane component 2               | -<br>1.67 |
| 201718_s_at | EPB41L2 | erythrocyte membrane protein<br>band 4.1-like 2             | 2.14      |
| 201720_s_at | LAPTM5  | lysosomal associated<br>multispanning membrane<br>protein 5 | 2.42      |
| 201721_s_at | LAPTM5  | lysosomal associated<br>multispanning membrane<br>protein 5 | 3.16      |
| 201738_at   | EIF1B   | eukaryotic translation initiation<br>factor 1B              | 1.43      |



|             |        |                                               |           |
|-------------|--------|-----------------------------------------------|-----------|
| 201749_at   | ECE1   | endothelin converting enzyme 1                | -<br>1.58 |
| 201765_s_at | HEXA   | hexosaminidase A (alpha polypeptide)          | 1.45      |
| 201773_at   | ADNP   | activity-dependent neuroprotector homeobox    | 1.6       |
| 201781_s_at | AIP    | aryl hydrocarbon receptor interacting protein | 1.52      |
| 201785_at   | RNASE1 | ribonuclease, RNase A family, 1 (pancreatic)  | 3.12      |
| 201796_s_at | VARS   | valyl-tRNA synthetase                         | -<br>1.37 |
| 201797_s_at | VARS   | valyl-tRNA synthetase                         | -<br>1.86 |
| 201798_s_at | FER1L3 | fer-1-like 3, myoferlin (C. elegans)          | 3.51      |
| 201809_s_at | ENG    | endoglin (Osler-Rendu-Weber syndrome 1)       | 2.44      |

|             |         |                                                                                                 |           |
|-------------|---------|-------------------------------------------------------------------------------------------------|-----------|
| 201812_s_at | TOMM7   | translocase of outer<br>mitochondrial membrane 7<br>homolog (yeast)                             | 1.47      |
| 201816_s_at | GBAS    | glioblastoma amplified<br>sequence                                                              | 1.66      |
| 201820_at   | KRT5    | keratin 5 (epidermolysis bullosa<br>simplex, Dowling-<br>Meara/Kobner/Weber-<br>Cockayne types) | -<br>1.37 |
| 201828_x_at | FAM127A | family with sequence similarity<br>127, member A                                                | 1.4       |
| 201844_s_at | RYBP    | RING1 and YY1 binding<br>protein                                                                | 1.62      |
| 201846_s_at | RYBP    | RING1 and YY1 binding<br>protein                                                                | 1.67      |

|             |          |                                                                                         |           |
|-------------|----------|-----------------------------------------------------------------------------------------|-----------|
| 201852_x_at | COL3A1   | collagen, type III, alpha 1<br>(Ehlers-Danlos syndrome type<br>IV, autosomal dominant)  | 2.86      |
| 201870_at   | TOMM34   | translocase of outer<br>mitochondrial membrane 34                                       | -<br>1.33 |
| 201873_s_at | ABCE1    | ATP-binding cassette, sub-<br>family E (OABP), member 1                                 | -1.8      |
| 201880_at   | ARIH1    | ariadne homolog, ubiquitin-<br>conjugating enzyme E2 binding<br>protein, 1 (Drosophila) | 1.45      |
| 201886_at   | WDR23    | WD repeat domain 23                                                                     | -<br>1.69 |
| 201917_s_at | SLC25A36 | solute carrier family 25,<br>member 36                                                  | 2.27      |

|             |        |                                                                                                           |           |
|-------------|--------|-----------------------------------------------------------------------------------------------------------|-----------|
| 201922_at   | TINP1  | TGF beta-inducible nuclear protein 1                                                                      | 1.56      |
| 201944_at   | HEXB   | hexosaminidase B (beta polypeptide)                                                                       | 1.46      |
| 201993_x_at | HNRPDL | heterogeneous nuclear ribonucleoprotein D-like                                                            | 1.84      |
| 201999_s_at | DYNLT1 | dynein, light chain, Tctex-type 1                                                                         | 1.78      |
| 202011_at   | TJP1   | tight junction protein 1 (zona occludens 1)                                                               | 1.75      |
| 202021_x_at | EIF1   | eukaryotic translation initiation factor 1                                                                | 1.78      |
| 202048_s_at | CBX6   | chromobox homolog 6                                                                                       | -<br>1.54 |
| 202065_s_at | PPFIA1 | protein tyrosine phosphatase, receptor type, f polypeptide (PTPRF), interacting protein (liprin), alpha 1 | -<br>1.38 |

|             |         |                                                                                           |           |
|-------------|---------|-------------------------------------------------------------------------------------------|-----------|
| 202083_s_at | SEC14L1 | SEC14-like 1 ( <i>S. cerevisiae</i> )                                                     | 1.91      |
| 202084_s_at | SEC14L1 | SEC14-like 1 ( <i>S. cerevisiae</i> )                                                     | 1.83      |
| 202086_at   | MX1     | myxovirus (influenza virus)<br>resistance 1, interferon-<br>inducible protein p78 (mouse) | 5.97      |
| 202088_at   | SLC39A6 | solute carrier family 39 (zinc<br>transporter), member 6                                  | 1.81      |
| 202089_s_at | SLC39A6 | solute carrier family 39 (zinc<br>transporter), member 6                                  | 1.45      |
| 202099_s_at | DGCR2   | DiGeorge syndrome critical<br>region gene 2                                               | -<br>1.47 |
| 202116_at   | DPF2    | D4, zinc and double PHD<br>fingers family 2                                               | 1.53      |

|             |        |                                                                          |           |
|-------------|--------|--------------------------------------------------------------------------|-----------|
| 202141_s_at | COPS8  | COP9 constitutive<br>photomorphogenic homolog<br>subunit 8 (Arabidopsis) | 1.56      |
| 202147_s_at | IFRD1  | interferon-related<br>developmental regulator 1                          | 1.66      |
| 202150_s_at | NEDD9  | neural precursor cell expressed,<br>developmentally down-<br>regulated 9 | 2.55      |
| 202151_s_at | UBAC1  | UBA domain containing 1                                                  | -<br>1.37 |
| 202152_x_at | USF2   | upstream transcription factor 2,<br>c-fos interacting                    | -<br>1.58 |
| 202156_s_at | CUGBP2 | CUG triplet repeat, RNA<br>binding protein 2                             | 2.43      |
| 202158_s_at | CUGBP2 | CUG triplet repeat, RNA<br>binding protein 2                             | 1.99      |

|             |          |                                                                                            |           |
|-------------|----------|--------------------------------------------------------------------------------------------|-----------|
| 202159_at   | FARSA    | phenylalanyl-tRNA synthetase,<br>alpha subunit                                             | -<br>1.45 |
| 202165_at   | PPP1R2   | protein phosphatase 1,<br>regulatory (inhibitor) subunit 2                                 | 1.63      |
| 202171_at   | VEZF1    | vascular endothelial zinc finger<br>1                                                      | 1.94      |
| 202172_at   | VEZF1    | vascular endothelial zinc finger<br>1                                                      | 1.47      |
| 202181_at   | KIAA0247 | KIAA0247                                                                                   | 2.09      |
| 202196_s_at | DKK3     | dickkopf homolog 3 (Xenopus<br>laevis)                                                     | 2.52      |
| 202206_at   | ARL4C    | ADP-ribosylation factor-like<br>4C                                                         | 2.61      |
| 202223_at   | STT3A    | STT3, subunit of the<br>oligosaccharyltransferase<br>complex, homolog A (S.<br>cerevisiae) | -<br>2.48 |
| 202237_at   | NNMT     | nicotinamide N-<br>methyltransferase                                                       | -<br>1.51 |

|             |        |                                                                       |           |
|-------------|--------|-----------------------------------------------------------------------|-----------|
| 202251_at   | PRPF3  | PRP3 pre-mRNA processing<br>factor 3 homolog ( <i>S. cerevisiae</i> ) | 1.41      |
| 202257_s_at | CD2BP2 | CD2 (cytoplasmic tail) binding<br>protein 2                           | 1.27      |
| 202271_at   | FBXO28 | F-box protein 28                                                      | -<br>1.95 |
| 202292_x_at | LYPLA2 | lysophospholipase II                                                  | -1.5      |
| 202302_s_at | RSRC2  | arginine/serine-rich coiled-coil<br>2                                 | 1.65      |
| 202310_s_at | COL1A1 | collagen, type I, alpha 1                                             | 4.09      |
| 202317_s_at | UBE4B  | ubiquitination factor E4B<br>(UFD2 homolog, yeast)                    | -<br>1.51 |
| 202322_s_at | GGPS1  | geranylgeranyl diphosphate<br>synthase 1                              | 1.45      |
| 202326_at   | EHMT2  | euchromatic histone-lysine N-<br>methyltransferase 2                  | 1.3       |



|             |        |                                                             |           |
|-------------|--------|-------------------------------------------------------------|-----------|
| 202345_s_at | FABP5  | fatty acid binding protein 5<br>(psoriasis-associated)      | 3.9       |
| 202359_s_at | SNX19  | sorting nexin 19                                            | 1.48      |
| 202366_at   | ACADS  | acyl-Coenzyme A<br>dehydrogenase, C-2 to C-3<br>short chain | 1.83      |
| 202370_s_at | CBFB   | core-binding factor, beta<br>subunit                        | 1.99      |
| 202371_at   | TCEAL4 | transcription elongation factor<br>A (SII)-like 4           | 1.52      |
| 202390_s_at | HD     | huntingtin (Huntington disease)                             | 1.41      |
| 202391_at   | BASP1  | brain abundant, membrane<br>attached signal protein 1       | 1.86      |
| 202404_s_at | COL1A2 | collagen, type I, alpha 2                                   | 3.42      |
| 202411_at   | IFI27  | interferon, alpha-inducible<br>protein 27                   | 21.7<br>2 |

|             |         |                                                                |           |
|-------------|---------|----------------------------------------------------------------|-----------|
| 202419_at   | FVT1    | follicular lymphoma variant<br>translocation 1                 | -1.9      |
| 202421_at   | IGSF3   | immunoglobulin superfamily,<br>member 3                        | 1.43      |
| 202436_s_at | CYP1B1  | cytochrome P450, family 1,<br>subfamily B, polypeptide 1       | 3.02      |
| 202450_s_at | CTSK    | cathepsin K                                                    | 2.52      |
| 202476_s_at | TUBGCP2 | tubulin, gamma complex<br>associated protein 2                 | -1.2      |
| 202477_s_at | TUBGCP2 | tubulin, gamma complex<br>associated protein 2                 | -<br>1.27 |
| 202485_s_at | MBD2    | methyl-CpG binding domain<br>protein 2                         | -<br>1.28 |
| 202492_at   | ATG9A   | ATG9 autophagy related 9<br>homolog A ( <i>S. cerevisiae</i> ) | -<br>1.35 |
| 202499_s_at | SLC2A3  | solute carrier family 2<br>(facilitated glucose transporter),  | 3.48      |

|             |          |                                                                          |           |
|-------------|----------|--------------------------------------------------------------------------|-----------|
|             |          | member 3                                                                 |           |
| 202508_s_at | SNAP25   | synaptosomal-associated protein, 25kDa                                   | 1.64      |
| 202510_s_at | TNFAIP2  | tumor necrosis factor, alpha-induced protein 2                           | 2.5       |
| 202524_s_at | SPOCK2   | sparc/osteonectin, cwcv and kazal-like domains proteoglycan (testican) 2 | 1.84      |
| 202553_s_at | SYF2     | SYF2 homolog, RNA splicing factor ( <i>S. cerevisiae</i> )               | 1.49      |
| 202556_s_at | MCRS1    | microspherule protein 1                                                  | -<br>1.44 |
| 202568_s_at | MARK3    | MAP/microtubule affinity-regulating kinase 3                             | 1.5       |
| 202594_at   | LEPROTL1 | leptin receptor overlapping transcript-like 1                            | 1.81      |

|             |         |                                                                     |           |
|-------------|---------|---------------------------------------------------------------------|-----------|
| 202598_at   | S100A13 | S100 calcium binding protein<br>A13                                 | 2.12      |
| 202615_at   | GNAQ    | guanine nucleotide binding<br>protein (G protein), q<br>polypeptide | 1.35      |
| 202643_s_at | TNFAIP3 | tumor necrosis factor, alpha-<br>induced protein 3                  | 3.71      |
| 202644_s_at | TNFAIP3 | tumor necrosis factor, alpha-<br>induced protein 3                  | 3.58      |
| 202656_s_at | SERTAD2 | SERTA domain containing 2                                           | 2.07      |
| 202659_at   | PSMB10  | proteasome (prosome,<br>macropain) subunit, beta type,<br>10        | 1.82      |
| 202667_s_at | SLC39A7 | solute carrier family 39 (zinc<br>transporter), member 7            | -<br>1.63 |
| 202677_at   | RASA1   | RAS p21 protein activator<br>(GTPase activating protein) 1          | 1.63      |

|             |         |                                                                    |           |
|-------------|---------|--------------------------------------------------------------------|-----------|
| 202686_s_at | AXL     | AXL receptor tyrosine kinase                                       | 2.75      |
| 202698_x_at | COX4I1  | cytochrome c oxidase subunit<br>IV isoform 1                       | 1.25      |
| 202709_at   | FMOD    | fibromodulin                                                       | 2.48      |
| 202732_at   | PKIG    | protein kinase (cAMP-<br>dependent, catalytic) inhibitor<br>gamma  | 1.47      |
| 202743_at   | PIK3R3  | phosphoinositide-3-kinase,<br>regulatory subunit 3 (p55,<br>gamma) | 2.06      |
| 202744_at   | SLC20A2 | solute carrier family 20<br>(phosphate transporter),<br>member 2   | -<br>1.35 |
| 202746_at   | ITM2A   | integral membrane protein 2A                                       | 4.3       |
| 202747_s_at | ITM2A   | integral membrane protein 2A                                       | 1.84      |
| 202749_at   | WRB     | tryptophan rich basic protein                                      | -<br>1.64 |
| 202765_s_at | FBN1    | fibrillin 1                                                        | 1.73      |

|             |          |                                                                          |           |
|-------------|----------|--------------------------------------------------------------------------|-----------|
| 202766_s_at | FBN1     | fibrillin 1                                                              | 2.72      |
| 202769_at   | CCNG2    | cyclin G2                                                                | 2.21      |
| 202770_s_at | CCNG2    | cyclin G2                                                                | 1.66      |
| 202780_at   | OXCT1    | 3-oxoacid CoA transferase 1                                              | 1.61      |
| 202785_at   | NDUFA7   | NADH dehydrogenase<br>(ubiquinone) 1 alpha<br>subcomplex, 7, 14.5kDa     | 1.35      |
| 202786_at   | STK39    | serine threonine kinase 39<br>(STE20/SPS1 homolog, yeast)                | 2.39      |
| 202795_x_at | TRIOBP   | TRIO and F-actin binding<br>protein                                      | 1.62      |
| 202803_s_at | ITGB2    | integrin, beta 2 (complement<br>component 3 receptor 3 and 4<br>subunit) | 2.2       |
| 202808_at   | C10orf26 | chromosome 10 open reading<br>frame 26                                   | -<br>1.78 |

|             |          |                                                                                     |           |
|-------------|----------|-------------------------------------------------------------------------------------|-----------|
|             |          |                                                                                     |           |
| 202833_s_at | SERPINA1 | serpin peptidase inhibitor, clade A (alpha-1 antiproteinase, antitrypsin), member 1 | -<br>1.25 |
| 202838_at   | FUCA1    | fucosidase, alpha-L- 1, tissue                                                      | 1.68      |
| 202846_s_at | PIGC     | phosphatidylinositol glycan anchor biosynthesis, class C                            | 1.39      |
| 202849_x_at | GRK6     | G protein-coupled receptor kinase 6                                                 | -<br>1.64 |
| 202859_x_at | IL8      | interleukin 8                                                                       | 6.26      |

|             |         |                                                                               |           |
|-------------|---------|-------------------------------------------------------------------------------|-----------|
| 202861_at   | PER1    | period homolog 1 (Drosophila)                                                 | 1.86      |
| 202864_s_at | SP100   | SP100 nuclear antigen                                                         | 1.62      |
| 202869_at   | OAS1    | 2',5'-oligoadenylate synthetase<br>1, 40/46kDa                                | 3.44      |
| 202885_s_at | PPP2R1B | protein phosphatase 2 (formerly<br>2A), regulatory subunit A, beta<br>isoform | -<br>1.21 |
| 202887_s_at | DDIT4   | DNA-damage-inducible<br>transcript 4                                          | 2.9       |
| 2028_s_at   | E2F1    | E2F transcription factor 1                                                    | -<br>1.36 |
| 202902_s_at | CTSS    | cathepsin S                                                                   | 2.96      |
| 202908_at   | WFS1    | Wolfram syndrome 1<br>(wolframin)                                             | -1.6      |
| 202912_at   | ADM     | adrenomedullin                                                                | 3.21      |
| 202918_s_at | MOBK13  | MOB1, Mps One Binder kinase<br>activator-like 3 (yeast)                       | 1.71      |



|             |        |                                                     |           |
|-------------|--------|-----------------------------------------------------|-----------|
| 202924_s_at | PLAGL2 | pleiomorphic adenoma gene-like 2                    | -<br>1.36 |
| 202934_at   | HK2    | hexokinase 2                                        | 1.54      |
| 202953_at   | C1QB   | complement component 1, q subcomponent, B chain     | 3.03      |
| 202957_at   | HCLS1  | hematopoietic cell-specific Lyn substrate 1         | 2.51      |
| 202965_s_at | CAPN6  | calpain 6                                           | 1.38      |
| 202995_s_at | FBLN1  | fibulin 1                                           | 1.89      |
| 203000_at   | STMN2  | stathmin-like 2                                     | 2.77      |
| 203001_s_at | STMN2  | stathmin-like 2                                     | 3.23      |
| 203010_at   | STAT5A | signal transducer and activator of transcription 5A | -<br>1.28 |
| 203012_x_at | RPL23A | ribosomal protein L23a                              | 1.47      |
| 203013_at   | ECD    | ecdysoneless homolog (Drosophila)                   | 1.33      |

|             |          |                                                   |           |
|-------------|----------|---------------------------------------------------|-----------|
| 203020_at   | RABGAP1L | RAB GTPase activating protein<br>1-like           | 1.8       |
| 203024_s_at | C5orf15  | chromosome 5 open reading<br>frame 15             | 1.44      |
| 203028_s_at | CYBA     | cytochrome b-245, alpha<br>polypeptide            | 2.65      |
| 203038_at   | PTPRK    | protein tyrosine phosphatase,<br>receptor type, K | 1.55      |
| 203044_at   | CHSY1    | carbohydrate (chondroitin)<br>synthase 1          | 2.34      |
| 203061_s_at | NRM      | nurim (nuclear envelope<br>membrane protein)      | -<br>1.33 |
| 203065_s_at | CAV1     | caveolin 1, caveolae protein,<br>22kDa            | 3.4       |
| 203074_at   | ANXA8L2  | annexin A8-like 2                                 | 1.78      |
| 203075_at   | SMAD2    | SMAD family member 2                              | 1.7       |
| 203083_at   | THBS2    | thrombospondin 2                                  | 2.4       |

|             |         |                                                                                                                 |           |
|-------------|---------|-----------------------------------------------------------------------------------------------------------------|-----------|
| 203085_s_at | TGFB1   | transforming growth factor,<br>beta 1                                                                           | 2.27      |
| 203093_s_at | TIMM44  | translocase of inner<br>mitochondrial membrane 44<br>homolog (yeast)                                            | -<br>1.49 |
| 203104_at   | CSF1R   | colony stimulating factor 1<br>receptor, formerly McDonough<br>feline sarcoma viral (v-fms)<br>oncogene homolog | 2.38      |
| 203124_s_at | SLC11A2 | solute carrier family 11<br>(proton-coupled divalent metal<br>ion transporters), member 2                       | -<br>2.09 |
| 203125_x_at | SLC11A2 | solute carrier family 11<br>(proton-coupled divalent metal<br>ion transporters), member 2                       | -<br>1.56 |
| 203139_at   | DAPK1   | death-associated protein kinase<br>1                                                                            | 1.86      |

|             |          |                                                                        |           |
|-------------|----------|------------------------------------------------------------------------|-----------|
|             |          |                                                                        |           |
| 203153_at   | IFIT1    | interferon-induced protein with<br>tetratricopeptide repeats 1         | 9.07      |
| 203161_s_at | RNF8     | ring finger protein 8                                                  | -1.2      |
| 203166_at   | CFDP1    | craniofacial development<br>protein 1                                  | 1.86      |
| 203177_x_at | TFAM     | transcription factor A,<br>mitochondrial                               | -<br>1.74 |
| 203185_at   | RASSF2   | Ras association (RalGDS/AF-<br>6) domain family 2                      | 2.01      |
| 203197_s_at | C1orf123 | chromosome 1 open reading<br>frame 123                                 | 1.28      |
| 203211_s_at | MTMR2    | myotubularin related protein 2                                         | 1.76      |
| 203221_at   | TLE1     | transducin-like enhancer of<br>split 1 (E(sp1) homolog,<br>Drosophila) | 1.84      |
| 203235_at   | THOP1    | thimet oligopeptidase 1                                                | -<br>1.77 |

|             |         |                                                                        |           |
|-------------|---------|------------------------------------------------------------------------|-----------|
| 203236_s_at | LGALS9  | lectin, galactoside-binding,<br>soluble, 9 (galectin 9)                | 1.62      |
| 203237_s_at | NOTCH3  | Notch homolog 3 (Drosophila)                                           | -<br>1.29 |
| 203241_at   | UVRAG   | UV radiation resistance<br>associated gene                             | 1.43      |
| 203249_at   | EZH1    | enhancer of zeste homolog 1<br>(Drosophila)                            | 1.69      |
| 203252_at   | CDK2AP2 | CDK2-associated protein 2                                              | -<br>1.89 |
| 203267_s_at | DRG2    | developmentally regulated GTP<br>binding protein 2                     | -<br>1.34 |
| 203269_at   | NSMAF   | neutral sphingomyelinase (N-<br>SMase) activation associated<br>factor | 1.61      |

|             |       |                                                                                                                         |           |
|-------------|-------|-------------------------------------------------------------------------------------------------------------------------|-----------|
| 203282_at   | GBE1  | glucan (1,4-alpha-), branching enzyme 1 (glycogen branching enzyme, Andersen disease, glycogen storage disease type IV) | -<br>1.64 |
| 203301_s_at | DMTF1 | cyclin D binding myb-like transcription factor 1                                                                        | 1.9       |
| 203302_at   | DCK   | deoxycytidine kinase                                                                                                    | 2.63      |
| 203304_at   | BAMBI | BMP and activin membrane-bound inhibitor homolog (Xenopus laevis)                                                       | 2.55      |
| 203309_s_at | HPS1  | Hermansky-Pudlak syndrome 1                                                                                             | -<br>1.26 |
| 203313_s_at | TGIF1 | TGFB-induced factor homeobox 1                                                                                          | 2.16      |
| 203324_s_at | CAV2  | caveolin 2                                                                                                              | 2.28      |

|             |         |                                                                                                           |      |
|-------------|---------|-----------------------------------------------------------------------------------------------------------|------|
| 203329_at   | PTPRM   | protein tyrosine phosphatase,<br>receptor type, M                                                         | 1.73 |
| 203333_at   | KIFAP3  | kinesin-associated protein 3                                                                              | 1.73 |
| 203379_at   | RPS6KA1 | ribosomal protein S6 kinase,<br>90kDa, polypeptide 1                                                      | 1.34 |
| 203380_x_at | SFRS5   | splicing factor, arginine/serine-<br>rich 5                                                               | 1.57 |
| 203385_at   | DGKA    | diacylglycerol kinase, alpha<br>80kDa                                                                     | 1.59 |
| 203386_at   | TBC1D4  | TBC1 domain family, member<br>4                                                                           | 1.56 |
| 203397_s_at | GALNT3  | UDP-N-acetyl-alpha-D-<br>galactosamine:polypeptide N-<br>acetylgalactosaminyltransferase<br>3 (GalNAc-T3) | 1.88 |
| 203404_at   | ARMCX2  | armadillo repeat containing, X-<br>linked 2                                                               | 1.57 |
| 203416_at   | CD53    | CD53 molecule                                                                                             | 3.71 |

|             |          |                                                          |           |
|-------------|----------|----------------------------------------------------------|-----------|
| 203423_at   | RBP1     | retinol binding protein 1,<br>cellular                   | 4.11      |
| 203435_s_at | MME      | membrane metallo-<br>endopeptidase                       | -<br>2.22 |
| 203436_at   | RPP30    | ribonuclease P/MRP 30kDa<br>subunit                      | 1.45      |
| 203457_at   | STX7     | syntaxin 7                                               | 1.4       |
| 203461_at   | CHD2     | chromodomain helicase DNA<br>binding protein 2           | -<br>1.22 |
| 203476_at   | TPBG     | trophoblast glycoprotein                                 | 1.77      |
| 203485_at   | RTN1     | reticulon 1                                              | 1.53      |
| 203505_at   | ABCA1    | ATP-binding cassette, sub-<br>family A (ABC1), member 1  | -<br>1.94 |
| 203508_at   | TNFRSF1B | tumor necrosis factor receptor<br>superfamily, member 1B | 1.83      |



|             |        |                                                                                                                              |           |
|-------------|--------|------------------------------------------------------------------------------------------------------------------------------|-----------|
| 203522_at   | CCS    | copper chaperone for<br>superoxide dismutase                                                                                 | -<br>1.44 |
| 203523_at   | LSP1   | lymphocyte-specific protein 1                                                                                                | 1.42      |
| 203528_at   | SEMA4D | sema domain, immunoglobulin<br>domain (Ig), transmembrane<br>domain (TM) and short<br>cytoplasmic domain,<br>(semaphorin) 4D | 1.58      |
| 203546_at   | IPO13  | importin 13                                                                                                                  | -<br>1.32 |
| 203550_s_at | C1orf2 | chromosome 1 open reading<br>frame 2                                                                                         | -<br>1.39 |
| 203561_at   | FCGR2A | Fc fragment of IgG, low<br>affinity IIa, receptor (CD32)                                                                     | 2.41      |
| 203563_at   | AFAP1  | actin filament associated<br>protein 1                                                                                       | 1.13      |

|             |        |                                                                                                                     |           |
|-------------|--------|---------------------------------------------------------------------------------------------------------------------|-----------|
| 203566_s_at | AGL    | amylo-1, 6-glucosidase, 4-alpha-glucanotransferase (glycogen debranching enzyme, glycogen storage disease type III) | -<br>2.31 |
| 203569_s_at | OFD1   | oral-facial-digital syndrome 1                                                                                      | 2.07      |
| 203570_at   | LOXL1  | lysyl oxidase-like 1                                                                                                | 2.2       |
| 203602_s_at | ZBTB17 | zinc finger and BTB domain containing 17                                                                            | -<br>1.54 |
| 203620_s_at | FCHSD2 | FCH and double SH3 domains 2                                                                                        | 1.78      |
| 203633_at   | CPT1A  | carnitine palmitoyltransferase 1A (liver)                                                                           | 2.96      |
| 203636_at   | MID1   | midline 1 (Opitz/BBB syndrome)                                                                                      | 1.96      |
| 203643_at   | ERF    | Ets2 repressor factor                                                                                               | 1.67      |

|             |         |                                                                  |           |
|-------------|---------|------------------------------------------------------------------|-----------|
| 203650_at   | PROCR   | protein C receptor, endothelial<br>(EPCR)                        | 1.97      |
| 203656_at   | FIG4    | FIG4 homolog ( <i>S. cerevisiae</i> )                            | 1.41      |
| 203680_at   | PRKAR2B | protein kinase, cAMP-<br>dependent, regulatory, type II,<br>beta | 2.17      |
| 203688_at   | PKD2    | polycystic kidney disease 2<br>(autosomal dominant)              | 1.94      |
| 203697_at   | FRZB    | frizzled-related protein                                         | 3.17      |
| 203698_s_at | FRZB    | frizzled-related protein                                         | 2.12      |
| 203703_s_at | TTL4    | tubulin tyrosine ligase-like<br>family, member 4                 | -<br>1.33 |
| 203705_s_at | FZD7    | frizzled homolog 7<br>( <i>Drosophila</i> )                      | 1.83      |

|             |         |                                                                                       |      |
|-------------|---------|---------------------------------------------------------------------------------------|------|
| 203708_at   | PDE4B   | phosphodiesterase 4B, cAMP-specific (phosphodiesterase E4 duncce homolog, Drosophila) | 2.73 |
| 203718_at   | PNPLA6  | patatin-like phospholipase domain containing 6                                        | 1.43 |
| 203725_at   | GADD45A | growth arrest and DNA-damage-inducible, alpha                                         | 2.62 |
| 203726_s_at | LAMA3   | laminin, alpha 3                                                                      | 1.38 |
| 203729_at   | EMP3    | epithelial membrane protein 3                                                         | 2.27 |
| 203760_s_at | SLA     | Src-like-adaptor                                                                      | 1.94 |
| 203766_s_at | LMOD1   | leiomodrin 1 (smooth muscle)                                                          | 1.49 |
| 203787_at   | SSBP2   | single-stranded DNA binding protein 2                                                 | 1.68 |

|             |        |                                                                           |           |
|-------------|--------|---------------------------------------------------------------------------|-----------|
| 203851_at   | IGFBP6 | insulin-like growth factor<br>binding protein 6                           | 2.73      |
| 203864_s_at | ACTN2  | actinin, alpha 2                                                          | -<br>1.26 |
| 203867_s_at | NLE1   | notchless homolog 1<br>(Drosophila)                                       | -1.3      |
| 203879_at   | PIK3CD | phosphoinositide-3-kinase,<br>catalytic, delta polypeptide                | 1.4       |
| 203887_s_at | THBD   | thrombomodulin                                                            | 3.03      |
| 203898_at   | RCP9   | calcitonin gene-related peptide-<br>receptor component protein            | -<br>1.59 |
| 203903_s_at | HEPH   | hephaestin                                                                | 2.09      |
| 203908_at   | SLC4A4 | solute carrier family 4, sodium<br>bicarbonate cotransporter,<br>member 4 | 2.66      |
| 203915_at   | CXCL9  | chemokine (C-X-C motif)<br>ligand 9                                       | 6.7       |

|             |         |                                                             |           |
|-------------|---------|-------------------------------------------------------------|-----------|
| 203919_at   | TCEA2   | transcription elongation factor<br>A (SII), 2               | 3.07      |
| 203943_at   | KIF3B   | kinesin family member 3B                                    | -<br>1.57 |
| 203944_x_at | BTN2A1  | butyrophilin, subfamily 2,<br>member A1                     | 1.5       |
| 203962_s_at | NEBL    | nebulette                                                   | 1.66      |
| 203971_at   | SLC31A1 | solute carrier family 31 (copper<br>transporters), member 1 | -<br>2.12 |
| 203988_s_at | FUT8    | fucosyltransferase 8 (alpha<br>(1,6) fucosyltransferase)    | 1.45      |
| 204000_at   | GNB5    | guanine nucleotide binding<br>protein (G protein), beta 5   | 1.73      |
| 204005_s_at | PAWR    | PRKC, apoptosis, WT1,<br>regulator                          | 1.63      |
| 204014_at   | DUSP4   | dual specificity phosphatase 4                              | 1.74      |

|             |        |                                                                                         |           |
|-------------|--------|-----------------------------------------------------------------------------------------|-----------|
| 204015_s_at | DUSP4  | dual specificity phosphatase 4                                                          | 1.58      |
| 204018_x_at | HBA1   | hemoglobin, alpha 1                                                                     | 5.55      |
| 204036_at   | EDG2   | endothelial differentiation,<br>lysophosphatidic acid G-<br>protein-coupled receptor, 2 | 1.83      |
| 204045_at   | TCEAL1 | transcription elongation factor<br>A (SII)-like 1                                       | 1.9       |
| 204053_x_at | PTEN   | phosphatase and tensin<br>homolog (mutated in multiple<br>advanced cancers 1)           | 1.8       |
| 204056_s_at | MVK    | mevalonate kinase (mevalonic<br>aciduria)                                               | -<br>1.49 |
| 204057_at   | IRF8   | interferon regulatory factor 8                                                          | 2.13      |
| 204061_at   | PRKX   | protein kinase, X-linked                                                                | 1.6       |

|             |         |                                                                    |           |
|-------------|---------|--------------------------------------------------------------------|-----------|
| 204077_x_at | ENTPD4  | ectonucleoside triphosphate<br>diphosphohydrolase 4                | -<br>1.41 |
| 204103_at   | CCL4    | chemokine (C-C motif) ligand<br>4                                  | 2.73      |
| 204118_at   | CD48    | CD48 molecule                                                      | 2.97      |
| 204120_s_at | ADK     | adenosine kinase                                                   | -<br>2.56 |
| 204122_at   | TYROBP  | TYRO protein tyrosine kinase<br>binding protein                    | 3.82      |
| 204123_at   | LIG3    | ligase III, DNA, ATP-<br>dependent                                 | -<br>1.27 |
| 204132_s_at | FOXO3   | forkhead box O3                                                    | 2.24      |
| 204162_at   | NDC80   | NDC80 homolog, kinetochore<br>complex component (S.<br>cerevisiae) | 1.34      |
| 204163_at   | EMILIN1 | elastin microfibril interfacier 1                                  | 2.04      |



|             |          |                                                                                              |      |
|-------------|----------|----------------------------------------------------------------------------------------------|------|
| 204174_at   | ALOX5AP  | arachidonate 5-lipoxygenase-activating protein                                               | 2.75 |
| 204179_at   | MB       | myoglobin                                                                                    | -1.4 |
| 204187_at   | GMPR     | guanosine monophosphate reductase                                                            | 1.56 |
| 204192_at   | CD37     | CD37 molecule                                                                                | 2.58 |
| 204197_s_at | RUNX3    | runt-related transcription factor<br>3                                                       | 1.77 |
| 204198_s_at | RUNX3    | runt-related transcription factor<br>3                                                       | 1.98 |
| 204201_s_at | PTPN13   | protein tyrosine phosphatase, non-receptor type 13 (APO-1/CD95 (Fas)-associated phosphatase) | 2.24 |
| 204205_at   | APOBEC3G | apolipoprotein B mRNA editing enzyme, catalytic polypeptide-like 3G                          | 3    |

|             |         |                                                          |           |
|-------------|---------|----------------------------------------------------------|-----------|
| 204209_at   | PCYT1A  | phosphate cytidyltransferase<br>1, choline, alpha        | -<br>1.42 |
| 204215_at   | C7orf23 | chromosome 7 open reading<br>frame 23                    | 2.57      |
| 204221_x_at | GLIPR1  | GLI pathogenesis-related 1<br>(glioma)                   | 1.78      |
| 204222_s_at | GLIPR1  | GLI pathogenesis-related 1<br>(glioma)                   | 2.58      |
| 204223_at   | PRELP   | proline/arginine-rich end<br>leucine-rich repeat protein | 2.5       |
| 204228_at   | PPIH    | peptidylprolyl isomerase H<br>(cyclophilin H)            | 1.46      |
| 204234_s_at | ZNF195  | zinc finger protein 195                                  | 1.5       |
| 204236_at   | FLI1    | Friend leukemia virus<br>integration 1                   | 1.98      |
| 204249_s_at | LMO2    | LIM domain only 2<br>(rhombotin-like 1)                  | 1.65      |

|             |        |                                                                                           |      |
|-------------|--------|-------------------------------------------------------------------------------------------|------|
| 204252_at   | CDK2   | cyclin-dependent kinase 2                                                                 | 1.32 |
| 204267_x_at | PKMYT1 | protein kinase, membrane associated tyrosine/threonine 1                                  | 1.42 |
| 204269_at   | PIM2   | pim-2 oncogene                                                                            | 1.33 |
| 204271_s_at | EDNRB  | endothelin receptor type B                                                                | 2.69 |
| 204273_at   | EDNRB  | endothelin receptor type B                                                                | 2.52 |
| 204279_at   | PSMB9  | proteasome (prosome, macropain) subunit, beta type, 9 (large multifunctional peptidase 2) | 2.08 |
| 204285_s_at | PMAIP1 | phorbol-12-myristate-13-acetate-induced protein 1                                         | 1.29 |

|             |         |                                                                                 |           |
|-------------|---------|---------------------------------------------------------------------------------|-----------|
| 204286_s_at | PMAIP1  | phorbol-12-myristate-13-acetate-induced protein 1                               | 1.28      |
| 204301_at   | KBTBD11 | kelch repeat and BTB (POZ) domain containing 11                                 | -1.5      |
| 204304_s_at | PROM1   | prominin 1                                                                      | 3.95      |
| 204312_x_at | CREB1   | cAMP responsive element binding protein 1                                       | 1.44      |
| 204313_s_at | CREB1   | cAMP responsive element binding protein 1                                       | 1.43      |
| 204316_at   | RGS10   | regulator of G-protein signaling 10                                             | 1.22      |
| 204319_s_at | RGS10   | regulator of G-protein signaling 10                                             | 3.18      |
| 204325_s_at | NF1     | neurofibromin 1 (neurofibromatosis, von Recklinghausen disease, Watson disease) | -<br>1.19 |
| 204326_x_at | MT1X    | metallothionein 1X                                                              | -<br>1.99 |

|             |          |                                                                                      |           |
|-------------|----------|--------------------------------------------------------------------------------------|-----------|
| 204342_at   | SLC25A24 | solute carrier family 25<br>(mitochondrial carrier;<br>phosphate carrier), member 24 | 1.9       |
| 204352_at   | TRAF5    | TNF receptor-associated factor<br>5                                                  | 2.05      |
| 204368_at   | SLCO2A1  | solute carrier organic anion<br>transporter family, member<br>2A1                    | 1.64      |
| 204385_at   | KYNU     | kynureninase (L-kynurenine<br>hydrolase)                                             | -1.6      |
| 204388_s_at | MAOA     | monoamine oxidase A                                                                  | -<br>2.38 |
| 204389_at   | MAOA     | monoamine oxidase A                                                                  | -<br>1.98 |
| 204393_s_at | ACPP     | acid phosphatase, prostate                                                           | -<br>1.14 |
| 204396_s_at | GRK5     | G protein-coupled receptor<br>kinase 5                                               | 1.89      |
| 204402_at   | RHBDD3   | rhomboid domain containing 3                                                         | -1.4      |

|             |         |                                                                                    |      |
|-------------|---------|------------------------------------------------------------------------------------|------|
| 204404_at   | SLC12A2 | solute carrier family 12<br>(sodium/potassium/chloride<br>transporters), member 2  | 1.71 |
| 204429_s_at | SLC2A5  | solute carrier family 2<br>(facilitated glucose/fructose<br>transporter), member 5 | -1.4 |
| 204439_at   | IFI44L  | interferon-induced protein 44-<br>like                                             | 7.49 |
| 204451_at   | FZD1    | frizzled homolog 1<br>(Drosophila)                                                 | 2.59 |
| 204454_at   | LDOC1   | leucine zipper, down-regulated<br>in cancer 1                                      | 1.51 |
| 204457_s_at | GAS1    | growth arrest-specific 1                                                           | 5.63 |
| 204490_s_at | CD44    | CD44 molecule (Indian blood<br>group)                                              | 1.89 |

|             |        |                                                                                       |       |
|-------------|--------|---------------------------------------------------------------------------------------|-------|
| 204491_at   | PDE4D  | phosphodiesterase 4D, cAMP-specific (phosphodiesterase E3 duncce homolog, Drosophila) | 2.09  |
| 204498_s_at | ADCY9  | adenylate cyclase 9                                                                   | 1.35  |
| 204516_at   | ATXN7  | ataxin 7                                                                              | 2.01  |
| 204519_s_at | PLLP   | plasma membrane proteolipid (plasmolipin)                                             | 1.74  |
| 204526_s_at | TBC1D8 | TBC1 domain family, member 8 (with GRAM domain)                                       | 1.82  |
| 204533_at   | CXCL10 | chemokine (C-X-C motif) ligand 10                                                     | 10.89 |
| 204537_s_at | GABRE  | gamma-aminobutyric acid (GABA) A receptor, epsilon                                    | 1.67  |

|             |         |                                                                                     |           |
|-------------|---------|-------------------------------------------------------------------------------------|-----------|
| 204538_x_at | NPIP    | nuclear pore complex<br>interacting protein                                         | 1.41      |
| 204552_at   |         | NA                                                                                  | 1.69      |
| 204554_at   | PPP1R3D | protein phosphatase 1,<br>regulatory (inhibitor) subunit<br>3D                      | 1.24      |
| 204557_s_at | DZIP1   | DAZ interacting protein 1                                                           | 1.32      |
| 204558_at   | RAD54L  | RAD54-like ( <i>S. cerevisiae</i> )                                                 | -<br>1.28 |
| 204559_s_at | LSM7    | LSM7 homolog, U6 small<br>nuclear RNA associated ( <i>S.</i><br><i>cerevisiae</i> ) | 1.49      |
| 204583_x_at | KLK3    | kallikrein-related peptidase 3                                                      | -<br>1.22 |
| 204586_at   | BSN     | bassoon (presynaptic<br>cytomatrix protein)                                         | -<br>1.19 |
| 204595_s_at | STC1    | stanniocalcin 1                                                                     | 2.37      |
| 204597_x_at | STC1    | stanniocalcin 1                                                                     | 2.26      |
| 204606_at   | CCL21   | chemokine (C-C motif) ligand<br>21                                                  | 5.35      |



|             |        |                                                             |           |
|-------------|--------|-------------------------------------------------------------|-----------|
| 204613_at   | PLCG2  | phospholipase C, gamma 2<br>(phosphatidylinositol-specific) | 1.95      |
| 204619_s_at | VCAN   | versican                                                    | 2.26      |
| 204643_s_at | ENOX2  | ecto-NOX disulfide-thiol<br>exchanger 2                     | -<br>1.54 |
| 204655_at   | CCL5   | chemokine (C-C motif) ligand<br>5                           | 4.02      |
| 204661_at   | CD52   | CD52 molecule                                               | 3.71      |
| 204682_at   | LTBP2  | latent transforming growth<br>factor beta binding protein 2 | 1.75      |
| 204683_at   | ICAM2  | intercellular adhesion molecule<br>2                        | 1.59      |
| 204688_at   | SGCE   | sarcoglycan, epsilon                                        | 2.53      |
| 204698_at   | ISG20  | interferon stimulated<br>exonuclease gene 20kDa             | 3.33      |
| 204701_s_at | STOML1 | stomatin (EPB72)-like 1                                     | -<br>1.43 |
| 204702_s_at | NFE2L3 | nuclear factor (erythroid-                                  | 1.3       |

|             |        |                                                                                             |           |
|-------------|--------|---------------------------------------------------------------------------------------------|-----------|
|             |        | derived 2)-like 3                                                                           |           |
| 204723_at   | SCN3B  | sodium channel, voltage-gated,<br>type III, beta                                            | -<br>1.19 |
| 204735_at   | PDE4A  | phosphodiesterase 4A, cAMP-<br>specific (phosphodiesterase E2<br>dunce homolog, Drosophila) | 1.31      |
| 204743_at   | TAGLN3 | transgelin 3                                                                                | -1.4      |
| 204745_x_at | MT1G   | metallothionein 1G                                                                          | -<br>2.67 |
| 204747_at   | IFIT3  | interferon-induced protein with<br>tetratricopeptide repeats 3                              | 2.16      |
| 204757_s_at | TMEM24 | transmembrane protein 24                                                                    | -<br>1.39 |

|             |         |                                                                                       |           |
|-------------|---------|---------------------------------------------------------------------------------------|-----------|
| 204759_at   | RCBTB2  | regulator of chromosome condensation (RCC1) and BTB (POZ) domain containing protein 2 | 1.97      |
| 204765_at   | ARHGEF5 | Rho guanine nucleotide exchange factor (GEF) 5                                        | -<br>1.47 |
| 204774_at   | EVI2A   | ecotropic viral integration site 2A                                                   | 4.66      |
| 204780_s_at | FAS     | Fas (TNF receptor superfamily, member 6)                                              | 2.19      |
| 204781_s_at | FAS     | Fas (TNF receptor superfamily, member 6)                                              | 1.67      |
| 204790_at   | SMAD7   | SMAD family member 7                                                                  | 2.39      |
| 204794_at   | DUSP2   | dual specificity phosphatase 2                                                        | 1.64      |

|             |        |                                                               |      |
|-------------|--------|---------------------------------------------------------------|------|
| 204806_x_at | HLA-F  | major histocompatibility complex, class I, F                  | 2.13 |
| 204820_s_at | BTN3A3 | butyrophilin, subfamily 3, member A3                          | 2.52 |
| 204821_at   | BTN3A3 | butyrophilin, subfamily 3, member A3                          | 1.88 |
| 204823_at   | NAV3   | neuron navigator 3                                            | 2.02 |
| 204829_s_at | FOLR2  | folate receptor 2 (fetal)                                     | 1.66 |
| 204834_at   | FGL2   | fibrinogen-like 2                                             | 4.07 |
| 204838_s_at | MLH3   | mutL homolog 3 (E. coli)                                      | 1.62 |
| 204856_at   | B3GNT3 | UDP-GlcNAc:betaGal beta-1,3-N-acetylglucosaminyltransferase 3 | 1.41 |
| 204857_at   | MAD1L1 | MAD1 mitotic arrest deficient-like 1 (yeast)                  | 1.75 |
| 204881_s_at | UGCG   | UDP-glucose ceramide glucosyltransferase                      | 3.16 |

|             |          |                                                                        |           |
|-------------|----------|------------------------------------------------------------------------|-----------|
|             |          |                                                                        |           |
| 204882_at   | ARHGAP25 | Rho GTPase activating protein<br>25                                    | 1.72      |
| 204891_s_at | LCK      | lymphocyte-specific protein<br>tyrosine kinase                         | 1.83      |
| 204894_s_at | AOC3     | amine oxidase, copper<br>containing 3 (vascular adhesion<br>protein 1) | 2.12      |
| 204897_at   | PTGER4   | prostaglandin E receptor 4<br>(subtype EP4)                            | 5.43      |
| 204900_x_at | SAP30    | Sin3A-associated protein,<br>30kDa                                     | 2         |
| 204912_at   | IL10RA   | interleukin 10 receptor, alpha                                         | 2.16      |
| 204930_s_at | BNIP1    | BCL2/adenovirus E1B 19kDa<br>interacting protein 1                     | -<br>1.37 |
| 204931_at   | TCF21    | transcription factor 21                                                | 1.93      |

|             |         |                                                                         |           |
|-------------|---------|-------------------------------------------------------------------------|-----------|
| 204952_at   | LYPD3   | LY6/PLAUR domain<br>containing 3                                        | -1.3      |
| 204955_at   | SRPX    | sushi-repeat-containing protein,<br>X-linked                            | 3.01      |
| 204960_at   | PTPRCAP | protein tyrosine phosphatase,<br>receptor type, C-associated<br>protein | 1.42      |
| 204972_at   | OAS2    | 2'-5'-oligoadenylate synthetase<br>2, 69/71kDa                          | 2.87      |
| 204984_at   | GPC4    | glypican 4                                                              | 2.46      |
| 204988_at   | FGB     | fibrinogen beta chain                                                   | -<br>1.34 |
| 204994_at   | MX2     | myxovirus (influenza virus)<br>resistance 2 (mouse)                     | 1.85      |
| 204998_s_at | ATF5    | activating transcription factor 5                                       | -3.4      |
| 204999_s_at | ATF5    | activating transcription factor 5                                       | -<br>4.49 |
| 205004_at   | NKRF    | NF-kappaB repressing factor                                             | -<br>1.28 |

|             |       |                                                                                                             |           |
|-------------|-------|-------------------------------------------------------------------------------------------------------------|-----------|
| 205020_s_at | ARL4A | ADP-ribosylation factor-like<br>4A                                                                          | 1.44      |
| 205043_at   | CFTR  | cystic fibrosis transmembrane<br>conductance regulator (ATP-<br>binding cassette sub-family C,<br>member 7) | 3.82      |
| 205044_at   | GABRP | gamma-aminobutyric acid<br>(GABA) A receptor, pi                                                            | 2.62      |
| 205065_at   | ENPP1 | ectonucleotide<br>pyrophosphatase/phosphodiesterase<br>1                                                    | -<br>1.13 |
| 205066_s_at | ENPP1 | ectonucleotide<br>pyrophosphatase/phosphodiesterase<br>1                                                    | -<br>2.14 |

|             |          |                                                                                                        |           |
|-------------|----------|--------------------------------------------------------------------------------------------------------|-----------|
| 205075_at   | SERPINF2 | serpin peptidase inhibitor, clade F (alpha-2 antiplasmin, pigment epithelium derived factor), member 2 | -<br>1.93 |
| 205083_at   | AOX1     | aldehyde oxidase 1                                                                                     | -<br>2.29 |
| 205094_at   | PEX12    | peroxisomal biogenesis factor 12                                                                       | -<br>1.51 |
| 205110_s_at | FGF13    | fibroblast growth factor 13                                                                            | 1.37      |
| 205111_s_at | PLCE1    | phospholipase C, epsilon 1                                                                             | 1.24      |
| 205114_s_at | CCL3     | chemokine (C-C motif) ligand 3                                                                         | 2.14      |
| 205120_s_at | SGCB     | sarcoglycan, beta (43kDa dystrophin-associated glycoprotein)                                           | 2.1       |
| 205149_s_at | CLCN4    | chloride channel 4                                                                                     | -<br>1.21 |



|             |         |                                                        |           |
|-------------|---------|--------------------------------------------------------|-----------|
| 205153_s_at | CD40    | CD40 molecule, TNF receptor superfamily member 5       | 1.38      |
| 205173_x_at | CD58    | CD58 molecule                                          | 2.03      |
| 205174_s_at | QPCT    | glutaminy-peptide cyclotransferase (glutaminy cyclase) | 1.29      |
| 205175_s_at | KHK     | ketoheokinase (fructokinase)                           | 1.88      |
| 205189_s_at | FANCC   | Fanconi anemia, complementation group C                | -<br>2.33 |
| 205214_at   | STK17B  | serine/threonine kinase 17b                            | 1.93      |
| 205227_at   | IL1RAP  | interleukin 1 receptor accessory protein               | -<br>2.02 |
| 205238_at   | CXorf34 | chromosome X open reading frame 34                     | -<br>1.48 |

|             |         |                                                                                   |           |
|-------------|---------|-----------------------------------------------------------------------------------|-----------|
| 205239_at   | AREG    | amphiregulin (schwannoma-derived growth factor)                                   | 3.96      |
| 205256_at   | ZBTB39  | zinc finger and BTB domain containing 39                                          | -<br>1.27 |
| 205260_s_at | ACYP1   | acylphosphatase 1, erythrocyte (common) type                                      | 1.53      |
| 205261_at   | PGC     | progastricsin (pepsinogen C)                                                      | -<br>1.41 |
| 205267_at   | POU2AF1 | POU class 2 associating factor 1                                                  | 3.65      |
| 205269_at   | LCP2    | lymphocyte cytosolic protein 2 (SH2 domain containing leukocyte protein of 76kDa) | 3.94      |

|             |        |                                                                                         |           |
|-------------|--------|-----------------------------------------------------------------------------------------|-----------|
| 205270_s_at | LCP2   | lymphocyte cytosolic protein 2<br>(SH2 domain containing<br>leukocyte protein of 76kDa) | 2.25      |
| 205288_at   | CDC14A | CDC14 cell division cycle 14<br>homolog A ( <i>S. cerevisiae</i> )                      | 1.24      |
| 205290_s_at | BMP2   | bone morphogenetic protein 2                                                            | 1.52      |
| 205293_x_at | BAIAP2 | BAI1-associated protein 2                                                               | -<br>1.48 |
| 205315_s_at | SNTB2  | syntrophin, beta 2 (dystrophin-<br>associated protein A1, 59kDa,<br>basic component 2)  | 1.46      |
| 205318_at   | KIF5A  | kinesin family member 5A                                                                | -<br>1.43 |
| 205336_at   | PVALB  | parvalbumin                                                                             | -<br>1.23 |

|             |        |                                                            |           |
|-------------|--------|------------------------------------------------------------|-----------|
| 205354_at   | GAMT   | guanidinoacetate N-methyltransferase                       | -<br>1.96 |
| 205359_at   | AKAP6  | A kinase (PRKA) anchor protein 6                           | -<br>1.33 |
| 205381_at   | LRRC17 | leucine rich repeat containing 17                          | 2.52      |
| 205383_s_at | ZBTB20 | zinc finger and BTB domain containing 20                   | 1.8       |
| 205399_at   | DCLK1  | doublecortin-like kinase 1                                 | 1.26      |
| 205407_at   | RECK   | reversion-inducing-cysteine-rich protein with kazal motifs | 2.44      |
| 205431_s_at | BMP5   | bone morphogenetic protein 5                               | 1.38      |
| 205434_s_at | AAK1   | AP2 associated kinase 1                                    | 1.56      |
| 205445_at   | PRL    | prolactin                                                  | -<br>1.27 |

|             |        |                                                                                     |           |
|-------------|--------|-------------------------------------------------------------------------------------|-----------|
|             |        |                                                                                     | -         |
| 205449_at   | SAC3D1 | SAC3 domain containing 1                                                            | 1.74      |
| 205466_s_at | HS3ST1 | heparan sulfate (glucosamine)<br>3-O-sulfotransferase 1                             | 1.93      |
| 205477_s_at | AMBP   | alpha-1-microglobulin/bikunin<br>precursor                                          | -<br>1.32 |
| 205483_s_at | ISG15  | ISG15 ubiquitin-like modifier                                                       | 7.65      |
| 205488_at   | GZMA   | granzyme A (granzyme 1,<br>cytotoxic T-lymphocyte-<br>associated serine esterase 3) | 3.58      |
| 205491_s_at | GJB3   | gap junction protein, beta 3,<br>31kDa                                              | -<br>1.18 |
| 205492_s_at | DPYSL4 | dihydropyrimidinase-like 4                                                          | -<br>1.27 |
| 205514_at   | ZNF415 | zinc finger protein 415                                                             | 1.15      |

|             |         |                                                                                                    |           |
|-------------|---------|----------------------------------------------------------------------------------------------------|-----------|
| 205518_s_at | CMAH    | cytidine monophosphate-N-acetylneuraminic acid hydroxylase (CMP-N-acetylneuraminate monooxygenase) | 3.06      |
| 205524_s_at | HAPLN1  | hyaluronan and proteoglycan link protein 1                                                         | -<br>1.25 |
| 205525_at   | CALD1   | caldesmon 1                                                                                        | 1.97      |
| 205528_s_at | RUNX1T1 | runt-related transcription factor 1; translocated to, 1 (cyclin D-related)                         | 1.24      |
| 205532_s_at | CDH6    | cadherin 6, type 2, K-cadherin (fetal kidney)                                                      | 1.4       |
| 205542_at   | STEAP1  | six transmembrane epithelial antigen of the prostate 1                                             | -3.8      |
| 205548_s_at | BTG3    | BTG family, member 3                                                                               | 2.2       |

|             |         |                                                                                                                      |           |
|-------------|---------|----------------------------------------------------------------------------------------------------------------------|-----------|
| 205552_s_at | OAS1    | 2',5'-oligoadenylate synthetase<br>1, 40/46kDa                                                                       | 2.48      |
| 205559_s_at | PCSK5   | proprotein convertase<br>subtilisin/kexin type 5                                                                     | 1.29      |
| 205582_s_at | GGTLA1  | gamma-glutamyltransferase-<br>like activity 1                                                                        | 1.76      |
| 205584_at   | CXorf45 | chromosome X open reading<br>frame 45                                                                                | 1.59      |
| 205592_at   | SLC4A1  | solute carrier family 4, anion<br>exchanger, member 1<br>(erythrocyte membrane protein<br>band 3, Diego blood group) | -<br>1.33 |
| 205596_s_at | SMURF2  | SMAD specific E3 ubiquitin<br>protein ligase 2                                                                       | 2.62      |

|             |         |                                                                               |           |
|-------------|---------|-------------------------------------------------------------------------------|-----------|
| 205600_x_at | HOXB5   | homeobox B5                                                                   | -<br>1.51 |
| 205613_at   | SYT17   | synaptotagmin XVII                                                            | -<br>1.71 |
| 205634_x_at | LENG4   | leukocyte receptor cluster<br>(LRC) member 4                                  | -<br>1.36 |
| 205637_s_at | SH3GL3  | SH3-domain GRB2-like 3                                                        | -<br>1.43 |
| 205638_at   | BAI3    | brain-specific angiogenesis<br>inhibitor 3                                    | 1.34      |
| 205640_at   | ALDH3B1 | aldehyde dehydrogenase 3<br>family, member B1                                 | 1.35      |
| 205642_at   | CEP110  | centrosomal protein 110kDa                                                    | 1.27      |
| 205643_s_at | PPP2R2B | protein phosphatase 2 (formerly<br>2A), regulatory subunit B, beta<br>isoform | -<br>1.27 |



|             |         |                                                              |           |
|-------------|---------|--------------------------------------------------------------|-----------|
| 205645_at   | REPS2   | RALBP1 associated Eps domain containing 2                    | -<br>1.29 |
| 205649_s_at | FGA     | fibrinogen alpha chain                                       | -1.5      |
| 205654_at   | C4BPA   | complement component 4 binding protein, alpha                | -<br>1.66 |
| 205660_at   | OASL    | 2'-5'-oligoadenylate synthetase-like                         | 3.18      |
| 205663_at   | PCBP3   | poly(rC) binding protein 3                                   | -<br>1.46 |
| 205668_at   | LY75    | lymphocyte antigen 75                                        | 2.55      |
| 205684_s_at | DENND4C | DENN/MADD domain containing 4C                               | 1.66      |
| 205723_at   | CNTFR   | ciliary neurotrophic factor receptor                         | -<br>1.43 |
| 205724_at   | PKP1    | plakophilin 1 (ectodermal dysplasia/skin fragility syndrome) | -<br>1.28 |

|             |         |                                                                    |      |
|-------------|---------|--------------------------------------------------------------------|------|
|             |         |                                                                    | -    |
| 205754_at   | F2      | coagulation factor II (thrombin)                                   | 1.67 |
| 205758_at   | CD8A    | CD8a molecule                                                      | 2.71 |
|             |         |                                                                    | -    |
| 205783_at   | KLK13   | kallikrein-related peptidase 13                                    | 1.41 |
|             |         |                                                                    | -    |
| 205785_at   | ITGAM   | integrin, alpha M (complement component 3 receptor 3 subunit)      | 1.24 |
|             |         |                                                                    | -    |
| 205788_s_at | ZC3H11A | zinc finger CCCH-type containing 11A                               | 1.46 |
|             |         |                                                                    | -    |
| 205802_at   | TRPC1   | transient receptor potential cation channel, subfamily C, member 1 | 1.42 |
|             |         |                                                                    | -    |
| 205803_s_at | TRPC1   | transient receptor potential cation channel, subfamily C, member 1 | 1.44 |
|             |         |                                                                    | -    |
| 205823_at   | RGS12   | regulator of G-protein signaling 12                                | 1.65 |

|             |         |                                                              |           |
|-------------|---------|--------------------------------------------------------------|-----------|
| 205834_s_at | PART1   | prostate androgen-regulated transcript 1                     | -<br>1.29 |
| 205840_x_at | GH1     | growth hormone 1                                             | -<br>1.23 |
| 205843_x_at | CRAT    | carnitine acetyltransferase                                  | -1.7      |
| 205845_at   | CACNA1H | calcium channel, voltage-dependent, T type, alpha 1H subunit | -<br>1.38 |
| 205849_s_at | UQCRB   | ubiquinol-cytochrome c reductase binding protein             | 1.46      |
| 205870_at   | BDKRB2  | bradykinin receptor B2                                       | 1.88      |
| 205871_at   | PLGLB2  | plasminogen-like B2                                          | -<br>1.67 |
| 205878_at   | POU6F1  | POU class 6 homeobox 1                                       | 1.43      |
| 205879_x_at | RET     | ret proto-oncogene                                           | -<br>1.56 |

|             |        |                                                                                         |           |
|-------------|--------|-----------------------------------------------------------------------------------------|-----------|
| 205907_s_at | OMD    | osteomodulin                                                                            | 1.7       |
| 205929_at   | GPA33  | glycoprotein A33<br>(transmembrane)                                                     | -<br>1.31 |
| 205935_at   | FOXF1  | forkhead box F1                                                                         | 1.36      |
| 205960_at   | PDK4   | pyruvate dehydrogenase kinase,<br>isozyme 4                                             | 4.87      |
| 205965_at   | BATF   | basic leucine zipper<br>transcription factor, ATF-like                                  | 1.61      |
| 205970_at   | MT3    | metallothionein 3                                                                       | -<br>1.55 |
| 205975_s_at | HOXD1  | homeobox D1                                                                             | -<br>1.24 |
| 205992_s_at | IL15   | interleukin 15                                                                          | 1.57      |
| 205997_at   | ADAM28 | ADAM metallopeptidase<br>domain 28                                                      | 1.55      |
| 206009_at   | ITGA9  | integrin, alpha 9                                                                       | 1.42      |
| 206011_at   | CASP1  | caspase 1, apoptosis-related<br>cysteine peptidase (interleukin<br>1, beta, convertase) | 2.24      |

|             |        |                                                                     |           |
|-------------|--------|---------------------------------------------------------------------|-----------|
| 206012_at   | LEFTY2 | left-right determination factor 2                                   | -<br>1.25 |
| 206028_s_at | MERTK  | c-mer proto-oncogene tyrosine<br>kinase                             | 2.42      |
| 206042_x_at | SNURF  | SNRPN upstream reading<br>frame                                     | 2.55      |
| 206060_s_at | PTPN22 | protein tyrosine phosphatase,<br>non-receptor type 22<br>(lymphoid) | 1.36      |
| 206066_s_at | RAD51C | RAD51 homolog C (S.<br>cerevisiae)                                  | 1.35      |
| 206071_s_at | EPHA3  | EPH receptor A3                                                     | 1.63      |
| 206100_at   | CPM    | carboxypeptidase M                                                  | 2.26      |
| 206123_at   | LLGL1  | lethal giant larvae homolog 1<br>(Drosophila)                       | -<br>2.26 |
| 206132_at   | MCC    | mutated in colorectal cancers                                       | -1.7      |
| 206178_at   | PLA2G5 | phospholipase A2, group V                                           | 1.54      |

|             |        |                                                                                                    |           |
|-------------|--------|----------------------------------------------------------------------------------------------------|-----------|
| 206195_x_at | GH2    | growth hormone 2                                                                                   | -1.3      |
| 206197_at   | NME5   | non-metastatic cells 5, protein<br>expressed in (nucleoside-<br>diphosphate kinase)                | 1.37      |
| 206200_s_at | ANXA11 | annexin A11                                                                                        | 1.92      |
| 206212_at   | CPA2   | carboxypeptidase A2<br>(pancreatic)                                                                | -1.3      |
| 206214_at   | PLA2G7 | phospholipase A2, group VII<br>(platelet-activating factor<br>acetylhydrolase, plasma)             | 2.33      |
| 206231_at   | KCNN1  | potassium intermediate/small<br>conductance calcium-activated<br>channel, subfamily N, member<br>1 | -<br>1.31 |

|             |         |                                                                  |           |
|-------------|---------|------------------------------------------------------------------|-----------|
| 206232_s_at | B4GALT6 | UDP-Gal:betaGlcNAc beta 1,4-galactosyltransferase, polypeptide 6 | -<br>1.11 |
| 206250_x_at | AVPR1A  | arginine vasopressin receptor 1A                                 | -<br>1.68 |
| 206252_s_at | AVPR1A  | arginine vasopressin receptor 1A                                 | -<br>1.56 |
| 206291_at   | NTS     | neurotensin                                                      | 2.01      |
| 206295_at   | IL18    | interleukin 18 (interferon-gamma-inducing factor)                | 2.43      |
| 206317_s_at | ABCB8   | ATP-binding cassette, sub-family B (MDR/TAP), member 8           | -<br>1.29 |
| 206350_at   | APCS    | amyloid P component, serum                                       | -<br>1.69 |
| 206354_at   | SLCO1B3 | solute carrier organic anion transporter family, member 1B3      | -<br>3.06 |

|             |         |                                                                                     |           |
|-------------|---------|-------------------------------------------------------------------------------------|-----------|
| 206366_x_at | XCL1    | chemokine (C motif) ligand 1                                                        | 1.93      |
| 206370_at   | PIK3CG  | phosphoinositide-3-kinase,<br>catalytic, gamma polypeptide                          | 1.15      |
| 206392_s_at | RARRES1 | retinoic acid receptor responder<br>(tazarotene induced) 1                          | 2.18      |
| 206395_at   | DGKG    | diacylglycerol kinase, gamma<br>90kDa                                               | -<br>1.14 |
| 206413_s_at | TCL1B   | T-cell leukemia/lymphoma 1B                                                         | -<br>1.29 |
| 206430_at   | CDX1    | caudal type homeobox 1                                                              | -<br>1.39 |
| 206454_s_at | RHO     | rhodopsin (opsin 2, rod<br>pigment) (retinitis pigmentosa<br>4, autosomal dominant) | -1.3      |
| 206461_x_at | MT1H    | metallothionein 1H                                                                  | -<br>1.78 |



|             |         |                                                                     |           |
|-------------|---------|---------------------------------------------------------------------|-----------|
| 206498_at   | OCA2    | oculocutaneous albinism II<br>(pink-eye dilution homolog,<br>mouse) | -<br>1.31 |
| 206509_at   | PIP     | prolactin-induced protein                                           | -1.4      |
| 206520_x_at | SIGLEC6 | sialic acid binding Ig-like lectin<br>6                             | -<br>1.33 |
| 206524_at   | T       | T, brachyury homolog (mouse)                                        | -<br>1.32 |
| 206561_s_at | AKR1B10 | aldo-keto reductase family 1,<br>member B10 (aldose reductase)      | 8.09      |
| 206567_s_at | PHF20   | PHD finger protein 20                                               | 1.32      |
| 206584_at   | LY96    | lymphocyte antigen 96                                               | 2.94      |
| 206586_at   | CNR2    | cannabinoid receptor 2<br>(macrophage)                              | -<br>1.51 |
| 206594_at   | PASK    | PAS domain containing<br>serine/threonine kinase                    | -1.3      |

|           |          |                                                                              |      |
|-----------|----------|------------------------------------------------------------------------------|------|
| 206599_at | SLC16A5  | solute carrier family 16,<br>member 5 (monocarboxylic<br>acid transporter 6) | -1.2 |
| 206614_at | GDF5     | growth differentiation factor 5                                              | 1.35 |
| 206625_at | PRPH2    | peripherin 2 (retinal<br>degeneration, slow)                                 | -1.2 |
| 206629_at | ADAMTSL2 | ADAMTS-like 2                                                                | 1.87 |
| 206630_at | TYR      | tyrosinase (oculocutaneous<br>albinism IA)                                   | 1.28 |
| 206631_at | PTGER2   | prostaglandin E receptor 2<br>(subtype EP2), 53kDa                           | 1.55 |
| 206637_at | P2RY14   | purinergic receptor P2Y, G-<br>protein coupled, 14                           | 1.4  |
| 206638_at | HTR2B    | 5-hydroxytryptamine<br>(serotonin) receptor 2B                               | 2.18 |

|             |          |                                                               |           |
|-------------|----------|---------------------------------------------------------------|-----------|
| 206668_s_at | SCAMP1   | secretory carrier membrane<br>protein 1                       | 1.63      |
| 206690_at   | ACCN1    | amiloride-sensitive cation<br>channel 1, neuronal (degenerin) | -<br>1.24 |
| 206694_at   | PNLIPRP1 | pancreatic lipase-related protein<br>1                        | -<br>1.29 |
| 206697_s_at | HP       | haptoglobin                                                   | -1.6      |
| 206701_x_at | EDNRB    | endothelin receptor type B                                    | 2.68      |
| 206703_at   | CHRNA1   | cholinergic receptor, nicotinic,<br>beta 1 (muscle)           | -<br>1.22 |
| 206707_x_at | C6orf32  | chromosome 6 open reading<br>frame 32                         | 1.24      |
| 206719_at   | SYNGR4   | synaptogyrin 4                                                | -<br>1.21 |

|             |       |                                                                                                         |           |
|-------------|-------|---------------------------------------------------------------------------------------------------------|-----------|
| 206723_s_at | EDG4  | endothelial differentiation,<br>lysophosphatidic acid G-<br>protein-coupled receptor, 4                 | 1.31      |
| 206727_at   | C9    | complement component 9                                                                                  | -<br>1.87 |
| 206743_s_at | ASGR1 | asialoglycoprotein receptor 1                                                                           | -<br>2.01 |
| 206780_at   | GAD2  | glutamate decarboxylase 2<br>(pancreatic islets and brain,<br>65kDa)                                    | -<br>1.29 |
| 206783_at   | FGF4  | fibroblast growth factor 4<br>(heparin secretory transforming<br>protein 1, Kaposi sarcoma<br>oncogene) | -1.3      |
| 206798_x_at | DLEC1 | deleted in lung and esophageal<br>cancer 1                                                              | -<br>1.41 |
| 206804_at   | CD3G  | CD3g molecule, gamma (CD3-<br>TCR complex)                                                              | 1.39      |
| 206807_s_at | ADD2  | adducin 2 (beta)                                                                                        | -1.5      |

|             |        |                                                                                                                    |           |
|-------------|--------|--------------------------------------------------------------------------------------------------------------------|-----------|
| 206821_x_at | HRBL   | HIV-1 Rev binding protein-like                                                                                     | -<br>1.37 |
| 206849_at   | GABRG2 | gamma-aminobutyric acid<br>(GABA) A receptor, gamma 2                                                              | -1.2      |
| 206896_s_at | GNG7   | guanine nucleotide binding<br>protein (G protein), gamma 7                                                         | 1.39      |
| 206898_at   | CDH19  | cadherin 19, type 2                                                                                                | 4.91      |
| 206932_at   | CH25H  | cholesterol 25-hydroxylase                                                                                         | 2.78      |
| 206973_at   | PPFIA2 | protein tyrosine phosphatase,<br>receptor type, f polypeptide<br>(PTPRF), interacting protein<br>(liprin), alpha 2 | -<br>1.31 |
| 206993_at   | ATP5S  | ATP synthase, H <sup>+</sup> transporting,<br>mitochondrial F0 complex,<br>subunit s (factor B)                    | -<br>1.24 |

|             |         |                                                                                                       |           |
|-------------|---------|-------------------------------------------------------------------------------------------------------|-----------|
| 207001_x_at | TSC22D3 | TSC22 domain family, member<br>3                                                                      | 2.54      |
| 207002_s_at | PLAGL1  | pleiomorphic adenoma gene-<br>like 1                                                                  | 2.16      |
| 207024_at   | CHRND   | cholinergic receptor, nicotinic,<br>delta                                                             | -<br>1.28 |
| 207028_at   | MYCNOS  | v-myc myelocytomatosis viral<br>related oncogene,<br>neuroblastoma derived (avian)<br>opposite strand | -<br>1.19 |
| 207033_at   | GIF     | gastric intrinsic factor (vitamin<br>B synthesis)                                                     | -<br>1.18 |
| 207035_at   | SLC30A3 | solute carrier family 30 (zinc<br>transporter), member 3                                              | -<br>1.35 |

|             |        |                                                                                                             |           |
|-------------|--------|-------------------------------------------------------------------------------------------------------------|-----------|
| 207044_at   | THRB   | thyroid hormone receptor, beta<br>(erythroblastic leukemia viral<br>(v-erb-a) oncogene homolog 2,<br>avian) | -1.3      |
| 207065_at   | KRT75  | keratin 75                                                                                                  | -<br>1.38 |
| 207079_s_at | MED6   | mediator complex subunit 6                                                                                  | 1.81      |
| 207085_x_at | CSF2RA | colony stimulating factor 2<br>receptor, alpha, low-affinity<br>(granulocyte-macrophage)                    | 1.32      |
| 207132_x_at | PFDN5  | prefoldin subunit 5                                                                                         | 1.96      |
| 207138_at   | PHF2   | PHD finger protein 2                                                                                        | -<br>1.33 |
| 207168_s_at | H2AFY  | H2A histone family, member Y                                                                                | 1.53      |

|             |         |                                                                  |           |
|-------------|---------|------------------------------------------------------------------|-----------|
| 207169_x_at | DDR1    | discoidin domain receptor<br>family, member 1                    | 1.59      |
| 207170_s_at | LETMD1  | LETM1 domain containing 1                                        | 1.52      |
| 207173_x_at | CDH11   | cadherin 11, type 2, OB-<br>cadherin (osteoblast)                | 2.9       |
| 207187_at   | JAK3    | Janus kinase 3 (a protein<br>tyrosine kinase, leukocyte)         | -<br>1.42 |
| 207191_s_at | ISLR    | immunoglobulin superfamily<br>containing leucine-rich repeat     | 1.5       |
| 207205_at   | CEACAM4 | carcinoembryonic antigen-<br>related cell adhesion molecule<br>4 | -<br>1.13 |
| 207214_at   | SPINK4  | serine peptidase inhibitor,<br>Kazal type 4                      | -<br>1.26 |



|             |         |                                                                                          |           |
|-------------|---------|------------------------------------------------------------------------------------------|-----------|
| 207218_at   | F9      | coagulation factor IX (plasma thromboplastic component, Christmas disease, hemophilia B) | -<br>1.55 |
| 207221_at   | F2RL3   | coagulation factor II (thrombin) receptor-like 3                                         | -<br>1.17 |
| 207222_at   | PLA2G10 | phospholipase A2, group X                                                                | -<br>1.26 |
| 207238_s_at | PTPRC   | protein tyrosine phosphatase, receptor type, C                                           | 4.88      |
| 207255_at   | LEPR    | leptin receptor                                                                          | 3.07      |
| 207262_at   | APOF    | apolipoprotein F                                                                         | -<br>2.59 |
| 207266_x_at | RBMS1   | RNA binding motif, single stranded interacting protein 1                                 | 3.15      |
| 207295_at   | SCNN1G  | sodium channel, nonvoltage-gated 1, gamma                                                | -<br>1.14 |

|             |        |                                                                                    |           |
|-------------|--------|------------------------------------------------------------------------------------|-----------|
| 207317_s_at | CASQ2  | calsequestrin 2 (cardiac muscle)                                                   | -<br>1.51 |
| 207330_at   | PZP    | pregnancy-zone protein                                                             | -<br>3.63 |
| 207360_s_at | NTSR1  | neurotensin receptor 1 (high affinity)                                             | -<br>1.27 |
| 207367_at   | ATP12A | ATPase, H <sup>+</sup> /K <sup>+</sup> transporting, nongastric, alpha polypeptide | -<br>1.35 |
| 207389_at   | GP1BA  | glycoprotein Ib (platelet), alpha polypeptide                                      | -<br>1.44 |
| 207423_s_at | ADAM20 | ADAM metallopeptidase domain 20                                                    | -<br>1.27 |
| 207443_at   | NR2E1  | nuclear receptor subfamily 2, group E, member 1                                    | -<br>1.18 |
| 207459_x_at | GYPB   | glycophorin B (MNS blood group)                                                    | -<br>1.32 |
| 207473_at   | MLN    | motilin                                                                            | -<br>1.32 |

|             |         |                                                  |           |
|-------------|---------|--------------------------------------------------|-----------|
| 207485_x_at | BTN3A1  | butyrophilin, subfamily 3,<br>member A1          | 1.39      |
| 207513_s_at | ZNF189  | zinc finger protein 189                          | 1.72      |
| 207524_at   | ST7     | suppression of tumorigenicity 7                  | -<br>1.56 |
| 207538_at   | IL4     | interleukin 4                                    | -<br>1.32 |
| 207541_s_at | EXOSC10 | exosome component 10                             | 1.61      |
| 207547_s_at | FAM107A | family with sequence similarity<br>107, member A | 1.57      |
| 207562_at   | DGKQ    | diacylglycerol kinase, theta<br>110kDa           | -<br>1.26 |
| 207571_x_at | C1orf38 | chromosome 1 open reading<br>frame 38            | 1.87      |
| 207584_at   | LPA     | lipoprotein, Lp(a)                               | -4.5      |
| 207589_at   | ADRA1B  | adrenergic, alpha-1B-, receptor                  | -<br>1.41 |
| 207595_s_at | BMP1    | bone morphogenetic protein 1                     | -<br>1.31 |

|             |           |                                                     |           |
|-------------|-----------|-----------------------------------------------------|-----------|
| 207602_at   | TMPRSS11D | transmembrane protease, serine<br>11D               | -<br>1.45 |
| 207630_s_at | CREM      | cAMP responsive element<br>modulator                | 2.52      |
| 207644_at   | FOXH1     | forkhead box H1                                     | -<br>1.45 |
| 207646_s_at | CDY1      | chromodomain protein, Y-<br>linked, 1               | -1.3      |
| 207648_at   | DRP2      | dystrophin related protein 2                        | -<br>1.47 |
| 207670_at   | KRT85     | keratin 85                                          | -<br>1.35 |
| 207691_x_at | ENTPD1    | ectonucleoside triphosphate<br>diphosphohydrolase 1 | 1.62      |
| 207700_s_at | NCOA3     | nuclear receptor coactivator 3                      | 1.96      |
| 207708_at   | ALOXE3    | arachidonate lipoxygenase 3                         | -<br>1.48 |
| 207717_s_at | PKP2      | plakophilin 2                                       | -<br>1.93 |
| 207720_at   | LOR       | loricrin                                            | -         |

|             |        |                                                                        |           |
|-------------|--------|------------------------------------------------------------------------|-----------|
|             |        |                                                                        | 1.18      |
| 207732_s_at | DLG3   | discs, large homolog 3<br>(neuroendocrine-dlg,<br>Drosophila)          | 1.15      |
| 207733_x_at | PSG9   | pregnancy specific beta-1-<br>glycoprotein 9                           | -<br>1.31 |
| 207746_at   | POLQ   | polymerase (DNA directed),<br>theta                                    | -<br>1.16 |
| 207748_at   |        | NA                                                                     | -<br>1.39 |
| 207753_at   | ZNF304 | zinc finger protein 304                                                | 1.43      |
| 207771_at   | SLC5A2 | solute carrier family 5<br>(sodium/glucose cotransporter),<br>member 2 | -<br>1.22 |
| 207780_at   | CYLC2  | cyclin, basic protein of sperm<br>head cytoskeleton 2                  | -1.1      |
| 207808_s_at | PROS1  | protein S (alpha)                                                      | -<br>1.58 |

|             |         |                                                                               |           |
|-------------|---------|-------------------------------------------------------------------------------|-----------|
| 207826_s_at | ID3     | inhibitor of DNA binding 3,<br>dominant negative helix-loop-<br>helix protein | 2.33      |
| 207829_s_at | BNIP1   | BCL2/adenovirus E1B 19kDa<br>interacting protein 1                            | 1.43      |
| 207834_at   | FBLN1   | fibulin 1                                                                     | -<br>1.44 |
| 207842_s_at | CASC3   | cancer susceptibility candidate<br>3                                          | 1.42      |
| 207859_s_at | CHRNA3  | cholinergic receptor, nicotinic,<br>beta 3                                    | -<br>1.18 |
| 207869_s_at | CACNA1G | calcium channel, voltage-<br>dependent, T type, alpha 1G<br>subunit           | 1.08      |
| 207878_at   | KRT76   | keratin 76                                                                    | -<br>1.29 |
| 207884_at   | GUCY2D  | guanylate cyclase 2D,<br>membrane (retina-specific)                           | -1.2      |
| 207911_s_at | TGM5    | transglutaminase 5                                                            | -         |

|             |        |                               |      |
|-------------|--------|-------------------------------|------|
|             |        |                               | 1.44 |
|             |        |                               | -    |
| 207919_at   | ART1   | ADP-ribosyltransferase 1      | 1.59 |
|             |        |                               | -    |
| 207925_at   | CST5   | cystatin D                    | 1.24 |
|             |        | gastrin-releasing peptide     | -    |
| 207929_at   | GRPR   | receptor                      | 1.35 |
|             |        | zona pellucida glycoprotein 2 | -    |
| 207933_at   | ZP2    | (sperm receptor)              | 1.23 |
|             |        |                               |      |
| 207941_s_at | RBM39  | RNA binding motif protein 39  | 1.53 |
|             |        |                               |      |
| 207945_s_at | CSNK1D | casein kinase 1, delta        | 1.73 |
|             |        | ankyrin 3, node of Ranvier    |      |
| 207950_s_at | ANK3   | (ankyrin G)                   | 1.41 |
|             |        |                               |      |
| 207957_s_at | PRKCB1 | protein kinase C, beta 1      | 1.52 |
|             |        |                               | -    |
| 207964_x_at | IFNA4  | interferon, alpha 4           | 1.17 |
|             |        |                               |      |
| 207971_s_at | CEP68  | centrosomal protein 68kDa     | 1.25 |

|             |        |                                                                 |      |
|-------------|--------|-----------------------------------------------------------------|------|
| 207978_s_at | NR4A3  | nuclear receptor subfamily 4,<br>group A, member 3              | 1.85 |
| 207991_x_at | ACRV1  | acrosomal vesicle protein 1                                     | 1.15 |
| 207992_s_at | AMPD3  | adenosine monophosphate<br>deaminase (isoform E)                | 1.44 |
| 207999_s_at | ADARB1 | adenosine deaminase, RNA-<br>specific, B1 (RED1 homolog<br>rat) | 1.33 |
| 208007_at   |        | NA                                                              | 1.34 |
| 208012_x_at | SP110  | SP110 nuclear body protein                                      | 1.66 |
| 208013_s_at | ACRV1  | acrosomal vesicle protein 1                                     | 1.16 |
| 208030_s_at | ADD1   | adducin 1 (alpha)                                               | 1.8  |



|             |        |                                                                                                                                  |           |
|-------------|--------|----------------------------------------------------------------------------------------------------------------------------------|-----------|
| 208031_s_at | RFX2   | regulatory factor X, 2<br>(influences HLA class II<br>expression)                                                                | -<br>1.44 |
| 208035_at   | GRM6   | glutamate receptor,<br>metabotropic 6                                                                                            | -<br>1.26 |
| 208040_s_at | MYBPC3 | myosin binding protein C,<br>cardiac                                                                                             | -<br>1.42 |
| 208050_s_at | CASP2  | caspase 2, apoptosis-related<br>cysteine peptidase (neural<br>precursor cell expressed,<br>developmentally down-<br>regulated 2) | -<br>1.22 |
| 208106_x_at | PSG6   | pregnancy specific beta-1-<br>glycoprotein 6                                                                                     | -<br>1.47 |
| 208108_s_at | AVPR2  | arginine vasopressin receptor 2<br>(nephrogenic diabetes<br>insipidus)                                                           | -<br>1.26 |

|             |         |                                                                                       |           |
|-------------|---------|---------------------------------------------------------------------------------------|-----------|
| 208131_s_at | PTGIS   | prostaglandin I2 (prostacyclin)<br>synthase                                           | 3.38      |
| 208146_s_at | CPVL    | carboxypeptidase, vitellogenic-<br>like                                               | 3.16      |
| 208148_at   | MYH4    | myosin, heavy chain 4, skeletal<br>muscle                                             | 4.02      |
| 208158_s_at | OSBPL1A | oxysterol binding protein-like<br>1A                                                  | 1.68      |
| 208179_x_at | KIR2DL3 | killer cell immunoglobulin-like<br>receptor, two domains, long<br>cytoplasmic tail, 3 | -<br>1.29 |
| 208182_x_at | IFNA14  | interferon, alpha 14                                                                  | -1.2      |
| 208187_s_at |         | NA                                                                                    | -<br>1.19 |

|             |        |                                                    |           |
|-------------|--------|----------------------------------------------------|-----------|
| 208188_at   | KRT9   | keratin 9 (epidermolytic palmoplantar keratoderma) | -<br>1.42 |
| 208190_s_at | LSR    | lipolysis stimulated lipoprotein receptor          | -1.5      |
| 208204_s_at | CAV3   | caveolin 3                                         | -<br>1.31 |
| 208211_s_at | ALK    | anaplastic lymphoma kinase (Ki-1)                  | -<br>1.14 |
| 208224_at   | HOXB1  | homeobox B1                                        | -<br>1.54 |
| 208226_x_at | ADAM22 | ADAM metallopeptidase domain 22                    | -<br>1.21 |
| 208227_x_at | ADAM22 | ADAM metallopeptidase domain 22                    | -<br>1.29 |
| 208237_x_at | ADAM22 | ADAM metallopeptidase domain 22                    | -<br>1.26 |
| 208259_x_at | IFNA7  | interferon, alpha 7                                | -<br>1.16 |
| 208279_s_at | CDRT1  | CMT1A duplicated region transcript 1               | -<br>1.39 |

|             |         |                                                                  |           |
|-------------|---------|------------------------------------------------------------------|-----------|
|             |         |                                                                  |           |
| 208285_at   | OR7A5   | olfactory receptor, family 7,<br>subfamily A, member 5           | -<br>1.45 |
| 208292_at   | BMP10   | bone morphogenetic protein 10                                    | -1.2      |
| 208296_x_at | TNFAIP8 | tumor necrosis factor, alpha-<br>induced protein 8               | 3.08      |
| 208318_s_at | XYLB    | xylulokinase homolog (H.<br>influenzae)                          | -<br>1.41 |
| 208323_s_at | ANXA13  | annexin A13                                                      | 2.49      |
| 208325_s_at | AKAP13  | A kinase (PRKA) anchor<br>protein 13                             | 1.68      |
| 208334_at   | NDST4   | N-deacetylase/N-<br>sulfotransferase (heparan<br>glucosaminyl) 4 | -<br>1.17 |
| 208384_s_at | MID2    | midline 2                                                        | -<br>1.39 |
| 208391_s_at | GLP1R   | glucagon-like peptide 1                                          | -         |

|             |        |                                                   |           |
|-------------|--------|---------------------------------------------------|-----------|
|             |        | receptor                                          | 1.15      |
| 208396_s_at | PDE1A  | phosphodiesterase 1A,<br>calmodulin-dependent     | 2.04      |
| 208407_s_at | CTNND1 | catenin (cadherin-associated<br>protein), delta 1 | 1.72      |
| 208431_s_at | TUB    | tubby homolog (mouse)                             | -<br>1.22 |
| 208450_at   | LGALS2 | lectin, galactoside-binding,<br>soluble, 2        | 2.18      |
| 208460_at   | GJA7   | gap junction protein, alpha 7,<br>45kDa           | -<br>1.34 |
| 208471_at   | HPR    | haptoglobin-related protein                       | -<br>3.01 |

|             |          |                                                                                                     |           |
|-------------|----------|-----------------------------------------------------------------------------------------------------|-----------|
| 208479_at   | KCNA1    | potassium voltage-gated channel, shaker-related subfamily, member 1 (episodic ataxia with myokymia) | -<br>1.24 |
| 208486_at   | DRD5     | dopamine receptor D5                                                                                | -<br>1.35 |
| 208520_at   | OR10H3   | olfactory receptor, family 10, subfamily H, member 3                                                | -<br>1.27 |
| 208524_at   | GPR15    | G protein-coupled receptor 15                                                                       | -<br>1.32 |
| 208531_at   | SERPINA2 | serpin peptidase inhibitor, clade A (alpha-1 antiproteinase, antitrypsin), member 2                 | -<br>1.37 |
| 208532_x_at | KRTAP5-8 | keratin associated protein 5-8                                                                      | -<br>1.55 |

|             |           |                                                                       |      |
|-------------|-----------|-----------------------------------------------------------------------|------|
| 208540_x_at | LOC729659 | similar to Putative S100<br>calcium-binding protein A11<br>pseudogene | 1.78 |
| 208553_at   | HIST1H1E  | histone cluster 1, H1e                                                | 1.14 |
| 208565_at   | MC5R      | melanocortin 5 receptor                                               | 1.33 |
| 208578_at   | SCN10A    | sodium channel, voltage-gated,<br>type X, alpha subunit               | 1.35 |
| 208588_at   | FKSG2     | apoptosis inhibitor                                                   | -1.2 |
| 208597_at   | CNTF      | ciliary neurotrophic factor                                           | 1.32 |
| 208609_s_at | TNXB      | tenascin XB                                                           | 1.44 |
| 208621_s_at | VIL2      | villin 2 (ezrin)                                                      | 2.29 |
| 208622_s_at | VIL2      | villin 2 (ezrin)                                                      | 2.25 |
| 208634_s_at | MACF1     | microtubule-actin crosslinking<br>factor 1                            | 1.68 |

|             |       |                                                                                               |      |
|-------------|-------|-----------------------------------------------------------------------------------------------|------|
| 208640_at   | RAC1  | ras-related C3 botulinum toxin<br>substrate 1 (rho family, small<br>GTP binding protein Rac1) | 1.34 |
| 208641_s_at | RAC1  | ras-related C3 botulinum toxin<br>substrate 1 (rho family, small<br>GTP binding protein Rac1) | 1.59 |
| 208646_at   | RPS14 | ribosomal protein S14                                                                         | 1.41 |
| 208651_x_at | CD24  | CD24 molecule                                                                                 | 3.74 |
| 208668_x_at | HMGN2 | high-mobility group<br>nucleosomal binding domain 2                                           | 1.79 |



|             |          |                                                                           |      |
|-------------|----------|---------------------------------------------------------------------------|------|
| 208678_at   | ATP6V1E1 | ATPase, H <sup>+</sup> transporting,<br>lysosomal 31kDa, V1 subunit<br>E1 | 1.55 |
| 208679_s_at | ARPC2    | actin related protein 2/3<br>complex, subunit 2, 34kDa                    | 1.73 |
| 208682_s_at | MAGED2   | melanoma antigen family D, 2                                              | 1.69 |
| 208686_s_at | BRD2     | bromodomain containing 2                                                  | 1.35 |
| 208690_s_at | PDLIM1   | PDZ and LIM domain 1 (elfin)                                              | 1.69 |
| 208697_s_at | EIF3E    | eukaryotic translation initiation<br>factor 3, subunit E                  | 1.65 |
| 208718_at   | DDX17    | DEAD (Asp-Glu-Ala-Asp) box<br>polypeptide 17                              | 1.83 |

|             |          |                                                                                     |           |
|-------------|----------|-------------------------------------------------------------------------------------|-----------|
| 208725_at   | EIF2S2   | eukaryotic translation initiation factor 2, subunit 2 beta, 38kDa                   | -<br>1.45 |
| 208728_s_at | CDC42    | cell division cycle 42 (GTP binding protein, 25kDa)                                 | 1.47      |
| 208729_x_at | HLA-B    | major histocompatibility complex, class I, B                                        | 2.75      |
| 208735_s_at | CTDSP2   | CTD (carboxy-terminal domain, RNA polymerase II, polypeptide A) small phosphatase 2 | -<br>1.48 |
| 208742_s_at | SAP18    | Sin3A-associated protein, 18kDa                                                     | 1.55      |
| 208769_at   | EIF4EBP2 | eukaryotic translation initiation factor 4E binding protein 2                       | -<br>1.42 |
| 208782_at   | FSTL1    | follistatin-like 1                                                                  | 2.92      |

|             |         |                                                      |      |
|-------------|---------|------------------------------------------------------|------|
| 208798_x_at | GOLGA8A | golgi autoantigen, golgin<br>subfamily a, 8A         | 2.35 |
| 208808_s_at | HMGB2   | high-mobility group box 2                            | 3.07 |
| 208812_x_at | HLA-C   | major histocompatibility<br>complex, class I, C      | 1.87 |
| 208816_x_at | ANXA2P2 | annexin A2 pseudogene 2                              | 1.63 |
| 208825_x_at | RPL23A  | ribosomal protein L23a                               | 1.47 |
| 208834_x_at | RPL23A  | ribosomal protein L23a                               | 1.37 |
| 208854_s_at | STK24   | serine/threonine kinase 24<br>(STE20 homolog, yeast) | 1.77 |
| 208855_s_at | STK24   | serine/threonine kinase 24<br>(STE20 homolog, yeast) | 2.13 |

|             |        |                                                                                       |           |
|-------------|--------|---------------------------------------------------------------------------------------|-----------|
| 208861_s_at | ATRX   | alpha thalassemia/mental retardation syndrome X-linked (RAD54 homolog, S. cerevisiae) | 1.52      |
| 208876_s_at | PAK2   | p21 (CDKN1A)-activated kinase 2                                                       | -<br>1.34 |
| 208877_at   | PAK2   | p21 (CDKN1A)-activated kinase 2                                                       | -<br>1.77 |
| 208915_s_at | GGA2   | golgi associated, gamma adaptin ear containing, ARF binding protein 2                 | -<br>1.38 |
| 208922_s_at | NXF1   | nuclear RNA export factor 1                                                           | 2.11      |
| 208925_at   | CLDND1 | claudin domain containing 1                                                           | 2.06      |
| 208944_at   | TGFBR2 | transforming growth factor, beta receptor II (70/80kDa)                               | 2.03      |

|             |         |                                                                  |      |
|-------------|---------|------------------------------------------------------------------|------|
|             |         |                                                                  |      |
| 208978_at   | CRIP2   | cysteine-rich protein 2                                          | 1.78 |
| 208980_s_at | UBC     | ubiquitin C                                                      | 1.34 |
| 208981_at   | PECAM1  | platelet/endothelial cell<br>adhesion molecule (CD31<br>antigen) | 2.61 |
| 208982_at   | PECAM1  | platelet/endothelial cell<br>adhesion molecule (CD31<br>antigen) | 2.79 |
| 208983_s_at | PECAM1  | platelet/endothelial cell<br>adhesion molecule (CD31<br>antigen) | 3.25 |
| 208998_at   | UCP2    | uncoupling protein 2<br>(mitochondrial, proton carrier)          | 2.52 |
| 208999_at   | 8-Sep   | septin 8                                                         | 1.58 |
| 209006_s_at | C1orf63 | chromosome 1 open reading<br>frame 63                            | 2.9  |
| 209007_s_at | C1orf63 | chromosome 1 open reading<br>frame 63                            | 2.91 |
| 209008_x_at | KRT8    | keratin 8                                                        | 1.55 |

|             |           |                                                      |      |
|-------------|-----------|------------------------------------------------------|------|
| 209020_at   | C20orf111 | chromosome 20 open reading<br>frame 111              | 1.64 |
| 209022_at   | STAG2     | stromal antigen 2                                    | 1.55 |
| 209030_s_at | CADM1     | cell adhesion molecule 1                             | 1.71 |
| 209043_at   | PAPSS1    | 3'-phosphoadenosine 5'-<br>phosphosulfate synthase 1 | 1.62 |
| 209048_s_at | ZMYND8    | zinc finger, MYND-type<br>containing 8               | 1.94 |
| 209066_x_at | UQCRB     | ubiquinol-cytochrome c<br>reductase binding protein  | 1.46 |
| 209070_s_at | RGS5      | regulator of G-protein signaling<br>5                | 2.37 |
| 209071_s_at | RGS5      | regulator of G-protein signaling<br>5                | 2.49 |

|             |         |                                                                                     |           |
|-------------|---------|-------------------------------------------------------------------------------------|-----------|
| 209074_s_at | FAM107A | family with sequence similarity<br>107, member A                                    | 2.12      |
| 209075_s_at | ISCU    | iron-sulfur cluster scaffold<br>homolog (E. coli)                                   | 1.43      |
| 209083_at   | CORO1A  | coronin, actin binding protein,<br>1A                                               | 2.26      |
| 209102_s_at | HBP1    | HMG-box transcription factor 1                                                      | 1.51      |
| 209110_s_at | RGL2    | ral guanine nucleotide<br>dissociation stimulator-like 2                            | 1.68      |
| 209114_at   | TSPAN1  | tetraspanin 1                                                                       | -<br>1.41 |
| 209116_x_at | HBB     | hemoglobin, beta                                                                    | 8.01      |
| 209133_s_at | COMMD4  | COMM domain containing 4                                                            | -<br>1.23 |
| 209139_s_at | PRKRA   | protein kinase, interferon-<br>inducible double stranded RNA<br>dependent activator | 1.46      |
| 209140_x_at | HLA-B   | major histocompatibility                                                            | 2.25      |

|             |          |                                                                       |           |
|-------------|----------|-----------------------------------------------------------------------|-----------|
|             |          | complex, class I, B                                                   |           |
| 209145_s_at | CBFA2T2  | core-binding factor, runt domain, alpha subunit 2; translocated to, 2 | -<br>1.18 |
| 209154_at   | TAX1BP3  | Tax1 (human T-cell leukemia virus type I) binding protein 3           | 2.32      |
| 209156_s_at | COL6A2   | collagen, type VI, alpha 2                                            | 2.93      |
| 209182_s_at | C10orf10 | chromosome 10 open reading frame 10                                   | 3.21      |
| 209184_s_at | IRS2     | insulin receptor substrate 2                                          | 1.66      |
| 209191_at   | TUBB6    | tubulin, beta 6                                                       | 3.14      |
| 209193_at   | PIM1     | pim-1 oncogene                                                        | -<br>1.81 |
| 209199_s_at | MEF2C    | myocyte enhancer factor 2C                                            | 2.45      |
| 209200_at   | MEF2C    | myocyte enhancer factor 2C                                            | 1.87      |
| 209211_at   | KLF5     | Kruppel-like factor 5 (intestinal)                                    | 1.6       |



|             |          |                                                                                                                                        |           |
|-------------|----------|----------------------------------------------------------------------------------------------------------------------------------------|-----------|
| 209212_s_at | KLF5     | Kruppel-like factor 5<br>(intestinal)                                                                                                  | 1.71      |
| 209228_x_at | TUSC3    | tumor suppressor candidate 3                                                                                                           | 1.81      |
| 209240_at   | OGT      | O-linked N-acetylglucosamine<br>(GlcNAc) transferase (UDP-N-<br>acetylglucosamine:polypeptide-<br>N-acetylglucosaminyl<br>transferase) | 1.99      |
| 209260_at   | SFN      | stratifin                                                                                                                              | -<br>1.32 |
| 209263_x_at | TSPAN4   | tetraspanin 4                                                                                                                          | 1.88      |
| 209265_s_at | METTL3   | methyltransferase like 3                                                                                                               | 1.59      |
| 209273_s_at | ISCA1    | iron-sulfur cluster assembly 1<br>homolog ( <i>S. cerevisiae</i> )                                                                     | 1.48      |
| 209288_s_at | CDC42EP3 | CDC42 effector protein (Rho<br>GTPase binding) 3                                                                                       | 3.13      |

|             |        |                                                                               |      |
|-------------|--------|-------------------------------------------------------------------------------|------|
| 209292_at   | ID4    | inhibitor of DNA binding 4,<br>dominant negative helix-loop-<br>helix protein | 4    |
| 209306_s_at | SWAP70 | SWAP-70 protein                                                               | 2.82 |
| 209307_at   | SWAP70 | SWAP-70 protein                                                               | 1.91 |
| 209318_x_at | PLAGL1 | pleiomorphic adenoma gene-<br>like 1                                          | 2.1  |
| 209320_at   | ADCY3  | adenylate cyclase 3                                                           | 1.23 |
| 209321_s_at | ADCY3  | adenylate cyclase 3                                                           | 1.23 |
| 209344_at   | TPM4   | tropomyosin 4                                                                 | 2.43 |
| 209356_x_at | EFEMP2 | EGF-containing fibulin-like<br>extracellular matrix protein 2                 | 2.2  |
| 209361_s_at | PCBP4  | poly(rC) binding protein 4                                                    | 1.36 |
| 209365_s_at | ECM1   | extracellular matrix protein 1                                                | 1.7  |
| 209369_at   | ANXA3  | annexin A3                                                                    | 5.32 |
| 209374_s_at | IGHM   | immunoglobulin heavy<br>constant mu                                           | 7.68 |
| 209386_at   | TM4SF1 | transmembrane 4 L six family<br>member 1                                      | 2.91 |

|             |        |                                                                                       |           |
|-------------|--------|---------------------------------------------------------------------------------------|-----------|
| 209387_s_at | TM4SF1 | transmembrane 4 L six family member 1                                                 | 2.99      |
| 209389_x_at | DBI    | diazepam binding inhibitor (GABA receptor modulator, acyl-Coenzyme A binding protein) | -<br>1.66 |
| 209415_at   | FZR1   | fizzy/cell division cycle 20 related 1 (Drosophila)                                   | -1.4      |
| 209417_s_at | IFI35  | interferon-induced protein 35                                                         | 1.87      |
| 209422_at   | PHF20  | PHD finger protein 20                                                                 | 2.03      |
| 209428_s_at | ZFPL1  | zinc finger protein-like 1                                                            | -<br>1.52 |
| 209436_at   | SPON1  | spondin 1, extracellular matrix protein                                               | 2.15      |
| 209458_x_at | HBA1   | hemoglobin, alpha 1                                                                   | 6.16      |
| 209459_s_at | ABAT   | 4-aminobutyrate aminotransferase                                                      | -<br>1.86 |

|             |        |                                                                                          |           |
|-------------|--------|------------------------------------------------------------------------------------------|-----------|
| 209460_at   | ABAT   | 4-aminobutyrate<br>aminotransferase                                                      | -<br>2.03 |
| 209465_x_at | PTN    | pleiotrophin (heparin binding<br>growth factor 8, neurite growth-<br>promoting factor 1) | 2.06      |
| 209466_x_at | PTN    | pleiotrophin (heparin binding<br>growth factor 8, neurite growth-<br>promoting factor 1) | 1.38      |
| 209469_at   | GPM6A  | glycoprotein M6A                                                                         | 3.75      |
| 209470_s_at | GPM6A  | glycoprotein M6A                                                                         | 2.87      |
| 209473_at   |        | NA                                                                                       | 1.44      |
| 209474_s_at | ENTPD1 | ectonucleoside triphosphate<br>diphosphohydrolase 1                                      | 1.83      |
| 209481_at   | SNRK   | SNF related kinase                                                                       | 2.04      |

|             |         |                                                                           |      |
|-------------|---------|---------------------------------------------------------------------------|------|
| 209504_s_at | PLEKHB1 | pleckstrin homology domain<br>containing, family B (evectins)<br>member 1 | 1.44 |
| 209505_at   | NR2F1   | nuclear receptor subfamily 2,<br>group F, member 1                        | 2.21 |
| 209524_at   | HDGFRP3 | hepatoma-derived growth<br>factor, related protein 3                      | 2.37 |
| 209526_s_at | HDGFRP3 | hepatoma-derived growth<br>factor, related protein 3                      | 1.36 |
| 209529_at   | PPAP2C  | phosphatidic acid phosphatase<br>type 2C                                  | 1.68 |
| 209534_x_at | AKAP13  | A kinase (PRKA) anchor<br>protein 13                                      | 1.91 |
| 209536_s_at | EHD4    | EH-domain containing 4                                                    | 1.59 |
| 209539_at   | ARHGEF6 | Rac/Cdc42 guanine nucleotide<br>exchange factor (GEF) 6                   | 2.1  |

|             |          |                                                                                                |           |
|-------------|----------|------------------------------------------------------------------------------------------------|-----------|
| 209545_s_at | RIPK2    | receptor-interacting serine-threonine kinase 2                                                 | 1.65      |
| 209550_at   | NDN      | necdin homolog (mouse)                                                                         | 1.98      |
| 209568_s_at | RGL1     | ral guanine nucleotide dissociation stimulator-like 1                                          | 1.7       |
| 209584_x_at | APOBEC3C | apolipoprotein B mRNA editing enzyme, catalytic polypeptide-like 3C                            | 1.34      |
| 209594_x_at | PSG9     | pregnancy specific beta-1-glycoprotein 9                                                       | -<br>1.37 |
| 209598_at   | PNMA2    | paraneoplastic antigen MA2                                                                     | 1.45      |
| 209604_s_at | GATA3    | GATA binding protein 3                                                                         | 1.32      |
| 209617_s_at | CTNND2   | catenin (cadherin-associated protein), delta 2 (neural plakophilin-related arm-repeat protein) | 1.17      |
| 209626_s_at | OSBPL3   | oxysterol binding protein-like 3                                                               | 1.5       |

|             |         |                                                                        |           |
|-------------|---------|------------------------------------------------------------------------|-----------|
| 209639_s_at | RGS12   | regulator of G-protein signaling<br>12                                 | -<br>1.33 |
| 209651_at   | TGFB1I1 | transforming growth factor beta<br>1 induced transcript 1              | 2.45      |
| 209656_s_at | TMEM47  | transmembrane protein 47                                               | 1.76      |
| 209670_at   | TRAC    | T cell receptor alpha constant                                         | 2.74      |
| 209682_at   | CBLB    | Cas-Br-M (murine) ecotropic<br>retroviral transforming<br>sequence b   | 3.01      |
| 209683_at   | FAM49A  | family with sequence similarity<br>49, member A                        | 1.51      |
| 209685_s_at | PRKCB1  | protein kinase C, beta 1                                               | 2.04      |
| 209725_at   | UTP20   | UTP20, small subunit (SSU)<br>processome component,<br>homolog (yeast) | -<br>1.42 |

|             |         |                                                            |           |
|-------------|---------|------------------------------------------------------------|-----------|
| 209732_at   | CLEC2B  | C-type lectin domain family 2,<br>member B                 | 3.05      |
| 209750_at   | NR1D2   | nuclear receptor subfamily 1,<br>group D, member 2         | 2.77      |
| 209751_s_at | SEDLP   | spondyloepiphyseal dysplasia,<br>late, pseudogene          | 2         |
| 209761_s_at | SP110   | SP110 nuclear body protein                                 | 2.33      |
| 209762_x_at | SP110   | SP110 nuclear body protein                                 | 1.92      |
| 209763_at   | CHRDL1  | chordin-like 1                                             | 1.84      |
| 209770_at   | BTN3A1  | butyrophilin, subfamily 3,<br>member A1                    | 2.03      |
| 209777_s_at | SLC19A1 | solute carrier family 19 (folate<br>transporter), member 1 | -<br>1.65 |
| 209787_s_at | HMGN4   | high mobility group<br>nucleosomal binding domain 4        | 1.98      |



|             |          |                                                                   |           |
|-------------|----------|-------------------------------------------------------------------|-----------|
| 209804_at   | DCLRE1A  | DNA cross-link repair 1A<br>(PSO2 homolog, <i>S. cerevisiae</i> ) | -<br>1.37 |
| 209813_x_at | TRGV9    | T cell receptor gamma variable<br>9                               | 1.53      |
| 209815_at   | PTCH1    | patched homolog 1<br>( <i>Drosophila</i> )                        | 1.6       |
| 209823_x_at | HLA-DQB1 | major histocompatibility<br>complex, class II, DQ beta 1          | 3.64      |
| 209835_x_at | CD44     | CD44 molecule (Indian blood<br>group)                             | 1.8       |
| 209846_s_at | BTN3A2   | butyrophilin, subfamily 3,<br>member A2                           | 2.47      |

|             |        |                                                                         |      |
|-------------|--------|-------------------------------------------------------------------------|------|
| 209868_s_at | RBMS1  | RNA binding motif, single stranded interacting protein 1                | 3.29 |
| 209869_at   | ADRA2A | adrenergic, alpha-2A-, receptor                                         | 1.75 |
| 209874_x_at | CNNM2  | cyclin M2                                                               | 1.32 |
| 209879_at   | SELPLG | selectin P ligand                                                       | 1.38 |
| 209882_at   | RIT1   | Ras-like without CAAX 1                                                 | 1.49 |
| 209892_at   | FUT4   | fucosyltransferase 4 (alpha (1,3) fucosyltransferase, myeloid-specific) | 1.64 |
| 209897_s_at | SLIT2  | slit homolog 2 (Drosophila)                                             | 1.81 |
| 209901_x_at | AIF1   | allograft inflammatory factor 1                                         | 2.29 |

|             |        |                                                                                         |      |
|-------------|--------|-----------------------------------------------------------------------------------------|------|
| 209906_at   | C3AR1  | complement component 3a<br>receptor 1                                                   | 1.86 |
| 209933_s_at | CD300A | CD300a molecule                                                                         | 1.68 |
| 209946_at   | VEGFC  | vascular endothelial growth<br>factor C                                                 | 1.84 |
| 209947_at   | UBAP2L | ubiquitin associated protein 2-<br>like                                                 | -1.3 |
| 209955_s_at | FAP    | fibroblast activation protein,<br>alpha                                                 | 1.97 |
| 209969_s_at | STAT1  | signal transducer and activator<br>of transcription 1, 91kDa                            | 2.68 |
| 209970_x_at | CASP1  | caspase 1, apoptosis-related<br>cysteine peptidase (interleukin<br>1, beta, convertase) | 2.26 |
| 209993_at   | ABCB1  | ATP-binding cassette, sub-<br>family B (MDR/TAP), member<br>1                           | 1.56 |

|             |        |                                                                          |           |
|-------------|--------|--------------------------------------------------------------------------|-----------|
| 209994_s_at | ABCB1  | ATP-binding cassette, sub-family B (MDR/TAP), member 1                   | 1.97      |
| 210013_at   | HPX    | hemopexin                                                                | -<br>1.68 |
| 210033_s_at | SPAG6  | sperm associated antigen 6                                               | -<br>1.14 |
| 210079_x_at | KCNAB1 | potassium voltage-gated channel, shaker-related subfamily, beta member 1 | -<br>1.28 |
| 210080_x_at | ELA3A  | elastase 3A, pancreatic                                                  | -1.4      |
| 210084_x_at | TPSAB1 | tryptase alpha/beta 1                                                    | 2.46      |
| 210088_x_at | MYL4   | myosin, light chain 4, alkali; atrial, embryonic                         | -<br>1.27 |
| 210095_s_at | IGFBP3 | insulin-like growth factor binding protein 3                             | 2.19      |

|             |         |                                                                                   |           |
|-------------|---------|-----------------------------------------------------------------------------------|-----------|
| 210105_s_at | FYN     | FYN oncogene related to SRC,<br>FGR, YES                                          | 2.38      |
| 210109_at   | C7orf54 | chromosome 7 open reading<br>frame 54                                             | -<br>1.52 |
| 210129_s_at | TTL3    | tubulin tyrosine ligase-like<br>family, member 3                                  | 1.43      |
| 210134_x_at | SHOX2   | short stature homeobox 2                                                          | -<br>1.27 |
| 210140_at   | CST7    | cystatin F (leukocystatin)                                                        | 1.88      |
| 210145_at   | PLA2G4A | phospholipase A2, group IVA<br>(cytosolic, calcium-dependent)                     | 1.66      |
| 210155_at   | MYOC    | myocilin, trabecular meshwork<br>inducible glucocorticoid<br>response             | -<br>1.29 |
| 210162_s_at | NFATC1  | nuclear factor of activated T-<br>cells, cytoplasmic, calcineurin-<br>dependent 1 | 1.55      |

|             |         |                                                                              |           |
|-------------|---------|------------------------------------------------------------------------------|-----------|
|             |         |                                                                              |           |
| 210164_at   | GZMB    | granzyme B (granzyme 2, cytotoxic T-lymphocyte-associated serine esterase 1) | 1.35      |
| 210169_at   | SEC14L5 | SEC14-like 5 ( <i>S. cerevisiae</i> )                                        | -<br>1.17 |
| 210170_at   | PDLIM3  | PDZ and LIM domain 3                                                         | 1.75      |
| 210174_at   | NR5A2   | nuclear receptor subfamily 5, group A, member 2                              | -<br>1.93 |
| 210203_at   | CNOT4   | CCR4-NOT transcription complex, subunit 4                                    | 1.14      |
| 210215_at   | TFR2    | transferrin receptor 2                                                       | -<br>1.91 |
| 210218_s_at | SP100   | SP100 nuclear antigen                                                        | 2.02      |
| 210260_s_at | TNFAIP8 | tumor necrosis factor, alpha-induced protein 8                               | 2.83      |

|             |        |                                                                                    |           |
|-------------|--------|------------------------------------------------------------------------------------|-----------|
| 210276_s_at | TRIOBP | TRIO and F-actin binding protein                                                   | 1.75      |
| 210283_x_at | PAIP1  | poly(A) binding protein interacting protein 1                                      | -<br>1.48 |
| 210298_x_at | FHL1   | four and a half LIM domains 1                                                      | 1.82      |
| 210299_s_at | FHL1   | four and a half LIM domains 1                                                      | 2.48      |
| 210311_at   | FGF5   | fibroblast growth factor 5                                                         | -<br>1.23 |
| 210339_s_at | KLK2   | kallikrein-related peptidase 2                                                     | -<br>1.55 |
| 210340_s_at | CSF2RA | colony stimulating factor 2 receptor, alpha, low-affinity (granulocyte-macrophage) | 1.39      |
| 210345_s_at | DNAH9  | dynein, axonemal, heavy chain 9                                                    | -<br>1.25 |
| 210376_x_at | ELK1   | ELK1, member of ETS oncogene family                                                | -<br>1.41 |

|             |         |                                                                |           |
|-------------|---------|----------------------------------------------------------------|-----------|
| 210393_at   | LGR5    | leucine-rich repeat-containing<br>G protein-coupled receptor 5 | -<br>1.16 |
| 210395_x_at | MYL4    | myosin, light chain 4, alkali;<br>atrial, embryonic            | -<br>1.27 |
| 210399_x_at | FUT6    | fucosyltransferase 6 (alpha<br>(1,3) fucosyltransferase)       | -<br>1.42 |
| 210400_at   | GRIN2C  | glutamate receptor, ionotropic,<br>N-methyl D-aspartate 2C     | -<br>1.19 |
| 210425_x_at | GOLGA8B | golgi autoantigen, golgin<br>subfamily a, 8B                   | -<br>2.06 |
| 210430_x_at | RHD     | Rh blood group, D antigen                                      | -<br>1.39 |
| 210438_x_at | TROVE2  | TROVE domain family,<br>member 2                               | -<br>1.46 |
| 210467_x_at | MAGEA12 | melanoma antigen family A, 12                                  | -<br>1.15 |



|             |        |                                              |           |
|-------------|--------|----------------------------------------------|-----------|
| 210473_s_at | GPR125 | G protein-coupled receptor 125               | -<br>2.67 |
| 210476_s_at | PRLR   | prolactin receptor                           | -<br>1.33 |
| 210514_x_at | HLA-G  | HLA-G histocompatibility antigen, class I, G | 1.76      |
| 210524_x_at |        | NA                                           | -2.4      |
| 210527_x_at | TUBA3C | tubulin, alpha 3c                            | -<br>1.53 |
| 210554_s_at | CTBP2  | C-terminal binding protein 2                 | 1.94      |
| 210561_s_at | WSB1   | WD repeat and SOCS box-containing 1          | 2.02      |
| 210565_at   | GCGR   | glucagon receptor                            | -<br>1.58 |
| 210586_x_at | RHD    | Rh blood group, D antigen                    | -<br>1.32 |
| 210611_s_at | DTNA   | dystrobrevin, alpha                          | 1.12      |

|             |        |                                                                                                                |           |
|-------------|--------|----------------------------------------------------------------------------------------------------------------|-----------|
| 210617_at   | PHEX   | phosphate regulating<br>endopeptidase homolog, X-<br>linked (hypophosphatemia,<br>vitamin D resistant rickets) | -<br>1.26 |
| 210635_s_at | KLHL20 | kelch-like 20 (Drosophila)                                                                                     | 1.45      |
| 210640_s_at | GPER   | G protein-coupled estrogen<br>receptor 1                                                                       | -<br>2.11 |
| 210657_s_at | 4-Sep  | septin 4                                                                                                       | 1.83      |
| 210690_at   | KLRC4  | killer cell lectin-like receptor<br>subfamily C, member 4                                                      | 1.06      |
| 210695_s_at | WWOX   | WW domain containing<br>oxidoreductase                                                                         | -1.4      |
| 210717_at   |        | NA                                                                                                             | 1.44      |
| 210734_x_at | MAX    | MYC associated factor X                                                                                        | 1.42      |

|             |          |                                                                     |           |
|-------------|----------|---------------------------------------------------------------------|-----------|
| 210738_s_at | SLC4A4   | solute carrier family 4, sodium bicarbonate cotransporter, member 4 | 1.56      |
| 210760_x_at | TRIP11   | thyroid hormone receptor interactor 11                              | -<br>1.27 |
| 210785_s_at | C1orf38  | chromosome 1 open reading frame 38                                  | 2.54      |
| 210796_x_at | SIGLEC6  | sialic acid binding Ig-like lectin 6                                | -<br>1.28 |
| 210803_at   | TXNRD2   | thioredoxin reductase 2                                             | -<br>1.27 |
| 210804_x_at | SLC8A1   | solute carrier family 8 (sodium/calcium exchanger), member 1        | -<br>1.18 |
| 210817_s_at | CALCOCO2 | calcium binding and coiled-coil domain 2                            | 1.37      |

|             |        |                                                                 |           |
|-------------|--------|-----------------------------------------------------------------|-----------|
| 210832_x_at | PTGER3 | prostaglandin E receptor 3<br>(subtype EP3)                     | -<br>1.25 |
| 210840_s_at | IQGAP1 | IQ motif containing GTPase<br>activating protein 1              | 1.95      |
| 210849_s_at | VPS41  | vacuolar protein sorting 41<br>homolog ( <i>S. cerevisiae</i> ) | 1.44      |
| 210864_x_at | HFE    | hemochromatosis                                                 | -<br>1.35 |
| 210883_x_at | EFNB3  | ephrin-B3                                                       | -1.4      |
| 210888_s_at | ITIH1  | inter-alpha (globulin) inhibitor<br>H1                          | -<br>2.03 |
| 210916_s_at | CD44   | CD44 molecule (Indian blood<br>group)                           | 1.32      |
| 210924_at   | OLFM1  | olfactomedin 1                                                  | -<br>1.48 |
| 210970_s_at | IBTK   | inhibitor of Bruton<br>agammaglobulinemia tyrosine<br>kinase    | -<br>2.38 |
| 210976_s_at | PFKM   | phosphofructokinase, muscle                                     | 1.75      |

|             |        |                                                            |           |
|-------------|--------|------------------------------------------------------------|-----------|
| 210980_s_at | ASAH1  | N-acylsphingosine<br>amidohydrolase (acid<br>ceramidase) 1 | 1.54      |
| 210987_x_at | TPM1   | tropomyosin 1 (alpha)                                      | 2.56      |
| 210991_s_at | RIMS3  | regulating synaptic membrane<br>exocytosis 3               | -<br>1.29 |
| 211023_at   | PDHB   | pyruvate dehydrogenase<br>(lipoamide) beta                 | -<br>1.41 |
| 211051_s_at | EXTL3  | exostoses (multiple)-like 3                                | -<br>1.42 |
| 211068_x_at | FAM21C | family with sequence similarity<br>21, member C            | 2.1       |
| 211073_x_at | RPL3   | ribosomal protein L3                                       | 1.37      |
| 211081_s_at | MAP4K5 | mitogen-activated protein<br>kinase kinase kinase kinase 5 | 1.22      |
| 211085_s_at | STK4   | serine/threonine kinase 4                                  | 1.63      |

|             |        |                                                                                                                    |           |
|-------------|--------|--------------------------------------------------------------------------------------------------------------------|-----------|
| 211123_at   | SLC5A5 | solute carrier family 5 (sodium iodide symporter), member 5                                                        | -<br>1.71 |
| 211154_at   | THPO   | thrombopoietin<br>(myeloproliferative leukemia virus oncogene ligand, megakaryocyte growth and development factor) | -<br>1.24 |
| 211161_s_at | COL3A1 | collagen, type III, alpha 1<br>(Ehlers-Danlos syndrome type IV, autosomal dominant)                                | 2.74      |
| 211185_s_at | HIATL1 | hippocampus abundant transcript-like 1                                                                             | 1.63      |
| 211201_at   | FSHR   | follicle stimulating hormone receptor                                                                              | -<br>1.19 |

|             |        |                                                   |           |
|-------------|--------|---------------------------------------------------|-----------|
| 211238_at   | ADAM7  | ADAM metallopeptidase<br>domain 7                 | -1.2      |
| 211254_x_at | RHAG   | Rh-associated glycoprotein                        | -<br>1.28 |
| 211261_at   | NUP214 | nucleoporin 214kDa                                | -<br>1.42 |
| 211262_at   | PCSK6  | proprotein convertase<br>subtilisin/kexin type 6  | -<br>1.64 |
| 211284_s_at | GRN    | granulin                                          | 1.61      |
| 211296_x_at | UBC    | ubiquitin C                                       | 1.31      |
| 211320_s_at | PTPRU  | protein tyrosine phosphatase,<br>receptor type, U | -<br>1.33 |
| 211328_x_at | HFE    | hemochromatosis                                   | -<br>1.28 |
| 211339_s_at | ITK    | IL2-inducible T-cell kinase                       | 3.9       |
| 211340_s_at | MCAM   | melanoma cell adhesion<br>molecule                | 2.16      |
| 211354_s_at | LEPR   | leptin receptor                                   | 4.08      |
| 211355_x_at | LEPR   | leptin receptor                                   | 3.72      |

|             |         |                                                                                         |           |
|-------------|---------|-----------------------------------------------------------------------------------------|-----------|
| 211356_x_at | LEPR    | leptin receptor                                                                         | 3.92      |
| 211366_x_at | CASP1   | caspase 1, apoptosis-related<br>cysteine peptidase (interleukin<br>1, beta, convertase) | 2.46      |
| 211367_s_at | CASP1   | caspase 1, apoptosis-related<br>cysteine peptidase (interleukin<br>1, beta, convertase) | 2.87      |
| 211381_x_at | SPAG11B | sperm associated antigen 11B                                                            | -<br>1.29 |
| 211388_s_at |         | NA                                                                                      | -<br>1.18 |



|             |          |                                                                                                                                                                                                                |           |
|-------------|----------|----------------------------------------------------------------------------------------------------------------------------------------------------------------------------------------------------------------|-----------|
| 211401_s_at | FGFR2    | fibroblast growth factor<br>receptor 2 (bacteria-expressed<br>kinase, keratinocyte growth<br>factor receptor, craniofacial<br>dysostosis 1, Crouzon<br>syndrome, Pfeiffer syndrome,<br>Jackson-Weiss syndrome) | 2.24      |
| 211405_x_at | IFNA17   | interferon, alpha 17                                                                                                                                                                                           | -<br>1.33 |
| 211429_s_at | SERPINA1 | serpin peptidase inhibitor, clade<br>A (alpha-1 antiproteinase,<br>antitrypsin), member 1                                                                                                                      | -<br>1.19 |
| 211433_x_at | KIAA1539 | KIAA1539                                                                                                                                                                                                       | -<br>1.33 |
| 211438_at   | TRHR     | thyrotropin-releasing hormone<br>receptor                                                                                                                                                                      | -<br>1.53 |
| 211446_at   | RGSL2    | regulator of G-protein signaling<br>like 2                                                                                                                                                                     | -<br>1.25 |

|             |          |                                                           |           |
|-------------|----------|-----------------------------------------------------------|-----------|
| 211456_x_at | MT1P2    | metallothionein 1 pseudogene 2                            | -<br>1.48 |
| 211472_at   | PLXNB2   | plexin B2                                                 | -<br>1.26 |
| 211474_s_at | SERPINB6 | serpin peptidase inhibitor, clade B (ovalbumin), member 6 | 1.41      |
| 211497_x_at | NKX3-1   | NK3 homeobox 1                                            | -<br>1.31 |
| 211504_x_at | ROCK2    | Rho-associated, coiled-coil containing protein kinase 2   | -<br>1.34 |
| 211506_s_at | IL8      | interleukin 8                                             | 3.82      |
| 211528_x_at | HLA-G    | HLA-G histocompatibility                                  | 1.82      |

|             |         |                                                                                              |           |
|-------------|---------|----------------------------------------------------------------------------------------------|-----------|
|             |         | antigen, class I, G                                                                          |           |
| 211529_x_at | HLA-G   | HLA-G histocompatibility<br>antigen, class I, G                                              | 1.94      |
| 211530_x_at | HLA-G   | HLA-G histocompatibility<br>antigen, class I, G                                              | 1.43      |
| 211535_s_at | FGFR1   | fibroblast growth factor<br>receptor 1 (fms-related tyrosine<br>kinase 2, Pfeiffer syndrome) | 1.59      |
| 211544_s_at | GHRHR   | growth hormone releasing<br>hormone receptor                                                 | -<br>1.41 |
| 211555_s_at | GUCY1B3 | guanylate cyclase 1, soluble,<br>beta 3                                                      | 1.72      |
| 211559_s_at | CCNG2   | cyclin G2                                                                                    | 1.6       |
| 211571_s_at | VCAN    | versican                                                                                     | 2.6       |
| 211587_x_at | CHRNA3  | cholinergic receptor, nicotinic,<br>alpha 3                                                  | -<br>1.37 |

|             |           |                                                                                                                                            |           |
|-------------|-----------|--------------------------------------------------------------------------------------------------------------------------------------------|-----------|
| 211597_s_at | HOP       | homeodomain-only protein                                                                                                                   | 1.75      |
| 211621_at   | AR        | androgen receptor<br>(dihydrotestosterone receptor;<br>testicular feminization; spinal<br>and bulbar muscular atrophy;<br>Kennedy disease) | -<br>1.89 |
| 211631_x_at | B4GALT1   | UDP-Gal:betaGlcNAc beta 1,4-<br>galactosyltransferase,<br>polypeptide 1                                                                    | -<br>1.45 |
| 211633_x_at | IGHG1     | immunoglobulin heavy<br>constant gamma 1 (G1m<br>marker)                                                                                   | 3.47      |
| 211634_x_at | IGHV1-69  | immunoglobulin heavy variable<br>1-69                                                                                                      | 4.77      |
| 211635_x_at | IGHV1-69  | immunoglobulin heavy variable<br>1-69                                                                                                      | 3.03      |
| 211637_x_at | LOC652128 | similar to Ig heavy chain V-II<br>region ARH-77 precursor                                                                                  | 5.07      |

|             |          |                                                          |           |
|-------------|----------|----------------------------------------------------------|-----------|
| 211639_x_at | SKAP2    | src kinase associated<br>phosphoprotein 2                | 3.02      |
| 211640_x_at | IGHV1-69 | immunoglobulin heavy variable<br>1-69                    | 2.69      |
| 211641_x_at |          | NA                                                       | 1.65      |
| 211643_x_at | IGKC     | immunoglobulin kappa<br>constant                         | 5.3       |
| 211644_x_at | IGKC     | immunoglobulin kappa<br>constant                         | 16.0<br>4 |
| 211647_x_at | IGHG1    | immunoglobulin heavy<br>constant gamma 1 (G1m<br>marker) | 1.31      |
| 211649_x_at | IGHG1    | immunoglobulin heavy<br>constant gamma 1 (G1m<br>marker) | 2.22      |
| 211650_x_at | IL8      | interleukin 8                                            | 2.99      |

|             |         |                                                                                 |      |
|-------------|---------|---------------------------------------------------------------------------------|------|
|             |         |                                                                                 |      |
| 211658_at   | PRDX2   | peroxiredoxin 2                                                                 | 1.31 |
| 211662_s_at | VDAC2   | voltage-dependent anion<br>channel 2                                            | 1.72 |
| 211663_x_at | PTGDS   | prostaglandin D2 synthase<br>21kDa (brain)                                      | 3.35 |
| 211671_s_at | NR3C1   | nuclear receptor subfamily 3,<br>group C, member 1<br>(glucocorticoid receptor) | 1.55 |
| 211684_s_at | DYNC1I2 | dynein, cytoplasmic 1,<br>intermediate chain 2                                  | 1.87 |
| 211696_x_at | HBB     | hemoglobin, beta                                                                | 6.06 |
| 211699_x_at | HBA1    | hemoglobin, alpha 1                                                             | 5.78 |
| 211703_s_at | TM2D1   | TM2 domain containing 1                                                         | 1.6  |
| 211704_s_at | SPIN2B  | spindlin family, member 2B                                                      | 1.24 |

|             |         |                                                                                   |      |
|-------------|---------|-----------------------------------------------------------------------------------|------|
| 211729_x_at | BLVRA   | biliverdin reductase A                                                            | 2.39 |
| 211734_s_at | FCER1A  | Fc fragment of IgE, high affinity I, receptor for; alpha polypeptide              | 2.24 |
| 211737_x_at | PTN     | pleiotrophin (heparin binding growth factor 8, neurite growth-promoting factor 1) | 1.93 |
| 211738_x_at | ELA3A   | elastase 3A, pancreatic                                                           | -1.3 |
| 211742_s_at | EVI2B   | ecotropic viral integration site 2B                                               | 2.98 |
| 211745_x_at | HBA2    | hemoglobin, alpha 2                                                               | 5.33 |
| 211749_s_at | VAMP3   | vesicle-associated membrane protein 3 (cellubrevin)                               | 2.07 |
| 211776_s_at | EPB41L3 | erythrocyte membrane protein band 4.1-like 3                                      | 1.64 |

|             |          |                                                                    |           |
|-------------|----------|--------------------------------------------------------------------|-----------|
| 211798_x_at | IGLJ3    | immunoglobulin lambda<br>joining 3                                 | 5.5       |
| 211799_x_at | HLA-C    | major histocompatibility<br>complex, class I, C                    | 1.99      |
| 211800_s_at | USP4     | ubiquitin specific peptidase 4<br>(proto-oncogene)                 | 1.53      |
| 211805_s_at | SLC8A1   | solute carrier family 8<br>(sodium/calcium exchanger),<br>member 1 | -<br>1.24 |
| 211835_at   | IGHV4-31 | immunoglobulin heavy variable<br>4-31                              | 1.36      |
| 211858_x_at | GNAS     | GNAS complex locus                                                 | 1.84      |
| 211864_s_at | FER1L3   | fer-1-like 3, myoferlin (C.<br>elegans)                            | 1.62      |
| 211868_x_at | IFI6     | interferon, alpha-inducible<br>protein 6                           | 2.92      |



|             |        |                                              |      |
|-------------|--------|----------------------------------------------|------|
|             |        |                                              | -    |
| 211870_s_at | PCDHA3 | protocadherin alpha 3                        | 1.37 |
| 211902_x_at | TRA@   | T cell receptor alpha locus                  | 1.39 |
|             |        |                                              |      |
| 211908_x_at | IL8    | interleukin 8                                | 2.17 |
| 211911_x_at | HLA-B  | major histocompatibility complex, class I, B | 2.68 |
| 211926_s_at | MYH9   | myosin, heavy chain 9, non-muscle            | 1.86 |
| 211929_at   | HNRPA3 | heterogeneous nuclear ribonucleoprotein A3   | 1.9  |

|             |        |                                                        |           |
|-------------|--------|--------------------------------------------------------|-----------|
| 211938_at   | EIF4B  | eukaryotic translation initiation<br>factor 4B         | 1.46      |
| 211940_x_at | H3F3A  | H3 histone, family 3A                                  | 1.51      |
| 211944_at   | BAT2D1 | BAT2 domain containing 1                               | 1.94      |
| 211963_s_at | ARPC5  | actin related protein 2/3<br>complex, subunit 5, 16kDa | 1.62      |
| 211966_at   | COL4A2 | collagen, type IV, alpha 2                             | 2.64      |
| 211973_at   |        | NA                                                     | -<br>1.42 |
| 211977_at   | GPR107 | G protein-coupled receptor 107                         | -<br>1.53 |
| 211981_at   | COL4A1 | collagen, type IV, alpha 1                             | 4.28      |

|             |         |                                                                                                   |           |
|-------------|---------|---------------------------------------------------------------------------------------------------|-----------|
| 211989_at   | SMARCE1 | SWI/SNF related, matrix associated, actin dependent regulator of chromatin, subfamily e, member 1 | 1.42      |
| 211997_x_at | H3F3B   | H3 histone, family 3B (H3.3B)                                                                     | 1.86      |
| 211998_at   | H3F3B   | H3 histone, family 3B (H3.3B)                                                                     | 1.66      |
| 211999_at   | H3F3B   | H3 histone, family 3B (H3.3B)                                                                     | 2.07      |
| 212021_s_at | MKI67   | antigen identified by monoclonal antibody Ki-67                                                   | -<br>1.25 |
| 212039_x_at | RPL3    | ribosomal protein L3                                                                              | 1.33      |
| 212044_s_at | RPL27A  | ribosomal protein L27a                                                                            | 1.69      |
| 212063_at   | CD44    | CD44 molecule (Indian blood group)                                                                | 4.61      |
| 212067_s_at | C1R     | complement component 1, r subcomponent                                                            | -<br>1.44 |

|             |         |                                                                                             |      |
|-------------|---------|---------------------------------------------------------------------------------------------|------|
| 212074_at   | UNC84A  | unc-84 homolog A (C. elegans)                                                               | 1.65 |
| 212077_at   | CALD1   | caldesmon 1                                                                                 | 1.41 |
| 212080_at   | MLL     | myeloid/lymphoid or mixed-lineage leukemia (trithorax homolog, Drosophila)                  | 1.49 |
| 212085_at   | SLC25A6 | solute carrier family 25 (mitochondrial carrier; adenine nucleotide translocator), member 6 | 2.3  |
| 212086_x_at | LMNA    | lamin A/C                                                                                   | 1.78 |
| 212087_s_at | ERAL1   | Era G-protein-like 1 (E. coli)                                                              | 1.39 |
| 212097_at   | CAV1    | caveolin 1, caveolae protein, 22kDa                                                         | 3.12 |
| 212102_s_at | KPNA6   | karyopherin alpha 6 (importin alpha 7)                                                      | 1.22 |

|             |        |                                                                          |           |
|-------------|--------|--------------------------------------------------------------------------|-----------|
| 212111_at   | STX12  | syntaxin 12                                                              | 1.47      |
| 212130_x_at | EIF1   | eukaryotic translation initiation<br>factor 1                            | 1.65      |
| 212140_at   | PDS5A  | PDS5, regulator of cohesion<br>maintenance, homolog A (S.<br>cerevisiae) | -<br>1.56 |
| 212143_s_at | IGFBP3 | insulin-like growth factor<br>binding protein 3                          | 2.69      |
| 212148_at   | PBX1   | pre-B-cell leukemia homeobox<br>1                                        | 2.92      |
| 212153_at   | POGZ   | pogo transposable element with<br>ZNF domain                             | 1.39      |
| 212155_at   | RNF187 | ring finger protein 187                                                  | -<br>1.58 |

|             |          |                                                           |           |
|-------------|----------|-----------------------------------------------------------|-----------|
| 212161_at   | AP2A2    | adaptor-related protein complex<br>2, alpha 2 subunit     | -<br>1.33 |
| 212168_at   | RBM12    | RNA binding motif protein 12                              | 2.04      |
| 212169_at   | FKBP9    | FK506 binding protein 9, 63<br>kDa                        | 1.63      |
| 212172_at   | AK2      | adenylate kinase 2                                        | -1.3      |
| 212173_at   | AK2      | adenylate kinase 2                                        | -<br>1.29 |
| 212180_at   | CRKL     | v-crk sarcoma virus CT10<br>oncogene homolog (avian)-like | -<br>1.45 |
| 212197_x_at | M-RIP    | myosin phosphatase-Rho<br>interacting protein             | 1.66      |
| 212201_at   | KIAA0692 | KIAA0692                                                  | 1.33      |
| 212212_s_at | INTS1    | integrator complex subunit 1                              | -<br>1.42 |

|             |          |                                                    |      |
|-------------|----------|----------------------------------------------------|------|
|             |          | eukaryotic translation initiation                  |      |
| 212227_x_at | EIF1     | factor 1                                           | 1.9  |
| 212231_at   | FBXO21   | F-box protein 21                                   | 1.6  |
| 212232_at   | FNBP4    | formin binding protein 4                           | 1.85 |
| 212233_at   |          | NA                                                 | 1.94 |
|             |          |                                                    |      |
| 212259_s_at | PBXIP1   | pre-B-cell leukemia homeobox interacting protein 1 | 1.36 |
| 212266_s_at | SFRS5    | splicing factor, arginine/serine-rich 5            | 1.72 |
| 212273_x_at | GNAS     | GNAS complex locus                                 | 1.52 |
|             |          |                                                    | -    |
| 212283_at   | AGRN     | agrin                                              | 1.41 |
| 212288_at   | FNBP1    | formin binding protein 1                           | 1.53 |
| 212311_at   | KIAA0746 | KIAA0746 protein                                   | 3.49 |
| 212318_at   | TNPO3    | transportin 3                                      | 1.45 |
| 212337_at   | TUG1     | taurine upregulated gene 1                         | 1.66 |
|             |          |                                                    |      |
| 212366_at   | ZNF292   | zinc finger protein 292                            | 1.51 |

|             |        |                                                                               |      |
|-------------|--------|-------------------------------------------------------------------------------|------|
|             |        |                                                                               |      |
| 212370_x_at | FAM21A | family with sequence similarity<br>21, member A                               | 1.85 |
| 212385_at   | TCF4   | transcription factor 4                                                        | 2.22 |
| 212399_s_at | VGLL4  | vestigial like 4 (Drosophila)                                                 | 1.75 |
| 212415_at   | 6-Sep  | septin 6                                                                      | 1.67 |
| 212418_at   | ELF1   | E74-like factor 1 (ets domain<br>transcription factor)                        | 1.99 |
| 212420_at   | ELF1   | E74-like factor 1 (ets domain<br>transcription factor)                        | 2.01 |
| 212445_s_at | NEDD4L | neural precursor cell expressed,<br>developmentally down-<br>regulated 4-like | 1.97 |
| 212447_at   | KBTBD2 | kelch repeat and BTB (POZ)<br>domain containing 2                             | 1.52 |



|             |           |                                                                                |      |
|-------------|-----------|--------------------------------------------------------------------------------|------|
| 212453_at   | KIAA1279  | KIAA1279                                                                       | 1.85 |
| 212460_at   | C14orf147 | chromosome 14 open reading<br>frame 147                                        | 1.96 |
| 212463_at   | CD59      | CD59 molecule, complement<br>regulatory protein                                | 1.53 |
| 212481_s_at | TPM4      | tropomyosin 4                                                                  | 1.95 |
| 212488_at   | COL5A1    | collagen, type V, alpha 1                                                      | 2.42 |
| 212489_at   | COL5A1    | collagen, type V, alpha 1                                                      | 1.49 |
| 212510_at   | GPD1L     | glycerol-3-phosphate<br>dehydrogenase 1-like                                   | 1.65 |
| 212572_at   | STK38L    | serine/threonine kinase 38 like                                                | 1.62 |
| 212579_at   | SMCHD1    | structural maintenance of<br>chromosomes flexible hinge<br>domain containing 1 | 2.54 |

|             |        |                                                                 |      |
|-------------|--------|-----------------------------------------------------------------|------|
| 212582_at   | OSBPL8 | oxysterol binding protein-like 8                                | 2.05 |
| 212586_at   | CAST   | calpastatin                                                     | 1.66 |
| 212587_s_at | PTPRC  | protein tyrosine phosphatase,<br>receptor type, C               | 4.88 |
| 212596_s_at | HMG2L1 | high-mobility group protein 2-<br>like 1                        | 1.62 |
| 212613_at   | BTN3A2 | butyrophilin, subfamily 3,<br>member A2                         | 1.7  |
| 212614_at   | ARID5B | AT rich interactive domain 5B<br>(MRF1-like)                    | 3.3  |
| 212617_at   | ZNF609 | zinc finger protein 609                                         | 1.31 |
| 212632_at   | STX7   | syntaxin 7                                                      | 1.81 |
| 212637_s_at | WWP1   | WW domain containing E3<br>ubiquitin protein ligase 1           | 2.77 |
| 212641_at   | HIVEP2 | human immunodeficiency virus<br>type I enhancer binding protein | 1.55 |

|             |         |                                                                                  |           |
|-------------|---------|----------------------------------------------------------------------------------|-----------|
|             |         | 2                                                                                |           |
| 212647_at   | RRAS    | related RAS viral (r-ras)<br>oncogene homolog                                    | 1.43      |
| 212675_s_at | CEP68   | centrosomal protein 68kDa                                                        | 2.21      |
| 212677_s_at | CEP68   | centrosomal protein 68kDa                                                        | 2.08      |
| 212687_at   | LIMS1   | LIM and senescent cell antigen-<br>like domains 1                                | 1.7       |
| 212689_s_at | JMJD1A  | jumonji domain containing 1A                                                     | 2.18      |
| 212708_at   | MSL-1   | male-specific lethal-1 homolog                                                   | 1.41      |
| 212717_at   | PLEKHM1 | pleckstrin homology domain<br>containing, family M (with<br>RUN domain) member 1 | -<br>1.34 |
| 212723_at   | JMJD6   | jumonji domain containing 6                                                      | 1.65      |
| 212725_s_at | TUG1    | taurine upregulated gene 1                                                       | 1.83      |

|             |          |                                                             |           |
|-------------|----------|-------------------------------------------------------------|-----------|
| 212747_at   | ANKS1A   | ankyrin repeat and sterile alpha motif domain containing 1A | 1.71      |
| 212753_at   | PCGF3    | polycomb group ring finger 3                                | 1.38      |
| 212764_at   | ZEB1     | zinc finger E-box binding homeobox 1                        | 1.72      |
| 212785_s_at | LARP7    | La ribonucleoprotein domain family, member 7                | 1.47      |
| 212789_at   | NCAPD3   | non-SMC condensin II complex, subunit D3                    | -<br>1.29 |
| 212795_at   | KIAA1033 | KIAA1033                                                    | 1.39      |
| 212813_at   | JAM3     | junctional adhesion molecule 3                              | 1.75      |

|             |         |                                                                                                      |           |
|-------------|---------|------------------------------------------------------------------------------------------------------|-----------|
| 212821_at   | PLEKHG3 | pleckstrin homology domain<br>containing, family G (with<br>RhoGef domain) member 3                  | -<br>1.41 |
| 212822_at   | HEG1    | HEG homolog 1 (zebrafish)                                                                            | 1.28      |
| 212824_at   | FUBP3   | far upstream element (FUSE)<br>binding protein 3                                                     | -<br>2.12 |
| 212826_s_at | SLC25A6 | solute carrier family 25<br>(mitochondrial carrier; adenine<br>nucleotide translocator),<br>member 6 | 1.95      |
| 212827_at   | IGHM    | immunoglobulin heavy<br>constant mu                                                                  | 1.89      |
| 212828_at   | SYNJ2   | synaptojanin 2                                                                                       | 1.67      |
| 212873_at   | HMHA1   | histocompatibility (minor) HA-<br>1                                                                  | 1.55      |
| 212878_s_at | KLC1    | kinesin light chain 1                                                                                | 1.72      |

|             |          |                                                          |      |
|-------------|----------|----------------------------------------------------------|------|
|             |          |                                                          |      |
| 212895_s_at | ABR      | active BCR-related gene                                  | 1.3  |
| 212922_s_at | SMYD2    | SET and MYND domain<br>containing 2                      | 1.91 |
| 212956_at   | TBC1D9   | TBC1 domain family, member<br>9 (with GRAM domain)       | 3.18 |
| 212980_at   | USP34    | ubiquitin specific peptidase 34                          | 1.89 |
| 212985_at   |          | NA                                                       | 1.91 |
| 212998_x_at | HLA-DQB1 | major histocompatibility<br>complex, class II, DQ beta 1 | 9.98 |
| 213001_at   | ANGPTL2  | angiopoietin-like 2                                      | 1.61 |
| 213028_at   | NFRKB    | nuclear factor related to kappaB<br>binding protein      | -1.3 |
| 213033_s_at | NFIB     | nuclear factor I/B                                       | 1.31 |

|             |          |                                                         |      |
|-------------|----------|---------------------------------------------------------|------|
| 213039_at   | ARHGEF18 | rho/rac guanine nucleotide exchange factor (GEF) 18     | 1.76 |
| 213044_at   | ROCK1    | Rho-associated, coiled-coil containing protein kinase 1 | 1.53 |
| 213047_x_at | SET      | SET translocation (myeloid leukemia-associated)         | 1.6  |
| 213065_at   | CCDC131  | coiled-coil domain containing 131                       | 1.76 |
| 213068_at   | DPT      | dermatopontin                                           | 7.54 |
| 213069_at   | HEG1     | HEG homolog 1 (zebrafish)                               | 2.01 |
| 213084_x_at | RPL23A   | ribosomal protein L23a                                  | 1.51 |
| 213094_at   | GPR126   | G protein-coupled receptor 126                          | 1.68 |
| 213095_x_at | AIF1     | allograft inflammatory factor 1                         | 2.15 |
| 213099_at   | ANGEL1   | angel homolog 1 (Drosophila)                            | 1.38 |

|             |            |                                                                                                                                                            |           |
|-------------|------------|------------------------------------------------------------------------------------------------------------------------------------------------------------|-----------|
| 213125_at   | OLFML2B    | olfactomedin-like 2B                                                                                                                                       | 1.29      |
| 213134_x_at | BTG3       | BTG family, member 3                                                                                                                                       | 2.15      |
| 213139_at   | SNAI2      | snail homolog 2 (Drosophila)                                                                                                                               | 5.62      |
| 213142_x_at | tcag7.1314 | hypothetical protein LOC54103                                                                                                                              | 2.36      |
| 213143_at   | LOC257407  | hypothetical protein<br>LOC257407                                                                                                                          | -<br>1.83 |
| 213151_s_at | 7-Sep      | septin 7                                                                                                                                                   | 2.02      |
| 213169_at   | SEMA5A     | sema domain, seven<br>thrombospondin repeats (type 1<br>and type 1-like),<br>transmembrane domain (TM)<br>and short cytoplasmic domain,<br>(semaphorin) 5A | 1.91      |



|             |          |                                                                                                  |           |
|-------------|----------|--------------------------------------------------------------------------------------------------|-----------|
| 213178_s_at | MAPK8IP3 | mitogen-activated protein<br>kinase 8 interacting protein 3                                      | 1.25      |
| 213182_x_at | CDKN1C   | cyclin-dependent kinase<br>inhibitor 1C (p57, Kip2)                                              | 1.73      |
| 213183_s_at | CDKN1C   | cyclin-dependent kinase<br>inhibitor 1C (p57, Kip2)                                              | 1.73      |
| 213193_x_at | TRBC1    | T cell receptor beta constant 1                                                                  | 3.15      |
| 213194_at   | ROBO1    | roundabout, axon guidance<br>receptor, homolog 1<br>(Drosophila)                                 | 2.76      |
| 213209_at   | TAF6L    | TAF6-like RNA polymerase II,<br>p300/CBP-associated factor<br>(PCAF)-associated factor,<br>65kDa | -<br>1.27 |
| 213232_at   | KIAA1467 | KIAA1467                                                                                         | -<br>1.32 |

|             |          |                                                            |           |
|-------------|----------|------------------------------------------------------------|-----------|
| 213236_at   | SASH1    | SAM and SH3 domain<br>containing 1                         | 1.51      |
| 213241_at   | PLXNC1   | plexin C1                                                  | 2.01      |
| 213242_x_at | KIAA0284 | KIAA0284                                                   | -<br>1.45 |
| 213281_at   | JUN      | jun oncogene                                               | 1.49      |
| 213285_at   | TMEM30B  | transmembrane protein 30B                                  | 3.04      |
| 213290_at   | COL6A2   | collagen, type VI, alpha 2                                 | 1.52      |
| 213294_at   |          | NA                                                         | 1.93      |
| 213317_at   | CLIC5    | chloride intracellular channel 5                           | 1.32      |
| 213326_at   | VAMP1    | vesicle-associated membrane<br>protein 1 (synaptobrevin 1) | 1.63      |
| 213341_at   | FEM1C    | fem-1 homolog c (C. elegans)                               | 1.72      |
| 213344_s_at | H2AFX    | H2A histone family, member X                               | -<br>1.39 |

|             |        |                                                     |      |
|-------------|--------|-----------------------------------------------------|------|
| 213348_at   | CDKN1C | cyclin-dependent kinase<br>inhibitor 1C (p57, Kip2) | 3.03 |
| 213363_at   | CA5BL  | carbonic anhydrase VB-like                          | 1.34 |
| 213364_s_at | SNX1   | sorting nexin 1                                     | 1.62 |
| 213392_at   | IQCK   | IQ motif containing K                               | 1.67 |
| 213397_x_at | ANG    | angiogenin, ribonuclease,<br>RNase A family, 5      | -1.6 |
| 213403_at   |        | NA                                                  | 1.65 |
| 213404_s_at | RHEB   | Ras homolog enriched in brain                       | 1.39 |
| 213413_at   | STON1  | stonin 1                                            | 2.72 |
| 213415_at   | CLIC2  | chloride intracellular channel 2                    | 2.07 |
| 213416_at   | CERKL  | ceramide kinase-like                                | 3.32 |

|             |        |                                                   |      |
|-------------|--------|---------------------------------------------------|------|
| 213422_s_at | MXRA8  | matrix-remodelling associated<br>8                | 1.47 |
| 213423_x_at | TUSC3  | tumor suppressor candidate 3                      | 3.29 |
| 213428_s_at | COL6A1 | collagen, type VI, alpha 1                        | 2.87 |
| 213438_at   | NFASC  | neurofascin homolog (chicken)                     | 2.55 |
| 213448_at   | MTX1   | metaxin 1                                         | 1.31 |
| 213451_x_at | TNXB   | tenascin XB                                       | 2.14 |
| 213460_x_at | NSUN5C | NOL1/NOP2/Sun domain<br>family, member 5C         | 1.36 |
| 213470_s_at | HNRPH1 | heterogeneous nuclear<br>ribonucleoprotein H1 (H) | 1.6  |

|             |        |                                                                                                       |           |
|-------------|--------|-------------------------------------------------------------------------------------------------------|-----------|
| 213475_s_at | ITGAL  | integrin, alpha L (antigen CD11A (p180), lymphocyte function-associated antigen 1; alpha polypeptide) | 1.34      |
| 213483_at   | PPWD1  | peptidylprolyl isomerase domain and WD repeat containing 1                                            | 1.79      |
| 213492_at   | COL2A1 | collagen, type II, alpha 1 (primary osteoarthritis, spondyloepiphyseal dysplasia, congenital)         | -<br>1.18 |
| 213505_s_at | SFRS14 | splicing factor, arginine/serine-rich 14                                                              | 1.39      |
| 213535_s_at | UBE2I  | ubiquitin-conjugating enzyme E2I (UBC9 homolog, yeast)                                                | 1.41      |

|             |               |                                                                                         |      |
|-------------|---------------|-----------------------------------------------------------------------------------------|------|
| 213537_at   | HLA-DPA1      | major histocompatibility complex, class II, DP alpha 1                                  | 1.96 |
| 213539_at   | CD3D          | CD3d molecule, delta (CD3-TCR complex)                                                  | 1.87 |
| 213546_at   | DKFZp586I1420 | hypothetical protein DKFZp586I1420                                                      | 1.71 |
| 213570_at   | EIF4E2        | eukaryotic translation initiation factor 4E family member 2                             | 1.26 |
| 213581_at   | PDCD2         | programmed cell death 2                                                                 | 1.45 |
| 213601_at   | SLIT1         | slit homolog 1 (Drosophila)                                                             | 1.23 |
| 213603_s_at | RAC2          | ras-related C3 botulinum toxin substrate 2 (rho family, small GTP binding protein Rac2) | 2.3  |
| 213604_at   |               | NA                                                                                      | -    |

|             |        |                                                    |           |
|-------------|--------|----------------------------------------------------|-----------|
|             |        |                                                    | 1.54      |
| 213619_at   | HNRPH1 | heterogeneous nuclear<br>ribonucleoprotein H1 (H)  | 1.83      |
| 213627_at   | MAGED2 | melanoma antigen family D, 2                       | 1.61      |
| 213629_x_at | MT1JP  | metallothionein 1J<br>(pseudogene)                 | -2.6      |
| 213631_x_at | DHODH  | dihydroorotate dehydrogenase                       | -3.3      |
| 213648_at   | EXOSC7 | exosome component 7                                | -<br>1.23 |
| 213649_at   | SFRS7  | splicing factor, arginine/serine-<br>rich 7, 35kDa | 1.98      |
| 213652_at   | PCSK5  | proprotein convertase<br>subtilisin/kexin type 5   | 1.28      |
| 213670_x_at | NSUN5B | NOL1/NOP2/Sun domain<br>family, member 5B          | 1.45      |
| 213694_at   | RSBN1  | round spermatid basic protein 1                    | 1.7       |
| 213698_at   | ZMYM6  | zinc finger, MYM-type 6                            | 2.48      |

|             |           |                                                                                      |           |
|-------------|-----------|--------------------------------------------------------------------------------------|-----------|
|             |           |                                                                                      |           |
| 213702_x_at | ASAH1     | N-acylsphingosine<br>amidohydrolase (acid<br>ceramidase) 1                           | 1.7       |
| 213703_at   | LOC150759 | hypothetical protein<br>LOC150759                                                    | 1.68      |
| 213712_at   | ELOVL2    | elongation of very long chain<br>fatty acids (FEN1/Elo2,<br>SUR4/Elo3, yeast)-like 2 | 2.24      |
| 213713_s_at | LOC89944  | hypothetical protein BC008326                                                        | -<br>1.34 |
| 213716_s_at | SECTM1    | secreted and transmembrane 1                                                         | 1.5       |
| 213746_s_at | FLNA      | filamin A, alpha (actin binding<br>protein 280)                                      | 1.73      |
| 213796_at   | SPRR1A    | small proline-rich protein 1A                                                        | -<br>1.19 |
| 213813_x_at |           | NA                                                                                   | 1.77      |



|             |          |                                                 |           |
|-------------|----------|-------------------------------------------------|-----------|
| 213823_at   | HOXA11   | homeobox A11                                    | -<br>1.47 |
| 213828_x_at | H3F3A    | H3 histone, family 3A                           | 1.5       |
| 213840_s_at | MRPS12   | mitochondrial ribosomal<br>protein S12          | -<br>1.21 |
| 213846_at   | COX7C    | cytochrome c oxidase subunit<br>VIIc            | 1.78      |
| 213870_at   | COL11A2  | collagen, type XI, alpha 2                      | -1.4      |
| 213882_at   | TM2D1    | TM2 domain containing 1                         | 1.51      |
| 213888_s_at | TRAF3IP3 | TRAF3 interacting protein 3                     | 1.37      |
| 213894_at   | THSD7A   | thrombospondin, type I, domain<br>containing 7A | 2.01      |
| 213910_at   | IGFBP7   | insulin-like growth factor<br>binding protein 7 | 1.63      |

|             |          |                                                         |           |
|-------------|----------|---------------------------------------------------------|-----------|
| 213923_at   | RAP2B    | RAP2B, member of RAS<br>oncogene family                 | 1.78      |
| 213932_x_at | HLA-A    | major histocompatibility<br>complex, class I, A         | 1.8       |
| 213948_x_at | CADM3    | cell adhesion molecule 3                                | -<br>1.19 |
| 213952_s_at | ALOX5    | arachidonate 5-lipoxygenase                             | -<br>1.16 |
| 213969_x_at | RPL29    | ribosomal protein L29                                   | 1.35      |
| 213982_s_at | RABGAP1L | RAB GTPase activating protein<br>1-like                 | 1.73      |
| 213988_s_at | SAT1     | spermidine/spermine N1-<br>acetyltransferase 1          | 2.11      |
| 213991_s_at | HS3ST1   | heparan sulfate (glucosamine)<br>3-O-sulfotransferase 1 | -<br>1.23 |
| 213994_s_at | SPON1    | spondin 1, extracellular matrix<br>protein              | 2.62      |
| 214022_s_at | IFITM2   | interferon induced<br>transmembrane protein 2 (1-       | 2.68      |

|             |                   |                                                                                             |           |
|-------------|-------------------|---------------------------------------------------------------------------------------------|-----------|
|             |                   | 8D)                                                                                         |           |
| 214030_at   | DKFZp667G21<br>10 | hypothetical protein<br>DKFZp667G2110                                                       | 1.43      |
| 214066_x_at | NPR2              | natriuretic peptide receptor<br>B/guanylate cyclase B<br>(atriuretic peptide<br>receptor B) | -<br>1.18 |
| 214072_x_at | NENF              | neuron derived neurotrophic<br>factor                                                       | -<br>1.26 |
| 214085_x_at | KRR1              | KRR1, small subunit (SSU)<br>processome component,<br>homolog (yeast)                       | 3.26      |
| 214091_s_at | GPX3              | glutathione peroxidase 3<br>(plasma)                                                        | 1.66      |
| 214092_x_at | SFRS14            | splicing factor, arginine/serine-<br>rich 14                                                | 1.64      |

|             |         |                                                                                                |           |
|-------------|---------|------------------------------------------------------------------------------------------------|-----------|
| 214099_s_at | PDE4DIP | phosphodiesterase 4D<br>interacting protein<br>(myomegalin)                                    | -<br>1.32 |
| 214100_x_at | NSUN5B  | NOL1/NOP2/Sun domain<br>family, member 5B                                                      | 1.45      |
| 214132_at   | ATP5C1  | ATP synthase, H <sup>+</sup> transporting,<br>mitochondrial F1 complex,<br>gamma polypeptide 1 | 1.91      |
| 214176_s_at | PBXIP1  | pre-B-cell leukemia homeobox<br>interacting protein 1                                          | 1.49      |
| 214177_s_at | PBXIP1  | pre-B-cell leukemia homeobox<br>interacting protein 1                                          | 1.64      |
| 214182_at   | ARF6    | ADP-ribosylation factor 6                                                                      | 1.9       |

|             |         |                                                 |           |
|-------------|---------|-------------------------------------------------|-----------|
|             |         |                                                 |           |
| 214211_at   | FTH1    | ferritin, heavy polypeptide 1                   | 1.85      |
| 214215_s_at | LARP5   | La ribonucleoprotein domain<br>family, member 5 | -1.2      |
| 214256_at   | ATP10A  | ATPase, Class V, type 10A                       | -<br>1.32 |
| 214271_x_at | RPL12   | ribosomal protein L12                           | 1.46      |
| 214272_at   | CYLD    | cylindromatosis (turban tumor<br>syndrome)      | -<br>1.21 |
| 214279_s_at | NDRG2   | NDRG family member 2                            | 2.7       |
| 214280_x_at | HNRNPA1 | heterogeneous nuclear<br>ribonucleoprotein A1   | 1.74      |
| 214298_x_at | 6-Sep   | septin 6                                        | 1.73      |

|             |        |                                                                         |           |
|-------------|--------|-------------------------------------------------------------------------|-----------|
| 214305_s_at | SF3B1  | splicing factor 3b, subunit 1,<br>155kDa                                | 1.81      |
| 214317_x_at | RPS9   | ribosomal protein S9                                                    | 1.46      |
| 214322_at   | CAMK2G | calcium/calmodulin-dependent<br>protein kinase (CaM kinase) II<br>gamma | -<br>1.22 |
| 214358_at   | ACACA  | acetyl-Coenzyme A<br>carboxylase alpha                                  | -<br>1.59 |
| 214363_s_at | MATR3  | matrin 3                                                                | 1.35      |
| 214382_at   | UNC93A | unc-93 homolog A (C. elegans)                                           | 2.26      |
| 214390_s_at | BCAT1  | branched chain<br>aminotransferase 1, cytosolic                         | -<br>1.35 |
| 214405_at   | CUGBP2 | CUG triplet repeat, RNA<br>binding protein 2                            | 1.39      |
| 214407_x_at | GYPB   | glycophorin B (MNS blood<br>group)                                      | -<br>1.23 |
| 214411_x_at | CTRB1  | chymotrypsinogen B1                                                     | -         |

|             |        |                                                          |           |
|-------------|--------|----------------------------------------------------------|-----------|
|             |        |                                                          | 1.31      |
| 214414_x_at | HBA1   | hemoglobin, alpha 1                                      | 3.76      |
| 214419_s_at | CYP2C9 | cytochrome P450, family 2,<br>subfamily C, polypeptide 9 | 2.25      |
| 214420_s_at | CYP2C9 | cytochrome P450, family 2,<br>subfamily C, polypeptide 9 | 2.54      |
| 214423_x_at | ALDOB  | aldolase B, fructose-<br>bisphosphate                    | 1.56      |
| 214428_x_at | C4A    | complement component 4A<br>(Rodgers blood group)         | -<br>1.88 |
| 214453_s_at | IFI44  | interferon-induced protein 44                            | 4.86      |
| 214456_x_at | SAA2   | serum amyloid A2                                         | -<br>3.47 |
| 214459_x_at | HLA-C  | major histocompatibility<br>complex, class I, C          | 1.82      |

|             |         |                                                           |           |
|-------------|---------|-----------------------------------------------------------|-----------|
|             |         |                                                           |           |
| 214467_at   | GPR65   | G protein-coupled receptor 65                             | 1.77      |
| 214470_at   | KLRB1   | killer cell lectin-like receptor<br>subfamily B, member 1 | 3.77      |
| 214478_at   | SPP2    | secreted phosphoprotein 2,<br>24kDa                       | 4.12      |
| 214485_at   | ODF1    | outer dense fiber of sperm tails<br>1                     | -<br>1.49 |
| 214500_at   | H2AFY   | H2A histone family, member Y                              | 1.77      |
| 214505_s_at | FHL1    | four and a half LIM domains 1                             | 1.97      |
| 214512_s_at | SUB1    | SUB1 homolog ( <i>S. cerevisiae</i> )                     | 1.84      |
| 214513_s_at | CREB1   | cAMP responsive element<br>binding protein 1              | 1.47      |
| 214553_s_at | ARPP-19 | cyclic AMP phosphoprotein, 19<br>kD                       | 1.52      |



|             |          |                                                            |           |
|-------------|----------|------------------------------------------------------------|-----------|
| 214567_s_at | XCL2     | chemokine (C motif) ligand 2                               | 2.13      |
| 214577_at   | MAP1B    | microtubule-associated protein<br>1B                       | 1.27      |
| 214578_s_at | ROCK1    | Rho-associated, coiled-coil<br>containing protein kinase 1 | 1.44      |
| 214581_x_at | TNFRSF21 | tumor necrosis factor receptor<br>superfamily, member 21   | 1.85      |
| 214615_at   | P2RY10   | purinergic receptor P2Y, G-<br>protein coupled, 10         | 1.17      |
| 214616_at   | HIST1H3E | histone cluster 1, H3e                                     | -<br>1.36 |
| 214617_at   | PRF1     | perforin 1 (pore forming<br>protein)                       | 1.64      |
| 214625_s_at | MINK1    | misshapen-like kinase 1<br>(zebrafish)                     | -<br>1.29 |
| 214649_s_at | MTMR2    | myotubularin related protein 2                             | 1.42      |

|             |          |                                              |       |
|-------------|----------|----------------------------------------------|-------|
| 214683_s_at | CLK1     | CDC-like kinase 1                            | 2.2   |
| 214686_at   | ZNF266   | zinc finger protein 266                      | 2.11  |
| 214723_x_at | KIAA1641 | KIAA1641                                     | 1.83  |
| 214734_at   | EXPH5    | exophilin 5                                  | 2.26  |
| 214736_s_at | ADD1     | adducin 1 (alpha)                            | 1.62  |
| 214744_s_at | RPL23    | ribosomal protein L23                        | 1.31  |
| 214750_at   | PLAC4    | placenta-specific 4                          | 1.29  |
| 214752_x_at | FLNA     | filamin A, alpha (actin binding protein 280) | 1.84  |
| 214753_at   | PFAAP5   | phosphonoformate immuno-associated protein 5 | 1.8   |
| 214758_at   | WDR21A   | WD repeat domain 21A                         | 1.29  |
| 214768_x_at | IGKC     | immunoglobulin kappa constant                | 11.95 |

|             |         |                                                          |           |
|-------------|---------|----------------------------------------------------------|-----------|
| 214771_x_at | M-RIP   | myosin phosphatase-Rho<br>interacting protein            | 1.5       |
| 214777_at   |         | NA                                                       | 12.2<br>4 |
| 214790_at   | SENP6   | SUMO1/sentrin specific<br>peptidase 6                    | 1.48      |
| 214799_at   | NFASC   | neurofascin homolog (chicken)                            | 1.21      |
| 214807_at   |         | NA                                                       | 2.02      |
| 214812_s_at | MOBKL1B | MOB1, Mps One Binder kinase<br>activator-like 1B (yeast) | 1.45      |
| 214824_at   |         | NA                                                       | -<br>1.38 |
| 214835_s_at | SUCLG2  | succinate-CoA ligase, GDP-<br>forming, beta subunit      | -<br>1.79 |
| 214838_at   | SFT2D2  | SFT2 domain containing 2                                 | -<br>1.46 |
| 214840_at   | TOM1L2  | target of myb1-like 2 (chicken)                          | -<br>1.36 |
| 214848_at   |         | NA                                                       | 1.16      |

|             |           |                                                                   |           |
|-------------|-----------|-------------------------------------------------------------------|-----------|
| 214859_at   | FSTL4     | follistatin-like 4                                                | -<br>1.26 |
| 214865_at   | DOT1L     | DOT1-like, histone H3<br>methyltransferase (S.<br>cerevisiae)     | -<br>1.17 |
| 214870_x_at | LOC339047 | hypothetical protein<br>LOC339047                                 | 1.52      |
| 214879_x_at | USF2      | upstream transcription factor 2,<br>c-fos interacting             | -<br>1.39 |
| 214880_x_at | CALD1     | caldesmon 1                                                       | 1.83      |
| 214882_s_at | SFRS2     | splicing factor, arginine/serine-<br>rich 2                       | 1.56      |
| 214907_at   | CEACAM21  | carcinoembryonic antigen-<br>related cell adhesion molecule<br>21 | -<br>1.39 |
| 214916_x_at | IL8       | interleukin 8                                                     | 4.23      |

|             |           |                                                  |           |
|-------------|-----------|--------------------------------------------------|-----------|
|             |           |                                                  |           |
| 214920_at   | THSD7A    | thrombospondin, type I, domain containing 7A     | 2.49      |
| 214932_at   | KIDINS220 | kinase D-interacting substrate of 220 kDa        | -<br>1.18 |
| 214946_x_at | FAM21A    | family with sequence similarity 21, member A     | 1.65      |
| 214968_at   | DDX51     | DEAD (Asp-Glu-Ala-Asp) box polypeptide 51        | -<br>1.38 |
| 214969_at   | MAP3K9    | mitogen-activated protein kinase kinase kinase 9 | -<br>1.22 |

|             |          |                                                                                        |           |
|-------------|----------|----------------------------------------------------------------------------------------|-----------|
|             |          |                                                                                        |           |
| 214973_x_at | IGHD     | immunoglobulin heavy<br>constant delta                                                 | 3.82      |
| 215003_at   | DGCR9    | DiGeorge syndrome critical<br>region gene 9                                            | -<br>1.23 |
| 215034_s_at | TM4SF1   | transmembrane 4 L six family<br>member 1                                               | 4.95      |
| 215051_x_at | AIF1     | allograft inflammatory factor 1                                                        | 1.95      |
| 215062_at   | FMNL2    | formin-like 2                                                                          | 1.24      |
| 215076_s_at | COL3A1   | collagen, type III, alpha 1<br>(Ehlers-Danlos syndrome type<br>IV, autosomal dominant) | 3.21      |
| 215085_x_at | DLEC1    | deleted in lung and esophageal<br>cancer 1                                             | -<br>1.35 |
| 215123_at   | LOC23117 | KIAA0220-like protein                                                                  | 2.5       |
| 215137_at   | KIAA0508 | KIAA0508 protein                                                                       | -         |

|             |        |                                                                                    |           |
|-------------|--------|------------------------------------------------------------------------------------|-----------|
|             |        |                                                                                    | 1.28      |
| 215151_at   | DOCK10 | dedicator of cytokinesis 10                                                        | 1.17      |
| 215164_at   | TCF4   | transcription factor 4                                                             | 1.19      |
| 215213_at   | NUP54  | nucleoporin 54kDa                                                                  | -<br>1.13 |
| 215214_at   | IGL@   | immunoglobulin lambda locus                                                        | 3.1       |
| 215252_at   | DNAJC7 | DnaJ (Hsp40) homolog,<br>subfamily C, member 7                                     | 1.73      |
| 215260_s_at | TCF3   | transcription factor 3 (E2A<br>immunoglobulin enhancer<br>binding factors E12/E47) | -<br>1.29 |
| 215293_s_at | FRAG1  | FGF receptor activating protein<br>1                                               | -<br>1.37 |
| 215313_x_at | HLA-A  | major histocompatibility<br>complex, class I, A                                    | 2.07      |

|             |          |                                                      |      |
|-------------|----------|------------------------------------------------------|------|
| 215322_at   | LONRF1   | LON peptidase N-terminal<br>domain and ring finger 1 | 1.57 |
| 215332_s_at | CD8B     | CD8b molecule                                        | 1.17 |
| 215340_at   | ADCY1    | adenylate cyclase 1 (brain)                          | 1.32 |
| 215344_at   |          | NA                                                   | 1.15 |
| 215351_at   | RTCD1    | RNA terminal phosphate<br>cyclase domain 1           | 1.18 |
| 215364_s_at | KIAA0467 | KIAA0467                                             | 1.42 |
| 215417_at   | EXOC6B   | exocyst complex component 6B                         | 1.11 |
| 215421_at   |          | NA                                                   | 1.26 |
| 215424_s_at | SNW1     | SNW domain containing 1                              | 1.49 |
| 215433_at   | DPY19L1  | dpy-19-like 1 (C. elegans)                           | 1.23 |
| 215440_s_at | BEXL1    | brain expressed X-linked-like 1                      | 2.75 |
| 215446_s_at | LOX      | lysyl oxidase                                        | 1.49 |



|             |        |                                                                                       |           |
|-------------|--------|---------------------------------------------------------------------------------------|-----------|
| 215447_at   | TFPI   | tissue factor pathway inhibitor<br>(lipoprotein-associated<br>coagulation inhibitor)  | -3.3      |
| 215449_at   | BZRPL1 | benzodiazapine receptor<br>(peripheral)-like 1                                        | -<br>1.49 |
| 215476_at   |        | NA                                                                                    | -<br>1.26 |
| 215477_at   |        | NA                                                                                    | -<br>1.14 |
| 215484_at   | TRIM3  | tripartite motif-containing 3                                                         | -<br>1.56 |
| 215491_at   | MYCL1  | v-myc myelocytomatosis viral<br>oncogene homolog 1, lung<br>carcinoma derived (avian) | -<br>1.26 |
| 215493_x_at | BTN2A1 | butyrophilin, subfamily 2,<br>member A1                                               | 1.4       |
| 215511_at   | TCF20  | transcription factor 20 (AR1)                                                         | -<br>1.32 |

|             |          |                                      |      |
|-------------|----------|--------------------------------------|------|
|             |          |                                      | -    |
| 215515_at   | KIRREL   | kin of IRRE like (Drosophila)        | 1.41 |
|             |          |                                      | -    |
| 215541_s_at | DIAPH1   | diaphanous homolog 1<br>(Drosophila) | 1.42 |
|             |          |                                      | -    |
| 215568_x_at | LYPLA2   | lysophospholipase II                 | 1.39 |
|             |          |                                      | -    |
| 215590_x_at |          | NA                                   | 1.21 |
|             |          |                                      | -    |
| 215622_x_at | PHF7     | PHD finger protein 7                 | 1.34 |
|             |          |                                      | -    |
| 215626_at   | DOCK9    | dedicator of cytokinesis 9           | 1.2  |
|             |          |                                      | -    |
| 215644_at   | ZNF518   | zinc finger protein 518              | 1.21 |
| 215646_s_at | VCAN     | versican                             | 3.67 |
|             |          |                                      | -    |
| 215668_s_at | PLXNB1   | plexin B1                            | 1.37 |
|             |          |                                      | -    |
| 215681_at   | KIAA1654 | KIAA1654 protein                     | 1.22 |

|             |        |                                                                                                             |           |
|-------------|--------|-------------------------------------------------------------------------------------------------------------|-----------|
| 215690_x_at | GPAA1  | glycosylphosphatidylinositol<br>anchor attachment protein 1<br>homolog (yeast)                              | -<br>1.45 |
| 215702_s_at | CFTR   | cystic fibrosis transmembrane<br>conductance regulator (ATP-<br>binding cassette sub-family C,<br>member 7) | 1.66      |
| 215712_s_at | IGFALS | insulin-like growth factor<br>binding protein, acid labile<br>subunit                                       | -<br>1.76 |
| 215715_at   | SLC6A2 | solute carrier family 6<br>(neurotransmitter transporter,<br>noradrenalin), member 2                        | -<br>1.18 |

|             |         |                                                             |           |
|-------------|---------|-------------------------------------------------------------|-----------|
| 215719_x_at | FAS     | Fas (TNF receptor superfamily, member 6)                    | 2.59      |
| 215737_x_at | USF2    | upstream transcription factor 2, c-fos interacting          | -<br>1.59 |
| 215792_s_at | DNAJC11 | DnaJ (Hsp40) homolog, subfamily C, member 11                | -<br>1.41 |
| 215798_at   | ALDH1L1 | aldehyde dehydrogenase 1 family, member L1                  | -<br>1.42 |
| 215809_at   | CYP2D6  | cytochrome P450, family 2, subfamily D, polypeptide 6       | -<br>1.71 |
| 215819_s_at | RHCE    | Rh blood group, CcEe antigens                               | -<br>1.29 |
| 215824_at   | NUDT7   | nudix (nucleoside diphosphate linked moiety X)-type motif 7 | -<br>1.19 |
| 215865_at   | SYT12   | synaptotagmin XII                                           | -         |

|             |           |                                                                                            |           |
|-------------|-----------|--------------------------------------------------------------------------------------------|-----------|
|             |           |                                                                                            | 1.27      |
| 215870_s_at | PLA2G5    | phospholipase A2, group V                                                                  | 2.97      |
| 215906_at   |           | NA                                                                                         | -<br>1.37 |
| 215925_s_at | CD72      | CD72 molecule                                                                              | 1.51      |
| 215927_at   | ARFGEF2   | ADP-ribosylation factor<br>guanine nucleotide-exchange<br>factor 2 (brefeldin A-inhibited) | -<br>1.37 |
| 215948_x_at | ZMYM5     | zinc finger, MYM-type 5                                                                    | 1.17      |
| 215949_x_at | IGHM      | immunoglobulin heavy<br>constant mu                                                        | 2.07      |
| 215959_at   | PPFIBP2   | PTPRF interacting protein,<br>binding protein 2 (liprin beta 2)                            | -<br>1.22 |
| 215963_x_at | LOC642741 | similar to ribosomal protein L3<br>isoform a                                               | 1.36      |
| 215974_at   | HCG4P6    | HLA complex group 4<br>pseudogene 6                                                        | -<br>1.22 |

|             |         |                                                          |           |
|-------------|---------|----------------------------------------------------------|-----------|
| 215999_at   | CDRT1   | CMT1A duplicated region<br>transcript 1                  | -<br>1.23 |
| 216003_at   | CDRT1   | CMT1A duplicated region<br>transcript 1                  | -1.2      |
| 216011_at   | SLC39A9 | solute carrier family 39 (zinc<br>transporter), member 9 | -<br>1.47 |
| 216033_s_at | FYN     | FYN oncogene related to SRC,<br>FGR, YES                 | 2.67      |
| 216036_x_at | WDTC1   | WD and tetratricopeptide<br>repeats 1                    | -<br>1.49 |
| 216041_x_at | GRN     | granulin                                                 | 1.77      |
| 216054_x_at | MYL4    | myosin, light chain 4, alkali;<br>atrial, embryonic      | -<br>1.27 |
| 216060_s_at | DAAM1   | dishevelled associated activator<br>of morphogenesis 1   | 1.88      |

|             |         |                                                                                |           |
|-------------|---------|--------------------------------------------------------------------------------|-----------|
| 216092_s_at | SLC7A8  | solute carrier family 7 (cationic amino acid transporter, y+ system), member 8 | -<br>1.37 |
| 216102_at   | PHLDB1  | pleckstrin homology-like domain, family B, member 1                            | -<br>1.46 |
| 216126_at   |         | NA                                                                             | -1.4      |
| 216166_at   | RHOH    | ras homolog gene family, member H                                              | 1.17      |
| 216175_at   | POLD2   | polymerase (DNA directed), delta 2, regulatory subunit 50kDa                   | -<br>1.24 |
| 216186_at   | C1orf20 | chromosome 1 open reading frame 20                                             | -1.4      |
| 216192_at   | FABP7   | fatty acid binding protein 7, brain                                            | -<br>1.27 |
| 216204_at   | COMT    | catechol-O-methyltransferase                                                   | -<br>1.32 |

|             |           |                                                                   |           |
|-------------|-----------|-------------------------------------------------------------------|-----------|
| 216207_x_at | IGKV1D-13 | immunoglobulin kappa variable<br>1D-13                            | 11.4<br>2 |
| 216209_at   | LOC400084 | hypothetical gene supported by<br>AK057632; AL137270;<br>BC057846 | -<br>1.27 |
| 216210_x_at | TRIOBP    | TRIO and F-actin binding<br>protein                               | 1.49      |
| 216221_s_at | PUM2      | pumilio homolog 2<br>(Drosophila)                                 | 1.35      |
| 216233_at   | CD163     | CD163 molecule                                                    | 1.82      |
| 216238_s_at | FGB       | fibrinogen beta chain                                             | -<br>1.47 |
| 216252_x_at | FAS       | Fas (TNF receptor superfamily,<br>member 6)                       | 2.2       |
| 216271_x_at | SYDE1     | synapse defective 1, Rho<br>GTPase, homolog 1 (C.<br>elegans)     | -1.5      |



|             |           |                                                              |      |
|-------------|-----------|--------------------------------------------------------------|------|
| 216275_at   | BUB1      | BUB1 budding uninhibited by benzimidazoles 1 homolog (yeast) | -1.3 |
| 216303_s_at | MTMR1     | myotubularin related protein 1                               | 1.24 |
| 216309_x_at | JRK       | jerky homolog (mouse)                                        | 1.49 |
| 216323_x_at | TUBA3D    | tubulin, alpha 3d                                            | 1.52 |
| 216333_x_at | TNXB      | tenascin XB                                                  | 2.21 |
| 216355_at   | PCDHB17   | protocadherin beta 17 pseudogene                             | 1.37 |
| 216366_x_at |           | NA                                                           | 1.45 |
| 216382_s_at | TNRC21    | trinucleotide repeat containing 21                           | 1.46 |
| 216385_at   | LOC220077 | docking protein 1-like protein                               | 1.58 |
| 216412_x_at | IVD       | isovaleryl Coenzyme A                                        | 2.46 |

|             |         |                                                             |           |
|-------------|---------|-------------------------------------------------------------|-----------|
|             |         | dehydrogenase                                               |           |
| 216428_x_at | KIR3DX1 | killer cell immunoglobulin-like receptor, three domains, X1 | -<br>1.36 |
| 216430_x_at | IGL@    | immunoglobulin lambda locus                                 | 2.33      |
| 216437_at   | EPC1    | enhancer of polycomb homolog 1 (Drosophila)                 | -<br>1.17 |
| 216491_x_at | IGHM    | immunoglobulin heavy constant mu                            | 6.8       |
| 216500_at   |         | NA                                                          | -<br>1.33 |
| 216510_x_at | ZCWPW2  | zinc finger, CW type with PWWP domain 2                     | 5.73      |

|             |          |                                                                                       |           |
|-------------|----------|---------------------------------------------------------------------------------------|-----------|
|             |          |                                                                                       |           |
| 216512_s_at | DCT      | dopachrome tautomerase<br>(dopachrome delta-isomerase,<br>tyrosine-related protein 2) | -<br>1.17 |
| 216517_at   | IGKV1-5  | immunoglobulin kappa variable<br>1-5                                                  | 2.36      |
| 216526_x_at | HLA-C    | major histocompatibility<br>complex, class I, C                                       | 1.67      |
| 216530_at   |          | NA                                                                                    | -<br>1.22 |
| 216535_at   | CADM3    | cell adhesion molecule 3                                                              | -<br>1.91 |
| 216541_x_at | IGHV1-69 | immunoglobulin heavy variable<br>1-69                                                 | 1.72      |
| 216542_x_at | IGHA1    | immunoglobulin heavy<br>constant alpha 1                                              | 2.08      |

|             |           |                                                         |           |
|-------------|-----------|---------------------------------------------------------|-----------|
| 216547_at   | LOC127406 | similar to laminin receptor 1<br>(ribosomal protein SA) | -<br>1.67 |
| 216557_x_at | IFI6      | interferon, alpha-inducible<br>protein 6                | 3.82      |
| 216558_x_at |           | NA                                                      | 1.46      |
| 216560_x_at | IGL@      | immunoglobulin lambda locus                             | 5.06      |
| 216573_at   |           | NA                                                      | 1.43      |
| 216576_x_at | NTN2L     | netrin 2-like (chicken)                                 | 19.6<br>2 |
| 216579_at   | GJB4      | gap junction protein, beta 4                            | -<br>1.48 |

|             |           |                                                                                                                        |           |
|-------------|-----------|------------------------------------------------------------------------------------------------------------------------|-----------|
|             |           |                                                                                                                        | -         |
| 216582_at   |           | NA                                                                                                                     | 1.26      |
| 216594_x_at | AKR1C1    | aldo-keto reductase family 1, member C1 (dihydrodiol dehydrogenase 1; 20-alpha (3-alpha)-hydroxysteroid dehydrogenase) | -<br>1.97 |
| 216606_x_at | LYPLA2P1  | lysophospholipase II pseudogene 1                                                                                      | -<br>1.24 |
| 216621_at   | ROCK1     | Rho-associated, coiled-coil containing protein kinase 1                                                                | 1.23      |
| 216650_at   | LOC650303 | similar to 60S ribosomal protein L29 (Cell surface heparin binding protein HIP)                                        | -<br>1.43 |
| 216675_at   | C9orf106  | chromosome 9 open reading frame 106                                                                                    | -<br>1.42 |

|             |           |                                                                               |           |
|-------------|-----------|-------------------------------------------------------------------------------|-----------|
| 216678_at   | IFT122    | intraflagellar transport 122<br>homolog (Chlamydomonas)                       | -<br>1.62 |
| 216686_at   | FLJ40330  | similar to protein immuno-<br>reactive with anti-PTH<br>polyclonal antibodies | 1.11      |
| 216693_x_at | HDGFRP3   | hepatoma-derived growth<br>factor, related protein 3                          | 1.41      |
| 216698_x_at | OR7E47P   | olfactory receptor, family 7,<br>subfamily E, member 47<br>pseudogene         | -<br>1.93 |
| 216730_at   |           | NA                                                                            | -<br>1.42 |
| 216732_at   | LOC389768 | similar to potassium channel<br>tetramerisation domain<br>containing 1        | -<br>1.45 |
| 216738_at   | HRH1      | histamine receptor H1                                                         | -<br>1.28 |

|             |          |                                                                                   |      |
|-------------|----------|-----------------------------------------------------------------------------------|------|
| 216757_at   |          | NA                                                                                | -1.3 |
| 216763_at   | ANKRD15  | ankyrin repeat domain 15                                                          | 1.17 |
| 216774_at   |          | NA                                                                                | 1.32 |
| 216781_at   | KIAA1751 | KIAA1751                                                                          | 1.21 |
| 216800_at   |          | NA                                                                                | 1.28 |
| 216807_at   | KIAA1751 | KIAA1751                                                                          | -1.2 |
| 216815_at   |          | NA                                                                                | 1.16 |
| 216818_s_at | OR2J2    | olfactory receptor, family 2,<br>subfamily J, member 2                            | 1.19 |
| 216824_at   |          | NA                                                                                | 1.26 |
| 216832_at   | RUNX1T1  | runt-related transcription factor<br>1; translocated to, 1 (cyclin D-<br>related) | 1.46 |

|             |          |                                                                                                                |           |
|-------------|----------|----------------------------------------------------------------------------------------------------------------|-----------|
| 216833_x_at | GYPB     | glycophorin B (MNS blood group)                                                                                | -<br>1.22 |
| 216836_s_at | ERBB2    | v-erb-b2 erythroblastic leukemia viral oncogene homolog 2, neuro/glioblastoma derived oncogene homolog (avian) | 1.71      |
| 216840_s_at | LAMA2    | laminin, alpha 2 (merosin, congenital muscular dystrophy)                                                      | 3.92      |
| 216846_at   | IGL@     | immunoglobulin lambda locus                                                                                    | 1.33      |
| 216848_at   | KIAA1660 | KIAA1660 protein                                                                                               | -<br>1.36 |
| 216852_x_at | IGL@     | immunoglobulin lambda locus                                                                                    | -<br>1.27 |
| 216879_at   | HR44     | Hr44 antigen                                                                                                   | -<br>1.35 |



|             |         |                                                                                                         |           |
|-------------|---------|---------------------------------------------------------------------------------------------------------|-----------|
| 216905_s_at | ST14    | suppression of tumorigenicity<br>14 (colon carcinoma)                                                   | 1.78      |
| 216915_s_at | PTPN12  | protein tyrosine phosphatase,<br>non-receptor type 12                                                   | 1.63      |
| 216919_at   | TP53I11 | tumor protein p53 inducible<br>protein 11                                                               | -<br>1.28 |
| 216920_s_at | TARP    | TCR gamma alternate reading<br>frame protein                                                            | 1.86      |
| 216925_s_at | TAL1    | T-cell acute lymphocytic<br>leukemia 1                                                                  | -<br>1.35 |
| 216930_at   | TCF1    | transcription factor 1, hepatic;<br>LF-B1, hepatic nuclear factor<br>(HNF1), albumin proximal<br>factor | -<br>1.42 |
| 216943_at   |         | NA                                                                                                      | -<br>1.34 |

|             |          |                                                          |           |
|-------------|----------|----------------------------------------------------------|-----------|
| 216978_x_at | ACTL6B   | actin-like 6B                                            | -<br>1.11 |
| 216983_s_at | ZNF224   | zinc finger protein 224                                  | 1.39      |
| 216984_x_at | IGL@     | immunoglobulin lambda locus                              | 7.09      |
| 216992_s_at | GRM8     | glutamate receptor,<br>metabotropic 8                    | -<br>1.28 |
| 217018_at   |          | NA                                                       | -<br>1.26 |
| 217030_at   |          | NA                                                       | -<br>1.44 |
| 217039_x_at | IGHG1    | immunoglobulin heavy<br>constant gamma 1 (G1m<br>marker) | -<br>1.51 |
| 217045_x_at | NCR2     | natural cytotoxicity triggering<br>receptor 2            | -<br>1.49 |
| 217051_s_at | SS18     | synovial sarcoma translocation,<br>chromosome 18         | -<br>1.26 |
| 217084_at   | MAPKAPK5 | mitogen-activated protein                                | 1.18      |

|             |           |                                                       |           |
|-------------|-----------|-------------------------------------------------------|-----------|
|             |           | kinase-activated protein kinase<br>5                  |           |
| 217095_x_at | NCR1      | natural cytotoxicity triggering<br>receptor 1         | -<br>1.29 |
| 217096_at   | PCLO      | piccolo (presynaptic cytomatrix<br>protein)           | -<br>1.23 |
| 217134_at   | MTAP      | methylthioadenosine<br>phosphorylase                  | -<br>1.24 |
| 217144_at   | LOC648390 | similar to ubiquitin B precursor                      | -<br>2.15 |
| 217145_at   | IGKC      | immunoglobulin kappa<br>constant                      | 1.34      |
| 217147_s_at | TRAT1     | T cell receptor associated<br>transmembrane adaptor 1 | 2.16      |
| 217148_x_at | IGL@      | immunoglobulin lambda locus                           | 10.5<br>6 |
| 217152_at   |           | NA                                                    | 1.57      |
| 217157_x_at |           | NA                                                    | 6.46      |

|             |           |                                                                                                                  |           |
|-------------|-----------|------------------------------------------------------------------------------------------------------------------|-----------|
| 217158_at   | LOC728683 | similar to Prostaglandin E2<br>receptor, EP4 subtype<br>(Prostanoid EP4 receptor) (PGE<br>receptor, EP4 subtype) | -<br>1.38 |
| 217165_x_at | MT1F      | metallothionein 1F                                                                                               | -<br>1.71 |
| 217174_s_at | APC2      | adenomatosis polyposis coli 2                                                                                    | -<br>1.37 |
| 217175_at   | UGT2B15   | UDP glucuronosyltransferase 2<br>family, polypeptide B15                                                         | 1.29      |
| 217179_x_at | LOC96610  | hypothetical gene LOC96610                                                                                       | 5.34      |
| 217200_x_at | CYB561    | cytochrome b-561                                                                                                 | -<br>1.41 |
| 217211_at   | LOC390861 | similar to cytoplasmic beta-<br>actin                                                                            | -<br>1.76 |
| 217216_x_at | MLH3      | mutL homolog 3 (E. coli)                                                                                         | 1.26      |
| 217224_at   |           | NA                                                                                                               | -<br>1.21 |

|             |       |                                                          |      |
|-------------|-------|----------------------------------------------------------|------|
| 217227_x_at | IL8   | interleukin 8                                            | 5.4  |
| 217232_x_at | HBB   | hemoglobin, beta                                         | 6.65 |
| 217234_s_at | VIL2  | villin 2 (ezrin)                                         | 1.96 |
| 217235_x_at |       | NA                                                       | 4.06 |
| 217236_x_at | IGHG1 | immunoglobulin heavy<br>constant gamma 1 (G1m<br>marker) | 1.68 |
| 217239_x_at | CPVL  | carboxypeptidase, vitellogenic-<br>like                  | 1.74 |

|             |           |                                                    |           |
|-------------|-----------|----------------------------------------------------|-----------|
| 217249_x_at |           | NA                                                 | -<br>1.57 |
| 217258_x_at | IVD       | isovaleryl Coenzyme A<br>dehydrogenase             | 4.46      |
| 217275_at   | DGCR14    | DiGeorge syndrome critical<br>region gene 14       | -<br>1.33 |
| 217279_x_at | MMP14     | matrix metalloproteinase 14<br>(membrane-inserted) | -<br>1.37 |
| 217286_s_at | NDRG3     | NDRG family member 3                               | 1.6       |
| 217330_at   | DISC1     | disrupted in schizophrenia 1                       | -1.2      |
| 217346_at   | LOC128192 | similar to peptidylprolyl<br>isomerase A isoform 1 | -<br>1.24 |
| 217360_x_at | IGHA1     | immunoglobulin heavy<br>constant alpha 1           | 2.04      |

|             |           |                                                                                                                                  |           |
|-------------|-----------|----------------------------------------------------------------------------------------------------------------------------------|-----------|
| 217362_x_at | HLA-DRB6  | major histocompatibility complex, class II, DR beta 6 (pseudogene)                                                               | 2.14      |
| 217367_s_at | ZHX3      | zinc fingers and homeoboxes 3                                                                                                    | -<br>1.48 |
| 217370_x_at | FUS       | fusion (involved in t(12;16) in malignant liposarcoma)                                                                           | 1.39      |
| 217376_at   | LOC441938 | similar to Signal-regulatory protein gamma precursor (Signal-regulatory protein beta-2) (SIRP-beta-2) (SIRP-b2) (CD172g antigen) | -<br>1.46 |
| 217378_x_at |           | NA                                                                                                                               | 12.8<br>9 |
| 217384_x_at | IL8       | interleukin 8                                                                                                                    | 1.58      |

|             |           |                                                           |      |
|-------------|-----------|-----------------------------------------------------------|------|
|             |           |                                                           |      |
| 217395_at   | MT4       | metallothionein 4                                         | 1.54 |
| 217399_s_at | FOXO3     | forkhead box O3                                           | 1.34 |
| 217408_at   | MRPS18B   | mitochondrial ribosomal<br>protein S18B                   | 1.84 |
| 217414_x_at | HBA1      | hemoglobin, alpha 1                                       | 5.26 |
| 217430_x_at | COL1A1    | collagen, type I, alpha 1                                 | 1.45 |
| 217434_at   | MC2R      | melanocortin 2 receptor<br>(adrenocorticotrophic hormone) | 1.11 |
| 217436_x_at | LOC730399 | hypothetical protein<br>LOC730399                         | 2.04 |
| 217437_s_at | TACC1     | transforming, acidic coiled-coil<br>containing protein 1  | 1.73 |



|             |          |                                                                                                |           |
|-------------|----------|------------------------------------------------------------------------------------------------|-----------|
| 217442_at   | CADM3    | cell adhesion molecule 3                                                                       | -<br>1.54 |
| 217457_s_at | RAP1GDS1 | RAP1, GTP-GDP dissociation<br>stimulator 1                                                     | -1.5      |
| 217480_x_at | HLA-C    | major histocompatibility<br>complex, class I, C                                                | 7.08      |
| 217492_s_at | PTENP1   | phosphatase and tensin<br>homolog (mutated in multiple<br>advanced cancers 1),<br>pseudogene 1 | 1.62      |
| 217493_x_at | NCR2     | natural cytotoxicity triggering<br>receptor 2                                                  | -<br>1.44 |
| 217525_at   | OLFML1   | olfactomedin-like 1                                                                            | 2.03      |
| 217546_at   | MT1M     | metallothionein 1M                                                                             | -<br>3.45 |
| 217589_at   | RAB40A   | RAB40A, member RAS                                                                             | -         |

|             |        |                                                             |           |
|-------------|--------|-------------------------------------------------------------|-----------|
|             |        | oncogene family                                             | 1.24      |
| 217633_at   | URB1   | URB1 ribosome biogenesis 1 homolog ( <i>S. cerevisiae</i> ) | -<br>1.21 |
| 217636_at   | POLG   | polymerase (DNA directed), gamma                            | -<br>1.21 |
| 217646_at   | SURF1  | surfeit 1                                                   | -1.3      |
| 217673_x_at | GNAS   | GNAS complex locus                                          | 1.33      |
| 217676_at   |        | NA                                                          | -<br>1.26 |
| 217686_at   | PTPN1  | protein tyrosine phosphatase, non-receptor type 1           | -<br>1.22 |
| 217687_at   | ADCY2  | adenylate cyclase 2 (brain)                                 | -<br>1.28 |
| 217741_s_at | ZFAND5 | zinc finger, AN1-type domain 5                              | 3.24      |
| 217751_at   | GSTK1  | glutathione S-transferase kappa 1                           | 1.65      |
| 217767_at   | C3     | complement component 3                                      | -<br>1.26 |

|             |          |                                                        |           |
|-------------|----------|--------------------------------------------------------|-----------|
| 217771_at   | GOLM1    | golgi membrane protein 1                               | 3.52      |
| 217776_at   | RDH11    | retinol dehydrogenase 11 (all-trans/9-cis/11-cis)      | -<br>1.82 |
| 217780_at   | C19orf56 | chromosome 19 open reading frame 56                    | 1.34      |
| 217789_at   | SNX6     | sorting nexin 6                                        | 1.33      |
| 217798_at   | CNOT2    | CCR4-NOT transcription complex, subunit 2              | 1.39      |
| 217806_s_at | POLDIP2  | polymerase (DNA-directed), delta interacting protein 2 | -<br>1.61 |
| 217807_s_at | GLTSCR2  | glioma tumor suppressor candidate region gene 2        | 2.05      |
| 217818_s_at | ARPC4    | actin related protein 2/3 complex, subunit 4, 20kDa    | -<br>1.58 |

|             |          |                                                          |           |
|-------------|----------|----------------------------------------------------------|-----------|
|             |          | ubiquitin-conjugating enzyme                             | -         |
| 217824_at   | UBE2J1   | E2, J1 (UBC6 homolog, yeast)                             | 1.56      |
| 217836_s_at | YY1AP1   | YY1 associated protein 1                                 | 1.45      |
| 217852_s_at | ARL8B    | ADP-ribosylation factor-like<br>8B                       | 1.42      |
| 217867_x_at | BACE2    | beta-site APP-cleaving enzyme<br>2                       | 3.16      |
| 217868_s_at | METTL9   | methyltransferase like 9                                 | 2.11      |
| 217872_at   | PIH1D1   | PIH1 domain containing 1                                 | -<br>1.36 |
| 217886_at   | EPS15    | epidermal growth factor<br>receptor pathway substrate 15 | 1.7       |
| 217889_s_at | CYBRD1   | cytochrome b reductase 1                                 | 1.81      |
| 217890_s_at | PARVA    | parvin, alpha                                            | 1.73      |
| 217892_s_at | LIMA1    | LIM domain and actin binding<br>1                        | 1.99      |
| 217899_at   | FLJ20254 | hypothetical protein FLJ20254                            | -<br>1.42 |

|             |          |                                                  |           |
|-------------|----------|--------------------------------------------------|-----------|
| 217904_s_at | BACE1    | beta-site APP-cleaving enzyme<br>1               | -<br>1.54 |
| 217908_s_at | IQWD1    | IQ motif and WD repeats 1                        | -<br>1.59 |
| 217917_s_at | DYNLRB1  | dynein, light chain, roadblock-<br>type 1        | 2.08      |
| 217918_at   | DYNLRB1  | dynein, light chain, roadblock-<br>type 1        | 1.79      |
| 217925_s_at | C6orf106 | chromosome 6 open reading<br>frame 106           | -<br>1.52 |
| 217965_s_at | SAP30BP  | SAP30 binding protein                            | 1.55      |
| 217967_s_at | FAM129A  | family with sequence similarity<br>129, member A | 3.49      |
| 217975_at   | WBP5     | WW domain binding protein 5                      | 2.65      |
| 217983_s_at | RNASET2  | ribonuclease T2                                  | 3.93      |
| 217988_at   | CCNB1IP1 | cyclin B1 interacting protein 1                  | 2.36      |
| 217990_at   | GMPR2    | guanosine monophosphate<br>reductase 2           | 1.49      |

|             |           |                                                                      |           |
|-------------|-----------|----------------------------------------------------------------------|-----------|
| 217993_s_at | MAT2B     | methionine adenosyltransferase<br>II, beta                           | 1.5       |
| 218010_x_at | C20orf149 | chromosome 20 open reading<br>frame 149                              | 1.54      |
| 218032_at   | SNN       | stannin                                                              | 1.68      |
| 218060_s_at | C16orf57  | chromosome 16 open reading<br>frame 57                               | -<br>1.45 |
| 218065_s_at | TMEM9B    | TMEM9 domain family,<br>member B                                     | 1.38      |
| 218067_s_at | FLJ10154  | hypothetical protein FLJ10154                                        | 2.05      |
| 218084_x_at | FXYD5     | FXYD domain containing ion<br>transport regulator 5                  | 2.09      |
| 218094_s_at | DBNDD2    | dysbindin (dystrobrevin<br>binding protein 1) domain<br>containing 2 | 1.74      |
| 218100_s_at | IFT57     | intraflagellar transport 57<br>homolog (Chlamydomonas)               | 2.41      |

|             |          |                                                                                                  |           |
|-------------|----------|--------------------------------------------------------------------------------------------------|-----------|
| 218128_at   | NFYB     | nuclear transcription factor Y,<br>beta                                                          | 1.64      |
| 218157_x_at | CDC42SE1 | CDC42 small effector 1                                                                           | 1.84      |
| 218165_at   | C1orf149 | chromosome 1 open reading<br>frame 149                                                           | 1.79      |
| 218186_at   | RAB25    | RAB25, member RAS<br>oncogene family                                                             | 1.94      |
| 218190_s_at | UCRC     | ubiquinol-cytochrome c<br>reductase complex (7.2 kD)                                             | 1.35      |
| 218192_at   | IHPK2    | inositol hexaphosphate kinase 2                                                                  | 1.54      |
| 218198_at   | DHX32    | DEAH (Asp-Glu-Ala-His) box<br>polypeptide 32                                                     | -<br>1.32 |
| 218217_at   | SCPEP1   | serine carboxypeptidase 1                                                                        | 1.53      |
| 218218_at   | APPL2    | adaptor protein,<br>phosphotyrosine interaction,<br>PH domain and leucine zipper<br>containing 2 | 1.49      |

|             |         |                                                                                         |           |
|-------------|---------|-----------------------------------------------------------------------------------------|-----------|
| 218222_x_at | ARNT    | aryl hydrocarbon receptor<br>nuclear translocator                                       | -<br>1.38 |
| 218223_s_at | PLEKHO1 | pleckstrin homology domain<br>containing, family O member 1                             | 1.44      |
| 218231_at   | NAGK    | N-acetylglucosamine kinase                                                              | 1.35      |
| 218258_at   | POLR1D  | polymerase (RNA) I<br>polypeptide D, 16kDa                                              | 1.98      |
| 218262_at   | RMND5B  | required for meiotic nuclear<br>division 5 homolog B ( <i>S.</i><br><i>cerevisiae</i> ) | -<br>1.39 |
| 218263_s_at | ZBED5   | zinc finger, BED-type<br>containing 5                                                   | 2.11      |



|             |           |                                                                                                 |           |
|-------------|-----------|-------------------------------------------------------------------------------------------------|-----------|
| 218275_at   | SLC25A10  | solute carrier family 25<br>(mitochondrial carrier;<br>dicarboxylate transporter),<br>member 10 | -<br>1.59 |
| 218277_s_at | DHX40     | DEAH (Asp-Glu-Ala-His) box<br>polypeptide 40                                                    | 1.73      |
| 218298_s_at | C14orf159 | chromosome 14 open reading<br>frame 159                                                         | 2.23      |
| 218305_at   | IPO4      | importin 4                                                                                      | -<br>1.53 |
| 218307_at   | RSAD1     | radical S-adenosyl methionine<br>domain containing 1                                            | -1.5      |
| 218312_s_at | ZSCAN18   | zinc finger and SCAN domain<br>containing 18                                                    | 1.89      |
| 218344_s_at | RCOR3     | REST corepressor 3                                                                              | 1.7       |
| 218346_s_at | SESN1     | sestrin 1                                                                                       | 2.07      |
| 218350_s_at | GMNN      | geminin, DNA replication<br>inhibitor                                                           | 3.46      |

|             |           |                                                                                  |           |
|-------------|-----------|----------------------------------------------------------------------------------|-----------|
| 218353_at   | RGS5      | regulator of G-protein signaling<br>5                                            | 2.02      |
| 218368_s_at | TNFRSF12A | tumor necrosis factor receptor<br>superfamily, member 12A                        | 2.27      |
| 218370_s_at | S100BP    | S100P binding protein                                                            | 1.58      |
| 218376_s_at | MICAL1    | microtubule associated<br>monooxygenase, calponin and<br>LIM domain containing 1 | 1.49      |
| 218378_s_at | PRKRIP1   | PRKR interacting protein 1<br>(IL11 inducible)                                   | 1.43      |
| 218380_at   | NLRP1     | NLR family, pyrin domain<br>containing 1                                         | 1.31      |
| 218392_x_at | SFXN1     | sideroflexin 1                                                                   | -<br>1.71 |
| 218399_s_at | CDCA4     | cell division cycle associated 4                                                 | -<br>1.25 |

|             |           |                                                                        |           |
|-------------|-----------|------------------------------------------------------------------------|-----------|
| 218424_s_at | STEAP3    | STEAP family member 3                                                  | -<br>2.13 |
| 218467_at   | TNFSF5IP1 | tumor necrosis factor<br>superfamily, member 5-induced<br>protein 1    | 1.57      |
| 218471_s_at | BBS1      | Bardet-Biedl syndrome 1                                                | 1.43      |
| 218501_at   | ARHGEF3   | Rho guanine nucleotide<br>exchange factor (GEF) 3                      | 2.48      |
| 218502_s_at | TRPS1     | trichorhinophalangeal<br>syndrome I                                    | 1.71      |
| 218539_at   | FBXO34    | F-box protein 34                                                       | 1.36      |
| 218546_at   | C1orf115  | chromosome 1 open reading<br>frame 115                                 | -<br>1.68 |
| 218559_s_at | MAFB      | v-maf musculoaponeurotic<br>fibrosarcoma oncogene<br>homolog B (avian) | 3.2       |

|             |         |                                                         |           |
|-------------|---------|---------------------------------------------------------|-----------|
| 218574_s_at | LMCD1   | LIM and cysteine-rich domains<br>1                      | 1.65      |
| 218576_s_at | DUSP12  | dual specificity phosphatase 12                         | 1.44      |
| 218589_at   | P2RY5   | purinergic receptor P2Y, G-<br>protein coupled, 5       | 2.97      |
| 218606_at   | ZDHHC7  | zinc finger, DHHC-type<br>containing 7                  | 1.43      |
| 218611_at   | IER5    | immediate early response 5                              | 2.6       |
| 218612_s_at | TSSC4   | tumor suppressing<br>subtransferable candidate 4        | -<br>1.29 |
| 218619_s_at | SUV39H1 | suppressor of variegation 3-9<br>homolog 1 (Drosophila) | -<br>1.44 |
| 218630_at   | MKS1    | Meckel syndrome, type 1                                 | -<br>1.27 |
| 218639_s_at | ZXDC    | ZXD family zinc finger C                                | -<br>1.35 |

|             |         |                                                                       |           |
|-------------|---------|-----------------------------------------------------------------------|-----------|
| 218686_s_at | RHBDF1  | rhomboid 5 homolog 1<br>(Drosophila)                                  | 1.68      |
| 218687_s_at | MUC13   | mucin 13, cell surface<br>associated                                  | 2.55      |
| 218694_at   | ARMCX1  | armadillo repeat containing, X-<br>linked 1                           | 2.26      |
| 218711_s_at | SDPR    | serum deprivation response<br>(phosphatidylserine binding<br>protein) | 2.53      |
| 218718_at   | PDGFC   | platelet derived growth factor C                                      | 1.97      |
| 218729_at   | LXN     | latexin                                                               | 5.11      |
| 218744_s_at | PACSIN3 | protein kinase C and casein<br>kinase substrate in neurons 3          | -<br>1.65 |
| 218746_at   | TAPBPL  | TAP binding protein-like                                              | 1.8       |
| 218764_at   | PRKCH   | protein kinase C, eta                                                 | 3         |
| 218776_s_at | TMEM62  | transmembrane protein 62                                              | -<br>1.26 |

|             |          |                                                                    |           |
|-------------|----------|--------------------------------------------------------------------|-----------|
| 218802_at   | CCDC109B | coiled-coil domain containing<br>109B                              | 1.93      |
| 218811_at   | ORAI2    | ORAI calcium release-activated<br>calcium modulator 2              | -<br>1.33 |
| 218837_s_at | UBE2D4   | ubiquitin-conjugating enzyme<br>E2D 4 (putative)                   | -<br>1.42 |
| 218858_at   | DEPDC6   | DEP domain containing 6                                            | 1.86      |
| 218860_at   | NOC4L    | nucleolar complex associated 4<br>homolog ( <i>S. cerevisiae</i> ) | -<br>1.39 |
| 218862_at   | ASB13    | ankyrin repeat and SOCS box-<br>containing 13                      | -<br>2.35 |
| 218867_s_at | C12orf49 | chromosome 12 open reading<br>frame 49                             | -<br>1.58 |

|             |          |                                                                                                  |           |
|-------------|----------|--------------------------------------------------------------------------------------------------|-----------|
| 218885_s_at | GALNT12  | UDP-N-acetyl-alpha-D-galactosamine:polypeptide N-acetylgalactosaminyltransferase 12 (GalNAc-T12) | 1.21      |
| 218891_at   | C10orf76 | chromosome 10 open reading frame 76                                                              | -<br>1.45 |
| 218895_at   | GPATCH3  | G patch domain containing 3                                                                      | -<br>1.35 |
| 218943_s_at | DDX58    | DEAD (Asp-Glu-Ala-Asp) box polypeptide 58                                                        | 1.57      |
| 218986_s_at | FLJ20035 | hypothetical protein FLJ20035                                                                    | 3.9       |
| 218991_at   | HEATR6   | HEAT repeat containing 6                                                                         | 1.23      |
| 218995_s_at | EDN1     | endothelin 1                                                                                     | 1.74      |
| 218999_at   | TMEM140  | transmembrane protein 140                                                                        | 1.96      |

|             |          |                                                            |           |
|-------------|----------|------------------------------------------------------------|-----------|
| 219018_s_at | C14orf65 | chromosome 14 open reading<br>frame 65                     | -<br>1.26 |
| 219033_at   | PARP8    | poly (ADP-ribose) polymerase<br>family, member 8           | 2.51      |
| 219035_s_at | RNF34    | ring finger protein 34                                     | 1.73      |
| 219049_at   | ChGn     | chondroitin beta1,4 N-<br>acetylgalactosaminyltransferase  | 2.76      |
| 219073_s_at | OSBPL10  | oxysterol binding protein-like<br>10                       | 1.87      |
| 219093_at   | PID1     | phosphotyrosine interaction<br>domain containing 1         | -<br>2.94 |
| 219101_x_at | ABHD8    | abhydrolase domain containing<br>8                         | -<br>1.42 |
| 219103_at   | DDEFL1   | development and differentiation<br>enhancing factor-like 1 | -<br>1.36 |
| 219115_s_at | IL20RA   | interleukin 20 receptor, alpha                             | 1.27      |



|             |        |                                                                |           |
|-------------|--------|----------------------------------------------------------------|-----------|
| 219161_s_at | CKLF   | chemokine-like factor                                          | 1.84      |
| 219170_at   | FSD1   | fibronectin type III and SPRY domain containing 1              | -<br>1.53 |
| 219179_at   | DACT1  | dapper, antagonist of beta-catenin, homolog 1 (Xenopus laevis) | 2.05      |
| 219180_s_at | PEX26  | peroxisome biogenesis factor 26                                | -<br>1.41 |
| 219187_at   | FKBPL  | FK506 binding protein like                                     | -1.5      |
| 219192_at   | UBAP2  | ubiquitin associated protein 2                                 | 1.84      |
| 219209_at   | IFIH1  | interferon induced with helicase C domain 1                    | 2.25      |
| 219223_at   | C9orf7 | chromosome 9 open reading frame 7                              | -<br>1.42 |
| 219228_at   | ZNF331 | zinc finger protein 331                                        | 4.11      |

|             |          |                                                                        |           |
|-------------|----------|------------------------------------------------------------------------|-----------|
| 219229_at   | SLCO3A1  | solute carrier organic anion<br>transporter family, member<br>3A1      | 1.39      |
| 219230_at   | TMEM100  | transmembrane protein 100                                              | 2.89      |
| 219243_at   | GIMAP4   | GTPase, IMAP family member<br>4                                        | 1.84      |
| 219245_s_at | OGFOD2   | 2-oxoglutarate and iron-<br>dependent oxygenase domain<br>containing 2 | -<br>1.43 |
| 219276_x_at | C9orf82  | chromosome 9 open reading<br>frame 82                                  | -<br>1.63 |
| 219279_at   | DOCK10   | dedicator of cytokinesis 10                                            | 1.73      |
| 219315_s_at | C16orf30 | chromosome 16 open reading<br>frame 30                                 | 2.46      |
| 219318_x_at | MED31    | mediator complex subunit 31                                            | -<br>1.35 |

|             |          |                                                        |           |
|-------------|----------|--------------------------------------------------------|-----------|
| 219320_at   | MYOHD1   | myosin head domain containing<br>1                     | -<br>1.34 |
| 219329_s_at | C2orf28  | chromosome 2 open reading<br>frame 28                  | 1.5       |
| 219332_at   | MICALL2  | MICAL-like 2                                           | 1.55      |
| 219352_at   | HERC6    | hect domain and RLD 6                                  | 2.18      |
| 219371_s_at | KLF2     | Kruppel-like factor 2 (lung)                           | 2.01      |
| 219372_at   | IFT81    | intraflagellar transport 81<br>homolog (Chlamydomonas) | 1.45      |
| 219407_s_at | LAMC3    | laminin, gamma 3                                       | 2.19      |
| 219419_at   | C18orf22 | chromosome 18 open reading<br>frame 22                 | -1.4      |
| 219440_at   | RAI2     | retinoic acid induced 2                                | 2.17      |
| 219441_s_at | LRRK1    | leucine-rich repeat kinase 1                           | 1.25      |
| 219469_at   | DYNC2H1  | dynein, cytoplasmic 2, heavy<br>chain 1                | 1.35      |

|             |         |                                                                          |           |
|-------------|---------|--------------------------------------------------------------------------|-----------|
| 219486_at   | DUS2L   | dihydrouridine synthase 2-like,<br>SMM1 homolog ( <i>S. cerevisiae</i> ) | -<br>1.48 |
| 219505_at   | CECR1   | cat eye syndrome chromosome<br>region, candidate 1                       | 3.76      |
| 219506_at   | C1orf54 | chromosome 1 open reading<br>frame 54                                    | 1.73      |
| 219527_at   | MOSC2   | MOCO sulphurase C-terminal<br>domain containing 2                        | -<br>1.63 |
| 219528_s_at | BCL11B  | B-cell CLL/lymphoma 11B<br>(zinc finger protein)                         | 1.62      |
| 219534_x_at | CDKN1C  | cyclin-dependent kinase<br>inhibitor 1C (p57, Kip2)                      | 1.81      |
| 219540_at   | ZNF267  | zinc finger protein 267                                                  | 1.79      |
| 219552_at   | SVEP1   | sushi, von Willebrand factor<br>type A, EGF and pentraxin                | 1.3       |

|             |           |                                                                                                |           |
|-------------|-----------|------------------------------------------------------------------------------------------------|-----------|
|             |           | domain containing 1                                                                            |           |
| 219573_at   | LRRC16    | leucine rich repeat containing<br>16                                                           | 1.62      |
| 219599_at   |           | NA                                                                                             | 2.52      |
| 219605_at   | ZNF3      | zinc finger protein 3                                                                          | -1.3      |
| 219611_s_at | CCDC21    | coiled-coil domain containing<br>21                                                            | -<br>1.35 |
| 219613_s_at | SIRT6     | sirtuin (silent mating type<br>information regulation 2<br>homolog) 6 ( <i>S. cerevisiae</i> ) | -<br>1.55 |
| 219679_s_at | WAC       | WW domain containing adaptor<br>with coiled-coil                                               | 2.07      |
| 219681_s_at | RAB11FIP1 | RAB11 family interacting<br>protein 1 (class I)                                                | 1.87      |

|             |          |                                                    |           |
|-------------|----------|----------------------------------------------------|-----------|
| 219684_at   | RTP4     | receptor (chemosensory)<br>transporter protein 4   | 1.97      |
| 219691_at   | SAMD9    | sterile alpha motif domain<br>containing 9         | 1.41      |
| 219694_at   | FAM105A  | family with sequence similarity<br>105, member A   | 1.53      |
| 219709_x_at | C16orf24 | chromosome 16 open reading<br>frame 24             | -<br>1.44 |
| 219712_s_at | CARKL    | carbohydrate kinase-like                           | -1.5      |
| 219723_x_at | AGPAT3   | 1-acylglycerol-3-phosphate O-<br>acyltransferase 3 | -<br>1.43 |
| 219738_s_at | PCDH9    | protocadherin 9                                    | 1.27      |
| 219767_s_at | CRYZL1   | crystallin, zeta (quinone<br>reductase)-like 1     | 2.24      |
| 219769_at   | INCENP   | inner centromere protein<br>antigens 135/155kDa    | -<br>1.24 |

|           |         |                                                                    |           |
|-----------|---------|--------------------------------------------------------------------|-----------|
| 219778_at | ZFPM2   | zinc finger protein, multitype 2                                   | 2.76      |
| 219783_at | C2orf18 | chromosome 2 open reading<br>frame 18                              | -<br>1.31 |
| 219801_at | ZNF34   | zinc finger protein 34                                             | 1.24      |
| 219809_at | WDR55   | WD repeat domain 55                                                | -<br>1.44 |
| 219812_at | PVRIG   | poliovirus receptor related<br>immunoglobulin domain<br>containing | 1.27      |
| 219828_at | C9orf86 | chromosome 9 open reading<br>frame 86                              | -<br>1.46 |
| 219847_at | HDAC11  | histone deacetylase 11                                             | -<br>1.47 |
| 219860_at | LY6G5C  | lymphocyte antigen 6 complex,<br>locus G5C                         | -<br>1.18 |
| 219863_at | HERC5   | hect domain and RLD 5                                              | 2.47      |
| 219865_at | HSPC157 | HSPC157 protein                                                    | -<br>1.55 |

|             |          |                                                      |           |
|-------------|----------|------------------------------------------------------|-----------|
| 219871_at   | FLJ13197 | hypothetical FLJ13197                                | 1.42      |
| 219877_at   | ZMAT4    | zinc finger, matrin type 4                           | -1.2      |
| 219885_at   | SLFN12   | schlafen family member 12                            | 1.38      |
| 219924_s_at | ZMYM6    | zinc finger, MYM-type 6                              | 1.38      |
| 219999_at   | MAN2A2   | mannosidase, alpha, class 2A,<br>member 2            | -<br>1.49 |
| 220009_at   | LONRF3   | LON peptidase N-terminal<br>domain and ring finger 3 | -<br>1.76 |
| 220014_at   | PRR16    | proline rich 16                                      | 1.45      |
| 220015_at   | CASZ1    | castor zinc finger 1                                 | -<br>1.48 |



|             |          |                                                                                     |           |
|-------------|----------|-------------------------------------------------------------------------------------|-----------|
| 220020_at   | XPNPEP3  | X-prolyl aminopeptidase<br>(aminopeptidase P) 3, putative                           | -<br>1.47 |
| 220038_at   | SGK3     | serum/glucocorticoid regulated<br>kinase family, member 3                           | -<br>2.17 |
| 220046_s_at | CCNL1    | cyclin L1                                                                           | 2.06      |
| 220048_at   | EDAR     | ectodysplasin A receptor                                                            | -<br>1.22 |
| 220053_at   | GDF3     | growth differentiation factor 3                                                     | -<br>1.23 |
| 220073_s_at | PLEKHG6  | pleckstrin homology domain<br>containing, family G (with<br>RhoGef domain) member 6 | -<br>1.29 |
| 220082_at   | PPP1R14D | protein phosphatase 1,<br>regulatory (inhibitor) subunit<br>14D                     | -<br>1.33 |
| 220088_at   | C5AR1    | complement component 5a<br>receptor 1                                               | 3         |

|             |        |                                                                                                    |           |
|-------------|--------|----------------------------------------------------------------------------------------------------|-----------|
| 220105_at   | RTDR1  | rhabdoid tumor deletion region<br>gene 1                                                           | -<br>1.18 |
| 220106_at   | NPC1L1 | NPC1 (Niemann-Pick disease,<br>type C1, gene)-like 1                                               | -<br>1.98 |
| 220116_at   | KCNN2  | potassium intermediate/small<br>conductance calcium-activated<br>channel, subfamily N, member<br>2 | -3.1      |
| 220132_s_at | CLEC2D | C-type lectin domain family 2,<br>member D                                                         | 1.3       |
| 220138_at   | HAND1  | heart and neural crest<br>derivatives expressed 1                                                  | -1.4      |
| 220147_s_at | FAM60A | family with sequence similarity<br>60, member A                                                    | 2.19      |
| 220156_at   | EFCAB1 | EF-hand calcium binding<br>domain 1                                                                | -<br>1.27 |

|             |         |                                                          |           |
|-------------|---------|----------------------------------------------------------|-----------|
| 220158_at   | LGALS14 | lectin, galactoside-binding,<br>soluble, 14              | -<br>1.15 |
| 220160_s_at | KPTN    | kaptin (actin binding protein)                           | -<br>1.28 |
| 220167_s_at | TP53TG3 | TP53TG3 protein                                          | -<br>1.27 |
| 220177_s_at | TMPRSS3 | transmembrane protease, serine<br>3                      | -<br>1.99 |
| 220201_at   | RC3H2   | ring finger and CCCH-type<br>zinc finger domains 2       | -<br>-1.5 |
| 220203_at   | BMP8A   | bone morphogenetic protein 8a                            | -<br>1.41 |
| 220230_s_at | CYB5R2  | cytochrome b5 reductase 2                                | -<br>1.39 |
| 220236_at   | PDPR    | pyruvate dehydrogenase<br>phosphatase regulatory subunit | -<br>-1.2 |
| 220245_at   | SLC45A2 | solute carrier family 45,<br>member 2                    | -<br>1.36 |

|             |           |                                                                   |           |
|-------------|-----------|-------------------------------------------------------------------|-----------|
| 220262_s_at | DLK2      | delta-like 2 homolog<br>(Drosophila)                              | -1.4      |
| 220274_at   | IQCA      | IQ motif containing with AAA<br>domain                            | -<br>1.18 |
| 220278_at   | JMJD2D    | jumonji domain containing 2D                                      | -<br>1.12 |
| 220283_at   | KIAA1822L | KIAA1822-like                                                     | -<br>1.35 |
| 220291_at   | GDPD2     | glycerophosphodiester<br>phosphodiesterase domain<br>containing 2 | -1.3      |
| 220292_at   | ZNF434    | zinc finger protein 434                                           | -<br>1.32 |
| 220301_at   | CCDC102B  | coiled-coil domain containing<br>102B                             | 1.55      |
| 220309_at   | TTC22     | tetratricopeptide repeat domain<br>22                             | -<br>1.23 |

|             |          |                                                                      |           |
|-------------|----------|----------------------------------------------------------------------|-----------|
| 220330_s_at | SAMSN1   | SAM domain, SH3 domain and nuclear localization signals 1            | 3.4       |
| 220339_s_at | TPSG1    | tryptase gamma 1                                                     | -1.3      |
| 220340_at   | KIAA1772 | KIAA1772                                                             | -<br>1.48 |
| 220373_at   | DCHS2    | dachsous 2 (Drosophila)                                              | -<br>1.22 |
| 220395_at   | DNAJA4   | DnaJ (Hsp40) homolog, subfamily A, member 4                          | -<br>1.51 |
| 220398_at   | GNPTAB   | N-acetylglucosamine-1-phosphate transferase, alpha and beta subunits | -<br>1.27 |
| 220422_at   | UBQLN3   | ubiquilin 3                                                          | -<br>1.22 |
| 220424_at   | NPHS2    | nephrosis 2, idiopathic, steroid-resistant (podocin)                 | -<br>1.43 |

|             |          |                                                              |           |
|-------------|----------|--------------------------------------------------------------|-----------|
| 220439_at   | RIN3     | Ras and Rab interactor 3                                     | -<br>1.26 |
| 220522_at   | CRB1     | crumbs homolog 1 (Drosophila)                                | -<br>1.32 |
| 220531_at   | FLJ14126 | hypothetical protein FLJ14126                                | -<br>1.21 |
| 220535_at   | FAM90A1  | family with sequence similarity<br>90, member A1             | -<br>1.27 |
| 220542_s_at | PLUNC    | palate, lung and nasal<br>epithelium carcinoma<br>associated | -<br>1.53 |
| 220577_at   | GVIN1    | GTPase, very large interferon<br>inducible 1                 | 1.46      |
| 220580_at   | BICC1    | bicaudal C homolog 1<br>(Drosophila)                         | 1.56      |
| 220606_s_at | C17orf48 | chromosome 17 open reading<br>frame 48                       | 1.78      |

|             |          |                                                            |           |
|-------------|----------|------------------------------------------------------------|-----------|
| 220617_s_at | ZNF532   | zinc finger protein 532                                    | 1.41      |
| 220645_at   | FAM55D   | family with sequence similarity<br>55, member D            | -<br>1.23 |
| 220690_s_at | DHRS7B   | dehydrogenase/reductase (SDR<br>family) member 7B          | 1.37      |
| 220704_at   | IKZF1    | IKAROS family zinc finger 1<br>(Ikaros)                    | 1.25      |
| 220708_at   |          | NA                                                         | -<br>1.35 |
| 220722_s_at | SLC5A7   | solute carrier family 5 (choline<br>transporter), member 7 | -<br>1.51 |
| 220745_at   | IL19     | interleukin 19                                             | -<br>1.45 |
| 220749_at   | C10orf68 | chromosome 10 open reading<br>frame 68                     | -<br>1.41 |

|             |          |                                                               |           |
|-------------|----------|---------------------------------------------------------------|-----------|
| 220776_at   | KCNJ14   | potassium inwardly-rectifying channel, subfamily J, member 14 | -<br>1.24 |
| 220779_at   | PADI3    | peptidyl arginine deiminase, type III                         | -1.3      |
| 220811_at   | PRG3     | proteoglycan 3                                                | -<br>1.18 |
| 220815_at   | CTNNA3   | catenin (cadherin-associated protein), alpha 3                | -<br>1.34 |
| 220846_s_at | PRKCZ    | protein kinase C, zeta                                        | -<br>1.27 |
| 220853_at   | GTDC1    | glycosyltransferase-like domain containing 1                  | -<br>1.38 |
| 220857_at   |          | NA                                                            | -<br>1.25 |
| 220892_s_at | PSAT1    | phosphoserine aminotransferase 1                              | -<br>2.62 |
| 220939_s_at | DPP8     | dipeptidyl-peptidase 8                                        | 2.11      |
| 220940_at   | KIAA1641 | KIAA1641                                                      | 2.43      |



|             |          |                                                                     |           |
|-------------|----------|---------------------------------------------------------------------|-----------|
|             |          |                                                                     |           |
| 220944_at   | PGLYRP4  | peptidoglycan recognition<br>protein 4                              | -<br>1.81 |
| 220947_s_at | TBC1D10B | TBC1 domain family, member<br>10B                                   | -1.4      |
| 220962_s_at | PADI1    | peptidyl arginine deiminase,<br>type I                              | -<br>1.47 |
| 220995_at   | STXBP6   | syntaxin binding protein 6<br>(amisyn)                              | -1.2      |
| 220998_s_at | UNC93B1  | unc-93 homolog B1 (C.<br>elegans)                                   | 1.64      |
| 221001_at   | C15orf49 | chromosome 15 open reading<br>frame 49                              | -<br>1.22 |
| 221004_s_at | ITM2C    | integral membrane protein 2C                                        | 1.36      |
| 221025_x_at | PUS7L    | pseudouridylate synthase 7<br>homolog ( <i>S. cerevisiae</i> )-like | -<br>1.27 |
| 221032_s_at | TMPRSS5  | transmembrane protease, serine<br>5 (spinesin)                      | -<br>1.34 |

|             |          |                                                                                         |           |
|-------------|----------|-----------------------------------------------------------------------------------------|-----------|
| 221034_s_at | TEX13B   | testis expressed 13B                                                                    | -<br>1.45 |
| 221039_s_at | DDEF1    | development and differentiation<br>enhancing factor 1                                   | 1.89      |
| 221052_at   | TDRKH    | tudor and KH domain<br>containing                                                       | -<br>1.22 |
| 221058_s_at | CKLF     | chemokine-like factor                                                                   | 1.68      |
| 221087_s_at | APOL3    | apolipoprotein L, 3                                                                     | 2.56      |
| 221097_s_at | KCNMB2   | potassium large conductance<br>calcium-activated channel,<br>subfamily M, beta member 2 | -<br>1.25 |
| 221106_at   | SLC22A17 | solute carrier family 22<br>(organic cation transporter),<br>member 17                  | -<br>1.21 |
| 221113_s_at | WNT16    | wingless-type MMTV<br>integration site family, member<br>16                             | -1.3      |

|             |        |                                                                       |           |
|-------------|--------|-----------------------------------------------------------------------|-----------|
| 221115_s_at | LENEP  | lens epithelial protein                                               | -<br>1.26 |
| 221147_x_at | WWOX   | WW domain containing<br>oxidoreductase                                | -<br>1.49 |
| 221160_s_at | CABP5  | calcium binding protein 5                                             | -<br>1.19 |
| 221162_at   | HHLA1  | HERV-H LTR-associating 1                                              | -<br>1.39 |
| 221197_s_at | CHAT   | choline acetyltransferase                                             | -<br>1.32 |
| 221199_at   | GFRA4  | GDNF family receptor alpha 4                                          | -<br>1.45 |
| 221207_s_at | NBEA   | neurobeachin                                                          | -<br>1.53 |
| 221214_s_at | NELF   | nasal embryonic LHRH factor                                           | -<br>1.41 |
| 221238_at   | NSBP1  | nucleosomal binding protein 1                                         | -<br>1.19 |
| 221240_s_at | B3GNT4 | UDP-GlcNAc:betaGal beta-<br>1,3-N-<br>acetylglucosaminyltransferase 4 | -<br>1.36 |
| 221242_at   |        | NA                                                                    | -         |

|             |          |                                                                    |           |
|-------------|----------|--------------------------------------------------------------------|-----------|
|             |          |                                                                    | 1.47      |
| 221246_x_at | TNS1     | tensin 1                                                           | 1.47      |
| 221260_s_at | FAM130A1 | family with sequence similarity<br>130, member A1                  | 1.65      |
| 221269_s_at | SH3BGRL3 | SH3 domain binding glutamic<br>acid-rich protein like 3            | 1.76      |
| 221273_s_at | RNF208   | ring finger protein 208                                            | -<br>1.39 |
| 221286_s_at | MGC29506 | hypothetical protein<br>MGC29506                                   | 3.11      |
| 221287_at   | RNASEL   | ribonuclease L (2',5'-<br>oligoadenylate synthetase-<br>dependent) | -<br>1.37 |
| 221299_at   | GPR173   | G protein-coupled receptor 173                                     | -<br>1.29 |
| 221313_at   | GPR52    | G protein-coupled receptor 52                                      | -<br>1.43 |
| 221314_at   | GDF9     | growth differentiation factor 9                                    | -1.4      |

|             |         |                                                                               |           |
|-------------|---------|-------------------------------------------------------------------------------|-----------|
| 221318_at   | NEUROD4 | neurogenic differentiation 4                                                  | -<br>1.27 |
| 221357_at   | CHRM4   | cholinergic receptor,<br>muscarinic 4                                         | -<br>1.27 |
| 221382_at   |         | NA                                                                            | -<br>1.38 |
| 221389_at   | PLA2G2E | phospholipase A2, group IIE                                                   | -<br>1.23 |
| 221392_at   | TAS2R4  | taste receptor, type 2, member 4                                              | -<br>1.22 |
| 221399_at   | EDA2R   | ectodysplasin A2 receptor                                                     | -<br>1.42 |
| 221409_at   | OR2S2   | olfactory receptor, family 2,<br>subfamily S, member 2                        | -<br>1.41 |
| 221414_s_at | DEFB126 | defensin, beta 126                                                            | -<br>1.14 |
| 221417_x_at | EDG8    | endothelial differentiation,<br>sphingolipid G-protein-coupled<br>receptor, 8 | -<br>1.2  |

|             |         |                                                         |           |
|-------------|---------|---------------------------------------------------------|-----------|
| 221427_s_at | CCNL2   | cyclin L2                                               | 1.97      |
| 221430_s_at | RNF146  | ring finger protein 146                                 | 1.46      |
| 221431_s_at | OR12D3  | olfactory receptor, family 12,<br>subfamily D, member 3 | -<br>1.24 |
| 221437_s_at | MRPS15  | mitochondrial ribosomal<br>protein S15                  | -<br>1.42 |
| 221444_at   | TAS2R16 | taste receptor, type 2, member<br>16                    | -<br>1.15 |
| 221447_s_at | GLT8D2  | glycosyltransferase 8 domain<br>containing 2            | 1.39      |
| 221448_s_at | TEX15   | testis expressed 15                                     | -<br>1.17 |
| 221453_at   | G6PC2   | glucose-6-phosphatase,<br>catalytic, 2                  | -<br>1.33 |
| 221460_at   | OR2C1   | olfactory receptor, family 2,<br>subfamily C, member 1  | -<br>1.27 |

|             |           |                                                         |           |
|-------------|-----------|---------------------------------------------------------|-----------|
|             |           |                                                         | -         |
| 221462_x_at | KLK15     | kallikrein-related peptidase 15                         | 1.24      |
| 221474_at   | MRLC2     | myosin regulatory light chain<br>MRLC2                  | 1.39      |
| 221475_s_at | RPL15     | ribosomal protein L15                                   | 1.55      |
| 221476_s_at | RPL15     | ribosomal protein L15                                   | 1.38      |
| 221479_s_at | BNIP3L    | BCL2/adenovirus E1B 19kDa<br>interacting protein 3-like | 1.97      |
| 221501_x_at | LOC339047 | hypothetical protein<br>LOC339047                       | 1.5       |
| 221510_s_at | GLS       | glutaminase                                             | 2.36      |
| 221517_s_at | MED17     | mediator complex subunit 17                             | 1.76      |
| 221520_s_at | CDC48     | cell division cycle associated 8                        | -<br>1.29 |
| 221529_s_at | PLVAP     | plasmalemma vesicle<br>associated protein               | 2.73      |

|             |              |                                                         |      |
|-------------|--------------|---------------------------------------------------------|------|
| 221530_s_at | BHLHB3       | basic helix-loop-helix domain<br>containing, class B, 3 | 1.55 |
| 221545_x_at | MED16        | mediator complex subunit 16                             | 1.38 |
| 221553_at   | RP11-217H1.1 | implantation-associated protein                         | 1.92 |
| 221593_s_at | RPL31        | ribosomal protein L31                                   | 1.96 |
| 221612_at   | LRTM1        | leucine-rich repeats and<br>transmembrane domains 1     | 1.16 |
| 221642_at   | TREX1        | three prime repair exonuclease<br>1                     | 1.19 |
| 221670_s_at | LHX3         | LIM homeobox 3                                          | 1.53 |
| 221698_s_at | CLEC7A       | C-type lectin domain family 7,<br>member A              | 2.58 |



|             |         |                                                       |           |
|-------------|---------|-------------------------------------------------------|-----------|
| 221701_s_at | STRA6   | stimulated by retinoic acid gene<br>6 homolog (mouse) | -<br>1.28 |
| 221726_at   | RPL22   | ribosomal protein L22                                 | 1.51      |
| 221729_at   | COL5A2  | collagen, type V, alpha 2                             | 2.07      |
| 221746_at   | UBL4A   | ubiquitin-like 4A                                     | -<br>1.36 |
| 221747_at   | TNS1    | tensin 1                                              | 1.91      |
| 221748_s_at | TNS1    | tensin 1                                              | 1.89      |
| 221756_at   | PIK3IP1 | phosphoinositide-3-kinase<br>interacting protein 1    | 2.6       |
| 221760_at   | MAN1A1  | mannosidase, alpha, class 1A,<br>member 1             | -<br>2.15 |
| 221765_at   | UGCG    | UDP-glucose ceramide<br>glucosyltransferase           | 2.59      |

|             |          |                                                                                                   |           |
|-------------|----------|---------------------------------------------------------------------------------------------------|-----------|
| 221768_at   | SFPQ     | splicing factor<br>proline/glutamine-rich<br>(polypyrimidine tract binding<br>protein associated) | 2.11      |
| 221773_at   | ELK3     | ELK3, ETS-domain protein<br>(SRF accessory protein 2)                                             | 2.36      |
| 221780_s_at | DDX27    | DEAD (Asp-Glu-Ala-Asp) box<br>polypeptide 27                                                      | 1.34      |
| 221808_at   | RAB9A    | RAB9A, member RAS<br>oncogene family                                                              | 1.75      |
| 221816_s_at | PHF11    | PHD finger protein 11                                                                             | 2.18      |
| 221817_at   | DOLPP1   | dolichyl pyrophosphate<br>phosphatase 1                                                           | -<br>1.79 |
| 221821_s_at | C12orf41 | chromosome 12 open reading<br>frame 41                                                            | 1.33      |

|             |         |                                                            |           |
|-------------|---------|------------------------------------------------------------|-----------|
| 221824_s_at | 8-Mar   | membrane-associated ring<br>finger (C3HC4) 8               | -<br>1.54 |
| 221841_s_at | KLF4    | Kruppel-like factor 4 (gut)                                | 4.92      |
| 221850_x_at | CTGLF1  | centaurin, gamma-like family,<br>member 1                  | 1.49      |
| 221856_s_at | FAM63A  | family with sequence similarity<br>63, member A            | -<br>1.34 |
| 221861_at   |         | NA                                                         | -<br>1.33 |
| 221872_at   | RARRES1 | retinoic acid receptor responder<br>(tazarotene induced) 1 | 2.97      |
| 221875_x_at | HLA-F   | major histocompatibility<br>complex, class I, F            | 2.23      |
| 221900_at   | COL8A2  | collagen, type VIII, alpha 2                               | 1.26      |
| 221925_s_at | CSPP1   | centrosome and spindle pole<br>associated protein 1        | 1.34      |

|             |           |                                                          |           |
|-------------|-----------|----------------------------------------------------------|-----------|
| 221942_s_at | GUCY1A3   | guanylate cyclase 1, soluble,<br>alpha 3                 | 2.45      |
| 221943_x_at | RPL38     | ribosomal protein L38                                    | 1.63      |
| 221948_s_at | KLHL22    | kelch-like 22 (Drosophila)                               | -<br>1.25 |
| 221949_at   | LOC222070 | hypothetical protein<br>LOC222070                        | -<br>1.42 |
| 221952_x_at | TRMT5     | TRM5 tRNA methyltransferase<br>5 homolog (S. cerevisiae) | 1.89      |
| 221973_at   |           | NA                                                       | 1.51      |
| 221974_at   | PWCR1     | Prader-Willi syndrome<br>chromosome region 1             | 1.98      |
| 221978_at   | HLA-F     | major histocompatibility<br>complex, class I, F          | 2.16      |
| 221989_at   | RPL10     | ribosomal protein L10                                    | 1.94      |
| 221991_at   | NXP3      | neurexophilin 3                                          | -         |

|             |           |                                                                   |           |
|-------------|-----------|-------------------------------------------------------------------|-----------|
|             |           |                                                                   | 1.34      |
|             |           |                                                                   | -         |
| 221998_s_at | VRK3      | vaccinia related kinase 3                                         | 1.63      |
|             |           |                                                                   | -         |
| 222019_at   | PFDN6     | prefoldin subunit 6                                               | 1.46      |
|             |           |                                                                   |           |
| 222023_at   | AKAP13    | A kinase (PRKA) anchor<br>protein 13                              | 1.28      |
|             |           |                                                                   |           |
| 222040_at   | LOC728844 | hypothetical protein<br>LOC728844                                 | 2.1       |
|             |           |                                                                   | -         |
| 222043_at   | CLU       | clusterin                                                         | 1.91      |
|             |           |                                                                   |           |
| 222052_at   | C19orf54  | chromosome 19 open reading<br>frame 54                            | -<br>1.39 |
|             |           |                                                                   |           |
| 222062_at   | IL27RA    | interleukin 27 receptor, alpha                                    | 1.3       |
|             |           |                                                                   |           |
| 222071_s_at | SLCO4C1   | solute carrier organic anion<br>transporter family, member<br>4C1 | -3.2      |

|             |            |                                                                            |           |
|-------------|------------|----------------------------------------------------------------------------|-----------|
| 222088_s_at | SLC2A14    | solute carrier family 2<br>(facilitated glucose transporter),<br>member 14 | 2.02      |
| 222125_s_at | PH-4       | hypoxia-inducible factor prolyl<br>4-hydroxylase                           | 1.5       |
| 222136_x_at | ZNF43      | zinc finger protein 43                                                     | 1.35      |
| 222150_s_at | tcag7.1314 | hypothetical protein LOC54103                                              | 2.28      |
| 222154_s_at | LOC26010   | viral DNA polymerase-<br>transactivated protein 6                          | 1.6       |
| 222167_at   | PVRL3      | poliovirus receptor-related 3                                              | -<br>1.42 |
| 222185_at   | PKNOX2     | PBX/knotted 1 homeobox 2                                                   | -<br>1.36 |
| 222218_s_at | PILRA      | paired immunoglobulin-like type<br>2 receptor alpha                        | 1.43      |

|             |          |                                                                   |           |
|-------------|----------|-------------------------------------------------------------------|-----------|
| 222233_s_at | DCLRE1C  | DNA cross-link repair 1C<br>(PSO2 homolog, <i>S. cerevisiae</i> ) | 1.6       |
| 222236_s_at | DDEFL1   | development and differentiation<br>enhancing factor-like 1        | -<br>1.58 |
| 222240_s_at | ISYNA1   | myo-inositol 1-phosphate<br>synthase A1                           | 1.35      |
| 222267_at   | FLJ14803 | hypothetical protein FLJ14803                                     | -<br>1.19 |
| 222275_at   |          | NA                                                                | -<br>1.49 |
| 222281_s_at |          | NA                                                                | 1.44      |
| 222288_at   |          | NA                                                                | 1.27      |
| 222296_at   |          | NA                                                                | -<br>1.51 |
| 222298_at   |          | NA                                                                | -<br>1.16 |
| 222302_at   |          | NA                                                                | -<br>1.44 |

|             |         |                                                                       |           |
|-------------|---------|-----------------------------------------------------------------------|-----------|
| 222304_x_at | OR7E47P | olfactory receptor, family 7,<br>subfamily E, member 47<br>pseudogene | -<br>1.42 |
| 222314_x_at | ITPR1   | inositol 1,4,5-triphosphate<br>receptor, type 1                       | 1.31      |
| 222363_at   |         | NA                                                                    | -<br>1.47 |
| 222371_at   | PIAS1   | protein inhibitor of activated<br>STAT, 1                             | 2.28      |
| 222383_s_at | ALOXE3  | arachidonate lipoxygenase 3                                           | -<br>1.22 |
| 31637_s_at  | NR1D1   | nuclear receptor subfamily 1,<br>group D, member 1                    | -<br>1.95 |
| 320_at      | PEX6    | peroxisomal biogenesis factor 6                                       | -<br>1.49 |
| 32259_at    | EZH1    | enhancer of zeste homolog 1<br>(Drosophila)                           | 1.26      |
| 32402_s_at  | SYMPK   | symplekin                                                             | -1.3      |



|          |        |                                                                       |      |
|----------|--------|-----------------------------------------------------------------------|------|
| 32541_at | PPP3CC | protein phosphatase 3 (formerly 2B), catalytic subunit, gamma isoform | 1.71 |
| 33197_at | MYO7A  | myosin VIIA                                                           | 1.47 |
| 33304_at | ISG20  | interferon stimulated exonuclease gene 20kDa                          | 2.58 |
| 33736_at | STOML1 | stomatin (EPB72)-like 1                                               | 1.33 |
| 33768_at | DMWD   | dystrophia myotonica, WD repeat containing                            | 1.48 |
| 34471_at | MYH8   | myosin, heavy chain 8, skeletal muscle, perinatal                     | 1.16 |
| 34846_at | CAMK2B | calcium/calmodulin-dependent protein kinase (CaM kinase) II beta      | 1.38 |

|          |          |                                                                  |           |
|----------|----------|------------------------------------------------------------------|-----------|
| 34868_at | SMG5     | Smg-5 homolog, nonsense mediated mRNA decay factor (C. elegans)  | -<br>1.51 |
| 36019_at | STK19    | serine/threonine kinase 19                                       | -<br>1.27 |
| 36129_at | SGSM2    | small G protein signaling modulator 2                            | -<br>1.37 |
| 36612_at | KIAA0280 | KIAA0280                                                         | -<br>1.56 |
| 36711_at | MAFF     | v-maf musculoaponeurotic fibrosarcoma oncogene homolog F (avian) | 5.51      |
| 36907_at | MVK      | mevalonate kinase (mevalonic aciduria)                           | -<br>1.75 |
| 37004_at | SFTPB    | surfactant, pulmonary-associated protein B                       | -<br>1.18 |
| 37408_at | MRC2     | mannose receptor, C type 2                                       | 1.45      |
| 37586_at | ZNF142   | zinc finger protein 142                                          | -<br>1.13 |

|            |          |                                                  |           |
|------------|----------|--------------------------------------------------|-----------|
| 38043_at   | FAM3A    | family with sequence similarity<br>3, member A   | -<br>1.46 |
| 38149_at   | ARHGAP25 | Rho GTPase activating protein<br>25              | 1.42      |
| 38241_at   | BTN3A3   | butyrophilin, subfamily 3,<br>member A3          | 2.12      |
| 38290_at   | RGS14    | regulator of G-protein signaling<br>14           | -1.5      |
| 38447_at   | ADRBK1   | adrenergic, beta, receptor<br>kinase 1           | -<br>1.42 |
| 38691_s_at | SFTPC    | surfactant, pulmonary-<br>associated protein C   | -<br>1.62 |
| 38707_r_at | E2F4     | E2F transcription factor 4,<br>p107/p130-binding | -2        |
| 38710_at   | OTUB1    | OTU domain, ubiquitin<br>aldehyde binding 1      | -<br>1.42 |

|          |        |                                             |           |
|----------|--------|---------------------------------------------|-----------|
| 38766_at | SRCAP  | Snf2-related CBP activator protein          | -<br>1.25 |
| 38918_at | SOX13  | SRY (sex determining region Y)-box 13       | -<br>1.35 |
| 39548_at | NPAS2  | neuronal PAS domain protein 2               | -<br>1.25 |
| 39582_at | CYLD   | cylindromatosis (turban tumor syndrome)     | -<br>1.57 |
| 396_f_at | EPOR   | erythropoietin receptor                     | -<br>1.89 |
| 39763_at | HPX    | hemopexin                                   | -<br>1.54 |
| 40640_at | NCAPH2 | non-SMC condensin II complex, subunit H2    | -<br>1.29 |
| 41469_at | PI3    | peptidase inhibitor 3, skin-derived (SKALP) | -<br>1.19 |
| 41657_at | STK11  | serine/threonine kinase 11                  | -<br>1.67 |

|            |          |                                       |           |
|------------|----------|---------------------------------------|-----------|
| 43427_at   | ACACB    | acetyl-Coenzyme A<br>carboxylase beta | -<br>2.03 |
| 43544_at   | MED16    | mediator complex subunit 16           | -<br>1.72 |
| 43977_at   | TMEM161A | transmembrane protein 161A            | -<br>1.29 |
| 44120_at   | ADCK2    | aarF domain containing kinase<br>2    | -<br>1.24 |
| 44563_at   | WDR79    | WD repeat domain 79                   | -<br>1.44 |
| 44696_at   | TBC1D13  | TBC1 domain family, member<br>13      | -<br>1.29 |
| 47571_at   | ZNF236   | zinc finger protein 236               | -<br>2.38 |
| 48030_i_at | C5orf4   | chromosome 5 open reading<br>frame 4  | -<br>1.97 |
| 48580_at   | CXXC1    | CXXC finger 1 (PHD domain)            | -<br>1.28 |

|            |           |                                                                    |           |
|------------|-----------|--------------------------------------------------------------------|-----------|
| 48612_at   | N4BP1     | Nedd4 binding protein 1                                            | -<br>1.42 |
| 49306_at   | RASSF4    | Ras association (RalGDS/AF-6) domain family 4                      | 1.71      |
| 51774_s_at | LOC222070 | hypothetical protein<br>LOC222070                                  | -<br>2.06 |
| 52940_at   | SIGIRR    | single immunoglobulin and toll-interleukin 1 receptor (TIR) domain | -<br>1.51 |
| 54970_at   | ZMIZ2     | zinc finger, MIZ-type containing 2                                 | -<br>1.55 |
| 55705_at   | C19orf22  | chromosome 19 open reading frame 22                                | -<br>1.46 |
| 56821_at   | FLJ10815  | amino acid transporter                                             | -<br>1.27 |
| 58900_at   | LOC222070 | hypothetical protein<br>LOC222070                                  | -<br>1.88 |

|            |          |                                                            |      |
|------------|----------|------------------------------------------------------------|------|
| 59625_at   | NOL3     | nucleolar protein 3 (apoptosis repressor with CARD domain) | 1.38 |
| 62987_r_at | CACNG4   | calcium channel, voltage-dependent, gamma subunit 4        | -1.6 |
| 64432_at   | C12orf47 | chromosome 12 open reading frame 47                        | 1.31 |
| 64440_at   | IL17RC   | interleukin 17 receptor C                                  | 1.74 |
| 64474_g_at | DGCR8    | DiGeorge syndrome critical region gene 8                   | 1.45 |
| 64883_at   | MOSPD2   | motile sperm domain containing 2                           | 1.25 |
| 65585_at   | FAM86B1  | family with sequence similarity 86, member B1              | 1.54 |
| 65591_at   | WDR48    | WD repeat domain 48                                        | 1.38 |

|                                     |          |                                                              |      |
|-------------------------------------|----------|--------------------------------------------------------------|------|
| 65718_at                            | GPR124   | G protein-coupled receptor 124                               | 1.4  |
| 91682_at                            | EXOSC4   | exosome component 4                                          | 1.36 |
| 91952_at                            | LOC90379 | hypothetical protein BC002926                                | 1.34 |
| AFFX-<br>HUMISGF3A/M97935_3_a<br>t  | STAT1    | signal transducer and activator<br>of transcription 1, 91kDa | 2.34 |
| AFFX-<br>HUMISGF3A/M97935_M<br>A_at | STAT1    | signal transducer and activator<br>of transcription 1, 91kDa | 2.06 |
| AFFX-<br>HUMISGF3A/M97935_M<br>B_at | STAT1    | signal transducer and activator<br>of transcription 1, 91kDa | 2.39 |
| AFFX-M27830_3_at                    |          | NA                                                           | 1.41 |
| AFFX-M27830_M_at                    |          | NA                                                           | 1.49 |



**Supplemental Table 3-** Differentially expressed genes between HCV and alcohol cirrhotic liver tissues

| <b>Affy ID</b> | <b>Symbol</b> | <b>Gene Name</b>                                                      | <b>Fold</b> |
|----------------|---------------|-----------------------------------------------------------------------|-------------|
| 160020_at      | MMP14         | matrix metalloproteinase 14<br>(membrane-inserted)                    | -<br>1.35   |
| 1729_at        | TRADD         | TNFRSF1A-associated via death<br>domain                               | 1.27        |
| 200000_s_at    | PRPF8         | PRP8 pre-mRNA processing<br>factor 8 homolog ( <i>S. cerevisiae</i> ) | 1.87        |
| 200009_at      | GDI2          | GDP dissociation inhibitor 2                                          | 1.38        |
| 200011_s_at    | ARF3          | ADP-ribosylation factor 3                                             | 1.59        |
| 200013_at      | RPL24         | ribosomal protein L24                                                 | 1.53        |

|             |       |                                                                                |      |
|-------------|-------|--------------------------------------------------------------------------------|------|
| 200019_s_at | FAU   | Finkel-Biskis-Reilly murine sarcoma virus (FBR-MuSV)<br>ubiquitously expressed | 1.44 |
| 200023_s_at | EIF3F | eukaryotic translation initiation factor 3, subunit F                          | 1.82 |
| 200027_at   | NARS  | asparaginyl-tRNA synthetase                                                    | 1.52 |
| 200039_s_at | PSMB2 | proteasome (prosome, macropain) subunit, beta type, 2                          | 1.66 |
| 200043_at   | ERH   | enhancer of rudimentary homolog (Drosophila)                                   | 1.32 |
| 200048_s_at | JTB   | jumping translocation breakpoint                                               | 1.61 |

|             |         |                                                                       |      |
|-------------|---------|-----------------------------------------------------------------------|------|
| 200077_s_at | OAZ1    | ornithine decarboxylase<br>antizyme 1                                 | 1.26 |
| 200078_s_at | ATP6V0B | ATPase, H <sup>+</sup> transporting,<br>lysosomal 21kDa, V0 subunit b | 1.57 |
| 200613_at   | AP2M1   | adaptor-related protein complex<br>2, mu 1 subunit                    | 1.76 |
| 200615_s_at | AP2B1   | adaptor-related protein complex<br>2, beta 1 subunit                  | 1.77 |
| 200622_x_at | CALM3   | calmodulin 3 (phosphorylase<br>kinase, delta)                         | 1.37 |
| 200628_s_at | WARS    | tryptophanyl-tRNA synthetase                                          | 1.69 |
| 200658_s_at | PHB     | prohibitin                                                            | 1.54 |
| 200668_s_at | UBE2D3  | ubiquitin-conjugating enzyme<br>E2D 3 (UBC4/5 homolog, yeast)         | 1.59 |
| 200669_s_at | UBE2D3  | ubiquitin-conjugating enzyme<br>E2D 3 (UBC4/5 homolog, yeast)         | 2.13 |

|             |         |                                                                                 |      |
|-------------|---------|---------------------------------------------------------------------------------|------|
| 200678_x_at | GRN     | granulin                                                                        | 1.64 |
| 200682_s_at | UBE2L3  | ubiquitin-conjugating enzyme<br>E2L 3                                           | 1.69 |
| 200683_s_at | UBE2L3  | ubiquitin-conjugating enzyme<br>E2L 3                                           | 2.36 |
| 200695_at   | PPP2R1A | protein phosphatase 2 (formerly<br>2A), regulatory subunit A , alpha<br>isoform | 1.6  |
| 200710_at   | ACADVL  | acyl-Coenzyme A<br>dehydrogenase, very long chain                               | 1.62 |
| 200711_s_at | SKP1A   | S-phase kinase-associated<br>protein 1A (p19A)                                  | 1.73 |
| 200712_s_at | MAPRE1  | microtubule-associated protein,<br>RP/EB family, member 1                       | 2.17 |
| 200722_s_at | CAPRIN1 | cell cycle associated protein 1                                                 | 1.65 |
| 200723_s_at | CAPRIN1 | cell cycle associated protein 1                                                 | 1.96 |
| 200724_at   | RPL10   | ribosomal protein L10                                                           | -    |

|             |        |                                                                    |      |
|-------------|--------|--------------------------------------------------------------------|------|
|             |        |                                                                    | 1.24 |
| 200726_at   | PPP1CC | protein phosphatase 1, catalytic subunit, gamma isoform            | 1.8  |
| 200742_s_at | TPP1   | tripeptidyl peptidase I                                            | 2.11 |
| 200744_s_at | GNB1   | guanine nucleotide binding protein (G protein), beta polypeptide 1 | 2.13 |
| 200746_s_at | GNB1   | guanine nucleotide binding protein (G protein), beta polypeptide 1 | 1.64 |

|             |        |                                                                            |           |
|-------------|--------|----------------------------------------------------------------------------|-----------|
| 200750_s_at | RAN    | RAN, member RAS oncogene family                                            | 1.9       |
| 200753_x_at | SFRS2  | splicing factor, arginine/serine-rich 2                                    | 1.84      |
| 200754_x_at | SFRS2  | splicing factor, arginine/serine-rich 2                                    | 2         |
| 200756_x_at | CALU   | calumenin                                                                  | 1.39      |
| 200758_s_at | NFE2L1 | nuclear factor (erythroid-derived 2)-like 1                                | 1.36      |
| 200765_x_at | CTNNA1 | catenin (cadherin-associated protein), alpha 1, 102kDa                     | 1.67      |
| 200780_x_at | GNAS   | GNAS complex locus                                                         | 1.9       |
| 200785_s_at | LRP1   | low density lipoprotein-related protein 1 (alpha-2-macroglobulin receptor) | -<br>1.45 |
| 200787_s_at | PEA15  | phosphoprotein enriched in astrocytes 15                                   | 2.09      |

|             |        |                                                                          |      |
|-------------|--------|--------------------------------------------------------------------------|------|
| 200796_s_at | MCL1   | myeloid cell leukemia sequence<br>1 (BCL2-related)                       | 2.04 |
| 200812_at   | CCT7   | chaperonin containing TCP1,<br>subunit 7 (eta)                           | 1.4  |
| 200819_s_at | RPS15  | ribosomal protein S15                                                    | 1.56 |
| 200823_x_at | RPL29  | ribosomal protein L29                                                    | 1.75 |
| 200826_at   | SNRPD2 | small nuclear ribonucleoprotein<br>D2 polypeptide 16.5kDa                | 1.92 |
| 200828_s_at | ZNF207 | zinc finger protein 207                                                  | 2.31 |
| 200846_s_at | PPP1CA | protein phosphatase 1, catalytic<br>subunit, alpha isoform               | 1.55 |
| 200852_x_at | GNB2   | guanine nucleotide binding<br>protein (G protein), beta<br>polypeptide 2 | 1.26 |
| 200863_s_at | RAB11A | RAB11A, member RAS<br>oncogene family                                    | 1.56 |

|             |        |                                                                               |      |
|-------------|--------|-------------------------------------------------------------------------------|------|
| 200866_s_at | PSAP   | prosaposin (variant Gaucher disease and variant metachromatic leukodystrophy) | 2.06 |
| 200867_at   | ZNF313 | zinc finger protein 313                                                       | 1.55 |
| 200868_s_at | ZNF313 | zinc finger protein 313                                                       | 1.81 |
| 200876_s_at | PSMB1  | proteasome (prosome, macropain) subunit, beta type, 1                         | 1.62 |
| 200879_s_at | EPAS1  | endothelial PAS domain protein 1                                              | 1.47 |
| 200881_s_at | DNAJA1 | DnaJ (Hsp40) homolog, subfamily A, member 1                                   | 2.05 |
| 200887_s_at | STAT1  | signal transducer and activator of transcription 1, 91kDa                     | 2.08 |



|             |        |                                                                              |      |
|-------------|--------|------------------------------------------------------------------------------|------|
| 200893_at   | SFRS10 | splicing factor, arginine/serine-rich 10 (transformer 2 homolog, Drosophila) | 1.77 |
| 200900_s_at | M6PR   | mannose-6-phosphate receptor (cation dependent)                              | 1.71 |
| 200901_s_at | M6PR   | mannose-6-phosphate receptor (cation dependent)                              | 2    |
| 200908_s_at | RPLP2  | ribosomal protein, large, P2                                                 | 1.24 |
| 200912_s_at | EIF4A2 | eukaryotic translation initiation factor 4A, isoform 2                       | 1.45 |
| 200918_s_at | SRPR   | signal recognition particle receptor ('docking protein')                     | 1.79 |

|             |          |                                                                                 |           |
|-------------|----------|---------------------------------------------------------------------------------|-----------|
| 200922_at   | KDELR1   | KDEL (Lys-Asp-Glu-Leu)<br>endoplasmic reticulum protein<br>retention receptor 1 | 1.8       |
| 200923_at   | LGALS3BP | lectin, galactoside-binding,<br>soluble, 3 binding protein                      | 3.09      |
| 200927_s_at | RAB14    | RAB14, member RAS oncogene<br>family                                            | 2.53      |
| 200938_s_at | RERE     | arginine-glutamic acid dipeptide<br>(RE) repeats                                | -<br>1.76 |
| 200958_s_at | SDCBP    | syndecan binding protein<br>(syntenin)                                          | 1.43      |
| 200960_x_at | CLTA     | clathrin, light chain (Lca)                                                     | 1.47      |
| 200971_s_at | SERP1    | stress-associated endoplasmic<br>reticulum protein 1                            | 1.58      |
| 200981_x_at | GNAS     | GNAS complex locus                                                              | 1.77      |

|             |        |                                                                                                      |      |
|-------------|--------|------------------------------------------------------------------------------------------------------|------|
| 200987_x_at | PSME3  | proteasome (prosome, macropain) activator subunit 3 (PA28 gamma; Ki)                                 | 1.72 |
| 201001_s_at | UBE2V1 | ubiquitin-conjugating enzyme E2 variant 1                                                            | 2.06 |
| 201014_s_at | PAICS  | phosphoribosylaminoimidazole carboxylase, phosphoribosylaminoimidazole succinocarboxamide synthetase | 1.57 |
| 201043_s_at | ANP32A | acidic (leucine-rich) nuclear phosphoprotein 32 family, member A                                     | 1.85 |
| 201044_x_at | DUSP1  | dual specificity phosphatase 1                                                                       | 2.24 |
| 201047_x_at | RAB6A  | RAB6A, member RAS oncogene family                                                                    | 1.48 |

|             |        |                                                                          |      |
|-------------|--------|--------------------------------------------------------------------------|------|
|             |        |                                                                          |      |
| 201050_at   | PLD3   | phospholipase D family,<br>member 3                                      | 1.81 |
| 201052_s_at | PSMF1  | proteasome (prosome,<br>macropain) inhibitor subunit 1<br>(PI31)         | 1.59 |
| 201066_at   | CYC1   | cytochrome c-1                                                           | 1.64 |
| 201071_x_at | SF3B1  | splicing factor 3b, subunit 1,<br>155kDa                                 | 1.77 |
| 201077_s_at | NHP2L1 | NHP2 non-histone chromosome<br>protein 2-like 1 ( <i>S. cerevisiae</i> ) | 1.7  |
| 201079_at   | SYNGR2 | synaptogyrin 2                                                           | 1.7  |
| 201084_s_at | BCLAF1 | BCL2-associated transcription<br>factor 1                                | 1.46 |
| 201095_at   | DAP    | death-associated protein                                                 | 1.45 |

|             |          |                                                                       |           |
|-------------|----------|-----------------------------------------------------------------------|-----------|
| 201098_at   | COPB2    | coatomer protein complex,<br>subunit beta 2 (beta prime)              | 1.93      |
| 201114_x_at | PSMA7    | proteasome (prosome,<br>macropain) subunit, alpha type,<br>7          | 1.5       |
| 201136_at   | PLP2     | proteolipid protein 2 (colonic<br>epithelium-enriched)                | 1.9       |
| 201145_at   | HAX1     | HCLS1 associated protein X-1                                          | 1.38      |
| 201159_s_at | NMT1     | N-myristoyltransferase 1                                              | -<br>1.59 |
| 201161_s_at | CSDA     | cold shock domain protein A                                           | 2.07      |
| 201171_at   | ATP6V0E1 | ATPase, H <sup>+</sup> transporting,<br>lysosomal 9kDa, V0 subunit e1 | 1.63      |

|             |          |                                                                                               |      |
|-------------|----------|-----------------------------------------------------------------------------------------------|------|
| 201172_x_at | ATP6V0E1 | ATPase, H <sup>+</sup> transporting,<br>lysosomal 9kDa, V0 subunit e1                         | 1.35 |
| 201179_s_at | GNAI3    | guanine nucleotide binding<br>protein (G protein), alpha<br>inhibiting activity polypeptide 3 | 1.8  |
| 201186_at   | LRPAP1   | low density lipoprotein receptor-<br>related protein associated protein<br>1                  | 1.64 |
| 201201_at   | CSTB     | cystatin B (stefin B)                                                                         | 1.53 |
| 201202_at   | PCNA     | proliferating cell nuclear antigen                                                            | 1.84 |
| 201209_at   | HDAC1    | histone deacetylase 1                                                                         | 1.47 |
| 201239_s_at | SPCS2    | signal peptidase complex<br>subunit 2 homolog (S.<br>cerevisiae)                              | 1.56 |

|             |         |                                                       |      |
|-------------|---------|-------------------------------------------------------|------|
| 201245_s_at | OTUB1   | OTU domain, ubiquitin aldehyde binding 1              | 1.74 |
| 201255_x_at | BAT3    | HLA-B associated transcript 3                         | 1.37 |
| 201264_at   | COPE    | coatamer protein complex, subunit epsilon             | 1.7  |
| 201295_s_at | WSB1    | WD repeat and SOCS box-containing 1                   | 2.4  |
| 201297_s_at | MOBKL1B | MOB1, Mps One Binder kinase activator-like 1B (yeast) | 1.71 |
| 201311_s_at | SH3BGRL | SH3 domain binding glutamic acid-rich protein like    | 2.65 |
| 201315_x_at | IFITM2  | interferon induced transmembrane protein 2 (1-8D)     | 1.63 |

|             |         |                                                            |      |
|-------------|---------|------------------------------------------------------------|------|
| 201337_s_at | VAMP3   | vesicle-associated membrane protein 3 (cellubrevin)        | 2.8  |
| 201342_at   | SNRPC   | small nuclear ribonucleoprotein polypeptide C              | 1.47 |
| 201345_s_at | UBE2D2  | ubiquitin-conjugating enzyme E2D 2 (UBC4/5 homolog, yeast) | 1.83 |
| 201351_s_at | YME1L1  | YME1-like 1 ( <i>S. cerevisiae</i> )                       | 1.81 |
| 201359_at   | COPB1   | coatamer protein complex, subunit beta 1                   | 1.71 |
| 201360_at   | CST3    | cystatin C (amyloid angiopathy and cerebral hemorrhage)    | 1.92 |
| 201361_at   | TMEM109 | transmembrane protein 109                                  | 1.52 |



|             |        |                                                                   |      |
|-------------|--------|-------------------------------------------------------------------|------|
| 201383_s_at | NBR1   | neighbor of BRCA1 gene 1                                          | 1.66 |
| 201386_s_at | DHX15  | DEAH (Asp-Glu-Ala-His) box polypeptide 15                         | 2.22 |
| 201387_s_at | UCHL1  | ubiquitin carboxyl-terminal esterase L1 (ubiquitin thiolesterase) | -1.4 |
| 201388_at   | PSMD3  | proteasome (prosome, macropain) 26S subunit, non-ATPase, 3        | 1.66 |
| 201390_s_at | CSNK2B | casein kinase 2, beta polypeptide                                 | 1.58 |

|             |         |                                                              |      |
|-------------|---------|--------------------------------------------------------------|------|
|             |         |                                                              |      |
| 201412_at   | LRP10   | low density lipoprotein receptor-related protein 10          | 2.03 |
| 201421_s_at | WDR77   | WD repeat domain 77                                          | 1.25 |
| 201440_at   | DDX23   | DEAD (Asp-Glu-Ala-Asp) box polypeptide 23                    | 1.57 |
| 201448_at   | TIA1    | TIA1 cytotoxic granule-associated RNA binding protein        | 2.44 |
| 201457_x_at | BUB3    | BUB3 budding uninhibited by benzimidazoles 3 homolog (yeast) | 2.44 |
| 201475_x_at | MARS    | methionyl-tRNA synthetase                                    | 1.48 |
| 201483_s_at | SUPT4H1 | suppressor of Ty 4 homolog 1 (S. cerevisiae)                 | 1.58 |

|             |         |                                                                            |      |
|-------------|---------|----------------------------------------------------------------------------|------|
| 201491_at   | AHSA1   | AHA1, activator of heat shock<br>90kDa protein ATPase homolog<br>1 (yeast) | 1.66 |
| 201500_s_at | PPP1R11 | protein phosphatase 1,<br>regulatory (inhibitor) subunit 11                | 1.47 |
| 201518_at   | CBX1    | chromobox homolog 1 (HP1<br>beta homolog Drosophila )                      | 1.76 |
| 201521_s_at | NCBP2   | nuclear cap binding protein<br>subunit 2, 20kDa                            | 1.51 |
| 201522_x_at | SNRPN   | small nuclear ribonucleoprotein<br>polypeptide N                           | 1.62 |
| 201523_x_at | UBE2N   | ubiquitin-conjugating enzyme<br>E2N (UBC13 homolog, yeast)                 | 2.02 |

|             |         |                                                                           |      |
|-------------|---------|---------------------------------------------------------------------------|------|
| 201527_at   | ATP6V1F | ATPase, H <sup>+</sup> transporting,<br>lysosomal 14kDa, V1 subunit F     | 1.46 |
| 201529_s_at | RPA1    | replication protein A1, 70kDa                                             | 1.47 |
| 201532_at   | PSMA3   | proteasome (prosome,<br>macropain) subunit, alpha type,<br>3              | 1.94 |
| 201551_s_at | LAMP1   | lysosomal-associated membrane<br>protein 1                                | 2.26 |
| 201554_x_at | GYG1    | glycogenin 1                                                              | 2.41 |
| 201559_s_at | CLIC4   | chloride intracellular channel 4                                          | 1.81 |
| 201570_at   | SAMM50  | sorting and assembly machinery<br>component 50 homolog (S.<br>cerevisiae) | 1.59 |

|             |          |                                                                     |      |
|-------------|----------|---------------------------------------------------------------------|------|
| 201583_s_at | SEC23B   | Sec23 homolog B ( <i>S. cerevisiae</i> )                            | 1.86 |
| 201584_s_at | DDX39    | DEAD (Asp-Glu-Ala-Asp) box polypeptide 39                           | 2.04 |
| 201604_s_at | PPP1R12A | protein phosphatase 1, regulatory (inhibitor) subunit 12A           | 1.84 |
| 201620_at   | MBTPS1   | membrane-bound transcription factor peptidase, site 1               | 1.32 |
| 201632_at   | EIF2B1   | eukaryotic translation initiation factor 2B, subunit 1 alpha, 26kDa | 1.9  |
| 201644_at   | TSTA3    | tissue specific transplantation antigen P35B                        | 1.55 |
| 201647_s_at | SCARB2   | scavenger receptor class B, member 2                                | 2.29 |

|             |        |                                                              |           |
|-------------|--------|--------------------------------------------------------------|-----------|
| 201649_at   | UBE2L6 | ubiquitin-conjugating enzyme<br>E2L 6                        | 2.24      |
| 201676_x_at | PSMA1  | proteasome (prosome,<br>macropain) subunit, alpha type,<br>1 | 1.51      |
| 201684_s_at | TOX4   | TOX high mobility group box<br>family member 4               | -<br>1.36 |
| 201685_s_at | TOX4   | TOX high mobility group box<br>family member 4               | 1.48      |
| 201689_s_at | TPD52  | tumor protein D52                                            | 2.34      |
| 201697_s_at | DNMT1  | DNA (cytosine-5-)-<br>methyltransferase 1                    | 1.5       |
| 201698_s_at | SFRS9  | splicing factor, arginine/serine-<br>rich 9                  | 2.07      |
| 201714_at   | TUBG1  | tubulin, gamma 1                                             | 1.51      |
| 201717_at   | MRPL49 | mitochondrial ribosomal protein<br>L49                       | 1.42      |

|             |         |                                                                                               |      |
|-------------|---------|-----------------------------------------------------------------------------------------------|------|
| 201718_s_at | EPB41L2 | erythrocyte membrane protein<br>band 4.1-like 2                                               | 1.8  |
| 201726_at   | ELAVL1  | ELAV (embryonic lethal,<br>abnormal vision, Drosophila)-<br>like 1 (Hu antigen R)             | 1.61 |
| 201727_s_at | ELAVL1  | ELAV (embryonic lethal,<br>abnormal vision, Drosophila)-<br>like 1 (Hu antigen R)             | 1.38 |
| 201736_s_at | 6-Mar   | membrane-associated ring finger<br>(C3HC4) 6                                                  | 1.5  |
| 201742_x_at | SFRS1   | splicing factor, arginine/serine-<br>rich 1 (splicing factor 2,<br>alternate splicing factor) | 2.19 |
| 201746_at   | TP53    | tumor protein p53 (Li-Fraumeni<br>syndrome)                                                   | 1.51 |
| 201751_at   | JOSD1   | Josephin domain containing 1                                                                  | 1.9  |

|             |          |                                                                |      |
|-------------|----------|----------------------------------------------------------------|------|
| 201773_at   | ADNP     | activity-dependent<br>neuroprotector homeobox                  | 2.13 |
| 201776_s_at | KIAA0494 | KIAA0494                                                       | 1.81 |
| 201781_s_at | AIP      | aryl hydrocarbon receptor<br>interacting protein               | 1.61 |
| 201786_s_at | ADAR     | adenosine deaminase, RNA-<br>specific                          | 1.62 |
| 201803_at   | POLR2B   | polymerase (RNA) II (DNA<br>directed) polypeptide B, 140kDa    | 1.62 |
| 201804_x_at | TBCB     | tubulin folding cofactor B                                     | 1.63 |
| 201809_s_at | ENG      | endoglin (Osler-Rendu-Weber<br>syndrome 1)                     | 1.86 |
| 201828_x_at | FAM127A  | family with sequence similarity<br>127, member A               | 1.45 |
| 201835_s_at | PRKAB1   | protein kinase, AMP-activated,<br>beta 1 non-catalytic subunit | 1.89 |



|             |        |                                                                                  |      |
|-------------|--------|----------------------------------------------------------------------------------|------|
| 201837_s_at | SUPT7L | suppressor of Ty 7 (S. cerevisiae)-like                                          | 1.59 |
| 201863_at   | FAM32A | family with sequence similarity 32, member A                                     | 1.22 |
| 201866_s_at | NR3C1  | nuclear receptor subfamily 3, group C, member 1 (glucocorticoid receptor)        | 1.43 |
| 201881_s_at | ARIH1  | ariadne homolog, ubiquitin-conjugating enzyme E2 binding protein, 1 (Drosophila) | 1.63 |
| 201885_s_at | CYB5R3 | cytochrome b5 reductase 3                                                        | 1.58 |
| 201897_s_at | CKS1B  | CDC28 protein kinase regulatory subunit 1B                                       | 2.06 |
| 201898_s_at | UBE2A  | ubiquitin-conjugating enzyme E2A (RAD6 homolog)                                  | 1.82 |

|             |          |                                                         |      |
|-------------|----------|---------------------------------------------------------|------|
| 201899_s_at | UBE2A    | ubiquitin-conjugating enzyme<br>E2A (RAD6 homolog)      | 1.65 |
| 201922_at   | TINP1    | TGF beta-inducible nuclear<br>protein 1                 | 1.73 |
| 201937_s_at | DNPEP    | aspartyl aminopeptidase                                 | 1.79 |
| 201942_s_at | CPD      | carboxypeptidase D                                      | 2.06 |
| 201950_x_at | CAPZB    | capping protein (actin filament)<br>muscle Z-line, beta | 1.65 |
| 201953_at   | CIB1     | calcium and integrin binding 1<br>(calmyrin)            | 1.64 |
| 201956_s_at | GNPAT    | glyceronephosphate O-<br>acyltransferase                | 1.71 |
| 201973_s_at | C7orf28B | chromosome 7 open reading<br>frame 28B                  | 1.55 |
| 201979_s_at | PPP5C    | protein phosphatase 5, catalytic<br>subunit             | 1.52 |

|             |        |                                                                                          |           |
|-------------|--------|------------------------------------------------------------------------------------------|-----------|
| 201988_s_at | CREBL2 | cAMP responsive element<br>binding protein-like 2                                        | 1.53      |
| 202024_at   | ASNA1  | arsA arsenite transporter, ATP-<br>binding, homolog 1 (bacterial)                        | 1.64      |
| 202028_s_at | RPL38  | ribosomal protein L38                                                                    | 2.57      |
| 202048_s_at | CBX6   | chromobox homolog 6                                                                      | -<br>1.92 |
| 202058_s_at | KPNA1  | karyopherin alpha 1 (importin<br>alpha 5)                                                | 1.94      |
| 202086_at   | MX1    | myxovirus (influenza virus)<br>resistance 1, interferon-inducible<br>protein p78 (mouse) | 4.47      |
| 202109_at   | ARFIP2 | ADP-ribosylation factor<br>interacting protein 2 (arfaptin 2)                            | 1.39      |
| 202116_at   | DPF2   | D4, zinc and double PHD<br>fingers family 2                                              | 1.64      |

|             |         |                                                                                       |      |
|-------------|---------|---------------------------------------------------------------------------------------|------|
| 202117_at   | ARHGAP1 | Rho GTPase activating protein 1                                                       | 1.67 |
| 202119_s_at | CPNE3   | copine III                                                                            | 1.38 |
| 202143_s_at | COPS8   | COP9 constitutive<br>photomorphogenic homolog<br>subunit 8 (Arabidopsis)              | 1.86 |
| 202144_s_at | ADSL    | adenylosuccinate lyase                                                                | 1.61 |
| 202145_at   | LY6E    | lymphocyte antigen 6 complex,<br>locus E                                              | 1.85 |
| 202147_s_at | IFRD1   | interferon-related developmental<br>regulator 1                                       | 1.7  |
| 202168_at   | TAF9    | TAF9 RNA polymerase II,<br>TATA box binding protein<br>(TBP)-associated factor, 32kDa | 1.84 |
| 202171_at   | VEZF1   | vascular endothelial zinc finger<br>1                                                 | 1.93 |

|             |         |                                                                                                                                     |           |
|-------------|---------|-------------------------------------------------------------------------------------------------------------------------------------|-----------|
| 202176_at   | ERCC3   | excision repair cross-complementing rodent repair deficiency, complementation group 3 (xeroderma pigmentosum group B complementing) | 1.45      |
| 202185_at   | PLOD3   | procollagen-lysine, 2-oxoglutarate 5-dioxygenase 3                                                                                  | 1.61      |
| 202186_x_at | PPP2R5A | protein phosphatase 2, regulatory subunit B', alpha isoform                                                                         | -<br>1.74 |
| 202200_s_at | SRPK1   | SFRS protein kinase 1                                                                                                               | 1.86      |
| 202205_at   | VASP    | vasodilator-stimulated phosphoprotein                                                                                               | 1.73      |
| 202206_at   | ARL4C   | ADP-ribosylation factor-like 4C                                                                                                     | 1.83      |

|             |        |                                                                   |           |
|-------------|--------|-------------------------------------------------------------------|-----------|
| 202214_s_at | CUL4B  | cullin 4B                                                         | 1.58      |
| 202216_x_at | NFYC   | nuclear transcription factor Y,<br>gamma                          | 1.5       |
| 202239_at   | PARP4  | poly (ADP-ribose) polymerase<br>family, member 4                  | 1.85      |
| 202243_s_at | PSMB4  | proteasome (prosome,<br>macropain) subunit, beta type, 4          | 1.76      |
| 202246_s_at | CDK4   | cyclin-dependent kinase 4                                         | 1.48      |
| 202261_at   | VPS72  | vacuolar protein sorting 72<br>homolog ( <i>S. cerevisiae</i> )   | 1.64      |
| 202320_at   | GTF3C1 | general transcription factor IIIC,<br>polypeptide 1, alpha 220kDa | -<br>1.36 |
| 202322_s_at | GGPS1  | geranylgeranyl diphosphate<br>synthase 1                          | 1.62      |
| 202333_s_at | UBE2B  | ubiquitin-conjugating enzyme<br>E2B (RAD6 homolog)                | 1.65      |

|             |          |                                                             |           |
|-------------|----------|-------------------------------------------------------------|-----------|
|             |          |                                                             |           |
| 202353_s_at | PSMD12   | proteasome (prosome, macropain) 26S subunit, non-ATPase, 12 | 2.09      |
| 202360_at   | MAML1    | mastermind-like 1 (Drosophila)                              | 1.58      |
| 202374_s_at | RAB3GAP2 | RAB3 GTPase activating protein subunit 2 (non-catalytic)    | 1.57      |
| 202411_at   | IFI27    | interferon, alpha-inducible protein 27                      | 14.6<br>6 |
| 202442_at   | AP3S1    | adaptor-related protein complex 3, sigma 1 subunit          | 1.51      |
| 202444_s_at | ERLIN1   | ER lipid raft associated 1                                  | 2.58      |
| 202446_s_at | PLSCR1   | phospholipid scramblase 1                                   | 1.73      |
| 202471_s_at | IDH3G    | isocitrate dehydrogenase 3 (NAD+) gamma                     | 1.67      |

|             |        |                                                                |      |
|-------------|--------|----------------------------------------------------------------|------|
| 202484_s_at | MBD2   | methyl-CpG binding domain<br>protein 2                         | 1.81 |
| 202487_s_at | H2AFV  | H2A histone family, member V                                   | 1.72 |
| 202495_at   | TBCC   | tubulin folding cofactor C                                     | 1.5  |
| 202501_at   | MAPRE2 | microtubule-associated protein,<br>RP/EB family, member 2      | 1.52 |
| 202514_at   | DLG1   | discs, large homolog 1<br>(Drosophila)                         | 1.52 |
| 202520_s_at | MLH1   | mutL homolog 1, colon cancer,<br>nonpolyposis type 2 (E. coli) | 1.89 |
| 202521_at   | CTCF   | CCCTC-binding factor (zinc<br>finger protein)                  | 1.37 |



|             |         |                                                                                            |           |
|-------------|---------|--------------------------------------------------------------------------------------------|-----------|
| 202541_at   | SCYE1   | small inducible cytokine<br>subfamily E, member 1<br>(endothelial monocyte-<br>activating) | 1.77      |
| 202546_at   | VAMP8   | vesicle-associated membrane<br>protein 8 (endobrevin)                                      | 1.47      |
| 202558_s_at | STCH    | stress 70 protein chaperone,<br>microsome-associated, 60kDa                                | 1.79      |
| 202560_s_at | C1orf77 | chromosome 1 open reading<br>frame 77                                                      | 1.87      |
| 202568_s_at | MARK3   | MAP/microtubule affinity-<br>regulating kinase 3                                           | 1.51      |
| 202571_s_at | DLGAP4  | discs, large (Drosophila)<br>homolog-associated protein 4                                  | -<br>1.64 |

|             |          |                                                                     |      |
|-------------|----------|---------------------------------------------------------------------|------|
| 202578_s_at | DDX19A   | DEAD (Asp-Glu-Ala-As) box polypeptide 19A                           | 1.65 |
| 202583_s_at | RANBP9   | RAN binding protein 9                                               | 1.77 |
| 202584_at   | NFX1     | nuclear transcription factor, X-box binding 1                       | 1.69 |
| 202591_s_at | SSBP1    | single-stranded DNA binding protein 1                               | 1.86 |
| 202593_s_at | MIR16    | membrane interacting protein of RGS16                               | 1.82 |
| 202595_s_at | LEPROTL1 | leptin receptor overlapping transcript-like 1                       | 1.94 |
| 202626_s_at | LYN      | v-yes-1 Yamaguchi sarcoma viral related oncogene homolog            | 2.15 |
| 202629_at   | APPBP2   | amyloid beta precursor protein (cytoplasmic tail) binding protein 2 | 1.63 |
| 202635_s_at | POLR2K   | polymerase (RNA) II (DNA directed) polypeptide K, 7.0kDa            | 2.21 |

|             |        |                                                                      |      |
|-------------|--------|----------------------------------------------------------------------|------|
| 202654_x_at | 7-Mar  | membrane-associated ring finger<br>(C3HC4) 7                         | 2.22 |
| 202677_at   | RASA1  | RAS p21 protein activator<br>(GTPase activating protein) 1           | 1.76 |
| 202678_at   | GTF2A2 | general transcription factor IIA,<br>2, 12kDa                        | 1.67 |
| 202691_at   | SNRPD1 | small nuclear ribonucleoprotein<br>D1 polypeptide 16kDa              | 1.32 |
| 202697_at   | NUDT21 | nudix (nucleoside diphosphate<br>linked moiety X)-type motif 21      | 1.41 |
| 202742_s_at | PRKACB | protein kinase, cAMP-<br>dependent, catalytic, beta                  | 2.26 |
| 202785_at   | NDUFA7 | NADH dehydrogenase<br>(ubiquinone) 1 alpha<br>subcomplex, 7, 14.5kDa | 1.45 |

|             |        |                                                                                         |           |
|-------------|--------|-----------------------------------------------------------------------------------------|-----------|
| 202799_at   | CLPP   | ClpP caseinolytic peptidase,<br>ATP-dependent, proteolytic<br>subunit homolog (E. coli) | 1.72      |
| 202802_at   | DHPS   | deoxyhypusine synthase                                                                  | 1.35      |
| 202803_s_at | ITGB2  | integrin, beta 2 (complement<br>component 3 receptor 3 and 4<br>subunit)                | 2.14      |
| 202810_at   | DRG1   | developmentally regulated GTP<br>binding protein 1                                      | 1.3       |
| 202816_s_at | SS18   | synovial sarcoma translocation,<br>chromosome 18                                        | 1.65      |
| 202841_x_at | OGFR   | opioid growth factor receptor                                                           | 1.44      |
| 202845_s_at | RALBP1 | ralA binding protein 1                                                                  | 1.26      |
| 202849_x_at | GRK6   | G protein-coupled receptor<br>kinase 6                                                  | -<br>1.65 |
| 202857_at   | TMEM4  | transmembrane protein 4                                                                 | 1.56      |

|             |          |                                                                               |           |
|-------------|----------|-------------------------------------------------------------------------------|-----------|
| 202868_s_at | POP4     | processing of precursor 4,<br>ribonuclease P/MRP subunit (S.<br>cerevisiae)   | 1.67      |
| 202873_at   | ATP6V1C1 | ATPase, H <sup>+</sup> transporting,<br>lysosomal 42kDa, V1 subunit<br>C1     | 1.24      |
| 202882_x_at | NOL7     | nucleolar protein 7, 27kDa                                                    | 2.34      |
| 202886_s_at | PPP2R1B  | protein phosphatase 2 (formerly<br>2A), regulatory subunit A, beta<br>isoform | 2.3       |
| 202897_at   | SIRPA    | signal-regulatory protein alpha                                               | 1.57      |
| 2028_s_at   | E2F1     | E2F transcription factor 1                                                    | -<br>1.44 |
| 202902_s_at | CTSS     | cathepsin S                                                                   | 2.88      |
| 202911_at   | MSH6     | mutS homolog 6 (E. coli)                                                      | 1.52      |

|             |          |                                                    |           |
|-------------|----------|----------------------------------------------------|-----------|
| 202913_at   | ARHGEF11 | Rho guanine nucleotide<br>exchange factor (GEF) 11 | 1.4       |
| 202916_s_at | FAM20B   | family with sequence similarity<br>20, member B    | 1.49      |
| 202943_s_at | NAGA     | N-acetylgalactosaminidase,<br>alpha-               | 1.59      |
| 202953_at   | C1QB     | complement component 1, q<br>subcomponent, B chain | 2.45      |
| 202977_s_at | CREBZF   | CREB/ATF bZIP transcription<br>factor              | -<br>1.79 |
| 202978_s_at | CREBZF   | CREB/ATF bZIP transcription<br>factor              | 1.44      |

|             |        |                                                                                                        |           |
|-------------|--------|--------------------------------------------------------------------------------------------------------|-----------|
| 202979_s_at | CREBZF | CREB/ATF bZIP transcription factor                                                                     | 1.94      |
| 203013_at   | ECD    | ecdysoneless homolog (Drosophila)                                                                      | 1.61      |
| 203034_s_at | RPL27A | ribosomal protein L27a                                                                                 | 1.36      |
| 203051_at   | BAHD1  | bromo adjacent homology domain containing 1                                                            | -<br>1.48 |
| 203069_at   | SV2A   | synaptic vesicle glycoprotein 2A                                                                       | -<br>1.65 |
| 203085_s_at | TGFB1  | transforming growth factor, beta 1                                                                     | 2.43      |
| 203089_s_at | HTRA2  | HtrA serine peptidase 2                                                                                | 1.55      |
| 203104_at   | CSF1R  | colony stimulating factor 1 receptor, formerly McDonough feline sarcoma viral (v-fms) oncogene homolog | 1.95      |
| 203107_x_at | RPS2   | ribosomal protein S2                                                                                   | 1.56      |

|             |        |                                                                |      |
|-------------|--------|----------------------------------------------------------------|------|
|             |        |                                                                |      |
| 203109_at   | UBE2M  | ubiquitin-conjugating enzyme<br>E2M (UBC12 homolog, yeast)     | 1.6  |
| 203136_at   | RABAC1 | Rab acceptor 1 (prenylated)                                    | 2.18 |
| 203148_s_at | TRIM14 | tripartite motif-containing 14                                 | 1.81 |
| 203152_at   | MRPL40 | mitochondrial ribosomal protein<br>L40                         | 1.46 |
| 203153_at   | IFIT1  | interferon-induced protein with<br>tetratricopeptide repeats 1 | 5.74 |
| 203187_at   | DOCK1  | dedicator of cytokinesis 1                                     | -1.4 |



|             |         |                                                                                            |           |
|-------------|---------|--------------------------------------------------------------------------------------------|-----------|
|             |         |                                                                                            |           |
| 203189_s_at | NDUFS8  | NADH dehydrogenase<br>(ubiquinone) Fe-S protein 8,<br>23kDa (NADH-coenzyme Q<br>reductase) | 1.7       |
| 203194_s_at | NUP98   | nucleoporin 98kDa                                                                          | 1.57      |
| 203218_at   | MAPK9   | mitogen-activated protein kinase<br>9                                                      | 1.7       |
| 203225_s_at | RFK     | riboflavin kinase                                                                          | 1.78      |
| 203226_s_at | TSPAN31 | tetraspanin 31                                                                             | 1.76      |
| 203246_s_at | TUSC4   | tumor suppressor candidate 4                                                               | 1.55      |
| 203256_at   | CDH3    | cadherin 3, type 1, P-cadherin<br>(placental)                                              | -<br>1.38 |
| 203264_s_at | ARHGEF9 | Cdc42 guanine nucleotide<br>exchange factor (GEF) 9                                        | -<br>1.28 |
| 203274_at   | F8A1    | coagulation factor VIII-<br>associated (intronic transcript) 1                             | 1.44      |

|             |         |                                                                   |           |
|-------------|---------|-------------------------------------------------------------------|-----------|
| 203275_at   | IRF2    | interferon regulatory factor 2                                    | 1.56      |
| 203304_at   | BAMBI   | BMP and activin membrane-bound inhibitor homolog (Xenopus laevis) | 1.93      |
| 203306_s_at | SLC35A1 | solute carrier family 35 (CMP-sialic acid transporter), member A1 | 1.52      |
| 203328_x_at | IDE     | insulin-degrading enzyme                                          | 1.5       |
| 203331_s_at | INPP5D  | inositol polyphosphate-5-phosphatase, 145kDa                      | -<br>1.51 |
| 203352_at   | ORC4L   | origin recognition complex, subunit 4-like (yeast)                | 1.34      |
| 203357_s_at | CAPN7   | calpain 7                                                         | 1.86      |
| 203376_at   | CDC40   | cell division cycle 40 homolog (S. cerevisiae)                    | 1.41      |

|             |       |                                                                      |           |
|-------------|-------|----------------------------------------------------------------------|-----------|
| 203393_at   | HES1  | hairy and enhancer of split 1,<br>(Drosophila)                       | -<br>1.32 |
| 203399_x_at | PSG3  | pregnancy specific beta-1-<br>glycoprotein 3                         | -<br>1.14 |
| 203428_s_at | ASF1A | ASF1 anti-silencing function 1<br>homolog A ( <i>S. cerevisiae</i> ) | 2.32      |
| 203432_at   | TMPO  | thymopoietin                                                         | 1.63      |
| 203435_s_at | MME   | membrane metallo-<br>endopeptidase                                   | -<br>2.19 |
| 203436_at   | RPP30 | ribonuclease P/MRP 30kDa<br>subunit                                  | 1.53      |
| 203457_at   | STX7  | syntaxin 7                                                           | 1.39      |
| 203461_at   | CHD2  | chromodomain helicase DNA<br>binding protein 2                       | -<br>1.33 |
| 203471_s_at | PLEK  | pleckstrin                                                           | 1.99      |
| 203488_at   | LPHN1 | latrophilin 1                                                        | -<br>1.65 |

|             |         |                                                |           |
|-------------|---------|------------------------------------------------|-----------|
| 203507_at   | CD68    | CD68 molecule                                  | -<br>1.44 |
| 203512_at   | TRAPPC3 | trafficking protein particle<br>complex 3      | 1.41      |
| 203513_at   | SPG11   | spastic paraplegia 11 (autosomal<br>recessive) | 1.52      |
| 203527_s_at | APC     | adenomatosis polyposis coli                    | -<br>1.31 |
| 203530_s_at | STX4    | syntaxin 4                                     | 1.61      |
| 203550_s_at | C1orf2  | chromosome 1 open reading<br>frame 2           | -<br>1.23 |
| 203583_at   | UNC50   | unc-50 homolog (C. elegans)                    | 1.77      |
| 203584_at   | TTC35   | tetratricopeptide repeat domain<br>35          | 1.96      |
| 203585_at   | ZNF185  | zinc finger protein 185 (LIM<br>domain)        | -<br>1.54 |

|             |         |                                                              |           |
|-------------|---------|--------------------------------------------------------------|-----------|
| 203594_at   | RTCD1   | RNA terminal phosphate cyclase domain 1                      | 1.95      |
| 203595_s_at | IFIT5   | interferon-induced protein with tetratricopeptide repeats 5  | 1.75      |
| 203601_s_at | ZBTB17  | zinc finger and BTB domain containing 17                     | -<br>1.89 |
| 203624_at   | SFRS17A | splicing factor, arginine/serine-rich 17A                    | 1.78      |
| 203633_at   | CPT1A   | carnitine palmitoyltransferase 1A (liver)                    | 2.04      |
| 203643_at   | ERF     | Ets2 repressor factor                                        | 1.73      |
| 203669_s_at | DGAT1   | diacylglycerol O-acyltransferase homolog 1 (mouse)           | 1.84      |
| 203676_at   | GNS     | glucosamine (N-acetyl)-6-sulfatase (Sanfilippo disease IIID) | 1.54      |
| 203694_s_at | DHX16   | DEAH (Asp-Glu-Ala-His) box polypeptide 16                    | 1.67      |

|             |       |                                                          |      |
|-------------|-------|----------------------------------------------------------|------|
| 203726_s_at | LAMA3 | laminin, alpha 3                                         | 1.43 |
| 203729_at   | EMP3  | epithelial membrane protein 3                            | 1.98 |
| 203734_at   | FOXJ2 | forkhead box J2                                          | -    |
| 203747_at   | AQP3  | aquaporin 3 (Gill blood group)                           | 1.48 |
| 203748_x_at | RBMS1 | RNA binding motif, single stranded interacting protein 1 | 1.91 |
| 203749_s_at | RARA  | retinoic acid receptor, alpha                            | 1.98 |
| 203839_s_at | TNK2  | tyrosine kinase, non-receptor, 2                         | -    |
| 203885_at   | RAB21 | RAB21, member RAS oncogene family                        | 1.82 |
| 203891_s_at | DAPK3 | death-associated protein kinase 3                        | -1.9 |

|           |           |                                                                                       |           |
|-----------|-----------|---------------------------------------------------------------------------------------|-----------|
| 203893_at | TAF9      | TAF9 RNA polymerase II,<br>TATA box binding protein<br>(TBP)-associated factor, 32kDa | 1.96      |
| 203901_at | MAP3K7IP1 | mitogen-activated protein kinase<br>kinase kinase 7 interacting<br>protein 1          | -<br>1.32 |
| 203909_at | SLC9A6    | solute carrier family 9<br>(sodium/hydrogen exchanger),<br>member 6                   | 1.62      |
| 203915_at | CXCL9     | chemokine (C-X-C motif) ligand<br>9                                                   | 3.4       |
| 203932_at | HLA-DMB   | major histocompatibility<br>complex, class II, DM beta                                | 1.86      |
| 203933_at | RAB11FIP3 | RAB11 family interacting<br>protein 3 (class II)                                      | -<br>1.43 |

|             |         |                                                           |           |
|-------------|---------|-----------------------------------------------------------|-----------|
| 203944_x_at | BTN2A1  | butyrophilin, subfamily 2,<br>member A1                   | 1.87      |
| 203953_s_at | CLDN3   | claudin 3                                                 | 1.73      |
| 203964_at   | NMI     | N-myc (and STAT) interactor                               | 1.67      |
| 203978_at   | NUBP1   | nucleotide binding protein 1<br>(MinD homolog, E. coli)   | 1.43      |
| 203994_s_at | C21orf2 | chromosome 21 open reading<br>frame 2                     | -<br>1.58 |
| 204000_at   | GNB5    | guanine nucleotide binding<br>protein (G protein), beta 5 | 1.9       |
| 204031_s_at | PCBP2   | poly(rC) binding protein 2                                | 1.61      |
| 204042_at   | WASF3   | WAS protein family, member 3                              | 1.69      |
| 204050_s_at | CLTA    | clathrin, light chain (Lca)                               | 1.42      |



|             |        |                                                                                    |           |
|-------------|--------|------------------------------------------------------------------------------------|-----------|
| 204053_x_at | PTEN   | phosphatase and tensin homolog<br>(mutated in multiple advanced<br>cancers 1)      | 1.77      |
| 204056_s_at | MVK    | mevalonate kinase (mevalonic<br>aciduria)                                          | -<br>1.53 |
| 204077_x_at | ENTPD4 | ectonucleoside triphosphate<br>diphosphohydrolase 4                                | -<br>1.65 |
| 204091_at   | PDE6D  | phosphodiesterase 6D, cGMP-<br>specific, rod, delta                                | 1.75      |
| 204106_at   | TESK1  | testis-specific kinase 1                                                           | 1.45      |
| 204108_at   | NFYA   | nuclear transcription factor Y,<br>alpha                                           | 1.45      |
| 204138_s_at | MZF1   | myeloid zinc finger 1                                                              | -1.5      |
| 204162_at   | NDC80  | NDC80 homolog, kinetochore<br>complex component ( <i>S.</i><br><i>cerevisiae</i> ) | 1.27      |

|             |          |                                                                            |      |
|-------------|----------|----------------------------------------------------------------------------|------|
| 204169_at   | IMPDH1   | IMP (inosine monophosphate)<br>dehydrogenase 1                             | 1.51 |
| 204174_at   | ALOX5AP  | arachidonate 5-lipoxygenase-<br>activating protein                         | 2.17 |
| 204186_s_at | PPID     | peptidylprolyl isomerase D<br>(cyclophilin D)                              | 1.75 |
| 204187_at   | GMPR     | guanosine monophosphate<br>reductase                                       | 1.55 |
| 204192_at   | CD37     | CD37 molecule                                                              | 2.27 |
| 204205_at   | APOBEC3G | apolipoprotein B mRNA editing<br>enzyme, catalytic polypeptide-<br>like 3G | 2.01 |
| 204215_at   | C7orf23  | chromosome 7 open reading<br>frame 23                                      | 2.38 |
| 204226_at   | STAU2    | staufen, RNA binding protein,<br>homolog 2 (Drosophila)                    | 1.49 |

|             |          |                                                                           |           |
|-------------|----------|---------------------------------------------------------------------------|-----------|
| 204228_at   | PPIH     | peptidylprolyl isomerase H<br>(cyclophilin H)                             | 1.39      |
| 204234_s_at | ZNF195   | zinc finger protein 195                                                   | 1.56      |
| 204238_s_at | C6orf108 | chromosome 6 open reading<br>frame 108                                    | 1.72      |
| 204239_s_at | NNAT     | neuronatin                                                                | -<br>1.51 |
| 204246_s_at | DCTN3    | dynactin 3 (p22)                                                          | 1.91      |
| 204248_at   | GNA11    | guanine nucleotide binding<br>protein (G protein), alpha 11 (Gq<br>class) | 1.77      |
| 204253_s_at | VDR      | vitamin D (1,25-<br>dihydroxyvitamin D3) receptor                         | -<br>1.49 |

|             |        |                                                                                           |           |
|-------------|--------|-------------------------------------------------------------------------------------------|-----------|
| 204267_x_at | PKMYT1 | protein kinase, membrane associated tyrosine/threonine 1                                  | -<br>1.68 |
| 204279_at   | PSMB9  | proteasome (prosome, macropain) subunit, beta type, 9 (large multifunctional peptidase 2) | 2.26      |
| 204286_s_at | PMAIP1 | phorbol-12-myristate-13-acetate-induced protein 1                                         | 1.23      |
| 204292_x_at | STK11  | serine/threonine kinase 11                                                                | -<br>1.73 |
| 204297_at   | PIK3C3 | phosphoinositide-3-kinase, class 3                                                        | 1.57      |
| 204299_at   | FUSIP1 | FUS interacting protein (serine/arginine-rich) 1                                          | 1.79      |

|             |        |                                                                       |           |
|-------------|--------|-----------------------------------------------------------------------|-----------|
| 204312_x_at | CREB1  | cAMP responsive element<br>binding protein 1                          | 1.43      |
| 204331_s_at | MRPS12 | mitochondrial ribosomal protein<br>S12                                | 2.12      |
| 204355_at   | DHX30  | DEAH (Asp-Glu-Ala-His) box<br>polypeptide 30                          | 2.19      |
| 204366_s_at | GTF3C2 | general transcription factor IIIC,<br>polypeptide 2, beta 110kDa      | 1.49      |
| 204377_s_at | VPRBP  | Vpr (HIV-1) binding protein                                           | -1.4      |
| 204393_s_at | ACPP   | acid phosphatase, prostate                                            | -<br>1.15 |
| 204397_at   | EML2   | echinoderm microtubule<br>associated protein like 2                   | -1.5      |
| 204405_x_at | DIMT1L | DIM1 dimethyladenosine<br>transferase 1-like ( <i>S. cerevisiae</i> ) | 1.78      |

|             |           |                                                                     |           |
|-------------|-----------|---------------------------------------------------------------------|-----------|
| 204426_at   | TMED2     | transmembrane emp24 domain<br>trafficking protein 2                 | 2.11      |
| 204447_at   | ProSAPiP1 | ProSAPiP1 protein                                                   | -<br>1.35 |
| 204451_at   | FZD1      | frizzled homolog 1 (Drosophila)                                     | 1.8       |
| 204480_s_at | C9orf16   | chromosome 9 open reading<br>frame 16                               | 2.61      |
| 204486_at   | KCNQ1     | potassium voltage-gated<br>channel, KQT-like subfamily,<br>member 1 | -<br>1.73 |
| 204493_at   | BID       | BH3 interacting domain death<br>agonist                             | 1.94      |
| 204533_at   | CXCL10    | chemokine (C-X-C motif) ligand<br>10                                | 7.82      |
| 204535_s_at | REST      | RE1-silencing transcription<br>factor                               | -<br>2.44 |

|             |        |                                                                        |           |
|-------------|--------|------------------------------------------------------------------------|-----------|
| 204559_s_at | LSM7   | LSM7 homolog, U6 small nuclear RNA associated ( <i>S. cerevisiae</i> ) | 1.81      |
| 204566_at   | PPM1D  | protein phosphatase 1D magnesium-dependent, delta isoform              | 1.44      |
| 204585_s_at | L1CAM  | L1 cell adhesion molecule                                              | -1.3      |
| 204599_s_at | MRPL28 | mitochondrial ribosomal protein L28                                    | -<br>1.79 |
| 204601_at   | N4BP1  | Nedd4 binding protein 1                                                | 1.53      |
| 204643_s_at | ENOX2  | ecto-NOX disulfide-thiol exchanger 2                                   | -<br>1.31 |
| 204649_at   | TROAP  | trophinin associated protein (tastin)                                  | -<br>1.43 |
| 204688_at   | SGCE   | sarcoglycan, epsilon                                                   | 2.83      |
| 204698_at   | ISG20  | interferon stimulated exonuclease gene 20kDa                           | 3.96      |
| 204725_s_at | NCK1   | NCK adaptor protein 1                                                  | 1.74      |

|             |        |                                                             |           |
|-------------|--------|-------------------------------------------------------------|-----------|
| 204737_s_at | MYH7   | myosin, heavy chain 7, cardiac muscle, beta                 | -<br>1.87 |
| 204743_at   | TAGLN3 | transgelin 3                                                | -<br>1.53 |
| 204744_s_at | IARS   | isoleucyl-tRNA synthetase                                   | 1.6       |
| 204747_at   | IFIT3  | interferon-induced protein with tetratricopeptide repeats 3 | 2.46      |
| 204751_x_at | DSC2   | desmocollin 2                                               | 1.31      |
| 204772_s_at | TTF1   | transcription termination factor, RNA polymerase I          | 1.2       |
| 204774_at   | EVI2A  | ecotropic viral integration site 2A                         | 2.76      |
| 204779_s_at | HOXB7  | homeobox B7                                                 | -<br>1.33 |
| 204790_at   | SMAD7  | SMAD family member 7                                        | 2.1       |
| 204791_at   | NR2C1  | nuclear receptor subfamily 2, group C, member 1             | 1.81      |



|             |        |                                                      |           |
|-------------|--------|------------------------------------------------------|-----------|
| 204806_x_at | HLA-F  | major histocompatibility complex, class I, F         | 1.94      |
| 204807_at   | TMEM5  | transmembrane protein 5                              | 1.23      |
| 204820_s_at | BTN3A3 | butyrophilin, subfamily 3, member A3                 | 2.12      |
| 204821_at   | BTN3A3 | butyrophilin, subfamily 3, member A3                 | 1.73      |
| 204826_at   | CCNF   | cyclin F                                             | -<br>1.39 |
| 204849_at   | TCFL5  | transcription factor-like 5 (basic helix-loop-helix) | 1.67      |
| 204850_s_at | DCX    | doublecortex; lissencephaly, X-linked (doublecortin) | -<br>1.24 |
| 204877_s_at | TAOK2  | TAO kinase 2                                         | -<br>1.37 |
| 204885_s_at | MSLN   | mesothelin                                           | -<br>1.58 |

|             |        |                                                                          |           |
|-------------|--------|--------------------------------------------------------------------------|-----------|
| 204890_s_at | LCK    | lymphocyte-specific protein<br>tyrosine kinase                           | 1.46      |
| 204900_x_at | SAP30  | Sin3A-associated protein, 30kDa                                          | 2.61      |
| 204954_s_at | DYRK1B | dual-specificity tyrosine-(Y)-<br>phosphorylation regulated kinase<br>1B | -<br>1.59 |
| 204957_at   | ORC5L  | origin recognition complex,<br>subunit 5-like (yeast)                    | 1.85      |
| 204972_at   | OAS2   | 2'-5'-oligoadenylate synthetase<br>2, 69/71kDa                           | 2.93      |
| 205015_s_at | TGFA   | transforming growth factor,<br>alpha                                     | -<br>1.38 |
| 205039_s_at | IKZF1  | IKAROS family zinc finger 1<br>(Ikaros)                                  | 1.81      |

|             |       |                                                                                          |           |
|-------------|-------|------------------------------------------------------------------------------------------|-----------|
| 205055_at   | ITGAE | integrin, alpha E (antigen CD103, human mucosal lymphocyte antigen 1; alpha polypeptide) | 1.67      |
| 205058_at   | IDUA  | iduronidase, alpha-L-                                                                    | -<br>1.71 |
| 205077_s_at | PIGF  | phosphatidylinositol glycan anchor biosynthesis, class F                                 | 1.87      |
| 205078_at   | PIGF  | phosphatidylinositol glycan anchor biosynthesis, class F                                 | 1.77      |
| 205120_s_at | SGCB  | sarcoglycan, beta (43kDa dystrophin-associated glycoprotein)                             | 1.58      |
| 205121_at   | SGCB  | sarcoglycan, beta (43kDa dystrophin-associated glycoprotein)                             | 1.19      |
| 205125_at   | PLCD1 | phospholipase C, delta 1                                                                 | -         |

|             |        |                                                                                          |           |
|-------------|--------|------------------------------------------------------------------------------------------|-----------|
|             |        |                                                                                          | 1.69      |
| 205126_at   | VRK2   | vaccinia related kinase 2                                                                | 2.03      |
|             |        |                                                                                          | -         |
| 205144_at   | MYL5   | myosin, light chain 5, regulatory                                                        | 1.27      |
|             |        |                                                                                          |           |
| 205153_s_at | CD40   | CD40 molecule, TNF receptor superfamily member 5                                         | 1.5       |
|             |        |                                                                                          |           |
| 205183_at   | HNRPD  | heterogeneous nuclear ribonucleoprotein D (AU-rich element RNA binding protein 1, 37kDa) | -<br>1.59 |
|             |        |                                                                                          | -         |
| 205199_at   | CA9    | carbonic anhydrase IX                                                                    | 1.53      |
|             |        |                                                                                          |           |
| 205218_at   | POLR3F | polymerase (RNA) III (DNA directed) polypeptide F, 39 kDa                                | 1.33      |
|             |        |                                                                                          |           |
| 205219_s_at | GALK2  | galactokinase 2                                                                          | 1.47      |

|             |           |                                                                                                 |           |
|-------------|-----------|-------------------------------------------------------------------------------------------------|-----------|
| 205270_s_at | LCP2      | lymphocyte cytosolic protein 2<br>(SH2 domain containing<br>leukocyte protein of 76kDa)         | 1.71      |
| 205292_s_at | HNRNPA2B1 | heterogeneous nuclear<br>ribonucleoprotein A2/B1                                                | 1.36      |
| 205319_at   | PSCA      | prostate stem cell antigen                                                                      | -<br>1.41 |
| 205324_s_at | FTSJ1     | FtsJ homolog 1 (E. coli)                                                                        | 2.01      |
| 205327_s_at | ACVR2A    | activin A receptor, type IIA                                                                    | -<br>1.58 |
| 205363_at   | BBOX1     | butyrobetaine (gamma), 2-<br>oxoglutarate dioxygenase<br>(gamma-butyrobetaine<br>hydroxylase) 1 | -5.9      |
| 205390_s_at | ANK1      | ankyrin 1, erythrocytic                                                                         | -<br>1.32 |

|             |        |                                                                              |           |
|-------------|--------|------------------------------------------------------------------------------|-----------|
| 205417_s_at | DAG1   | dystroglycan 1 (dystrophin-associated glycoprotein 1)                        | 1.68      |
| 205483_s_at | ISG15  | ISG15 ubiquitin-like modifier                                                | 6.15      |
| 205488_at   | GZMA   | granzyme A (granzyme 1, cytotoxic T-lymphocyte-associated serine esterase 3) | 2.46      |
| 205537_s_at | VAV2   | vav 2 guanine nucleotide exchange factor                                     | -<br>1.88 |
| 205543_at   | HSPA4L | heat shock 70kDa protein 4-like                                              | 1.73      |

|             |         |                                                               |           |
|-------------|---------|---------------------------------------------------------------|-----------|
| 205589_at   | MYL3    | myosin, light chain 3, alkali;<br>ventricular, skeletal, slow | -<br>1.38 |
| 205590_at   | RASGRP1 | RAS guanyl releasing protein 1<br>(calcium and DAG-regulated) | 1.83      |
| 205621_at   | ALKBH1  | alkB, alkylation repair homolog<br>1 (E. coli)                | 1.49      |
| 205660_at   | OASL    | 2'-5'-oligoadenylate synthetase-<br>like                      | 3.47      |
| 205663_at   | PCBP3   | poly(rC) binding protein 3                                    | -<br>1.61 |
| 205729_at   | OSMR    | oncostatin M receptor                                         | 2.21      |
| 205734_s_at | AFF3    | AF4/FMR2 family, member 3                                     | -<br>1.35 |
| 205777_at   | DUSP9   | dual specificity phosphatase 9                                | -<br>1.65 |
| 205778_at   | KLK7    | kallikrein-related peptidase 7                                | -<br>1.48 |

|             |         |                                                           |           |
|-------------|---------|-----------------------------------------------------------|-----------|
| 205781_at   | C16orf7 | chromosome 16 open reading<br>frame 7                     | -1.8      |
| 205843_x_at | CRAT    | carnitine acetyltransferase                               | -<br>1.43 |
| 205852_at   | CDK5R2  | cyclin-dependent kinase 5,<br>regulatory subunit 2 (p39)  | -<br>1.68 |
| 205855_at   | ZNF197  | zinc finger protein 197                                   | -<br>1.33 |
| 205869_at   | PRSS1   | protease, serine, 1 (trypsin 1)                           | -<br>1.48 |
| 205879_x_at | RET     | ret proto-oncogene                                        | -<br>1.43 |
| 205890_s_at | UBD     | ubiquitin D                                               | 2.89      |
| 205914_s_at | GRIN1   | glutamate receptor, ionotropic,<br>N-methyl D-aspartate 1 | -<br>2.16 |
| 205919_at   | HBE1    | hemoglobin, epsilon 1                                     | -<br>1.44 |



|             |         |                                                                                         |           |
|-------------|---------|-----------------------------------------------------------------------------------------|-----------|
| 205963_s_at | DNAJA3  | DnaJ (Hsp40) homolog,<br>subfamily A, member 3                                          | 1.44      |
| 205970_at   | MT3     | metallothionein 3                                                                       | -<br>1.71 |
| 205985_x_at | CLCNKB  | chloride channel Kb                                                                     | -<br>1.39 |
| 205992_s_at | IL15    | interleukin 15                                                                          | 1.58      |
| 206011_at   | CASP1   | caspase 1, apoptosis-related<br>cysteine peptidase (interleukin 1,<br>beta, convertase) | 1.77      |
| 206014_at   | ACTL6B  | actin-like 6B                                                                           | -<br>1.65 |
| 206029_at   | ANKRD1  | ankyrin repeat domain 1 (cardiac<br>muscle)                                             | -<br>1.14 |
| 206042_x_at | SNURF   | SNRPN upstream reading frame                                                            | 1.95      |
| 206075_s_at | CSNK2A1 | casein kinase 2, alpha 1<br>polypeptide                                                 | 1.63      |

|             |        |                                                                                               |           |
|-------------|--------|-----------------------------------------------------------------------------------------------|-----------|
| 206095_s_at | FUSIP1 | FUS interacting protein<br>(serine/arginine-rich) 1                                           | 1.88      |
| 206103_at   | RAC3   | ras-related C3 botulinum toxin<br>substrate 3 (rho family, small<br>GTP binding protein Rac3) | -<br>1.45 |
| 206113_s_at | RAB5A  | RAB5A, member RAS<br>oncogene family                                                          | 1.89      |
| 206123_at   | LLGL1  | lethal giant larvae homolog 1<br>(Drosophila)                                                 | -<br>2.18 |
| 206136_at   | FZD5   | frizzled homolog 5 (Drosophila)                                                               | -<br>1.75 |
| 206147_x_at | SCML2  | sex comb on midleg-like 2<br>(Drosophila)                                                     | 1.52      |
| 206148_at   | IL3RA  | interleukin 3 receptor, alpha                                                                 | -         |

|             |        |                                                                |           |
|-------------|--------|----------------------------------------------------------------|-----------|
|             |        | (low affinity)                                                 | 1.41      |
| 206169_x_at | ZC3H7B | zinc finger CCCH-type<br>containing 7B                         | -<br>2.33 |
| 206209_s_at | CA4    | carbonic anhydrase IV                                          | -<br>1.41 |
| 206246_at   | PFKFB4 | 6-phosphofructo-2-<br>kinase/fructose-2,6-<br>biphosphatase 4  | -<br>1.35 |
| 206248_at   | PRKCE  | protein kinase C, epsilon                                      | -<br>1.39 |
| 206250_x_at | AVPR1A | arginine vasopressin receptor 1A                               | -<br>1.48 |
| 206291_at   | NTS    | neurotensin                                                    | 1.83      |
| 206302_s_at | NUDT4  | nudix (nucleoside diphosphate<br>linked moiety X)-type motif 4 | 1.88      |
| 206315_at   | CRLF1  | cytokine receptor-like factor 1                                | -<br>1.59 |

|             |         |                                                                                                       |           |
|-------------|---------|-------------------------------------------------------------------------------------------------------|-----------|
| 206332_s_at | IFI16   | interferon, gamma-inducible protein 16                                                                | 2.07      |
| 206340_at   | NR1H4   | nuclear receptor subfamily 1, group H, member 4                                                       | 1.92      |
| 206348_s_at | PDK3    | pyruvate dehydrogenase kinase, isozyme 3                                                              | 1.22      |
| 206356_s_at | GNAL    | guanine nucleotide binding protein (G protein), alpha activating activity polypeptide, olfactory type | -1.2      |
| 206366_x_at | XCL1    | chemokine (C motif) ligand 1                                                                          | 1.77      |
| 206384_at   | CACNG3  | calcium channel, voltage-dependent, gamma subunit 3                                                   | -<br>1.58 |
| 206399_x_at | CACNA1A | calcium channel, voltage-dependent, P/Q type, alpha 1A subunit                                        | -<br>2.26 |

|             |        |                                                                              |           |
|-------------|--------|------------------------------------------------------------------------------|-----------|
| 206445_s_at | PRMT1  | protein arginine<br>methyltransferase 1                                      | 1.68      |
| 206470_at   | PLXNC1 | plexin C1                                                                    | 1.18      |
| 206491_s_at | NAPA   | N-ethylmaleimide-sensitive<br>factor attachment protein, alpha               | 2.42      |
| 206509_at   | PIP    | prolactin-induced protein                                                    | -<br>1.39 |
| 206512_at   | ZRSR1  | zinc finger (CCCH type), RNA-<br>binding motif and<br>serine/arginine rich 1 | -<br>1.24 |
| 206563_s_at | OPRL1  | opiate receptor-like 1                                                       | -<br>1.57 |
| 206564_at   | OPRL1  | opiate receptor-like 1                                                       | -<br>1.62 |
| 206573_at   | KCNQ3  | potassium voltage-gated<br>channel, KQT-like subfamily,<br>member 3          | -<br>1.49 |

|             |        |                                                       |      |
|-------------|--------|-------------------------------------------------------|------|
| 206592_s_at | AP3D1  | adaptor-related protein complex<br>3, delta 1 subunit | 1.62 |
| 206614_at   | GDF5   | growth differentiation factor 5                       | 1.39 |
| 206617_s_at | RENBP  | renin binding protein                                 | 1.55 |
| 206621_s_at | EIF4H  | eukaryotic translation initiation<br>factor 4H        | 1.52 |
| 206631_at   | PTGER2 | prostaglandin E receptor 2<br>(subtype EP2), 53kDa    | 1.37 |
| 206666_at   | GZMK   | granzyme K (granzyme 3;<br>tryptase II)               | 2.95 |
| 206668_s_at | SCAMP1 | secretory carrier membrane<br>protein 1               | 1.74 |
| 206672_at   | AQP2   | aquaporin 2 (collecting duct)                         | 1.73 |
| 206681_x_at | GP2    | glycoprotein 2 (zymogen<br>granule membrane)          | 1.39 |

|             |        |                                                                  |           |
|-------------|--------|------------------------------------------------------------------|-----------|
| 206689_x_at | HTATIP | HIV-1 Tat interacting protein,<br>60kDa                          | 1.54      |
| 206696_at   | GPR143 | G protein-coupled receptor 143                                   | -<br>1.43 |
| 206746_at   | BFSP1  | beaded filament structural<br>protein 1, filensin                | -1.4      |
| 206747_at   | GPRIN2 | G protein regulated inducer of<br>neurite outgrowth 2            | -<br>1.34 |
| 206756_at   | CHST7  | carbohydrate (N-<br>acetylglucosamine 6-O)<br>sulfotransferase 7 | 1.87      |
| 206768_at   | RPL3L  | ribosomal protein L3-like                                        | -<br>1.34 |
| 206769_at   | TMSB4Y | thymosin, beta 4, Y-linked                                       | -<br>1.33 |
| 206778_at   | CRYBB2 | crystallin, beta B2                                              | -<br>1.57 |
| 206781_at   | DNAJC4 | DnaJ (Hsp40) homolog,<br>subfamily C, member 4                   | -<br>1.79 |

|             |         |                                                          |           |
|-------------|---------|----------------------------------------------------------|-----------|
|             |         |                                                          | -         |
| 206789_s_at | POU2F1  | POU class 2 homeobox 1                                   | 1.56      |
| 206813_at   | CTF1    | cardiotrophin 1                                          | 1.49      |
|             |         |                                                          | -         |
| 206815_at   | SPAG8   | sperm associated antigen 8                               | 1.89      |
|             |         |                                                          | -         |
| 206821_x_at | HRBL    | HIV-1 Rev binding protein-like                           | 1.28      |
|             |         |                                                          |           |
| 206833_s_at | ACYP2   | acylphosphatase 2, muscle type                           | 1.93      |
| 206855_s_at | HYAL2   | hyaluronoglucosaminidase 2                               | 1.89      |
|             |         |                                                          |           |
| 206892_at   | AMHR2   | anti-Mullerian hormone<br>receptor, type II              | -1.5      |
|             |         |                                                          |           |
| 206897_at   | PAGE1   | P antigen family, member 1<br>(prostate associated)      | -<br>1.46 |
| 206953_s_at | LPHN2   | latrophilin 2                                            | 1.91      |
|             |         |                                                          |           |
| 207035_at   | SLC30A3 | solute carrier family 30 (zinc<br>transporter), member 3 | -<br>1.44 |
| 207047_s_at | CLCNKA  | chloride channel Ka                                      | -         |



|             |          |                                                                                         |           |
|-------------|----------|-----------------------------------------------------------------------------------------|-----------|
|             |          |                                                                                         | 1.42      |
| 207055_at   | GPR37L1  | G protein-coupled receptor 37<br>like 1                                                 | -<br>1.61 |
| 207079_s_at | MED6     | mediator complex subunit 6                                                              | 2.19      |
| 207088_s_at | SLC25A11 | solute carrier family 25<br>(mitochondrial carrier;<br>oxoglutarate carrier), member 11 | 1.67      |
| 207124_s_at | GNB5     | guanine nucleotide binding<br>protein (G protein), beta 5                               | 1.85      |
| 207132_x_at | PFDN5    | prefoldin subunit 5                                                                     | 1.61      |
| 207136_at   | ARR3     | arrestin 3, retinal (X-arrestin)                                                        | -<br>1.48 |
| 207138_at   | PHF2     | PHD finger protein 2                                                                    | -<br>1.46 |
| 207143_at   | CDK6     | cyclin-dependent kinase 6                                                               | -<br>1.57 |

|             |           |                                                                        |           |
|-------------|-----------|------------------------------------------------------------------------|-----------|
| 207151_at   | ADCYAP1R1 | adenylate cyclase activating polypeptide 1 (pituitary) receptor type I | -<br>1.23 |
| 207159_x_at | CRTC1     | CREB regulated transcription coactivator 1                             | -<br>1.47 |
| 207163_s_at | AKT1      | v-akt murine thymoma viral oncogene homolog 1                          | 1.48      |
| 207168_s_at | H2AFY     | H2A histone family, member Y                                           | 1.53      |
| 207180_s_at | HTATIP2   | HIV-1 Tat interactive protein 2, 30kDa                                 | 1.82      |
| 207189_s_at | ZZEF1     | zinc finger, ZZ-type with EF-hand domain 1                             | -<br>1.26 |
| 207199_at   | TERT      | telomerase reverse transcriptase                                       | -<br>1.65 |
| 207209_at   | CETN1     | centrin, EF-hand protein, 1                                            | -<br>1.67 |
| 207217_s_at | NOX1      | NADPH oxidase 1                                                        | -         |

|             |          |                                                                                         |           |
|-------------|----------|-----------------------------------------------------------------------------------------|-----------|
|             |          |                                                                                         | 1.31      |
| 207222_at   | PLA2G10  | phospholipase A2, group X                                                               | -<br>1.41 |
| 207238_s_at | PTPRC    | protein tyrosine phosphatase,<br>receptor type, C                                       | 2.56      |
| 207259_at   | C17orf73 | chromosome 17 open reading<br>frame 73                                                  | -<br>1.16 |
| 207266_x_at | RBMS1    | RNA binding motif, single<br>stranded interacting protein 1                             | 2         |
| 207314_x_at | KIR3DL2  | killer cell immunoglobulin-like<br>receptor, three domains, long<br>cytoplasmic tail, 2 | -<br>1.45 |
| 207317_s_at | CASQ2    | calsequestrin 2 (cardiac muscle)                                                        | -1.5      |
| 207321_s_at | ABCB9    | ATP-binding cassette, sub-<br>family B (MDR/TAP), member<br>9                           | -<br>1.36 |
| 207323_s_at | MBP      | myelin basic protein                                                                    | -         |

|             |        |                                                                                 |           |
|-------------|--------|---------------------------------------------------------------------------------|-----------|
|             |        |                                                                                 | 1.67      |
| 207327_at   | EYA4   | eyes absent homolog 4<br>(Drosophila)                                           | -<br>1.26 |
| 207338_s_at | ZNF200 | zinc finger protein 200                                                         | 1.56      |
| 207352_s_at | GABRB2 | gamma-aminobutyric acid<br>(GABA) A receptor, beta 2                            | -<br>1.61 |
| 207356_at   | DEFB4  | defensin, beta 4                                                                | -1.7      |
| 207361_at   | HBP1   | HMG-box transcription factor 1                                                  | 1.21      |
| 207366_at   | KCNS1  | potassium voltage-gated<br>channel, delayed-rectifier,<br>subfamily S, member 1 | -<br>1.84 |
| 207387_s_at | GK     | glycerol kinase                                                                 | 3.02      |

|             |          |                                                                                                 |           |
|-------------|----------|-------------------------------------------------------------------------------------------------|-----------|
| 207396_s_at | ALG3     | asparagine-linked glycosylation<br>3 homolog (S. cerevisiae, alpha-<br>1,3-mannosyltransferase) | 1.73      |
| 207413_s_at | SCN5A    | sodium channel, voltage-gated,<br>type V, alpha subunit                                         | -<br>1.72 |
| 207438_s_at | SNUPN    | snurportin 1                                                                                    | 1.43      |
| 207439_s_at | SLC35A2  | solute carrier family 35 (UDP-<br>galactose transporter), member<br>A2                          | 1.36      |
| 207451_at   | NKX2-8   | NK2 homeobox 8                                                                                  | -<br>1.58 |
| 207462_at   | GLRA2    | glycine receptor, alpha 2                                                                       | -<br>1.59 |
| 207475_at   | FABP2    | fatty acid binding protein 2,<br>intestinal                                                     | 1.25      |
| 207487_at   | FLJ11996 | hypothetical protein FLJ11996                                                                   | 1.14      |

|             |         |                                                                                                   |           |
|-------------|---------|---------------------------------------------------------------------------------------------------|-----------|
| 207490_at   | TUBA4B  | tubulin, alpha 4b (pseudogene)                                                                    | -<br>1.52 |
| 207503_at   | TCP10   | t-complex 10 (mouse)                                                                              | -<br>1.32 |
| 207504_at   | CA7     | carbonic anhydrase VII                                                                            | -<br>1.35 |
| 207511_s_at | C2orf24 | chromosome 2 open reading<br>frame 24                                                             | -<br>1.56 |
| 207517_at   | LAMC2   | laminin, gamma 2                                                                                  | -<br>1.29 |
| 207552_at   | ATP5G2  | ATP synthase, H <sup>+</sup> transporting,<br>mitochondrial F0 complex,<br>subunit C2 (subunit 9) | -<br>1.45 |
| 207557_s_at | RYR2    | ryanodine receptor 2 (cardiac)                                                                    | -<br>1.32 |
| 207576_x_at | OXT     | oxytocin, prepro- (neurophysin<br>I)                                                              | -<br>2.06 |
| 207581_s_at | MAGEB4  | melanoma antigen family B, 4                                                                      | -1.2      |

|             |          |                                                                      |           |
|-------------|----------|----------------------------------------------------------------------|-----------|
| 207615_s_at | C16orf3  | chromosome 16 open reading<br>frame 3                                | -<br>1.37 |
| 207618_s_at | BCS1L    | BCS1-like (yeast)                                                    | 1.35      |
| 207627_s_at | TFCP2    | transcription factor CP2                                             | 1.45      |
| 207640_x_at | NTN2L    | netrin 2-like (chicken)                                              | -<br>1.41 |
| 207643_s_at | TNFRSF1A | tumor necrosis factor receptor<br>superfamily, member 1A             | 1.53      |
| 207688_s_at | INHBC    | inhibin, beta C                                                      | 2.15      |
| 207736_s_at | TNP2     | transition protein 2 (during<br>histone to protamine<br>replacement) | -<br>1.33 |
| 207748_at   |          | NA                                                                   | -1.3      |

|             |         |                                                                        |           |
|-------------|---------|------------------------------------------------------------------------|-----------|
| 207753_at   | ZNF304  | zinc finger protein 304                                                | 1.41      |
| 207755_at   |         | NA                                                                     | -<br>1.37 |
| 207758_at   | PPM1F   | protein phosphatase 1F (PP2C domain containing)                        | -<br>1.96 |
| 207771_at   | SLC5A2  | solute carrier family 5 (sodium/glucose cotransporter), member 2       | -<br>1.34 |
| 207826_s_at | ID3     | inhibitor of DNA binding 3, dominant negative helix-loop-helix protein | 1.97      |
| 207834_at   | FBLN1   | fibulin 1                                                              | -<br>1.47 |
| 207845_s_at | ANAPC10 | anaphase promoting complex subunit 10                                  | 1.72      |
| 207847_s_at | MUC1    | mucin 1, cell surface associated                                       | -<br>1.69 |



|             |        |                                                                 |           |
|-------------|--------|-----------------------------------------------------------------|-----------|
| 207861_at   | CCL22  | chemokine (C-C motif) ligand<br>22                              | -<br>1.41 |
| 207911_s_at | TGM5   | transglutaminase 5                                              | -<br>1.41 |
| 207914_x_at | EVX1   | even-skipped homeobox 1                                         | -<br>2.68 |
| 207919_at   | ART1   | ADP-ribosyltransferase 1                                        | -<br>1.53 |
| 207945_s_at | CSNK1D | casein kinase 1, delta                                          | -<br>1.85 |
| 207949_s_at | ICA1   | islet cell autoantigen 1, 69kDa                                 | -<br>1.91 |
| 207957_s_at | PRKCB1 | protein kinase C, beta 1                                        | -<br>1.48 |
| 207967_at   | VPS45  | vacuolar protein sorting 45<br>homolog ( <i>S. cerevisiae</i> ) | -<br>1.46 |
| 207971_s_at | CEP68  | centrosomal protein 68kDa                                       | -<br>1.26 |
| 207993_s_at | CHP    | calcium binding protein P22                                     | -<br>2.16 |
| 208007_at   |        | NA                                                              | -<br>1.57 |

|             |         |                                                                   |           |
|-------------|---------|-------------------------------------------------------------------|-----------|
| 208016_s_at | AGTR1   | angiotensin II receptor, type 1                                   | 2.57      |
| 208021_s_at | RFC1    | replication factor C (activator 1)<br>1, 145kDa                   | 1.5       |
| 208031_s_at | RFX2    | regulatory factor X, 2<br>(influences HLA class II<br>expression) | -<br>1.95 |
| 208037_s_at | MADCAM1 | mucosal vascular addressin cell<br>adhesion molecule 1            | -<br>1.83 |
| 208040_s_at | MYBPC3  | myosin binding protein C,<br>cardiac                              | -<br>1.66 |
| 208055_s_at | HERC4   | hect domain and RLD 4                                             | 1.26      |
| 208057_s_at | GLI2    | GLI-Kruppel family member<br>GLI2                                 | -<br>1.35 |
| 208066_s_at | GTF2B   | general transcription factor IIB                                  | 1.89      |
| 208072_s_at | DGKD    | diacylglycerol kinase, delta<br>130kDa                            | -<br>1.33 |

|             |         |                                                                              |           |
|-------------|---------|------------------------------------------------------------------------------|-----------|
| 208084_at   | ITGB6   | integrin, beta 6                                                             | -<br>1.27 |
| 208090_s_at | AIRE    | autoimmune regulator                                                         | -<br>1.58 |
| 208111_at   | AVPR2   | arginine vasopressin receptor 2<br>(nephrogenic diabetes insipidus)          | -<br>1.75 |
| 208131_s_at | PTGIS   | prostaglandin I2 (prostacyclin)<br>synthase                                  | 2.17      |
| 208135_at   | TCF2    | transcription factor 2, hepatic;<br>LF-B3; variant hepatic nuclear<br>factor | -<br>1.42 |
| 208141_s_at | DOHH    | deoxyhypusine<br>hydroxylase/monooxygenase                                   | -<br>1.77 |
| 208158_s_at | OSBPL1A | oxysterol binding protein-like<br>1A                                         | 1.7       |
| 208188_at   | KRT9    | keratin 9 (epidermolytic<br>palmoplantar keratoderma)                        | -<br>1.63 |

|             |         |                                                                       |           |
|-------------|---------|-----------------------------------------------------------------------|-----------|
| 208219_at   | ACVR1B  | activin A receptor, type IB                                           | -<br>1.28 |
| 208221_s_at | SLIT1   | slit homolog 1 (Drosophila)                                           | -<br>1.34 |
| 208247_at   | C3orf51 | chromosome 3 open reading<br>frame 51                                 | -<br>1.79 |
| 208258_s_at | GAS2L1  | growth arrest-specific 2 like 1                                       | -<br>1.98 |
| 208269_s_at | ADAM28  | ADAM metallopeptidase<br>domain 28                                    | -<br>1.52 |
| 208292_at   | BMP10   | bone morphogenetic protein 10                                         | -<br>1.41 |
| 208309_s_at | MALT1   | mucosa associated lymphoid<br>tissue lymphoma translocation<br>gene 1 | 1.62      |
| 208336_s_at | GPSN2   | glycoprotein, synaptic 2                                              | 1.49      |
| 208371_s_at | RING1   | ring finger protein 1                                                 | 2.06      |

|             |         |                                                              |           |
|-------------|---------|--------------------------------------------------------------|-----------|
| 208377_s_at | CACNA1F | calcium channel, voltage-dependent, L type, alpha 1F subunit | -<br>1.63 |
| 208397_x_at | KCNJ5   | potassium inwardly-rectifying channel, subfamily J, member 5 | -<br>1.54 |
| 208407_s_at | CTNND1  | catenin (cadherin-associated protein), delta 1               | 1.66      |
| 208430_s_at | DTNA    | dystrobrevin, alpha                                          | -1.2      |
| 208447_s_at | PRPS1   | phosphoribosyl pyrophosphate synthetase 1                    | 1.52      |
| 208453_s_at | XPNPEP1 | X-prolyl aminopeptidase (aminopeptidase P) 1, soluble        | 1.68      |
| 208456_s_at | RRAS2   | related RAS viral (r-ras) oncogene homolog 2                 | 1.53      |
| 208481_at   | ASB4    | ankyrin repeat and SOCS box-containing 4                     | -<br>1.17 |

|             |           |                                                                                           |           |
|-------------|-----------|-------------------------------------------------------------------------------------------|-----------|
| 208483_x_at | KRT33A    | keratin 33A                                                                               | -<br>1.37 |
| 208517_x_at | BTF3      | basic transcription factor 3                                                              | 1.78      |
| 208527_x_at | HIST1H2BE | histone cluster 1, H2be                                                                   | 2.1       |
| 208529_at   | BTF3L1    | basic transcription factor 3, like<br>1                                                   | -<br>1.51 |
| 208531_at   | SERPINA2  | serpin peptidase inhibitor, clade<br>A (alpha-1 antiproteinase,<br>antitrypsin), member 2 | -1.2      |
| 208552_at   | GRIK4     | glutamate receptor, ionotropic,<br>kainate 4                                              | -<br>1.28 |
| 208554_at   | POU4F3    | POU class 4 homeobox 3                                                                    | -<br>1.23 |
| 208573_s_at | OR2H2     | olfactory receptor, family 2,<br>subfamily H, member 2                                    | -<br>1.64 |
| 208578_at   | SCN10A    | sodium channel, voltage-gated,<br>type X, alpha subunit                                   | -<br>1.27 |

|             |       |                                                                       |           |
|-------------|-------|-----------------------------------------------------------------------|-----------|
| 208579_x_at | H2BFS | H2B histone family, member S                                          | 2.79      |
| 208582_s_at | DUX3  | double homeobox, 3                                                    | -<br>1.51 |
| 208587_s_at | OR1E2 | olfactory receptor, family 1,<br>subfamily E, member 2                | -<br>1.24 |
| 208588_at   | FKSG2 | apoptosis inhibitor                                                   | -<br>1.39 |
| 208620_at   | PCBP1 | poly(rC) binding protein 1                                            | 1.66      |
| 208621_s_at | VIL2  | villin 2 (ezrin)                                                      | 1.79      |
| 208622_s_at | VIL2  | villin 2 (ezrin)                                                      | 1.62      |
| 208628_s_at | YBX1  | Y box binding protein 1                                               | 1.65      |
| 208668_x_at | HMGN2 | high-mobility group<br>nucleosomal binding domain 2                   | 1.36      |
| 208675_s_at | DDOST | dolichyl-<br>diphosphooligosaccharide-<br>protein glycosyltransferase | 1.82      |
| 208677_s_at | BSG   | basigin (Ok blood group)                                              | 2.17      |

|             |          |                                                                     |      |
|-------------|----------|---------------------------------------------------------------------|------|
| 208679_s_at | ARPC2    | actin related protein 2/3 complex, subunit 2, 34kDa                 | 1.64 |
| 208686_s_at | BRD2     | bromodomain containing 2                                            | 1.85 |
| 208699_x_at | TKT      | transketolase (Wernicke-Korsakoff syndrome)                         | 1.93 |
| 208702_x_at | APLP2    | amyloid beta (A4) precursor-like protein 2                          | 1.72 |
| 208717_at   | OXA1L    | oxidase (cytochrome c) assembly 1-like                              | 1.65 |
| 208726_s_at | EIF2S2   | eukaryotic translation initiation factor 2, subunit 2 beta, 38kDa   | 1.87 |
| 208737_at   | ATP6V1G1 | ATPase, H <sup>+</sup> transporting, lysosomal 13kDa, V1 subunit G1 | 1.35 |
| 208748_s_at | FLOT1    | flotillin 1                                                         | 1.22 |



|             |        |                                                             |      |
|-------------|--------|-------------------------------------------------------------|------|
| 208750_s_at | ARF1   | ADP-ribosylation factor 1                                   | 2.47 |
| 208751_at   | NAPA   | N-ethylmaleimide-sensitive factor attachment protein, alpha | 2.04 |
| 208755_x_at | H3F3A  | H3 histone, family 3A                                       | 1.52 |
| 208777_s_at | PSMD11 | proteasome (prosome, macropain) 26S subunit, non-ATPase, 11 | 1.57 |
| 208781_x_at | SNX3   | sorting nexin 3                                             | 1.44 |
| 208785_s_at | KRTHB5 | keratin, hair, basic, 5                                     | 1.59 |
| 208787_at   | MRPL3  | mitochondrial ribosomal protein L3                          | 1.74 |
| 208800_at   | SRP72  | signal recognition particle 72kDa                           | 1.97 |

|             |        |                                                              |      |
|-------------|--------|--------------------------------------------------------------|------|
| 208805_at   | PSMA6  | proteasome (prosome,<br>macropain) subunit, alpha type,<br>6 | 1.51 |
| 208812_x_at | HLA-C  | major histocompatibility<br>complex, class I, C              | 1.83 |
| 208819_at   | RAB8A  | RAB8A, member RAS<br>oncogene family                         | 1.86 |
| 208832_at   | ATXN10 | ataxin 10                                                    | 1.3  |
| 208846_s_at | VDAC3  | voltage-dependent anion channel<br>3                         | 1.92 |
| 208851_s_at | THY1   | Thy-1 cell surface antigen                                   | -    |

|             |         |                                                                             |           |
|-------------|---------|-----------------------------------------------------------------------------|-----------|
|             |         |                                                                             | 1.75      |
| 208854_s_at | STK24   | serine/threonine kinase 24<br>(STE20 homolog, yeast)                        | 2.19      |
| 208887_at   | EIF3G   | eukaryotic translation initiation<br>factor 3, subunit G                    | 1.51      |
| 208890_s_at | PLXNB2  | plexin B2                                                                   | 1.84      |
| 208907_s_at | MRPS18B | mitochondrial ribosomal protein<br>S18B                                     | 1.94      |
| 208915_s_at | GGA2    | golgi associated, gamma adaptin<br>ear containing, ARF binding<br>protein 2 | -<br>1.37 |
| 208922_s_at | NXF1    | nuclear RNA export factor 1                                                 | 2.05      |
| 208926_at   | NEU1    | sialidase 1 (lysosomal sialidase)                                           | 1.98      |
| 208934_s_at | LGALS8  | lectin, galactoside-binding,                                                | 1.96      |

|             |        |                                                                               |      |
|-------------|--------|-------------------------------------------------------------------------------|------|
|             |        | soluble, 8 (galectin 8)                                                       |      |
| 208937_s_at | ID1    | inhibitor of DNA binding 1,<br>dominant negative helix-loop-<br>helix protein | 3.43 |
| 208952_s_at | LARP5  | La ribonucleoprotein domain<br>family, member 5                               | 1.52 |
| 208953_at   | LARP5  | La ribonucleoprotein domain<br>family, member 5                               | 1.74 |
| 208959_s_at | TXNDC4 | thioredoxin domain containing 4<br>(endoplasmic reticulum)                    | 1.5  |
| 208966_x_at | IFI16  | interferon, gamma-inducible<br>protein 16                                     | 2.16 |
| 208967_s_at | AK2    | adenylate kinase 2                                                            | 1.56 |
| 208971_at   | UROD   | uroporphyrinogen decarboxylase                                                | 1.44 |

|             |           |                                                         |      |
|-------------|-----------|---------------------------------------------------------|------|
| 208973_at   | PRNPIP    | prion protein interacting protein                       | 1.31 |
| 208996_s_at | POLR2C    | polymerase (RNA) II (DNA directed) polypeptide C, 33kDa | 1.86 |
| 208998_at   | UCP2      | uncoupling protein 2 (mitochondrial, proton carrier)    | 2.25 |
| 209006_s_at | C1orf63   | chromosome 1 open reading frame 63                      | 2.96 |
| 209015_s_at | DNAJB6    | DnaJ (Hsp40) homolog, subfamily B, member 6             | 1.43 |
| 209020_at   | C20orf111 | chromosome 20 open reading frame 111                    | 1.76 |
| 209027_s_at | ABI1      | abl-interactor 1                                        | 2.2  |
| 209038_s_at | EHD1      | EH-domain containing 1                                  | 1.27 |

|             |           |                                                                                           |      |
|-------------|-----------|-------------------------------------------------------------------------------------------|------|
| 209040_s_at | PSMB8     | proteasome (prosome, macropain) subunit, beta type, 8 (large multifunctional peptidase 7) | 2.63 |
| 209046_s_at | GABARAPL2 | GABA(A) receptor-associated protein-like 2                                                | 1.47 |
| 209080_x_at | GLRX3     | glutaredoxin 3                                                                            | 2.16 |
| 209084_s_at | RFC1      | replication factor C (activator 1) 1, 145kDa                                              | 1.45 |
| 209102_s_at | HBP1      | HMG-box transcription factor 1                                                            | 1.75 |
| 209103_s_at | UFD1L     | ubiquitin fusion degradation 1 like (yeast)                                               | 1.48 |
| 209104_s_at | NOLA2     | nucleolar protein family A, member 2 (H/ACA small nucleolar RNPs)                         | 1.85 |
| 209112_at   | CDKN1B    | cyclin-dependent kinase inhibitor 1B (p27, Kip1)                                          | 1.63 |

|             |         |                                                                              |      |
|-------------|---------|------------------------------------------------------------------------------|------|
| 209124_at   | MYD88   | myeloid differentiation primary response gene (88)                           | 2.02 |
| 209132_s_at | COMMD4  | COMM domain containing 4                                                     | 1.41 |
| 209139_s_at | PRKRA   | protein kinase, interferon-inducible double stranded RNA dependent activator | 1.9  |
| 209142_s_at | UBE2G1  | ubiquitin-conjugating enzyme E2G 1 (UBC7 homolog, yeast)                     | 2.25 |
| 209152_s_at | TCF3    | transcription factor 3 (E2A immunoglobulin enhancer binding factors E12/E47) | 1.28 |
| 209156_s_at | COL6A2  | collagen, type VI, alpha 2                                                   | 3.1  |
| 209165_at   | AATF    | apoptosis antagonizing transcription factor                                  | 1.44 |
| 209177_at   | C3orf60 | chromosome 3 open reading frame 60                                           | 1.43 |

|             |        |                                                                            |           |
|-------------|--------|----------------------------------------------------------------------------|-----------|
| 209188_x_at | DR1    | down-regulator of transcription<br>1, TBP-binding (negative<br>cofactor 2) | 1.7       |
| 209192_x_at | HTATIP | HIV-1 Tat interacting protein,<br>60kDa                                    | 1.49      |
| 209206_at   | SEC22B | SEC22 vesicle trafficking<br>protein homolog B (S.<br>cerevisiae)          | 1.73      |
| 209207_s_at | SEC22B | SEC22 vesicle trafficking<br>protein homolog B (S.<br>cerevisiae)          | 1.5       |
| 209208_at   | MPDU1  | mannose-P-dolichol utilization<br>defect 1                                 | 1.52      |
| 209217_s_at | WDR45  | WD repeat domain 45                                                        | 1.57      |
| 209260_at   | SFN    | stratifin                                                                  | -<br>1.34 |
| 209265_s_at | METTL3 | methyltransferase like 3                                                   | 2.15      |



|             |           |                                                                                      |      |
|-------------|-----------|--------------------------------------------------------------------------------------|------|
| 209275_s_at | CLN3      | ceroid-lipofuscinosis, neuronal<br>3, juvenile (Batten, Spielmeier-<br>Vogt disease) | 1.44 |
| 209284_s_at | C3orf63   | chromosome 3 open reading<br>frame 63                                                | 1.78 |
| 209295_at   | TNFRSF10B | tumor necrosis factor receptor<br>superfamily, member 10b                            | 1.77 |
| 209302_at   | POLR2H    | polymerase (RNA) II (DNA<br>directed) polypeptide H                                  | 1.32 |
| 209329_x_at | HIGD2A    | HIG1 domain family, member<br>2A                                                     | 1.54 |
| 209331_s_at | MAX       | MYC associated factor X                                                              | 1.7  |
| 209338_at   | TFCP2     | transcription factor CP2                                                             | 1.32 |
| 209342_s_at | IKBKB     | inhibitor of kappa light<br>polypeptide gene enhancer in B-<br>cells, kinase beta    | 1.37 |

|             |         |                                                 |      |
|-------------|---------|-------------------------------------------------|------|
| 209344_at   | TPM4    | tropomyosin 4                                   | 1.97 |
| 209350_s_at | GPS2    | G protein pathway suppressor 2                  | 1.62 |
| 209361_s_at | PCBP4   | poly(rC) binding protein 4                      | 1.51 |
| 209362_at   | MED21   | mediator complex subunit 21                     | 1.96 |
| 209363_s_at | MED21   | mediator complex subunit 21                     | 1.69 |
| 209369_at   | ANXA3   | annexin A3                                      | 3.1  |
| 209397_at   | ME2     | malic enzyme 2, NAD(+)-dependent, mitochondrial | 2.29 |
| 209417_s_at | IFI35   | interferon-induced protein 35                   | 2.19 |
| 209432_s_at | CREB3   | cAMP responsive element binding protein 3       | 1.32 |
| 209441_at   | RHOBTB2 | Rho-related BTB domain containing 2             | -1.3 |
| 209445_x_at | C7orf44 | chromosome 7 open reading frame 44              | 1.96 |

|             |         |                                                                                                                                   |           |
|-------------|---------|-----------------------------------------------------------------------------------------------------------------------------------|-----------|
|             |         |                                                                                                                                   |           |
| 209449_at   | LSM2    | LSM2 homolog, U6 small nuclear RNA associated ( <i>S. cerevisiae</i> )                                                            | 1.45      |
| 209453_at   | SLC9A1  | solute carrier family 9 (sodium/hydrogen exchanger), member 1 (antiporter, Na <sup>+</sup> /H <sup>+</sup> , amiloride sensitive) | -<br>1.31 |
| 209488_s_at | RPMS    | RNA binding protein with multiple splicing                                                                                        | 2.02      |
| 209499_x_at | TNFSF13 | tumor necrosis factor (ligand) superfamily, member 13                                                                             | 1.64      |
| 209502_s_at | BAIAP2  | BAI1-associated protein 2                                                                                                         | -<br>1.44 |

|             |        |                                                                                                               |           |
|-------------|--------|---------------------------------------------------------------------------------------------------------------|-----------|
| 209509_s_at | DPAGT1 | dolichyl-phosphate (UDP-N-acetylglucosamine) N-acetylglucosaminephosphotransferase 1 (GlcNAc-1-P transferase) | 1.67      |
| 209511_at   | POLR2F | polymerase (RNA) II (DNA directed) polypeptide F                                                              | 1.67      |
| 209520_s_at | NCBP1  | nuclear cap binding protein subunit 1, 80kDa                                                                  | 1.37      |
| 209521_s_at | AMOT   | angiomin                                                                                                      | -<br>1.38 |
| 209529_at   | PPAP2C | phosphatidic acid phosphatase type 2C                                                                         | 1.5       |
| 209538_at   | ZNF32  | zinc finger protein 32                                                                                        | 1.92      |
| 209552_at   | PAX8   | paired box 8                                                                                                  | -<br>1.56 |
| 209557_s_at | NCDN   | neurochondrin                                                                                                 | -<br>1.42 |

|             |         |                                                                                 |      |
|-------------|---------|---------------------------------------------------------------------------------|------|
| 209565_at   | RNF113A | ring finger protein 113A                                                        | 1.65 |
| 209593_s_at | TOR1B   | torsin family 1, member B<br>(torsin B)                                         | 1.57 |
| 209605_at   | TST     | thiosulfate sulfurtransferase<br>(rhodanese)                                    | 1.59 |
| 209619_at   | CD74    | CD74 molecule, major<br>histocompatibility complex,<br>class II invariant chain | 2.46 |
| 209624_s_at | MCCC2   | methylcrotonoyl-Coenzyme A<br>carboxylase 2 (beta)                              | 1.49 |
| 209625_at   | PIGH    | phosphatidylinositol glycan<br>anchor biosynthesis, class H                     | 1.43 |
| 209630_s_at | FBXW2   | F-box and WD repeat domain<br>containing 2                                      | 1.71 |
| 209647_s_at | SOCS5   | suppressor of cytokine signaling<br>5                                           | 2    |

|             |        |                                                                              |      |
|-------------|--------|------------------------------------------------------------------------------|------|
| 209653_at   | KPNA4  | karyopherin alpha 4 (importin alpha 3)                                       | 1.59 |
| 209680_s_at | KIFC1  | kinesin family member C1                                                     | 1.38 |
| 209689_at   | CCDC93 | coiled-coil domain containing 93                                             | 1.28 |
| 209732_at   | CLEC2B | C-type lectin domain family 2, member B                                      | 2.47 |
| 209751_s_at | SEDLP  | spondyloepiphyseal dysplasia, late, pseudogene                               | 2.01 |
| 209754_s_at | TMPO   | thymopoietin                                                                 | 1.43 |
| 209756_s_at | MYCN   | v-myc myelocytomatosis viral related oncogene, neuroblastoma derived (avian) | 1.64 |

|             |        |                                                                              |           |
|-------------|--------|------------------------------------------------------------------------------|-----------|
| 209759_s_at | DCI    | dodecenoyl-Coenzyme A delta isomerase (3,2 trans-enoyl-Coenzyme A isomerase) | 1.73      |
| 209761_s_at | SP110  | SP110 nuclear body protein                                                   | 2.57      |
| 209770_at   | BTN3A1 | butyrophilin, subfamily 3, member A1                                         | 1.81      |
| 209783_at   | DBP    | D site of albumin promoter (albumin D-box) binding protein                   | -<br>2.61 |
| 209784_s_at | JAG2   | jagged 2                                                                     | -<br>1.54 |
| 209799_at   | PRKAA1 | protein kinase, AMP-activated, alpha 1 catalytic subunit                     | 1.57      |
| 209807_s_at | NFIX   | nuclear factor I/X (CCAAT-binding transcription factor)                      | -<br>1.38 |

|             |       |                                                                                                                                 |           |
|-------------|-------|---------------------------------------------------------------------------------------------------------------------------------|-----------|
| 209812_x_at | CASP2 | caspase 2, apoptosis-related<br>cysteine peptidase (neural<br>precursor cell expressed,<br>developmentally down-regulated<br>2) | -<br>1.42 |
| 209842_at   | SOX10 | SRY (sex determining region<br>Y)-box 10                                                                                        | -<br>1.48 |
| 209853_s_at | PSME3 | proteasome (prosome,<br>macropain) activator subunit 3<br>(PA28 gamma; Ki)                                                      | 1.5       |
| 209855_s_at | KLK2  | kallikrein-related peptidase 2                                                                                                  | -1.7      |
| 209882_at   | RIT1  | Ras-like without CAAX 1                                                                                                         | 1.45      |
| 209899_s_at | PUF60 | poly-U binding splicing factor<br>60KDa                                                                                         | 1.37      |
| 209907_s_at | ITSN2 | intersectin 2                                                                                                                   | 1.66      |
| 210012_s_at | EWSR1 | Ewing sarcoma breakpoint                                                                                                        | 1.26      |



|             |         |                                                                       |           |
|-------------|---------|-----------------------------------------------------------------------|-----------|
|             |         | region 1                                                              |           |
| 210018_x_at | MALT1   | mucosa associated lymphoid<br>tissue lymphoma translocation<br>gene 1 | 1.65      |
| 210020_x_at | CALML3  | calmodulin-like 3                                                     | -<br>1.62 |
| 210028_s_at | ORC3L   | origin recognition complex,<br>subunit 3-like (yeast)                 | 1.66      |
| 210060_at   | PDE6G   | phosphodiesterase 6G, cGMP-<br>specific, rod, gamma                   | -<br>1.71 |
| 210089_s_at | LAMA4   | laminin, alpha 4                                                      | -<br>1.81 |
| 210097_s_at | NOL7    | nucleolar protein 7, 27kDa                                            | 2.08      |
| 210101_x_at | SH3GLB1 | SH3-domain GRB2-like<br>endophilin B1                                 | 1.88      |
| 210104_at   | MED6    | mediator complex subunit 6                                            | 1.38      |
| 210113_s_at | NLRP1   | NLR family, pyrin domain<br>containing 1                              | -<br>1.46 |

|             |        |                                                                           |           |
|-------------|--------|---------------------------------------------------------------------------|-----------|
| 210120_s_at | RANBP3 | RAN binding protein 3                                                     | 1.36      |
| 210126_at   | PSG9   | pregnancy specific beta-1-glycoprotein 9                                  | -<br>1.65 |
| 210127_at   | RAB6B  | RAB6B, member RAS oncogene family                                         | -<br>1.27 |
| 210128_s_at | LTB4R  | leukotriene B4 receptor                                                   | -<br>1.48 |
| 210137_s_at | DCTD   | dCMP deaminase                                                            | 1.81      |
| 210140_at   | CST7   | cystatin F (leukocystatin)                                                | 1.94      |
| 210154_at   | ME2    | malic enzyme 2, NAD(+)-dependent, mitochondrial                           | 1.65      |
| 210162_s_at | NFATC1 | nuclear factor of activated T-cells, cytoplasmic, calcineurin-dependent 1 | 1.66      |
| 210178_x_at | FUSIP1 | FUS interacting protein                                                   | 2.57      |

|             |        |                                                        |           |
|-------------|--------|--------------------------------------------------------|-----------|
|             |        | (serine/arginine-rich) 1                               |           |
| 210182_at   | CORT   | cortistatin                                            | -<br>2.11 |
| 210185_at   | CACNB1 | calcium channel, voltage-<br>dependent, beta 1 subunit | -<br>1.56 |
| 210191_s_at | PHTF1  | putative homeodomain<br>transcription factor 1         | 1.3       |
| 210200_at   | WWP2   | WW domain containing E3<br>ubiquitin protein ligase 2  | -<br>1.41 |
| 210208_x_at | BAT3   | HLA-B associated transcript 3                          | 1.38      |
| 210226_at   | NR4A1  | nuclear receptor subfamily 4,<br>group A, member 1     | -<br>1.54 |

|             |        |                                                                                                           |           |
|-------------|--------|-----------------------------------------------------------------------------------------------------------|-----------|
| 210235_s_at | PPFIA1 | protein tyrosine phosphatase, receptor type, f polypeptide (PTPRF), interacting protein (liprin), alpha 1 | 1.35      |
| 210248_at   | WNT7A  | wingless-type MMTV integration site family, member 7A                                                     | -<br>1.44 |
| 210270_at   | RGS6   | regulator of G-protein signaling 6                                                                        | -<br>1.83 |
| 210276_s_at | TRIOBP | TRIO and F-actin binding protein                                                                          | 2         |
| 210287_s_at | FLT1   | fms-related tyrosine kinase 1 (vascular endothelial growth factor/vascular permeability factor receptor)  | -<br>1.35 |
| 210288_at   | KLRG1  | killer cell lectin-like receptor subfamily G, member 1                                                    | 1.23      |

|             |         |                                                                                                        |           |
|-------------|---------|--------------------------------------------------------------------------------------------------------|-----------|
| 210300_at   | REM1    | RAS (RAD and GEM)-like<br>GTP-binding 1                                                                | -<br>1.35 |
| 210312_s_at | IFT20   | intraflagellar transport 20<br>homolog (Chlamydomonas)                                                 | 1.43      |
| 210314_x_at | TNFSF13 | tumor necrosis factor (ligand)<br>superfamily, member 13                                               | 1.72      |
| 210315_at   | SYN2    | synapsin II                                                                                            | -<br>1.21 |
| 210316_at   | FLT4    | fms-related tyrosine kinase 4                                                                          | -<br>1.24 |
| 210317_s_at | YWHAE   | tyrosine 3-<br>monooxygenase/tryptophan 5-<br>monooxygenase activation<br>protein, epsilon polypeptide | 2.24      |
| 210329_s_at | SGCD    | sarcoglycan, delta (35kDa<br>dystrophin-associated<br>glycoprotein)                                    | -<br>1.56 |

|             |        |                                                    |           |
|-------------|--------|----------------------------------------------------|-----------|
|             |        |                                                    |           |
| 210337_s_at | ACLY   | ATP citrate lyase                                  | 1.74      |
| 210357_s_at | SMOX   | spermine oxidase                                   | -<br>1.58 |
| 210367_s_at | PTGES  | prostaglandin E synthase                           | -<br>1.49 |
| 210392_x_at | NR6A1  | nuclear receptor subfamily 6,<br>group A, member 1 | -<br>1.49 |
| 210406_s_at | RAB6C  | RAB6C, member RAS oncogene<br>family               | 1.49      |
| 210417_s_at | PI4KB  | phosphatidylinositol 4-kinase,<br>catalytic, beta  | 1.61      |
| 210419_at   | BARX2  | BARX homeobox 2                                    | -1.5      |
| 210431_at   | ALPPL2 | alkaline phosphatase, placental-<br>like 2         | -<br>1.62 |
| 210434_x_at | JTB    | jumping translocation breakpoint                   | 1.36      |

|             |         |                                                                   |           |
|-------------|---------|-------------------------------------------------------------------|-----------|
| 210442_at   | IL1RL1  | interleukin 1 receptor-like 1                                     | -<br>1.54 |
| 210449_x_at | MAPK14  | mitogen-activated protein kinase<br>14                            | 1.43      |
| 210459_at   | PSMD4   | proteasome (prosome,<br>macropain) 26S subunit, non-<br>ATPase, 4 | -<br>1.54 |
| 210476_s_at | PRLR    | prolactin receptor                                                | -<br>1.48 |
| 210480_s_at | MYO6    | myosin VI                                                         | 1.34      |
| 210487_at   | DNTT    | deoxynucleotidyltransferase,<br>terminal                          | -<br>1.37 |
| 210501_x_at | EIF3K   | eukaryotic translation initiation<br>factor 3, subunit K          | 1.47      |
| 210513_s_at | VEGFA   | vascular endothelial growth<br>factor A                           | 1.58      |
| 210541_s_at | TRIM27  | tripartite motif-containing 27                                    | 1.52      |
| 210569_s_at | SIGLEC9 | sialic acid binding Ig-like lectin<br>9                           | -<br>1.39 |

|             |              |                                                                        |      |
|-------------|--------------|------------------------------------------------------------------------|------|
| 210578_at   | TRIM10       | tripartite motif-containing 10                                         | 1.35 |
| 210588_x_at | HNRPH3       | heterogeneous nuclear<br>ribonucleoprotein H3 (2H9)                    | 1.62 |
| 210594_x_at | MPZL1        | myelin protein zero-like 1                                             | 1.29 |
| 210596_at   | RP11-217H1.1 | implantation-associated protein                                        | 1.94 |
| 210638_s_at | FBXO9        | F-box protein 9                                                        | 1.73 |
| 210639_s_at | ATG5         | ATG5 autophagy related 5<br>homolog ( <i>S. cerevisiae</i> )           | 1.49 |
| 210648_x_at | SNX3         | sorting nexin 3                                                        | 1.5  |
| 210717_at   |              | NA                                                                     | 1.45 |
| 210719_s_at | HMG20B       | high-mobility group 20B                                                | 2.13 |
| 210724_at   | EMR3         | egf-like module containing,<br>mucin-like, hormone receptor-<br>like 3 | -1.3 |
| 210732_s_at | LGALS8       | lectin, galactoside-binding,                                           | 1.89 |



|             |       |                                                              |           |
|-------------|-------|--------------------------------------------------------------|-----------|
|             |       | soluble, 8 (galectin 8)                                      |           |
| 210733_at   | TRAM1 | translocation associated<br>membrane protein 1               | 3.18      |
| 210734_x_at | MAX   | MYC associated factor X                                      | 1.52      |
| 210759_s_at | PSMA1 | proteasome (prosome,<br>macropain) subunit, alpha type,<br>1 | 2.41      |
| 210782_x_at | GRIN1 | glutamate receptor, ionotropic,<br>N-methyl D-aspartate 1    | -<br>1.61 |
| 210797_s_at | OASL  | 2'-5'-oligoadenylate synthetase-<br>like                     | 2.25      |
| 210799_at   | HTR1B | 5-hydroxytryptamine (serotonin)<br>receptor 1B               | -<br>1.52 |

|             |        |                                                                        |      |
|-------------|--------|------------------------------------------------------------------------|------|
| 210802_s_at | DIMT1L | DIM1 dimethyladenosine transferase 1-like ( <i>S. cerevisiae</i> )     | 1.79 |
| 210803_at   | TXNRD2 | thioredoxin reductase 2                                                | 1.31 |
| 210804_x_at | SLC8A1 | solute carrier family 8 (sodium/calcium exchanger), member 1           | 1.33 |
| 210812_at   | XRCC4  | X-ray repair complementing defective repair in Chinese hamster cells 4 | 1.39 |
| 210839_s_at | ENPP2  | ectonucleotide pyrophosphatase/phosphodiesterase 2 (autotaxin)         | 2.8  |
| 210865_at   | FASLG  | Fas ligand (TNF superfamily, member 6)                                 | 1.3  |
| 210867_at   | CNOT4  | CCR4-NOT transcription complex, subunit 4                              | 1.72 |

|             |         |                                                                   |           |
|-------------|---------|-------------------------------------------------------------------|-----------|
| 210883_x_at | EFNB3   | ephrin-B3                                                         | -<br>1.63 |
| 210884_s_at | SPAG11A | sperm associated antigen 11A                                      | -<br>1.54 |
| 210889_s_at | FCGR2B  | Fc fragment of IgG, low affinity<br>IIb, receptor (CD32)          | 2.3       |
| 210915_x_at | TRBC1   | T cell receptor beta constant 1                                   | 2.22      |
| 210936_at   | WDR1    | WD repeat domain 1                                                | -<br>1.17 |
| 210950_s_at | FDFT1   | farnesyl-diphosphate<br>farnesyltransferase 1                     | 2         |
| 211004_s_at | ALDH3B1 | aldehyde dehydrogenase 3<br>family, member B1                     | -1.5      |
| 211018_at   | LSS     | lanosterol synthase (2,3-<br>oxidosqualene-lanosterol<br>cyclase) | -<br>1.46 |
| 211021_s_at | RGS14   | regulator of G-protein signaling<br>14                            | -<br>1.77 |

|             |         |                                                                             |           |
|-------------|---------|-----------------------------------------------------------------------------|-----------|
| 211036_x_at | ANAPC5  | anaphase promoting complex<br>subunit 5                                     | 1.4       |
| 211038_s_at | CROCCL1 | ciliary rootlet coiled-coil,<br>rootletin-like 1                            | 1.83      |
| 211045_s_at | KCNH6   | potassium voltage-gated<br>channel, subfamily H (eag-<br>related), member 6 | -<br>1.38 |
| 211063_s_at | NCK1    | NCK adaptor protein 1                                                       | 1.9       |
| 211090_s_at | PRPF4B  | PRP4 pre-mRNA processing<br>factor 4 homolog B (yeast)                      | 1.94      |
| 211096_at   | PBX2    | pre-B-cell leukemia homeobox 2                                              | -<br>1.46 |
| 211112_at   | SLC12A4 | solute carrier family 12<br>(potassium/chloride<br>transporters), member 4  | -<br>1.82 |

|             |        |                                                                                                |           |
|-------------|--------|------------------------------------------------------------------------------------------------|-----------|
| 211116_at   | SLC9A2 | solute carrier family 9<br>(sodium/hydrogen exchanger),<br>member 2                            | -<br>1.37 |
| 211123_at   | SLC5A5 | solute carrier family 5 (sodium<br>iodide symporter), member 5                                 | -<br>1.57 |
| 211135_x_at | LILRB3 | leukocyte immunoglobulin-like<br>receptor, subfamily B (with TM<br>and ITIM domains), member 3 | -<br>1.54 |
| 211136_s_at | CLPTM1 | cleft lip and palate associated<br>transmembrane protein 1                                     | 1.77      |
| 211147_s_at | P2RXL1 | purinergic receptor P2X-like 1,<br>orphan receptor                                             | -<br>1.47 |
| 211185_s_at | HIATL1 | hippocampus abundant<br>transcript-like 1                                                      | 1.6       |

|             |        |                                                                         |           |
|-------------|--------|-------------------------------------------------------------------------|-----------|
| 211197_s_at | ICOSLG | inducible T-cell co-stimulator<br>ligand                                | -<br>1.33 |
| 211208_s_at | CASK   | calcium/calmodulin-dependent<br>serine protein kinase (MAGUK<br>family) | 1.48      |
| 211212_s_at | ORC5L  | origin recognition complex,<br>subunit 5-like (yeast)                   | 1.26      |
| 211222_s_at | HAPI   | huntingtin-associated protein 1<br>(neuroan 1)                          | -<br>1.89 |
| 211254_x_at | RHAG   | Rh-associated glycoprotein                                              | -<br>1.24 |
| 211261_at   | NUP214 | nucleoporin 214kDa                                                      | -<br>1.53 |
| 211263_s_at | PCSK6  | proprotein convertase<br>subtilisin/kexin type 6                        | -<br>1.47 |
| 211317_s_at | CFLAR  | CASP8 and FADD-like<br>apoptosis regulator                              | 2.31      |

|             |        |                                                                                         |           |
|-------------|--------|-----------------------------------------------------------------------------------------|-----------|
| 211337_s_at | 76P    | gamma tubulin ring complex<br>protein (76p gene)                                        | 1.37      |
| 211366_x_at | CASP1  | caspase 1, apoptosis-related<br>cysteine peptidase (interleukin 1,<br>beta, convertase) | 1.81      |
| 211367_s_at | CASP1  | caspase 1, apoptosis-related<br>cysteine peptidase (interleukin 1,<br>beta, convertase) | 2.04      |
| 211377_x_at | MYCN   | v-myc myelocytomatosis viral<br>related oncogene, neuroblastoma<br>derived (avian)      | -<br>1.35 |
| 211402_x_at | NR6A1  | nuclear receptor subfamily 6,<br>group A, member 1                                      | -<br>1.47 |
| 211405_x_at | IFNA17 | interferon, alpha 17                                                                    | -<br>1.65 |

|             |          |                                                                                  |           |
|-------------|----------|----------------------------------------------------------------------------------|-----------|
| 211410_x_at | KIR2DL5A | killer cell immunoglobulin-like receptor, two domains, long cytoplasmic tail, 5A | -<br>1.71 |
| 211438_at   | TRHR     | thyrotropin-releasing hormone receptor                                           | -<br>1.43 |
| 211439_at   | SFRS7    | splicing factor, arginine/serine-rich 7, 35kDa                                   | -<br>1.29 |
| 211446_at   | RGSL2    | regulator of G-protein signaling like 2                                          | -<br>1.31 |
| 211484_s_at | DSCAM    | Down syndrome cell adhesion molecule                                             | -<br>1.52 |
| 211488_s_at | ITGB8    | integrin, beta 8                                                                 | -<br>1.31 |
| 211520_s_at | GRIA1    | glutamate receptor, ionotropic, AMPA 1                                           | -<br>1.23 |
| 211530_x_at | HLA-G    | HLA-G histocompatibility antigen, class I, G                                     | 1.62      |



|             |          |                                                                         |           |
|-------------|----------|-------------------------------------------------------------------------|-----------|
| 211536_x_at | MAP3K7   | mitogen-activated protein kinase<br>kinase kinase 7                     | 1.51      |
| 211559_s_at | CCNG2    | cyclin G2                                                               | 1.61      |
| 211561_x_at | MAPK14   | mitogen-activated protein kinase<br>14                                  | 1.45      |
| 211574_s_at | CD46     | CD46 molecule, complement<br>regulatory protein                         | 1.62      |
| 211587_x_at | CHRNA3   | cholinergic receptor, nicotinic,<br>alpha 3                             | -<br>1.45 |
| 211631_x_at | B4GALT1  | UDP-Gal:betaGlcNAc beta 1,4-<br>galactosyltransferase,<br>polypeptide 1 | -<br>1.88 |
| 211633_x_at | IGHG1    | immunoglobulin heavy constant<br>gamma 1 (G1m marker)                   | 2.57      |
| 211634_x_at | IGHV1-69 | immunoglobulin heavy variable<br>1-69                                   | 4.63      |
| 211635_x_at | IGHV1-69 | immunoglobulin heavy variable<br>1-69                                   | 3.5       |

|             |           |                                                           |      |
|-------------|-----------|-----------------------------------------------------------|------|
| 211637_x_at | LOC652128 | similar to Ig heavy chain V-II<br>region ARH-77 precursor | 3.66 |
| 211639_x_at | SKAP2     | src kinase associated<br>phosphoprotein 2                 | 2.1  |
| 211640_x_at | IGHV1-69  | immunoglobulin heavy variable<br>1-69                     | 2.08 |
| 211649_x_at | IGHG1     | immunoglobulin heavy constant<br>gamma 1 (G1m marker)     | 2.63 |
| 211650_x_at | IL8       | interleukin 8                                             | 2.08 |
| 211662_s_at | VDAC2     | voltage-dependent anion channel<br>2                      | 1.66 |

|             |         |                                                                                   |           |
|-------------|---------|-----------------------------------------------------------------------------------|-----------|
| 211677_x_at | CADM3   | cell adhesion molecule 3                                                          | -<br>1.62 |
| 211687_x_at | KIR3DL1 | killer cell immunoglobulin-like receptor, three domains, long cytoplasmic tail, 1 | -<br>1.17 |
| 211689_s_at | TMPRSS2 | transmembrane protease, serine 2                                                  | 1.78      |
| 211744_s_at | CD58    | CD58 molecule                                                                     | 1.99      |
| 211746_x_at | PSMA1   | proteasome (prosome, macropain) subunit, alpha type, 1                            | 1.45      |
| 211749_s_at | VAMP3   | vesicle-associated membrane protein 3 (cellubrevin)                               | 2.34      |
| 211768_at   | LAT2    | linker for activation of T cells family, member 2                                 | -<br>1.83 |
| 211771_s_at | POU2F2  | POU class 2 homeobox 2                                                            | -<br>1.86 |

|             |        |                                                                    |           |
|-------------|--------|--------------------------------------------------------------------|-----------|
| 211779_x_at | AP2A2  | adaptor-related protein complex<br>2, alpha 2 subunit              | 1.49      |
| 211788_s_at | TREX2  | three prime repair exonuclease 2                                   | -<br>1.29 |
| 211797_s_at | NFYC   | nuclear transcription factor Y,<br>gamma                           | 1.38      |
| 211798_x_at | IGLJ3  | immunoglobulin lambda joining<br>3                                 | 3         |
| 211799_x_at | HLA-C  | major histocompatibility<br>complex, class I, C                    | 1.83      |
| 211800_s_at | USP4   | ubiquitin specific peptidase 4<br>(proto-oncogene)                 | 1.58      |
| 211805_s_at | SLC8A1 | solute carrier family 8<br>(sodium/calcium exchanger),<br>member 1 | -<br>1.43 |
| 211858_x_at | GNAS   | GNAS complex locus                                                 | 1.75      |

|             |         |                                                                                         |           |
|-------------|---------|-----------------------------------------------------------------------------------------|-----------|
| 211862_x_at | CFLAR   | CASP8 and FADD-like<br>apoptosis regulator                                              | 1.68      |
| 211868_x_at | IFI6    | interferon, alpha-inducible<br>protein 6                                                | 2.03      |
| 211889_x_at | CEACAM1 | carcinoembryonic antigen-<br>related cell adhesion molecule 1<br>(biliary glycoprotein) | 1.61      |
| 211904_x_at | RAD52   | RAD52 homolog ( <i>S. cerevisiae</i> )                                                  | -<br>1.76 |
| 211926_s_at | MYH9    | myosin, heavy chain 9, non-<br>muscle                                                   | 1.61      |
| 211939_x_at | BTF3    | basic transcription factor 3                                                            | 1.69      |
| 211940_x_at | H3F3A   | H3 histone, family 3A                                                                   | 1.56      |

|             |          |                                                                                              |      |
|-------------|----------|----------------------------------------------------------------------------------------------|------|
| 211945_s_at | ITGB1    | integrin, beta 1 (fibronectin receptor, beta polypeptide, antigen CD29 includes MDF2, MSK12) | 1.3  |
| 211972_x_at | RPLP0    | ribosomal protein, large, P0                                                                 | 1.36 |
| 211982_x_at | XPO6     | exportin 6                                                                                   | 1.62 |
| 211997_x_at | H3F3B    | H3 histone, family 3B (H3.3B)                                                                | 1.72 |
| 211999_at   | H3F3B    | H3 histone, family 3B (H3.3B)                                                                | 1.63 |
| 212003_at   | C1orf144 | chromosome 1 open reading frame 144                                                          | 1.27 |
| 212008_at   | UBXD2    | UBX domain containing 2                                                                      | 2.16 |
| 212009_s_at | STIP1    | stress-induced-phosphoprotein 1 (Hsp70/Hsp90-organizing protein)                             | 1.57 |
| 212016_s_at | PTBP1    | polypyrimidine tract binding protein 1                                                       | 1.53 |

|             |         |                                                                                                |           |
|-------------|---------|------------------------------------------------------------------------------------------------|-----------|
| 212022_s_at | MKI67   | antigen identified by monoclonal antibody Ki-67                                                | -<br>1.46 |
| 212024_x_at | FLII    | flightless I homolog<br>(Drosophila)                                                           | 1.37      |
| 212035_s_at | EXOC7   | exocyst complex component 7                                                                    | -<br>1.35 |
| 212081_x_at | BAT2    | HLA-B associated transcript 2                                                                  | 1.56      |
| 212085_at   | SLC25A6 | solute carrier family 25<br>(mitochondrial carrier; adenine nucleotide translocator), member 6 | 1.91      |

|             |       |                                                                                                     |           |
|-------------|-------|-----------------------------------------------------------------------------------------------------|-----------|
| 212090_at   | GRINA | glutamate receptor, ionotropic,<br>N-methyl D-aspartate-associated<br>protein 1 (glutamate binding) | 1.56      |
| 212108_at   | UBXD8 | UBX domain containing 8                                                                             | 1.53      |
| 212121_at   | TCTN3 | tectonic family member 3                                                                            | 1.72      |
| 212129_at   | NIPA2 | non imprinted in Prader-<br>Willi/Angelman syndrome 2                                               | 1.55      |
| 212137_at   | LARP1 | La ribonucleoprotein domain<br>family, member 1                                                     | 1.49      |
| 212159_x_at | AP2A2 | adaptor-related protein complex<br>2, alpha 2 subunit                                               | 1.61      |
| 212161_at   | AP2A2 | adaptor-related protein complex<br>2, alpha 2 subunit                                               | -<br>1.31 |
| 212169_at   | FKBP9 | FK506 binding protein 9, 63<br>kDa                                                                  | 1.47      |



|             |           |                                                      |      |
|-------------|-----------|------------------------------------------------------|------|
| 212174_at   | AK2       | adenylate kinase 2                                   | 1.46 |
| 212191_x_at | LOC388344 | similar to ribosomal protein L13                     | 1.52 |
| 212194_s_at | TM9SF4    | transmembrane 9 superfamily<br>protein member 4      | 1.85 |
| 212203_x_at | IFITM3    | interferon induced<br>transmembrane protein 3 (1-8U) | 1.75 |
| 212210_at   | INTS1     | integrator complex subunit 1                         | 1.57 |
| 212214_at   | OPA1      | optic atrophy 1 (autosomal<br>dominant)              | 2.08 |
| 212227_x_at | EIF1      | eukaryotic translation initiation<br>factor 1        | 1.72 |
| 212228_s_at | COQ9      | coenzyme Q9 homolog (S.<br>cerevisiae)               | 1.57 |
| 212248_at   | MTDH      | metadherin                                           | 1.72 |
| 212273_x_at | GNAS      | GNAS complex locus                                   | 1.86 |

|             |          |                                                                                  |      |
|-------------|----------|----------------------------------------------------------------------------------|------|
| 212296_at   | PSMD14   | proteasome (prosome, macropain) 26S subunit, non-ATPase, 14                      | 1.84 |
| 212299_at   | NEK9     | NIMA (never in mitosis gene a)-related kinase 9                                  | 1.4  |
| 212302_at   | RTF1     | Rtf1, Paf1/RNA polymerase II complex component, homolog ( <i>S. cerevisiae</i> ) | 1.48 |
| 212305_s_at | MIA3     | melanoma inhibitory activity family, member 3                                    | 2.23 |
| 212311_at   | KIAA0746 | KIAA0746 protein                                                                 | 2.47 |
| 212348_s_at | AOF2     | amine oxidase (flavin containing) domain 2                                       | 1.54 |
| 212355_at   | KIAA0323 | KIAA0323                                                                         | 1.6  |

|             |         |                                                                         |           |
|-------------|---------|-------------------------------------------------------------------------|-----------|
| 212362_at   | ATP2A2  | ATPase, Ca <sup>++</sup> transporting,<br>cardiac muscle, slow twitch 2 | -<br>1.43 |
| 212390_at   | PDE4DIP | phosphodiesterase 4D<br>interacting protein (myomegalin)                | 1.79      |
| 212411_at   | IMP4    | IMP4, U3 small nucleolar<br>ribonucleoprotein, homolog<br>(yeast)       | 1.73      |
| 212415_at   | 6-Sep   | septin 6                                                                | 2.08      |
| 212433_x_at | RPS2    | ribosomal protein S2                                                    | 1.58      |

|             |          |                                                   |      |
|-------------|----------|---------------------------------------------------|------|
|             |          |                                                   |      |
| 212436_at   | TRIM33   | tripartite motif-containing 33                    | 1.52 |
| 212447_at   | KBTBD2   | kelch repeat and BTB (POZ)<br>domain containing 2 | 1.6  |
| 212486_s_at | FYN      | FYN oncogene related to SRC,<br>FGR, YES          | 1.98 |
| 212491_s_at | DNAJC8   | DnaJ (Hsp40) homolog,<br>subfamily C, member 8    | 1.55 |
| 212497_at   | C14orf32 | chromosome 14 open reading<br>frame 32            | 1.48 |
| 212502_at   | C10orf22 | chromosome 10 open reading<br>frame 22            | 1.67 |

|             |         |                                                      |      |
|-------------|---------|------------------------------------------------------|------|
| 212530_at   | NEK7    | NIMA (never in mitosis gene a)-<br>related kinase 7  | 1.52 |
| 212556_at   | SCRIB   | scribbled homolog (Drosophila)                       | 1.63 |
| 212576_at   | MGRN1   | mahogunin, ring finger 1                             | 1.66 |
| 212584_at   | AQR     | aquarius homolog (mouse)                             | 1.91 |
| 212599_at   | AUTS2   | autism susceptibility candidate 2                    | 1.68 |
| 212613_at   | BTN3A2  | butyrophilin, subfamily 3,<br>member A2              | 1.65 |
| 212622_at   | TMEM41B | transmembrane protein 41B                            | 1.5  |
| 212623_at   | TMEM41B | transmembrane protein 41B                            | 1.93 |
| 212626_x_at | HNRNPC  | heterogeneous nuclear<br>ribonucleoprotein C (C1/C2) | 1.4  |

|             |         |                                                                                    |           |
|-------------|---------|------------------------------------------------------------------------------------|-----------|
| 212649_at   | DHX29   | DEAH (Asp-Glu-Ala-His) box polypeptide 29                                          | 1.62      |
| 212676_at   | NF1     | neurofibromin 1<br>(neurofibromatosis, von Recklinghausen disease, Watson disease) | 1.52      |
| 212678_at   | NF1     | neurofibromin 1<br>(neurofibromatosis, von Recklinghausen disease, Watson disease) | 1.66      |
| 212708_at   | MSL-1   | male-specific lethal-1 homolog                                                     | 1.71      |
| 212710_at   | CAMSAP1 | calmodulin regulated spectrin-associated protein 1                                 | -<br>1.34 |
| 212739_s_at | NME4    | non-metastatic cells 4, protein expressed in                                       | 1.8       |
| 212782_x_at | POLR2J  | polymerase (RNA) II (DNA directed) polypeptide J, 13.3kDa                          | 1.81      |

|             |          |                                                                                       |      |
|-------------|----------|---------------------------------------------------------------------------------------|------|
| 212785_s_at | LARP7    | La ribonucleoprotein domain family, member 7                                          | 1.44 |
| 212825_at   | PAXIP1   | PAX interacting (with transcription-activation domain) protein 1                      | 1.59 |
| 212833_at   | SLC25A46 | solute carrier family 25, member 46                                                   | 1.87 |
| 212851_at   | DCUN1D4  | DCN1, defective in cullin neddylation 1, domain containing 4 ( <i>S. cerevisiae</i> ) | 1.5  |
| 212881_at   | PIAS4    | protein inhibitor of activated STAT, 4                                                | 1.29 |
| 212896_at   | SKIV2L2  | superkiller viralicidic activity 2-like 2 ( <i>S. cerevisiae</i> )                    | 1.6  |
| 212908_at   | DNAJC16  | DnaJ (Hsp40) homolog, subfamily C, member 16                                          | 1.88 |
| 212922_s_at | SMYD2    | SET and MYND domain containing 2                                                      | 1.59 |

|             |          |                                                           |      |
|-------------|----------|-----------------------------------------------------------|------|
| 212945_s_at | MGA      | MAX gene associated                                       | 1.43 |
| 212955_s_at | POLR2I   | polymerase (RNA) II (DNA directed) polypeptide I, 14.5kDa | 1.56 |
| 212956_at   | TBC1D9   | TBC1 domain family, member 9 (with GRAM domain)           | 2.24 |
| 212961_x_at | CXorf40B | chromosome X open reading frame 40B                       | 1.77 |
| 212990_at   | SYNJ1    | synaptojanin 1                                            | 1.71 |
| 212995_x_at | FAM128B  | family with sequence similarity 128, member B             | 1.39 |
| 212998_x_at | HLA-DQB1 | major histocompatibility complex, class II, DQ beta 1     | 3.41 |



|             |            |                                                                       |           |
|-------------|------------|-----------------------------------------------------------------------|-----------|
| 213028_at   | NFRKB      | nuclear factor related to kappaB<br>binding protein                   | -<br>1.44 |
| 213048_s_at | SET        | SET translocation (myeloid<br>leukemia-associated)                    | 2.54      |
| 213100_at   |            | NA                                                                    | -<br>1.36 |
| 213121_at   | SNRP70     | small nuclear ribonucleoprotein<br>70kDa polypeptide (RNP<br>antigen) | -<br>1.63 |
| 213135_at   | TIAM1      | T-cell lymphoma invasion and<br>metastasis 1                          | 1.88      |
| 213142_x_at | tcag7.1314 | hypothetical protein LOC54103                                         | 2.37      |
| 213152_s_at | SFRS2B     | splicing factor, arginine/serine-<br>rich 2B                          | 1.36      |
| 213155_at   | WSCD1      | WSC domain containing 1                                               | -         |

|             |          |                                                                                                  |           |
|-------------|----------|--------------------------------------------------------------------------------------------------|-----------|
|             |          |                                                                                                  | 1.66      |
| 213161_at   | C9orf97  | chromosome 9 open reading<br>frame 97                                                            | 1.44      |
| 213166_x_at | FAM128A  | family with sequence similarity<br>128, member A                                                 | 1.46      |
| 213175_s_at | SNRPB    | small nuclear ribonucleoprotein<br>polypeptides B and B1                                         | 2.89      |
| 213193_x_at | TRBC1    | T cell receptor beta constant 1                                                                  | 2.14      |
| 213200_at   | SYP      | synaptophysin                                                                                    | -<br>2.18 |
| 213210_at   | TAF6L    | TAF6-like RNA polymerase II,<br>p300/CBP-associated factor<br>(PCAF)-associated factor,<br>65kDa | -<br>1.42 |
| 213224_s_at | LOC92482 | hypothetical protein LOC92482                                                                    | 1.88      |

|             |          |                                                                   |      |
|-------------|----------|-------------------------------------------------------------------|------|
|             |          |                                                                   |      |
| 213239_at   | C13orf24 | chromosome 13 open reading<br>frame 24                            | 1.63 |
| 213263_s_at | PCBP2    | poly(rC) binding protein 2                                        | 1.65 |
| 213289_at   | SATL1    | spermidine/spermine N1-acetyl<br>transferase-like 1               | 1.7  |
| 213292_s_at | SNX13    | sorting nexin 13                                                  | 1.82 |
| 213293_s_at | TRIM22   | tripartite motif-containing 22                                    | 2.76 |
| 213294_at   |          | NA                                                                | 2.67 |
| 213305_s_at | PPP2R5C  | protein phosphatase 2,<br>regulatory subunit B', gamma<br>isoform | 1.72 |
| 213312_at   | C6orf162 | chromosome 6 open reading<br>frame 162                            | 1.92 |
| 213315_x_at | CXorf40A | chromosome X open reading<br>frame 40A                            | 2.04 |

|             |        |                                                                                   |      |
|-------------|--------|-----------------------------------------------------------------------------------|------|
| 213318_s_at | BAT3   | HLA-B associated transcript 3                                                     | 1.41 |
| 213320_at   | PRMT3  | protein arginine<br>methyltransferase 3                                           | 1.75 |
| 213326_at   | VAMP1  | vesicle-associated membrane<br>protein 1 (synaptobrevin 1)                        | 1.63 |
| 213342_at   | YAP1   | Yes-associated protein 1, 65kDa                                                   | 1.61 |
| 213345_at   | NFATC4 | nuclear factor of activated T-<br>cells, cytoplasmic, calcineurin-<br>dependent 4 | -1.6 |
| 213350_at   | RPS11  | ribosomal protein S11                                                             | 1.58 |
| 213364_s_at | SNX1   | sorting nexin 1                                                                   | 1.64 |
| 213373_s_at | CASP8  | caspase 8, apoptosis-related<br>cysteine peptidase                                | 2    |
| 213389_at   | ZNF592 | zinc finger protein 592                                                           | -1.5 |
| 213392_at   | IQCK   | IQ motif containing K                                                             | 1.62 |

|             |          |                                                                                                        |           |
|-------------|----------|--------------------------------------------------------------------------------------------------------|-----------|
| 213414_s_at | RPS19    | ribosomal protein S19                                                                                  | 1.44      |
| 213415_at   | CLIC2    | chloride intracellular channel 2                                                                       | 2.38      |
| 213416_at   | CERKL    | ceramide kinase-like                                                                                   | 2.29      |
| 213459_at   | RPL37A   | ribosomal protein L37a                                                                                 | 2.15      |
| 213463_s_at | KIAA0974 | KIAA0974                                                                                               | 1.42      |
| 213465_s_at | PPP1R7   | protein phosphatase 1,<br>regulatory (inhibitor) subunit 7                                             | 1.98      |
| 213483_at   | PPWD1    | peptidylprolyl isomerase domain<br>and WD repeat containing 1                                          | 1.82      |
| 213484_at   |          | NA                                                                                                     | -<br>1.39 |
| 213492_at   | COL2A1   | collagen, type II, alpha 1<br>(primary osteoarthritis,<br>spondyloepiphyseal dysplasia,<br>congenital) | -<br>1.18 |
| 213494_s_at | YY1      | YY1 transcription factor                                                                               | 1.34      |

|             |          |                                                                           |           |
|-------------|----------|---------------------------------------------------------------------------|-----------|
| 213514_s_at | DIAPH1   | diaphanous homolog 1<br>(Drosophila)                                      | -<br>1.43 |
| 213521_at   | PTPN18   | protein tyrosine phosphatase,<br>non-receptor type 18 (brain-<br>derived) | -<br>1.41 |
| 213527_s_at | ZNF688   | zinc finger protein 688                                                   | 1.39      |
| 213528_at   | C1orf156 | chromosome 1 open reading<br>frame 156                                    | 1.54      |
| 213529_at   | ZNF688   | zinc finger protein 688                                                   | -<br>1.98 |
| 213548_s_at | CDV3     | CDV3 homolog (mouse)                                                      | 1.83      |
| 213559_s_at | ZNF467   | zinc finger protein 467                                                   | -<br>1.39 |
| 213563_s_at | TUBGCP2  | tubulin, gamma complex<br>associated protein 2                            | -<br>1.88 |
| 213592_at   | AGTRL1   | angiotensin II receptor-like 1                                            | -<br>1.56 |
| 213594_x_at | FUSIP1   | FUS interacting protein<br>(serine/arginine-rich) 1                       | 1.89      |

|             |          |                                                                                               |           |
|-------------|----------|-----------------------------------------------------------------------------------------------|-----------|
|             |          |                                                                                               |           |
| 213595_s_at | CDC42BPA | CDC42 binding protein kinase<br>alpha (DMPK-like)                                             | -<br>1.35 |
| 213603_s_at | RAC2     | ras-related C3 botulinum toxin<br>substrate 2 (rho family, small<br>GTP binding protein Rac2) | 2.07      |
| 213619_at   | HNRPH1   | heterogeneous nuclear<br>ribonucleoprotein H1 (H)                                             | 2.14      |
| 213642_at   |          | NA                                                                                            | 2.93      |
| 213655_at   | PAFAH1B1 | platelet-activating factor<br>acetylhydrolase, isoform Ib,<br>alpha subunit 45kDa             | 2.29      |
| 213658_at   | ZNF710   | zinc finger protein 710                                                                       | -<br>1.25 |
| 213660_s_at | TOP3B    | topoisomerase (DNA) III beta                                                                  | -<br>1.38 |

|             |          |                                                            |           |
|-------------|----------|------------------------------------------------------------|-----------|
| 213669_at   | FCHO1    | FCH domain only 1                                          | -2        |
| 213676_at   | C6orf137 | chromosome 6 open reading<br>frame 137                     | -<br>1.28 |
| 213698_at   | ZMYM6    | zinc finger, MYM-type 6                                    | 2.48      |
| 213707_s_at | DLX5     | distal-less homeobox 5                                     | -<br>1.25 |
| 213711_at   | KRT81    | keratin 81                                                 | -<br>1.62 |
| 213734_at   | RFC5     | replication factor C (activator 1)<br>5, 36.5kDa           | 2.39      |
| 213743_at   | CCNT2    | cyclin T2                                                  | 1.64      |
| 213755_s_at | SKI      | v-ski sarcoma viral oncogene<br>homolog (avian)            | -<br>1.59 |
| 213771_at   | IRF2BP1  | interferon regulatory factor 2<br>binding protein 1        | -<br>1.45 |
| 213820_s_at | STARD5   | StAR-related lipid transfer<br>(START) domain containing 5 | 1.66      |
| 213828_x_at | H3F3A    | H3 histone, family 3A                                      | 1.52      |



|             |         |                                                         |           |
|-------------|---------|---------------------------------------------------------|-----------|
|             |         |                                                         |           |
| 213853_at   | DPH4    | DPH4, JJJ3 homolog (S. cerevisiae)                      | 2.12      |
| 213872_at   | C6orf62 | chromosome 6 open reading frame 62                      | 7.5       |
| 213875_x_at | C6orf62 | chromosome 6 open reading frame 62                      | 2.23      |
| 213879_at   |         | NA                                                      | 1.99      |
| 213882_at   | TM2D1   | TM2 domain containing 1                                 | 1.49      |
| 213887_s_at | POLR2E  | polymerase (RNA) II (DNA directed) polypeptide E, 25kDa | 2.39      |
| 213893_x_at | PMS2L1  | postmeiotic segregation increased 2-like 1              | 1.44      |
| 213900_at   | C9orf61 | chromosome 9 open reading frame 61                      | -<br>1.38 |
| 213911_s_at | H2AFZ   | H2A histone family, member Z                            | 1.7       |

|             |          |                                                          |      |
|-------------|----------|----------------------------------------------------------|------|
| 213945_s_at | NUP210   | nucleoporin 210kDa                                       | 1.27 |
|             |          |                                                          | -    |
| 213966_at   | HMG20B   | high-mobility group 20B                                  | 1.23 |
| 213988_s_at | SAT1     | spermidine/spermine N1-acetyltransferase 1               | 1.36 |
| 214007_s_at | TWF1     | twinfilin, actin-binding protein, homolog 1 (Drosophila) | 1.73 |
| 214022_s_at | IFITM2   | interferon induced transmembrane protein 2 (1-8D)        | 2.55 |
| 214051_at   | MGC39900 | hypothetical protein MGC39900                            | 1.25 |
|             |          |                                                          | -    |
| 214054_at   | DOK2     | docking protein 2, 56kDa                                 | 1.72 |
|             |          |                                                          | -    |
| 214065_s_at | CIB2     | calcium and integrin binding family member 2             | 1.15 |

|             |           |                                                                                                   |           |
|-------------|-----------|---------------------------------------------------------------------------------------------------|-----------|
| 214066_x_at | NPR2      | natriuretic peptide receptor<br>B/guanylate cyclase B<br>(atrionatriuretic peptide receptor<br>B) | -<br>1.62 |
| 214071_at   | MPPE1     | metallophosphoesterase 1                                                                          | 1.19      |
| 214086_s_at | PARP2     | poly (ADP-ribose) polymerase<br>family, member 2                                                  | 1.53      |
| 214101_s_at | LOC728896 | hypothetical protein LOC728896                                                                    | 1.7       |
| 214112_s_at | CXorf40A  | chromosome X open reading<br>frame 40A                                                            | 1.58      |
| 214134_at   | C2orf55   | chromosome 2 open reading<br>frame 55                                                             | -<br>1.31 |
| 214141_x_at | SFRS7     | splicing factor, arginine/serine-<br>rich 7, 35kDa                                                | 2.18      |

|             |            |                                                                              |           |
|-------------|------------|------------------------------------------------------------------------------|-----------|
| 214145_s_at | SPTB       | spectrin, beta, erythrocytic<br>(includes spherocytosis, clinical<br>type I) | -<br>1.67 |
| 214167_s_at | RPLP0-like | ribosomal protein P0-like                                                    | 1.77      |
| 214176_s_at | PBXIP1     | pre-B-cell leukemia homeobox<br>interacting protein 1                        | 1.59      |
| 214257_s_at | SEC22B     | SEC22 vesicle trafficking<br>protein homolog B (S.<br>cerevisiae)            | 2.2       |
| 214269_at   | MFSD7      | major facilitator superfamily<br>domain containing 7                         | 1.21      |
| 214272_at   | CYLD       | cylindromatosis (turban tumor<br>syndrome)                                   | -1.3      |
| 214279_s_at | NDRG2      | NDRG family member 2                                                         | 2.98      |
| 214292_at   | ITGB4      | integrin, beta 4                                                             | -         |

|             |          |                                                 |           |
|-------------|----------|-------------------------------------------------|-----------|
|             |          |                                                 | 1.46      |
| 214294_at   | KIAA0485 | KIAA0485 protein                                | -<br>1.37 |
| 214297_at   | CSPG4    | chondroitin sulfate proteoglycan<br>4           | -<br>1.19 |
| 214301_s_at | DPYSL4   | dihydropyrimidinase-like 4                      | -<br>1.52 |
| 214303_x_at | MUC5AC   | mucin 5AC, oligomeric<br>mucus/gel-forming      | -<br>1.64 |
| 214304_x_at | DMN      | desmuslin                                       | -<br>1.38 |
| 214372_x_at | ERN2     | endoplasmic reticulum to<br>nucleus signaling 2 | -<br>1.63 |
| 214385_s_at | MUC5AC   | mucin 5AC, oligomeric<br>mucus/gel-forming      | -<br>1.39 |

|             |        |                                                                               |           |
|-------------|--------|-------------------------------------------------------------------------------|-----------|
|             |        |                                                                               |           |
| 214398_s_at | IKBKE  | inhibitor of kappa light polypeptide gene enhancer in B-cells, kinase epsilon | -1.5      |
| 214408_s_at | RFPL3S | ret finger protein-like 3 antisense                                           | -<br>1.36 |
| 214412_at   | H2AFB2 | H2A histone family, member B2                                                 | -<br>1.38 |
| 214420_s_at | CYP2C9 | cytochrome P450, family 2, subfamily C, polypeptide 9                         | 2.14      |
| 214422_at   | RAD23B | RAD23 homolog B (S. cerevisiae)                                               | 1.38      |
| 214423_x_at | ALDOB  | aldolase B, fructose-bisphosphate                                             | 1.67      |
| 214430_at   | GLA    | galactosidase, alpha                                                          | 1.53      |
| 214453_s_at | IFI44  | interferon-induced protein 44                                                 | 3.81      |
| 214459_x_at | HLA-C  | major histocompatibility                                                      | 1.9       |

|             |        |                                                         |           |
|-------------|--------|---------------------------------------------------------|-----------|
|             |        | complex, class I, C                                     |           |
| 214473_x_at | PMS2L3 | postmeiotic segregation<br>increased 2-like 3           | 1.27      |
| 214484_s_at | OPRS1  | opioid receptor, sigma 1                                | 1.68      |
| 214485_at   | ODF1   | outer dense fiber of sperm tails 1                      | -<br>1.68 |
| 214487_s_at | RAP2B  | RAP2B, member of RAS<br>oncogene family                 | 1.32      |
| 214495_at   | CACNG2 | calcium channel, voltage-<br>dependent, gamma subunit 2 | -<br>1.38 |
| 214500_at   | H2AFY  | H2A histone family, member Y                            | 1.7       |
| 214524_at   | GHRH   | growth hormone releasing<br>hormone                     | -<br>1.35 |
| 214527_s_at | PQBPI  | polyglutamine binding protein 1                         | 1.9       |

|             |         |                                                         |           |
|-------------|---------|---------------------------------------------------------|-----------|
| 214548_x_at | GNAS    | GNAS complex locus                                      | 1.94      |
| 214553_s_at | ARPP-19 | cyclic AMP phosphoprotein, 19 kD                        | 1.6       |
| 214567_s_at | XCL2    | chemokine (C motif) ligand 2                            | 1.58      |
| 214578_s_at | ROCK1   | Rho-associated, coiled-coil containing protein kinase 1 | 1.44      |
| 214594_x_at | ATP8B1  | ATPase, Class I, type 8B, member 1                      | -<br>3.83 |
| 214595_at   | KCNG1   | potassium voltage-gated channel, subfamily G, member 1  | -<br>1.55 |
| 214617_at   | PRF1    | perforin 1 (pore forming protein)                       | 1.63      |
| 214625_s_at | MINK1   | misshapen-like kinase 1 (zebrafish)                     | -<br>1.37 |
| 214630_at   | CYP11B2 | cytochrome P450, family 11, subfamily B, polypeptide 2  | 1.7       |



|             |           |                                                                                     |           |
|-------------|-----------|-------------------------------------------------------------------------------------|-----------|
| 214637_at   | OSM       | oncostatin M                                                                        | -<br>1.69 |
| 214643_x_at | BIN1      | bridging integrator 1                                                               | -<br>1.29 |
| 214647_s_at | HFE       | hemochromatosis                                                                     | 1.3       |
| 214649_s_at | MTMR2     | myotubularin related protein 2                                                      | 1.39      |
| 214699_x_at | WIPI2     | WD repeat domain,<br>phosphoinositide interacting 2                                 | -1.8      |
| 214701_s_at | FN1       | fibronectin 1                                                                       | 1.98      |
| 214712_at   | LOC730092 | RRN3 RNA polymerase I<br>transcription factor homolog (S.<br>cerevisiae) pseudogene | 1.14      |
| 214721_x_at | CDC42EP4  | CDC42 effector protein (Rho<br>GTPase binding) 4                                    | 2.06      |
| 214737_x_at | HNRNPC    | heterogeneous nuclear<br>ribonucleoprotein C (C1/C2)                                | 1.44      |

|             |           |                                    |      |
|-------------|-----------|------------------------------------|------|
|             |           |                                    |      |
| 214768_x_at | IGKC      | immunoglobulin kappa constant      | 5.62 |
|             |           |                                    | -    |
| 214818_at   | CCDC57    | coiled-coil domain containing 57   | 1.39 |
|             |           |                                    | -    |
| 214824_at   |           | NA                                 | 1.43 |
|             |           |                                    |      |
| 214830_at   | SLC38A6   | solute carrier family 38, member 6 | 1.95 |
|             |           |                                    |      |
| 214831_at   | MED28     | mediator complex subunit 28        | 1.39 |
|             |           |                                    | -    |
| 214839_at   | LOC157627 | hypothetical protein LOC157627     | 1.53 |
|             |           |                                    | -    |
| 214840_at   | TOM1L2    | target of myb1-like 2 (chicken)    | 1.35 |
|             |           |                                    |      |
| 214871_x_at |           | NA                                 | -1.6 |

|             |       |                                                                                                   |           |
|-------------|-------|---------------------------------------------------------------------------------------------------|-----------|
| 214875_x_at | APLP2 | amyloid beta (A4) precursor-like protein 2                                                        | 1.72      |
| 214880_x_at | CALD1 | caldesmon 1                                                                                       | 1.67      |
| 214882_s_at | SFRS2 | splicing factor, arginine/serine-rich 2                                                           | 1.94      |
| 214883_at   | THRA  | thyroid hormone receptor, alpha (erythroblastic leukemia viral (v-erb-a) oncogene homolog, avian) | -1.5      |
| 214893_x_at | HCN2  | hyperpolarization activated cyclic nucleotide-gated potassium channel 2                           | -<br>1.52 |
| 214916_x_at | IL8   | interleukin 8                                                                                     | 3.13      |

|             |           |                                              |           |
|-------------|-----------|----------------------------------------------|-----------|
|             |           |                                              |           |
| 214932_at   | KIDINS220 | kinase D-interacting substrate of<br>220 kDa | -<br>1.18 |
| 214934_at   | ATP9B     | ATPase, Class II, type 9B                    | 1.51      |
| 214943_s_at | RBM34     | RNA binding motif protein 34                 | 1.38      |
| 214949_at   |           | NA                                           | 1.55      |
| 214950_at   | IL9R      | interleukin 9 receptor                       | -<br>1.44 |
| 214959_s_at | API5      | apoptosis inhibitor 5                        | 1.74      |

|             |           |                                                          |           |
|-------------|-----------|----------------------------------------------------------|-----------|
| 214968_at   | DDX51     | DEAD (Asp-Glu-Ala-Asp) box polypeptide 51                | -1.4      |
| 214969_at   | MAP3K9    | mitogen-activated protein kinase kinase kinase 9         | -<br>1.32 |
| 214990_at   | PIGO      | phosphatidylinositol glycan anchor biosynthesis, class O | -<br>1.76 |
| 214999_s_at | RAB11FIP3 | RAB11 family interacting protein 3 (class II)            | -<br>1.64 |
| 215015_at   | CCDC64    | coiled-coil domain containing 64                         | -<br>1.46 |
| 215054_at   | EPOR      | erythropoietin receptor                                  | 1.47      |
| 215061_at   | LOC399818 | similar to CG9643-PA                                     | -1.5      |
| 215137_at   | KIAA0508  | KIAA0508 protein                                         | -1.3      |
| 215150_at   | YOD1      | YOD1 OTU deubiquinating enzyme 1 homolog (S.             | 1.13      |

|             |          |                                                                                               |           |
|-------------|----------|-----------------------------------------------------------------------------------------------|-----------|
|             |          | cerevisiae)                                                                                   |           |
| 215161_at   | CAMK1G   | calcium/calmodulin-dependent<br>protein kinase IG                                             | -<br>1.51 |
| 215180_at   |          | NA                                                                                            | -<br>1.57 |
| 215189_at   | KRT86    | keratin 86                                                                                    | -<br>1.32 |
| 215196_at   | LOC91316 | similar to bK246H3.1<br>(immunoglobulin lambda-like<br>polypeptide 1, pre-B-cell<br>specific) | -<br>1.43 |
| 215216_at   | VPS16    | vacuolar protein sorting 16<br>homolog ( <i>S. cerevisiae</i> )                               | -<br>1.24 |
| 215236_s_at | PICALM   | phosphatidylinositol binding<br>clathrin assembly protein                                     | 2.55      |
| 215238_s_at | DOCK9    | dedicator of cytokinesis 9                                                                    | -<br>1.35 |

|             |         |                                                                                    |           |
|-------------|---------|------------------------------------------------------------------------------------|-----------|
| 215243_s_at | GJB3    | gap junction protein, beta 3,<br>31kDa                                             | -<br>1.47 |
| 215252_at   | DNAJC7  | DnaJ (Hsp40) homolog,<br>subfamily C, member 7                                     | -<br>1.83 |
| 215260_s_at | TCF3    | transcription factor 3 (E2A<br>immunoglobulin enhancer<br>binding factors E12/E47) | -<br>1.41 |
| 215265_at   | EMX1    | empty spiracles homeobox 1                                                         | -<br>1.42 |
| 215267_s_at | SLC8A2  | solute carrier family 8 (sodium-<br>calcium exchanger), member 2                   | -<br>2.03 |
| 215274_at   | SLC12A3 | solute carrier family 12<br>(sodium/chloride transporters),<br>member 3            | -<br>1.65 |
| 215292_s_at | MKL1    | megakaryoblastic leukemia<br>(translocation) 1                                     | -<br>1.96 |
| 215323_at   | LUZP2   | leucine zipper protein 2                                                           | -         |

|             |           |                                                |           |
|-------------|-----------|------------------------------------------------|-----------|
|             |           |                                                | 1.33      |
| 215328_at   | KIAA0953  | KIAA0953                                       | -<br>1.68 |
| 215332_s_at | CD8B      | CD8b molecule                                  | 1.18      |
| 215340_at   | ADCY1     | adenylate cyclase 1 (brain)                    | -1.3      |
| 215341_at   | LOC200383 | similar to Dynein heavy chain at<br>16F        | -<br>1.42 |
| 215344_at   |           | NA                                             | -<br>1.35 |
| 215351_at   | RTCD1     | RNA terminal phosphate cyclase<br>domain 1     | 1.22      |
| 215353_at   | GIMAP5    | GTPase, IMAP family member<br>5                | -<br>1.45 |
| 215384_s_at | MAP1A     | microtubule-associated protein<br>1A           | -<br>1.68 |
| 215397_x_at | THSD4     | thrombospondin, type I, domain<br>containing 4 | -<br>1.46 |



|             |           |                                                                                              |           |
|-------------|-----------|----------------------------------------------------------------------------------------------|-----------|
|             |           |                                                                                              | -         |
| 215400_x_at | ADCY9     | adenylate cyclase 9                                                                          | 1.33      |
| 215404_x_at | FGFR1     | fibroblast growth factor receptor<br>1 (fms-related tyrosine kinase 2,<br>Pfeiffer syndrome) | -<br>2.37 |
| 215420_at   | IHH       | Indian hedgehog homolog<br>(Drosophila)                                                      | -<br>1.91 |
| 215424_s_at | SNW1      | SNW domain containing 1                                                                      | 1.88      |
| 215429_s_at | ZNF428    | zinc finger protein 428                                                                      | 1.45      |
| 215430_at   | GK2       | glycerol kinase 2                                                                            | -<br>1.27 |
| 215450_at   | SNRPE     | small nuclear ribonucleoprotein<br>polypeptide E                                             | 3.26      |
| 215462_at   | LOC149478 | hypothetical protein LOC149478                                                               | -<br>1.54 |

|             |         |                                                                     |           |
|-------------|---------|---------------------------------------------------------------------|-----------|
| 215464_s_at | TAX1BP3 | Tax1 (human T-cell leukemia virus type I) binding protein 3         | 1.58      |
| 215493_x_at | BTN2A1  | butyrophilin, subfamily 2, member A1                                | 1.49      |
| 215495_s_at | SAMD4A  | sterile alpha motif domain containing 4A                            | 1.65      |
| 215502_at   |         | NA                                                                  | -<br>1.73 |
| 215512_at   | 6-Mar   | membrane-associated ring finger (C3HC4) 6                           | 1.27      |
| 215524_x_at | YME1L1  | YME1-like 1 ( <i>S. cerevisiae</i> )                                | 1.17      |
| 215527_at   | KHDRBS2 | KH domain containing, RNA binding, signal transduction associated 2 | -<br>1.37 |
| 215541_s_at | DIAPH1  | diaphanous homolog 1 ( <i>Drosophila</i> )                          | -<br>1.64 |

|             |          |                                                 |           |
|-------------|----------|-------------------------------------------------|-----------|
| 215553_x_at | WDR45    | WD repeat domain 45                             | -<br>2.12 |
| 215557_at   | SCD5     | stearoyl-CoA desaturase 5                       | -<br>1.83 |
| 215564_at   | AREG     | amphiregulin (schwannoma-derived growth factor) | 1.08      |
| 215568_x_at | LYPLA2   | lysophospholipase II                            | -<br>1.75 |
| 215594_at   |          | NA                                              | -<br>1.44 |
| 215608_at   |          | NA                                              | -1.9      |
| 215616_s_at | JMJD2B   | jumonji domain containing 2B                    | -<br>1.47 |
| 215632_at   | NEUROG2  | neurogenin 2                                    | -<br>1.18 |
| 215644_at   | ZNF518   | zinc finger protein 518                         | -<br>1.25 |
| 215667_x_at | PMS2L1   | postmeiotic segregation increased 2-like 1      | 1.46      |
| 215680_at   | KIAA1654 | KIAA1654 protein                                | -         |

|             |         |                                                                                                                                 |           |
|-------------|---------|---------------------------------------------------------------------------------------------------------------------------------|-----------|
|             |         |                                                                                                                                 | 1.39      |
| 215685_s_at | DLX2    | distal-less homeobox 2                                                                                                          | -<br>1.69 |
| 215705_at   | PPP5C   | protein phosphatase 5, catalytic subunit                                                                                        | -<br>1.38 |
| 215707_s_at | PRNP    | prion protein (p27-30)<br>(Creutzfeldt-Jakob disease,<br>Gerstmann-Strausler-Scheinker<br>syndrome, fatal familial<br>insomnia) | 1.61      |
| 215714_s_at | SMARCA4 | SWI/SNF related, matrix<br>associated, actin dependent<br>regulator of chromatin,<br>subfamily a, member 4                      | 1.38      |
| 215719_x_at | FAS     | Fas (TNF receptor superfamily,<br>member 6)                                                                                     | 2.7       |

|             |         |                                                                                      |           |
|-------------|---------|--------------------------------------------------------------------------------------|-----------|
| 215809_at   | CYP2D6  | cytochrome P450, family 2,<br>subfamily D, polypeptide 6                             | -<br>1.43 |
| 215827_x_at | CROCCL2 | ciliary rootlet coiled-coil,<br>rootletin-like 2                                     | -<br>1.61 |
| 215829_at   | SHANK2  | SH3 and multiple ankyrin repeat<br>domains 2                                         | -<br>1.21 |
| 215832_x_at | PICALM  | phosphatidylinositol binding<br>clathrin assembly protein                            | 1.66      |
| 215839_at   | LILRA5  | leukocyte immunoglobulin-like<br>receptor, subfamily A (with TM<br>domain), member 5 | -1.5      |
| 215865_at   | SYT12   | synaptotagmin XII                                                                    | -<br>1.43 |
| 215916_at   | MINK1   | misshapen-like kinase 1<br>(zebrafish)                                               | -1.2      |

|             |         |                                                                                      |           |
|-------------|---------|--------------------------------------------------------------------------------------|-----------|
| 215927_at   | ARFGEF2 | ADP-ribosylation factor guanine nucleotide-exchange factor 2 (brefeldin A-inhibited) | -<br>1.43 |
| 215928_at   | ABLIM2  | actin binding LIM protein family, member 2                                           | -1.6      |
| 215952_s_at | OAZ1    | ornithine decarboxylase antizyme 1                                                   | 1.95      |
| 215972_at   | PART1   | prostate androgen-regulated transcript 1                                             | -<br>1.63 |
| 215977_x_at | GK      | glycerol kinase                                                                      | 2.11      |
| 216003_at   | CDRT1   | CMT1A duplicated region transcript 1                                                 | -<br>1.29 |
| 216019_x_at | PHLDB1  | pleckstrin homology-like domain, family B, member 1                                  | -<br>1.47 |
| 216023_at   | JMJD2B  | jumonji domain containing 2B                                                         | -<br>1.65 |
| 216026_s_at | POLE    | polymerase (DNA directed),                                                           | -         |

|             |           |                                                             |           |
|-------------|-----------|-------------------------------------------------------------|-----------|
|             |           | epsilon                                                     | 1.37      |
| 216041_x_at | GRN       | granulin                                                    | 1.72      |
| 216042_at   | TNFRSF25  | tumor necrosis factor receptor<br>superfamily, member 25    | -<br>1.63 |
| 216046_at   | PDE8A     | phosphodiesterase 8A                                        | -<br>1.28 |
| 216098_s_at | HTR7P     | 5-hydroxytryptamine (serotonin)<br>receptor 7 pseudogene    | -<br>1.18 |
| 216106_at   | LOC145678 | hypothetical protein LOC145678                              | -<br>1.48 |
| 216137_s_at | MAPK8IP3  | mitogen-activated protein kinase<br>8 interacting protein 3 | -<br>1.51 |
| 216180_s_at | SYNJ2     | synaptojanin 2                                              | 1.71      |
| 216186_at   | C1orf20   | chromosome 1 open reading<br>frame 20                       | -<br>1.33 |

|             |        |                                                                                              |           |
|-------------|--------|----------------------------------------------------------------------------------------------|-----------|
| 216190_x_at | ITGB1  | integrin, beta 1 (fibronectin receptor, beta polypeptide, antigen CD29 includes MDF2, MSK12) | 1.12      |
| 216202_s_at | SPTLC2 | serine palmitoyltransferase, long chain base subunit 2                                       | 1.52      |
| 216204_at   | COMT   | catechol-O-methyltransferase                                                                 | -<br>1.35 |
| 216206_x_at | MAP2K7 | mitogen-activated protein kinase kinase 7                                                    | -<br>2.07 |
| 216210_x_at | TRIOBP | TRIO and F-actin binding protein                                                             | 1.71      |
| 216216_at   | SLIT3  | slit homolog 3 (Drosophila)                                                                  | -1.2      |
| 216220_s_at | ADORA1 | adenosine A1 receptor                                                                        | -<br>1.81 |
| 216246_at   |        | NA                                                                                           | 1.43      |



|             |         |                                                                                     |           |
|-------------|---------|-------------------------------------------------------------------------------------|-----------|
| 216252_x_at | FAS     | Fas (TNF receptor superfamily, member 6)                                            | 2.04      |
| 216262_s_at | TGIF2   | TGFB-induced factor homeobox 2                                                      | -<br>1.51 |
| 216266_s_at | ARFGEF1 | ADP-ribosylation factor guanine nucleotide-exchange factor 1(brefeldin A-inhibited) | 1.58      |
| 216290_x_at | DPP6    | dipeptidyl-peptidase 6                                                              | -<br>1.47 |
| 216293_at   | CLTA    | clathrin, light chain (Lca)                                                         | -<br>1.39 |
| 216301_at   |         | NA                                                                                  | -1.7      |
| 216304_x_at | YME1L1  | YME1-like 1 ( <i>S. cerevisiae</i> )                                                | 1.47      |

|             |           |                                                                          |           |
|-------------|-----------|--------------------------------------------------------------------------|-----------|
| 216340_s_at | CYP2A7P1  | cytochrome P450, family 2,<br>subfamily A, polypeptide 7<br>pseudogene 1 | -<br>1.43 |
| 216366_x_at |           | NA                                                                       | -<br>1.52 |
| 216380_x_at | LOC728453 | similar to 40S ribosomal protein<br>S28                                  | -<br>1.37 |
| 216395_at   | FBXL18    | F-box and leucine-rich repeat<br>protein 18                              | -<br>1.53 |
| 216450_x_at | HSP90B1   | heat shock protein 90kDa beta<br>(Grp94), member 1                       | 4.1       |
| 216455_at   | FLJ00049  | FLJ00049 protein                                                         | -<br>1.34 |
| 216479_at   | LOC387753 | similar to 60S ribosomal protein<br>L21                                  | -<br>1.56 |
| 216483_s_at | C19orf10  | chromosome 19 open reading<br>frame 10                                   | 1.9       |

|             |           |                                                                                                 |           |
|-------------|-----------|-------------------------------------------------------------------------------------------------|-----------|
| 216490_x_at | LOC442175 | similar to 60S acidic ribosomal protein P2 (NY-REN-44 antigen)                                  | -<br>1.52 |
| 216491_x_at | IGHM      | immunoglobulin heavy constant mu                                                                | 3.82      |
| 216499_at   |           | NA                                                                                              | -<br>1.42 |
| 216503_s_at | MLLT10    | myeloid/lymphoid or mixed-lineage leukemia (trithorax homolog, Drosophila); translocated to, 10 | 1.31      |
| 216510_x_at | ZCWPW2    | zinc finger, CW type with PWWP domain 2                                                         | 3.22      |
| 216511_s_at | TCF7L2    | transcription factor 7-like 2 (T-cell specific, HMG-box)                                        | 1.74      |
| 216535_at   | CADM3     | cell adhesion molecule 3                                                                        | -         |

|             |           |                                                                                                                                                                                                              |           |
|-------------|-----------|--------------------------------------------------------------------------------------------------------------------------------------------------------------------------------------------------------------|-----------|
|             |           |                                                                                                                                                                                                              | 1.63      |
| 216541_x_at | IGHV1-69  | immunoglobulin heavy variable<br>1-69                                                                                                                                                                        | 1.64      |
| 216546_s_at | CHI3L1    | chitinase 3-like 1 (cartilage<br>glycoprotein-39)                                                                                                                                                            | -<br>1.41 |
| 216557_x_at | IFI6      | interferon, alpha-inducible<br>protein 6                                                                                                                                                                     | 2.3       |
| 216559_x_at | LOC120364 | similar to Heterogeneous nuclear<br>ribonucleoprotein A1 (Helix-<br>destabilizing protein) (Single-<br>strand binding protein) (hnRNP<br>core protein A1) (HDP-1)<br>(Topoisomerase-inhibitor<br>suppressed) | -<br>1.43 |

|             |          |                                                         |           |
|-------------|----------|---------------------------------------------------------|-----------|
| 216563_at   | ANKRD12  | ankyrin repeat domain 12                                | 2.22      |
| 216606_x_at | LYPLA2P1 | lysophospholipase II pseudogene<br>1                    | -<br>1.41 |
| 216641_s_at | LAD1     | ladinin 1                                               | 1.4       |
| 216656_at   |          | NA                                                      | -<br>1.51 |
| 216658_at   |          | NA                                                      | -<br>1.76 |
| 216668_at   |          | NA                                                      | -<br>1.56 |
| 216671_x_at | MUC8     | mucin 8                                                 | -<br>1.64 |
| 216678_at   | IFT122   | intraflagellar transport 122<br>homolog (Chlamydomonas) | -<br>1.56 |
| 216688_at   | SH3TC1   | SH3 domain and<br>tetratricopeptide repeats 1           | -<br>1.33 |
| 216694_at   |          | NA                                                      | -<br>1.39 |

|             |         |                                                                                   |           |
|-------------|---------|-----------------------------------------------------------------------------------|-----------|
| 216698_x_at | OR7E47P | olfactory receptor, family 7,<br>subfamily E, member 47<br>pseudogene             | -<br>1.66 |
| 216726_at   | VENTXP1 | VENT homeobox (Xenopus<br>laevis) pseudogene 1                                    | -<br>1.23 |
| 216747_at   | APBB2   | amyloid beta (A4) precursor<br>protein-binding, family B,<br>member 2 (Fe65-like) | -<br>1.85 |
| 216771_at   |         | NA                                                                                | -<br>1.29 |
| 216776_at   | BCAP29  | B-cell receptor-associated<br>protein 29                                          | -<br>1.26 |
| 216789_at   |         | NA                                                                                | -<br>1.74 |
| 216792_at   |         | NA                                                                                | -<br>1.27 |
| 216797_at   |         | NA                                                                                | -<br>1.24 |
| 216800_at   |         | NA                                                                                | -         |

|             |         |                                                                            |           |
|-------------|---------|----------------------------------------------------------------------------|-----------|
|             |         |                                                                            | 1.23      |
| 216832_at   | RUNX1T1 | runt-related transcription factor 1; translocated to, 1 (cyclin D-related) | -<br>1.43 |
| 216843_x_at | PMS2L1  | postmeiotic segregation increased 2-like 1                                 | 1.39      |
| 216844_at   | ZC3H7B  | zinc finger CCCH-type containing 7B                                        | -<br>1.66 |
| 216912_at   | ARHGEF4 | Rho guanine nucleotide exchange factor (GEF) 4                             | -1.5      |
| 216935_at   | C1orf46 | chromosome 1 open reading frame 46                                         | -<br>1.37 |
| 216943_at   |         | NA                                                                         | -<br>1.36 |
| 216959_x_at | NRCAM   | neuronal cell adhesion molecule                                            | -<br>1.34 |
| 216963_s_at | GAP43   | growth associated protein 43                                               | -<br>1.78 |

|             |        |                                                       |      |
|-------------|--------|-------------------------------------------------------|------|
| 216977_x_at | SNRPA1 | small nuclear ribonucleoprotein<br>polypeptide A'     | 1.78 |
| 217018_at   |        | NA                                                    | -1.2 |
| 217019_at   |        | NA                                                    | -    |
| 217030_at   |        | NA                                                    | 1.43 |
| 217039_x_at | IGHG1  | immunoglobulin heavy constant<br>gamma 1 (G1m marker) | -1.5 |
| 217040_x_at | SOX15  | SRY (sex determining region<br>Y)-box 15              | -    |
| 217041_at   | NPTXR  | neuronal pentraxin receptor                           | 1.53 |
| 217055_x_at |        | NA                                                    | -    |
| 217062_at   | DMPK   | dystrophia myotonica-protein<br>kinase                | 1.89 |
| 217071_s_at | MTHFR  | 5,10-methylenetetrahydrofolate<br>reductase (NADPH)   | -    |
| 217072_at   | CD300A | CD300a molecule                                       | 1.64 |
|             |        |                                                       | -    |
|             |        |                                                       | 1.35 |



|             |           |                                        |      |
|-------------|-----------|----------------------------------------|------|
| 217074_at   | SMOX      | spermine oxidase                       | 1.74 |
|             |           | natural cytotoxicity triggering        | -    |
| 217095_x_at | NCR1      | receptor 1                             | 1.36 |
|             |           | calcium/calmodulin-dependent           | -    |
| 217128_s_at | CAMK1G    | protein kinase IG                      | 1.33 |
|             |           | similar to Elongation FacTor           | -    |
| 217142_at   | LOC442215 | family member (eft-4)                  | 1.42 |
|             |           |                                        | -    |
| 217144_at   | LOC648390 | similar to ubiquitin B precursor       | 2.19 |
|             |           |                                        | -    |
| 217153_at   | ARHGAP1   | Rho GTPase activating protein 1        | 1.21 |
|             |           |                                        | -    |
| 217163_at   | ESR1      | estrogen receptor 1                    | 1.27 |
|             |           |                                        | -    |
| 217208_s_at | DLG1      | discs, large homolog 1<br>(Drosophila) | 1.44 |
| 217216_x_at | MLH3      | mutL homolog 3 (E. coli)               | 1.37 |
| 217234_s_at | VIL2      | villin 2 (ezrin)                       | 1.98 |
|             |           | DiGeorge syndrome critical             | -    |
| 217275_at   | DGCR14    | region gene 14                         | 1.39 |

|             |           |                                                                             |      |
|-------------|-----------|-----------------------------------------------------------------------------|------|
|             |           |                                                                             |      |
| 217286_s_at | NDRG3     | NDRG family member 3                                                        | 1.49 |
| 217325_at   | KRT3      | keratin 3                                                                   | 2.04 |
| 217336_at   | LOC133569 | similar to ribosomal protein S10                                            | 1.58 |
| 217341_at   | DNM1      | dynamamin 1                                                                 | 1.66 |
| 217393_x_at | UBE2NL    | ubiquitin-conjugating enzyme<br>E2N-like                                    | 1.32 |
| 217401_at   |           | NA                                                                          | 1.38 |
| 217403_s_at | ZNF227    | zinc finger protein 227                                                     | 1.26 |
| 217408_at   | MRPS18B   | mitochondrial ribosomal protein<br>S18B                                     | 1.65 |
| 217427_s_at | HIRA      | HIR histone cell cycle regulation<br>defective homolog A (S.<br>cerevisiae) | 1.91 |

|             |           |                                                                                             |           |
|-------------|-----------|---------------------------------------------------------------------------------------------|-----------|
| 217436_x_at | LOC730399 | hypothetical protein LOC730399                                                              | 2.12      |
| 217446_x_at |           | NA                                                                                          | -<br>2.09 |
| 217492_s_at | PTENP1    | phosphatase and tensin homolog<br>(mutated in multiple advanced<br>cancers 1), pseudogene 1 | 1.9       |
| 217495_x_at | CALCA     | calcitonin/calcitonin-related<br>polypeptide, alpha                                         | -<br>1.75 |
| 217506_at   | LOC400642 | hypothetical gene supported by<br>BC041875; BX648984                                        | 2.01      |
| 217510_at   | CRX       | cone-rod homeobox                                                                           | -<br>1.34 |
| 217589_at   | RAB40A    | RAB40A, member RAS<br>oncogene family                                                       | -<br>1.33 |

|             |        |                                                          |           |
|-------------|--------|----------------------------------------------------------|-----------|
|             |        |                                                          |           |
| 217596_at   | UPF3A  | UPF3 regulator of nonsense transcripts homolog A (yeast) | -<br>1.21 |
| 217606_at   |        | NA                                                       | -<br>1.38 |
| 217646_at   | SURF1  | surfeit 1                                                | -<br>1.19 |
| 217679_x_at |        | NA                                                       | -<br>2.64 |
| 217688_at   | ADCY2  | adenylate cyclase 2 (brain)                              | -<br>1.66 |
| 217702_at   | IL27RA | interleukin 27 receptor, alpha                           | -<br>2.07 |
| 217703_x_at | SPON1  | spondin 1, extracellular matrix protein                  | -<br>1.71 |
| 217706_at   | LRRC51 | leucine rich repeat containing 51                        | -<br>1.78 |

|             |         |                                                                                               |           |
|-------------|---------|-----------------------------------------------------------------------------------------------|-----------|
| 217711_at   | TEK     | TEK tyrosine kinase, endothelial<br>(venous malformations, multiple<br>cutaneous and mucosal) | -<br>1.96 |
| 217716_s_at | SEC61A1 | Sec61 alpha 1 subunit (S.<br>cerevisiae)                                                      | 1.64      |
| 217747_s_at | RPS9    | ribosomal protein S9                                                                          | 1.55      |
| 217755_at   | HN1     | hematological and neurological<br>expressed 1                                                 | 1.45      |
| 217797_at   | UFC1    | ubiquitin-fold modifier<br>conjugating enzyme 1                                               | 1.53      |
| 217799_x_at | UBE2H   | ubiquitin-conjugating enzyme<br>E2H (UBC8 homolog, yeast)                                     | -1.5      |

|             |         |                                                            |      |
|-------------|---------|------------------------------------------------------------|------|
| 217808_s_at | MAPKAP1 | mitogen-activated protein kinase associated protein 1      | 1.63 |
| 217814_at   | CCDC47  | coiled-coil domain containing 47                           | 2.07 |
| 217821_s_at | WBP11   | WW domain binding protein 11                               | 1.88 |
| 217822_at   | WBP11   | WW domain binding protein 11                               | 1.6  |
| 217831_s_at | NSFL1C  | NSFL1 (p97) cofactor (p47)                                 | 1.4  |
| 217832_at   | SYNCRIP | synaptotagmin binding, cytoplasmic RNA interacting protein | 1.86 |
| 217840_at   | DDX41   | DEAD (Asp-Glu-Ala-Asp) box polypeptide 41                  | 1.53 |
| 217848_s_at | PPA1    | pyrophosphatase (inorganic) 1                              | 1.68 |
| 217856_at   | RBM8A   | RNA binding motif protein 8A                               | 1.33 |
| 217861_s_at | PREB    | prolactin regulatory element binding                       | 1.78 |

|             |           |                                                                         |      |
|-------------|-----------|-------------------------------------------------------------------------|------|
| 217890_s_at | PARVA     | parvin, alpha                                                           | 1.52 |
| 217898_at   | C15orf24  | chromosome 15 open reading<br>frame 24                                  | 1.9  |
| 217907_at   | MRPL18    | mitochondrial ribosomal protein<br>L18                                  | 1.61 |
| 217917_s_at | DYNLRB1   | dynein, light chain, roadblock-<br>type 1                               | 2.22 |
| 217919_s_at | MRPL42    | mitochondrial ribosomal protein<br>L42                                  | 2.57 |
| 217926_at   | C19orf53  | chromosome 19 open reading<br>frame 53                                  | 1.49 |
| 217933_s_at | LAP3      | leucine aminopeptidase 3                                                | 1.54 |
| 217940_s_at | FLJ10769  | hypothetical protein FLJ10769                                           | 1.52 |
| 217962_at   | NOLA3     | nucleolar protein family A,<br>member 3 (H/ACA small<br>nucleolar RNPs) | 1.71 |
| 217971_at   | MAP2K1IP1 | mitogen-activated protein kinase<br>kinase 1 interacting protein 1      | 1.79 |

|             |         |                                                             |      |
|-------------|---------|-------------------------------------------------------------|------|
| 217978_s_at | UBE2Q1  | ubiquitin-conjugating enzyme<br>E2Q (putative) 1            | 1.96 |
| 217980_s_at | MRPL16  | mitochondrial ribosomal protein<br>L16                      | 1.6  |
| 217983_s_at | RNASET2 | ribonuclease T2                                             | 2.3  |
| 217990_at   | GMPR2   | guanosine monophosphate<br>reductase 2                      | 1.9  |
| 217992_s_at | EFHD2   | EF-hand domain family,<br>member D2                         | 1.47 |
| 217995_at   | SQRDL   | sulfide quinone reductase-like<br>(yeast)                   | 1.72 |
| 218008_at   | C7orf42 | chromosome 7 open reading<br>frame 42                       | 1.56 |
| 218014_at   | NUP85   | nucleoporin 85kDa                                           | 1.55 |
| 218016_s_at | POLR3E  | polymerase (RNA) III (DNA<br>directed) polypeptide E (80kD) | 1.75 |
| 218020_s_at | ZFAND3  | zinc finger, AN1-type domain 3                              | 1.61 |



|             |           |                                                                                |      |
|-------------|-----------|--------------------------------------------------------------------------------|------|
| 218028_at   | ELOVL1    | elongation of very long chain fatty acids (FEN1/Elo2, SUR4/Elo3, yeast)-like 1 | 2.07 |
| 218052_s_at | ATP13A1   | ATPase type 13A1                                                               | 1.5  |
| 218057_x_at | COX4NB    | COX4 neighbor                                                                  | 1.79 |
| 218059_at   | ZNF706    | zinc finger protein 706                                                        | 1.84 |
| 218061_at   | MEA1      | male-enhanced antigen 1                                                        | 1.39 |
| 218074_at   | FAM96B    | family with sequence similarity 96, member B                                   | 1.87 |
| 218084_x_at | FXYD5     | FXYD domain containing ion transport regulator 5                               | 1.85 |
| 218097_s_at | CUEDC2    | CUE domain containing 2                                                        | 1.75 |
| 218105_s_at | MRPL4     | mitochondrial ribosomal protein L4                                             | 1.59 |
| 218108_at   | C14orf130 | chromosome 14 open reading frame 130                                           | 1.81 |
| 218129_s_at | NFYB      | nuclear transcription factor Y, beta                                           | 2    |

|             |          |                                                                                               |      |
|-------------|----------|-----------------------------------------------------------------------------------------------|------|
| 218157_x_at | CDC42SE1 | CDC42 small effector 1                                                                        | 2.07 |
| 218160_at   | NDUFA8   | NADH dehydrogenase<br>(ubiquinone) 1 alpha<br>subcomplex, 8, 19kDa                            | 1.79 |
| 218190_s_at | UCRC     | ubiquinol-cytochrome c<br>reductase complex (7.2 kD)                                          | 1.62 |
| 218193_s_at | GOLT1B   | golgi transport 1 homolog B (S.<br>cerevisiae)                                                | 1.86 |
| 218209_s_at | P15RS    | hypothetical protein FLJ10656                                                                 | 1.63 |
| 218216_x_at | ARL6IP4  | ADP-ribosylation-like factor 6<br>interacting protein 4                                       | 1.45 |
| 218218_at   | APPL2    | adaptor protein, phosphotyrosine<br>interaction, PH domain and<br>leucine zipper containing 2 | 1.62 |

|             |          |                                                         |      |
|-------------|----------|---------------------------------------------------------|------|
| 218220_at   | C12orf10 | chromosome 12 open reading<br>frame 10                  | 1.42 |
| 218227_at   | NUBP2    | nucleotide binding protein 2<br>(MinD homolog, E. coli) | 1.53 |
| 218231_at   | NAGK     | N-acetylglucosamine kinase                              | 1.5  |
| 218232_at   | C1QA     | complement component 1, q<br>subcomponent, A chain      | 2.25 |
| 218233_s_at | C6orf49  | chromosome 6 open reading<br>frame 49                   | 1.58 |
| 218249_at   | ZDHHC6   | zinc finger, DHHC-type<br>containing 6                  | 1.49 |
| 218260_at   | C19orf58 | chromosome 19 open reading<br>frame 58                  | 2.13 |
| 218264_at   | BCCIP    | BRCA2 and CDKN1A<br>interacting protein                 | 1.56 |
| 218270_at   | MRPL24   | mitochondrial ribosomal protein<br>L24                  | 1.57 |

|             |          |                                                                     |           |
|-------------|----------|---------------------------------------------------------------------|-----------|
| 218278_at   | WDR74    | WD repeat domain 74                                                 | -<br>1.63 |
| 218297_at   | C10orf97 | chromosome 10 open reading<br>frame 97                              | 1.34      |
| 218299_at   | C11orf24 | chromosome 11 open reading<br>frame 24                              | 1.91      |
| 218307_at   | RSAD1    | radical S-adenosyl methionine<br>domain containing 1                | -<br>1.49 |
| 218312_s_at | ZSCAN18  | zinc finger and SCAN domain<br>containing 18                        | 1.9       |
| 218315_s_at | CDK5RAP1 | CDK5 regulatory subunit<br>associated protein 1                     | 1.54      |
| 218316_at   | TIMM9    | translocase of inner<br>mitochondrial membrane 9<br>homolog (yeast) | 1.41      |
| 218343_s_at | GTF3C3   | general transcription factor IIIC,<br>polypeptide 3, 102kDa         | 1.94      |

|             |         |                                                                                       |      |
|-------------|---------|---------------------------------------------------------------------------------------|------|
| 218344_s_at | RCOR3   | REST corepressor 3                                                                    | 1.64 |
| 218352_at   | RCBTB1  | regulator of chromosome condensation (RCC1) and BTB (POZ) domain containing protein 1 | 1.81 |
| 218356_at   | FTSJ2   | FtsJ homolog 2 (E. coli)                                                              | 1.69 |
| 218370_s_at | S100PBP | S100P binding protein                                                                 | 1.63 |
| 218371_s_at | PSPC1   | paraspeckle component 1                                                               | 1.75 |
| 218375_at   | NUDT9   | nudix (nucleoside diphosphate linked moiety X)-type motif 9                           | 1.63 |
| 218398_at   | MRPS30  | mitochondrial ribosomal protein S30                                                   | 2.15 |
| 218423_x_at | VPS54   | vacuolar protein sorting 54 homolog (S. cerevisiae)                                   | 1.8  |
| 218439_s_at | COMMD10 | COMM domain containing 10                                                             | 1.95 |

|             |           |                                                                           |      |
|-------------|-----------|---------------------------------------------------------------------------|------|
| 218462_at   | BXDC5     | brix domain containing 5                                                  | 1.81 |
| 218467_at   | TNFSF5IP1 | tumor necrosis factor<br>superfamily, member 5-induced<br>protein 1       | 1.47 |
| 218470_at   | YARS2     | tyrosyl-tRNA synthetase 2,<br>mitochondrial                               | 1.25 |
| 218472_s_at | PELO      | pelota homolog (Drosophila)                                               | 2.25 |
| 218483_s_at | C11orf60  | chromosome 11 open reading<br>frame 60                                    | 1.31 |
| 218488_at   | EIF2B3    | eukaryotic translation initiation<br>factor 2B, subunit 3 gamma,<br>58kDa | 1.57 |
| 218495_at   | UXT       | ubiquitously-expressed<br>transcript                                      | 1.67 |
| 218512_at   | WDR12     | WD repeat domain 12                                                       | 1.62 |
| 218519_at   | SLC35A5   | solute carrier family 35, member<br>A5                                    | 1.8  |

|             |              |                                                             |           |
|-------------|--------------|-------------------------------------------------------------|-----------|
| 218520_at   | TBK1         | TANK-binding kinase 1                                       | 1.46      |
| 218526_s_at | RANGRF       | RAN guanine nucleotide release factor                       | 1.66      |
| 218551_at   | RP5-1077B9.4 | invasion inhibitory protein 45                              | -<br>1.83 |
| 218561_s_at | LYRM4        | LYR motif containing 4                                      | 1.47      |
| 218563_at   | NDUFA3       | NADH dehydrogenase (ubiquinone) 1 alpha subcomplex, 3, 9kDa | 1.49      |
| 218576_s_at | DUSP12       | dual specificity phosphatase 12                             | 1.44      |
| 218594_at   | HEATR1       | HEAT repeat containing 1                                    | 1.76      |
| 218606_at   | ZDHHC7       | zinc finger, DHHC-type containing 7                         | 1.5       |

|             |          |                                                                 |      |
|-------------|----------|-----------------------------------------------------------------|------|
|             |          | tumor suppressing                                               | -    |
| 218612_s_at | TSSC4    | subtransferable candidate 4                                     | 1.35 |
| 218615_s_at | TMEM39A  | transmembrane protein 39A                                       | 1.43 |
| 218616_at   | INTS12   | integrator complex subunit 12                                   | 1.99 |
| 218622_at   | NUP37    | nucleoporin 37kDa                                               | 1.79 |
| 218628_at   | CCDC53   | coiled-coil domain containing 53                                | 1.6  |
| 218630_at   | MKS1     | Meckel syndrome, type 1                                         | -    |
| 218651_s_at | LARP6    | La ribonucleoprotein domain<br>family, member 6                 | 1.43 |
| 218654_s_at | MRPS33   | mitochondrial ribosomal protein<br>S33                          | 1.7  |
| 218661_at   | FLJ14154 | hypothetical protein FLJ14154                                   | 1.34 |
| 218679_s_at | VPS28    | vacuolar protein sorting 28<br>homolog ( <i>S. cerevisiae</i> ) | 1.65 |



|             |          |                                                                            |      |
|-------------|----------|----------------------------------------------------------------------------|------|
| 218681_s_at | SDF2L1   | stromal cell-derived factor 2-like<br>1                                    | 1.68 |
| 218682_s_at | SLC4A1AP | solute carrier family 4 (anion<br>exchanger), member 1, adaptor<br>protein | 1.45 |
| 218686_s_at | RHBDF1   | rhomboid 5 homolog 1<br>(Drosophila)                                       | 1.48 |
| 218711_s_at | SDPR     | serum deprivation response<br>(phosphatidylserine binding<br>protein)      | 2.3  |
| 218715_at   | UTP6     | UTP6, small subunit (SSU)<br>processome component,<br>homolog (yeast)      | 1.5  |
| 218718_at   | PDGFC    | platelet derived growth factor C                                           | 1.82 |
| 218722_s_at | CCDC51   | coiled-coil domain containing 51                                           | 1.45 |
| 218746_at   | TAPBPL   | TAP binding protein-like                                                   | 1.91 |

|             |        |                                                                   |           |
|-------------|--------|-------------------------------------------------------------------|-----------|
| 218761_at   | RNF111 | ring finger protein 111                                           | 2.12      |
| 218769_s_at | ANKRA2 | ankyrin repeat, family A<br>(RFXANK-like), 2                      | 1.65      |
| 218812_s_at | ORAI2  | ORAI calcium release-activated<br>calcium modulator 2             | -<br>1.29 |
| 218817_at   | SPCS3  | signal peptidase complex<br>subunit 3 homolog (S.<br>cerevisiae)  | 1.58      |
| 218827_s_at | CEP192 | centrosomal protein 192kDa                                        | 1.35      |
| 218829_s_at | CHD7   | chromodomain helicase DNA<br>binding protein 7                    | 1.5       |
| 218841_at   | ASB8   | ankyrin repeat and SOCS box-<br>containing 8                      | -<br>1.39 |
| 218863_s_at | TNS1   | tensin 1                                                          | -1.9      |
| 218866_s_at | POLR3K | polymerase (RNA) III (DNA<br>directed) polypeptide K, 12.3<br>kDa | 1.5       |

|             |          |                                                            |           |
|-------------|----------|------------------------------------------------------------|-----------|
| 218916_at   | ZNF768   | zinc finger protein 768                                    | -<br>1.75 |
| 218922_s_at | LASS4    | LAG1 homolog, ceramide<br>synthase 4                       | -<br>1.63 |
| 218932_at   | C1orf181 | chromosome 1 open reading<br>frame 181                     | 2.03      |
| 218943_s_at | DDX58    | DEAD (Asp-Glu-Ala-Asp) box<br>polypeptide 58               | 1.66      |
| 218949_s_at | QRSL1    | glutaminyl-tRNA synthase<br>(glutamine-hydrolyzing)-like 1 | 1.31      |
| 218959_at   | HOXC10   | homeobox C10                                               | -<br>1.38 |
| 218966_at   | MYO5C    | myosin VC                                                  | 1.74      |
| 218978_s_at | SLC25A37 | solute carrier family 25, member<br>37                     | -<br>1.24 |
| 218986_s_at | FLJ20035 | hypothetical protein FLJ20035                              | 2.61      |

|             |          |                                                               |           |
|-------------|----------|---------------------------------------------------------------|-----------|
| 218987_at   | ATF7IP   | activating transcription factor 7<br>interacting protein      | 1.6       |
| 218999_at   | TMEM140  | transmembrane protein 140                                     | 1.82      |
| 219004_s_at | C21orf45 | chromosome 21 open reading<br>frame 45                        | -<br>1.35 |
| 219015_s_at | ALG13    | asparagine-linked glycosylation<br>13 homolog (S. cerevisiae) | 2.11      |
| 219029_at   | C5orf28  | chromosome 5 open reading<br>frame 28                         | 1.43      |
| 219030_at   | TPRKB    | TP53RK binding protein                                        | 2.48      |
| 219035_s_at | RNF34    | ring finger protein 34                                        | 1.96      |
| 219061_s_at | LAGE3    | L antigen family, member 3                                    | 1.32      |
| 219078_at   | GPATCH2  | G patch domain containing 2                                   | 1.46      |
| 219088_s_at | ZNF576   | zinc finger protein 576                                       | 1.26      |
| 219099_at   | C12orf5  | chromosome 12 open reading<br>frame 5                         | 1.71      |

|             |          |                                                            |           |
|-------------|----------|------------------------------------------------------------|-----------|
| 219103_at   | DDEFL1   | development and differentiation<br>enhancing factor-like 1 | -<br>1.34 |
| 219115_s_at | IL20RA   | interleukin 20 receptor, alpha                             | 1.28      |
| 219126_at   | PHF10    | PHD finger protein 10                                      | 1.44      |
| 219130_at   | CCDC76   | coiled-coil domain containing 76                           | 1.71      |
| 219146_at   | C17orf42 | chromosome 17 open reading<br>frame 42                     | 1.62      |
| 219151_s_at | RABL2B   | RAB, member of RAS oncogene<br>family-like 2B              | 1.58      |
| 219161_s_at | CKLF     | chemokine-like factor                                      | 2.03      |
| 219170_at   | FSD1     | fibronectin type III and SPRY<br>domain containing 1       | -<br>1.43 |
| 219186_at   | ZBTB7A   | zinc finger and BTB domain<br>containing 7A                | 1.47      |

|             |         |                                                |           |
|-------------|---------|------------------------------------------------|-----------|
|             |         |                                                | -         |
| 219187_at   | FKBPL   | FK506 binding protein like                     | 1.31      |
| 219192_at   | UBAP2   | ubiquitin associated protein 2                 | 2.02      |
| 219200_at   | FASTKD3 | FAST kinase domains 3                          | 1.82      |
| 219209_at   | IFIH1   | interferon induced with helicase<br>C domain 1 | 3.03      |
| 219211_at   | USP18   | ubiquitin specific peptidase 18                | 1.93      |
| 219212_at   | HSPA14  | heat shock 70kDa protein 14                    | 1.51      |
| 219224_x_at | ZNF408  | zinc finger protein 408                        | -<br>1.51 |
| 219249_s_at | FKBP10  | FK506 binding protein 10, 65<br>kDa            | -<br>1.29 |
| 219251_s_at | WDR60   | WD repeat domain 60                            | -<br>1.52 |
| 219279_at   | DOCK10  | dedicator of cytokinesis 10                    | 1.79      |

|             |           |                                              |           |
|-------------|-----------|----------------------------------------------|-----------|
| 219283_at   | C1GALT1C1 | C1GALT1-specific chaperone 1                 | 1.72      |
| 219288_at   | C3orf14   | chromosome 3 open reading<br>frame 14        | 1.75      |
| 219289_at   | HEATR3    | HEAT repeat containing 3                     | 1.51      |
| 219291_at   | DTWD1     | DTW domain containing 1                      | 1.46      |
| 219293_s_at | OLA1      | Obg-like ATPase 1                            | 1.5       |
| 219314_s_at | ZNF219    | zinc finger protein 219                      | -         |
| 219317_at   | POLI      | polymerase (DNA directed) iota               | 1.59      |
| 219319_at   | HIF3A     | hypoxia inducible factor 3, alpha<br>subunit | -<br>1.49 |
| 219337_at   | C1orf159  | chromosome 1 open reading<br>frame 159       | -<br>1.45 |
| 219342_at   | CASD1     | CAS1 domain containing 1                     | 1.68      |
| 219352_at   | HERC6     | hect domain and RLD 6                        | 2.22      |

|             |          |                                                                                                 |      |
|-------------|----------|-------------------------------------------------------------------------------------------------|------|
| 219372_at   | IFT81    | intraflagellar transport 81<br>homolog (Chlamydomonas)                                          | 1.54 |
| 219374_s_at | ALG9     | asparagine-linked glycosylation<br>9 homolog (S. cerevisiae, alpha-<br>1,2-mannosyltransferase) | 1.35 |
| 219402_s_at | DERL1    | Der1-like domain family,<br>member 1                                                            | 1.57 |
| 219406_at   | C1orf50  | chromosome 1 open reading<br>frame 50                                                           | 1.4  |
| 219425_at   | SULT4A1  | sulfotransferase family 4A,<br>member 1                                                         | -1.4 |
| 219426_at   | EIF2C3   | eukaryotic translation initiation<br>factor 2C, 3                                               | 1.69 |
| 219431_at   | ARHGAP10 | Rho GTPase activating protein<br>10                                                             | -1.4 |
| 219441_s_at | LRRK1    | leucine-rich repeat kinase 1                                                                    | 1.34 |
| 219470_x_at | CCNJ     | cyclin J                                                                                        | 1.38 |



|             |          |                                                     |           |
|-------------|----------|-----------------------------------------------------|-----------|
| 219548_at   | ZNF16    | zinc finger protein 16                              | -<br>1.32 |
| 219577_s_at | ABCA7    | ATP-binding cassette, sub-family A (ABC1), member 7 | -<br>1.47 |
| 219579_at   | RAB3IL1  | RAB3A interacting protein (rabin3)-like 1           | -<br>1.87 |
| 219593_at   | SLC15A3  | solute carrier family 15, member 3                  | 1.48      |
| 219605_at   | ZNF3     | zinc finger protein 3                               | -<br>1.32 |
| 219620_x_at | C9orf167 | chromosome 9 open reading frame 167                 | 1.33      |
| 219622_at   | RAB20    | RAB20, member RAS oncogene family                   | 1.59      |
| 219623_at   | ACTR5    | ARP5 actin-related protein 5 homolog (yeast)        | -<br>1.65 |

|             |           |                                                       |           |
|-------------|-----------|-------------------------------------------------------|-----------|
| 219646_at   | DEF8      | differentially expressed in FDCP<br>8 homolog (mouse) | 1.28      |
| 219648_at   | MREG      | melanoregulin                                         | 1.38      |
| 219652_s_at | CXorf36   | chromosome X open reading<br>frame 36                 | -<br>1.45 |
| 219679_s_at | WAC       | WW domain containing adaptor<br>with coiled-coil      | 2.32      |
| 219691_at   | SAMD9     | sterile alpha motif domain<br>containing 9            | 1.42      |
| 219707_at   | CPNE7     | copine VII                                            | -<br>1.43 |
| 219712_s_at | CARKL     | carbohydrate kinase-like                              | -1.3      |
| 219716_at   | APOL6     | apolipoprotein L, 6                                   | 1.92      |
| 219757_s_at | C14orf101 | chromosome 14 open reading<br>frame 101               | 1.81      |

|             |         |                                                              |           |
|-------------|---------|--------------------------------------------------------------|-----------|
| 219766_at   | MGC4093 | hypothetical protein MGC4093                                 | -1.5      |
| 219767_s_at | CRYZL1  | crystallin, zeta (quinone reductase)-like 1                  | 2.11      |
| 219770_at   | GTDC1   | glycosyltransferase-like domain containing 1                 | 1.43      |
| 219781_s_at | ZNF771  | zinc finger protein 771                                      | -<br>1.62 |
| 219809_at   | WDR55   | WD repeat domain 55                                          | -<br>1.44 |
| 219828_at   | C9orf86 | chromosome 9 open reading frame 86                           | -<br>1.31 |
| 219835_at   | PRDM8   | PR domain containing 8                                       | -<br>1.62 |
| 219847_at   | HDAC11  | histone deacetylase 11                                       | -<br>1.63 |
| 219855_at   | NUDT11  | nudix (nucleoside diphosphate linked moiety X)-type motif 11 | -<br>1.43 |

|             |         |                                                                 |           |
|-------------|---------|-----------------------------------------------------------------|-----------|
| 219893_at   | CCDC71  | coiled-coil domain containing 71                                | 1.32      |
| 219912_s_at | ENPP3   | ectonucleotide<br>pyrophosphatase/phosphodiester<br>ase 3       | -<br>1.38 |
| 219913_s_at | CRNKL1  | crooked neck pre-mRNA<br>splicing factor-like 1<br>(Drosophila) | 1.74      |
| 219931_s_at | KLHL12  | kelch-like 12 (Drosophila)                                      | 1.31      |
| 219940_s_at | PCID2   | PCI domain containing 2                                         | 1.3       |
| 219946_x_at | MYH14   | myosin, heavy chain 14                                          | -<br>1.86 |
| 219963_at   | DUSP13  | dual specificity phosphatase 13                                 | -<br>1.38 |
| 219964_at   | ST7L    | suppression of tumorigenicity 7<br>like                         | -<br>1.48 |
| 220000_at   | SIGLEC5 | sialic acid binding Ig-like lectin<br>5                         | -<br>1.23 |

|             |         |                                                                      |           |
|-------------|---------|----------------------------------------------------------------------|-----------|
| 220003_at   | LRRC36  | leucine rich repeat containing 36                                    | -<br>1.46 |
| 220008_at   | SGK269  | NKF3 kinase family member                                            | -1.5      |
| 220015_at   | CASZ1   | castor zinc finger 1                                                 | -<br>1.77 |
| 220042_x_at | HIVEP3  | human immunodeficiency virus<br>type I enhancer binding protein<br>3 | -<br>1.47 |
| 220045_at   | NEUROD6 | neurogenic differentiation 6                                         | -<br>1.27 |
| 220051_at   | PRSS21  | protease, serine, 21 (testisin)                                      | -<br>1.48 |
| 220068_at   | VPREB3  | pre-B lymphocyte gene 3                                              | -<br>1.26 |
| 220127_s_at | FBXL12  | F-box and leucine-rich repeat<br>protein 12                          | 1.6       |

|             |          |                                                           |           |
|-------------|----------|-----------------------------------------------------------|-----------|
| 220152_at   | C10orf95 | chromosome 10 open reading<br>frame 95                    | -<br>1.53 |
| 220155_s_at | BRD9     | bromodomain containing 9                                  | -<br>1.39 |
| 220192_x_at | SPDEF    | SAM pointed domain containing<br>ets transcription factor | -<br>1.51 |
| 220202_s_at | RC3H2    | ring finger and CCCH-type zinc<br>finger domains 2        | -<br>1.63 |
| 220209_at   | PYY2     | peptide YY, 2 (seminalplasmin)                            | -<br>1.84 |
| 220238_s_at | KLHL7    | kelch-like 7 (Drosophila)                                 | -<br>1.18 |
| 220245_at   | SLC45A2  | solute carrier family 45, member<br>2                     | -<br>1.33 |
| 220248_x_at | NSFL1C   | NSFL1 (p97) cofactor (p47)                                | -<br>1.65 |
| 220262_s_at | DLK2     | delta-like 2 homolog<br>(Drosophila)                      | -<br>1.39 |
| 220265_at   | GPR107   | G protein-coupled receptor 107                            | -<br>1.13 |

|             |          |                                                                   |      |
|-------------|----------|-------------------------------------------------------------------|------|
|             |          |                                                                   | -    |
| 220273_at   | IL17B    | interleukin 17B                                                   | 1.58 |
| 220277_at   | CXXC4    | CXXC finger 4                                                     | 1.22 |
|             |          |                                                                   | -    |
| 220288_at   | MYO15A   | myosin XVA                                                        | 1.34 |
|             |          |                                                                   | -    |
| 220291_at   | GDPD2    | glycerophosphodiester<br>phosphodiesterase domain<br>containing 2 | 1.31 |
|             |          |                                                                   | -    |
| 220310_at   | TUBAL3   | tubulin, alpha-like 3                                             | 1.23 |
|             |          |                                                                   | -    |
| 220314_at   | HSFX1    | heat shock transcription factor<br>family, X linked 1             | 1.53 |
|             |          |                                                                   | -    |
| 220326_s_at | FLJ10357 | hypothetical protein FLJ10357                                     | 1.48 |
|             |          |                                                                   | -    |
| 220332_at   | CLDN16   | claudin 16                                                        | 1.37 |
|             |          |                                                                   | -    |
| 220337_at   | NGB      | neuroglobin                                                       | 1.84 |
|             |          |                                                                   | -    |
| 220344_at   | C11orf16 | chromosome 11 open reading<br>frame 16                            | 1.74 |

|             |          |                                                                        |           |
|-------------|----------|------------------------------------------------------------------------|-----------|
| 220386_s_at | EML4     | echinoderm microtubule associated protein like 4                       | 2.01      |
| 220390_at   | AGBL2    | ATP/GTP binding protein-like 2                                         | 1.14      |
| 220395_at   | DNAJA4   | DnaJ (Hsp40) homolog, subfamily A, member 4                            | -<br>1.92 |
| 220427_at   | OBSCN    | obscurin, cytoskeletal calmodulin and titin-interacting RhoGEF         | -<br>1.46 |
| 220443_s_at | VAX2     | ventral anterior homeobox 2                                            | -<br>1.55 |
| 220455_at   | SLC16A8  | solute carrier family 16, member 8 (monocarboxylic acid transporter 3) | -<br>1.59 |
| 220465_at   | FLJ12355 | hypothetical protein FLJ12355                                          | -<br>1.59 |



|             |          |                                                          |           |
|-------------|----------|----------------------------------------------------------|-----------|
| 220469_at   | COPE     | coatomer protein complex,<br>subunit epsilon             | -<br>1.51 |
| 220485_s_at | SIRPG    | signal-regulatory protein gamma                          | -1.5      |
| 220494_s_at |          | NA                                                       | 2.93      |
| 220498_at   | ACTL7B   | actin-like 7B                                            | -<br>1.61 |
| 220522_at   | CRB1     | crumbs homolog 1 (Drosophila)                            | -<br>1.18 |
| 220525_s_at | AUP1     | ancient ubiquitous protein 1                             | 1.58      |
| 220537_at   | MTMR8    | myotubularin related protein 8                           | -<br>1.23 |
| 220561_at   | IGF2AS   | insulin-like growth factor 2<br>antisense                | -1.6      |
| 220562_at   | CYP2W1   | cytochrome P450, family 2,<br>subfamily W, polypeptide 1 | -<br>1.82 |
| 220581_at   | C6orf97  | chromosome 6 open reading<br>frame 97                    | -<br>1.18 |
| 220583_at   | FLJ22596 | hypothetical protein FLJ22596                            | -<br>1.42 |

|             |          |                                                                                                |           |
|-------------|----------|------------------------------------------------------------------------------------------------|-----------|
| 220588_at   | BCAS4    | breast carcinoma amplified<br>sequence 4                                                       | -<br>1.26 |
| 220599_s_at | CARD14   | caspase recruitment domain<br>family, member 14                                                | -1.4      |
| 220605_s_at | SIRT2    | sirtuin (silent mating type<br>information regulation 2<br>homolog) 2 ( <i>S. cerevisiae</i> ) | 1.48      |
| 220607_x_at | TH1L     | TH1-like ( <i>Drosophila</i> )                                                                 | 1.55      |
| 220635_at   | PSORS1C2 | psoriasis susceptibility 1<br>candidate 2                                                      | -<br>1.73 |
| 220642_x_at | GPR89B   | G protein-coupled receptor 89B                                                                 | 1.62      |
| 220645_at   | FAM55D   | family with sequence similarity<br>55, member D                                                | -<br>1.27 |
| 220653_at   | ZIM2     | zinc finger, imprinted 2                                                                       | -1.4      |

|             |         |                                                            |           |
|-------------|---------|------------------------------------------------------------|-----------|
| 220690_s_at | DHRS7B  | dehydrogenase/reductase (SDR family) member 7B             | 1.62      |
| 220706_at   | ADAMTS7 | ADAM metalloproteinase with thrombospondin type 1 motif, 7 | -<br>1.36 |
| 220755_s_at | C6orf48 | chromosome 6 open reading frame 48                         | 1.84      |
| 220756_s_at | GPR172B | G protein-coupled receptor 172B                            | -<br>1.52 |
| 220780_at   | PLA2G3  | phospholipase A2, group III                                | -<br>1.53 |
| 220796_x_at | SLC35E1 | solute carrier family 35, member E1                        | -<br>2.53 |
| 220798_x_at | PRG2    | plasticity-related gene 2                                  | -<br>2.64 |
| 220846_s_at | PRKCZ   | protein kinase C, zeta                                     | -<br>1.29 |
| 220890_s_at | DDX47   | DEAD (Asp-Glu-Ala-Asp) box polypeptide 47                  | 1.54      |

|             |         |                                                                             |           |
|-------------|---------|-----------------------------------------------------------------------------|-----------|
| 220917_s_at | WDR19   | WD repeat domain 19                                                         | 1.55      |
| 220944_at   | PGLYRP4 | peptidoglycan recognition<br>protein 4                                      | -<br>1.57 |
| 220963_s_at | C1orf89 | chromosome 1 open reading<br>frame 89                                       | -<br>1.37 |
| 220993_s_at | GPR63   | G protein-coupled receptor 63                                               | -1.2      |
| 221013_s_at | APOL2   | apolipoprotein L, 2                                                         | 1.46      |
| 221023_s_at | KCNH6   | potassium voltage-gated<br>channel, subfamily H (eag-<br>related), member 6 | -<br>1.59 |
| 221074_at   | NCR2    | natural cytotoxicity triggering<br>receptor 2                               | -<br>1.51 |
| 221077_at   | ARMC4   | armadillo repeat containing 4                                               | -<br>1.31 |

|             |          |                                      |           |
|-------------|----------|--------------------------------------|-----------|
| 221114_at   | AMBN     | ameloblastin (enamel matrix protein) | -<br>1.52 |
| 221137_at   |          | NA                                   | -<br>1.36 |
| 221190_s_at | C18orf8  | chromosome 18 open reading frame 8   | 1.87      |
| 221197_s_at | CHAT     | choline acetyltransferase            | -<br>1.44 |
| 221204_s_at | CRTAC1   | cartilage acidic protein 1           | -<br>1.28 |
| 221214_s_at | NELF     | nasal embryonic LHRH factor          | -1.6      |
| 221222_s_at | C1orf56  | chromosome 1 open reading frame 56   | 2.07      |
| 221229_s_at | FLJ20628 | hypothetical protein FLJ20628        | 1.91      |
| 221242_at   |          | NA                                   | -<br>1.72 |
| 221253_s_at | TXNDC5   | thioredoxin domain containing 5      | 1.72      |

|             |          |                                                         |      |
|-------------|----------|---------------------------------------------------------|------|
| 221255_s_at | TMEM93   | transmembrane protein 93                                | 1.53 |
|             |          |                                                         | -    |
| 221261_x_at | MAGED4B  | melanoma antigen family D, 4B                           | 1.47 |
|             |          |                                                         |      |
| 221267_s_at | FAM108A1 | family with sequence similarity<br>108, member A1       | 1.89 |
|             |          |                                                         |      |
| 221269_s_at | SH3BGRL3 | SH3 domain binding glutamic<br>acid-rich protein like 3 | 2.15 |
|             |          |                                                         |      |
| 221291_at   | ULBP2    | UL16 binding protein 2                                  | -1.3 |
|             |          |                                                         |      |
| 221292_at   | PTCH2    | patched homolog 2 (Drosophila)                          | -1.2 |
|             |          |                                                         |      |
| 221299_at   | GPR173   | G protein-coupled receptor 173                          | -    |
|             |          |                                                         | 1.37 |
|             |          |                                                         |      |
| 221300_at   | C15orf2  | chromosome 15 open reading<br>frame 2                   | -    |
|             |          |                                                         | 1.58 |
|             |          |                                                         |      |
| 221315_s_at | FGF22    | fibroblast growth factor 22                             | -    |
|             |          |                                                         | 1.39 |
|             |          |                                                         |      |
| 221350_at   | HOXC8    | homeobox C8                                             | -    |
|             |          |                                                         | 1.45 |

|             |          |                                           |           |
|-------------|----------|-------------------------------------------|-----------|
| 221355_at   | CHRNA3   | cholinergic receptor, nicotinic,<br>gamma | -<br>1.48 |
| 221379_at   |          | NA                                        | -<br>1.41 |
| 221387_at   | NPF1R1   | neuropeptide FF receptor 1                | -<br>1.38 |
| 221392_at   | TAS2R4   | taste receptor, type 2, member 4          | -<br>1.16 |
| 221399_at   | EDA2R    | ectodysplasin A2 receptor                 | -<br>1.56 |
| 221407_at   | GJA9     | gap junction protein, alpha 9,<br>36kDa   | -<br>1.98 |
| 221410_x_at | PCDHB3   | protocadherin beta 3                      | -<br>1.46 |
| 221416_at   | PLA2G2F  | phospholipase A2, group IIF               | -<br>1.29 |
| 221423_s_at | YIPF5    | Yip1 domain family, member 5              | -<br>1.72 |
| 221432_s_at | SLC25A28 | solute carrier family 25, member<br>28    | -<br>1.67 |

|             |          |                                                              |           |
|-------------|----------|--------------------------------------------------------------|-----------|
| 221436_s_at | CDCA3    | cell division cycle associated 3                             | -<br>1.79 |
| 221460_at   | OR2C1    | olfactory receptor, family 2,<br>subfamily C, member 1       | -1.3      |
| 221462_x_at | KLK15    | kallikrein-related peptidase 15                              | -<br>1.28 |
| 221473_x_at | SERINC3  | serine incorporator 3                                        | 1.71      |
| 221492_s_at | ATG3     | ATG3 autophagy related 3<br>homolog ( <i>S. cerevisiae</i> ) | 2.01      |
| 221506_s_at | TNPO2    | transportin 2 (importin 3,<br>karyopherin beta 2b)           | 1.58      |
| 221512_at   | C1orf160 | chromosome 1 open reading<br>frame 160                       | 1.32      |



|             |                   |                                                                                  |           |
|-------------|-------------------|----------------------------------------------------------------------------------|-----------|
| 221567_at   | NOL3              | nucleolar protein 3 (apoptosis repressor with CARD domain)                       | 1.32      |
| 221593_s_at | RPL31             | ribosomal protein L31                                                            | 1.69      |
| 221596_s_at | DKFZP564O05<br>23 | hypothetical protein<br>DKFZp564O0523                                            | 1.52      |
| 221618_s_at | TAF9B             | TAF9B RNA polymerase II, TATA box binding protein (TBP)-associated factor, 31kDa | 1.39      |
| 221622_s_at | TMEM126B          | transmembrane protein 126B                                                       | 2.2       |
| 221632_s_at | WDR4              | WD repeat domain 4                                                               | -<br>1.42 |
| 221647_s_at | RIC8A             | resistance to inhibitors of cholinesterase 8 homolog A (C. elegans)              | 1.44      |
| 221654_s_at | USP3              | ubiquitin specific peptidase 3                                                   | 1.79      |

|             |          |                                                        |      |
|-------------|----------|--------------------------------------------------------|------|
| 221677_s_at | DONSON   | downstream neighbor of SON                             | 1.42 |
| 221691_x_at | NPM1     | nucleophosmin (nucleolar phosphoprotein B23, numatrin) | 1.66 |
| 221698_s_at | CLEC7A   | C-type lectin domain family 7, member A                | 2.14 |
| 221739_at   | C19orf10 | chromosome 19 open reading frame 10                    | 1.89 |
| 221741_s_at | YTHDF1   | YTH domain family, member 1                            | 1.64 |
| 221798_x_at | RPS2     | ribosomal protein S2                                   | 1.51 |

|             |          |                                                 |           |
|-------------|----------|-------------------------------------------------|-----------|
| 221808_at   | RAB9A    | RAB9A, member RAS<br>oncogene family            | 1.9       |
| 221812_at   | FBXO42   | F-box protein 42                                | -<br>1.45 |
| 221816_s_at | PHF11    | PHD finger protein 11                           | 1.84      |
| 221817_at   | DOLPP1   | dolichyl pyrophosphate<br>phosphatase 1         | -<br>1.48 |
| 221819_at   | RAB35    | RAB35, member RAS oncogene<br>family            | 1.33      |
| 221821_s_at | C12orf41 | chromosome 12 open reading<br>frame 41          | 1.74      |
| 221825_at   | ANGEL2   | angel homolog 2 (Drosophila)                    | 1.8       |
| 221826_at   | ANGEL2   | angel homolog 2 (Drosophila)                    | 1.41      |
| 221831_at   | LUZP1    | leucine zipper protein 1                        | -<br>1.29 |
| 221875_x_at | HLA-F    | major histocompatibility<br>complex, class I, F | 1.78      |

|             |           |                                                          |           |
|-------------|-----------|----------------------------------------------------------|-----------|
| 221907_at   | C14orf172 | chromosome 14 open reading<br>frame 172                  | -<br>1.49 |
| 221921_s_at | CADM3     | cell adhesion molecule 3                                 | -<br>1.48 |
| 221943_x_at | RPL38     | ribosomal protein L38                                    | 2.03      |
| 221948_s_at | KLHL22    | kelch-like 22 (Drosophila)                               | -<br>1.35 |
| 221952_x_at | TRMT5     | TRM5 tRNA methyltransferase<br>5 homolog (S. cerevisiae) | 1.52      |
| 221954_at   | C20orf111 | chromosome 20 open reading<br>frame 111                  | 1.46      |
| 221972_s_at | SDF4      | stromal cell derived factor 4                            | 1.74      |
| 222001_x_at | LOC728855 | hypothetical protein LOC728855                           | 1.33      |
| 222015_at   | CSNK1E    | casein kinase 1, epsilon                                 | -<br>1.55 |
| 222020_s_at | HNT       | neurotrimin                                              | -<br>1.53 |

|             |         |                                                      |           |
|-------------|---------|------------------------------------------------------|-----------|
| 222022_at   | DTX3    | deltex 3 homolog (Drosophila)                        | -<br>1.46 |
| 222049_s_at | RBP4    | retinol binding protein 4, plasma                    | 1.81      |
| 222050_at   | FXR2    | fragile X mental retardation,<br>autosomal homolog 2 | -<br>1.29 |
| 222060_at   | KRT8P12 | keratin 8 pseudogene 12                              | -<br>1.74 |
| 222093_s_at | ZNHIT4  | zinc finger, HIT type 4                              | -<br>1.37 |
| 222097_at   | MZF1    | myeloid zinc finger 1                                | -<br>1.34 |
| 222099_s_at | LSM14A  | LSM14A, SCD6 homolog A (S.<br>cerevisiae)            | 1.27      |
| 222124_at   | HIF3A   | hypoxia inducible factor 3, alpha<br>subunit         | -<br>2.05 |
| 222125_s_at | PH-4    | hypoxia-inducible factor prolyl<br>4-hydroxylase     | 1.39      |

|             |            |                                                                |           |
|-------------|------------|----------------------------------------------------------------|-----------|
| 222129_at   | FAM134A    | family with sequence similarity<br>134, member A               | 1.42      |
| 222143_s_at | MTMR14     | myotubularin related protein 14                                | 1.71      |
| 222148_s_at | RHOT1      | ras homolog gene family,<br>member T1                          | 1.49      |
| 222150_s_at | tcag7.1314 | hypothetical protein LOC54103                                  | 2.46      |
| 222184_at   |            | NA                                                             | -<br>1.54 |
| 222201_s_at | CASP8AP2   | CASP8 associated protein 2                                     | 1.55      |
| 222207_x_at | LOC389517  | Williams Beuren syndrome<br>chromosome region 19<br>pseudogene | -<br>1.88 |
| 222210_at   | CASKIN2    | CASK interacting protein 2                                     | -<br>1.55 |
| 222216_s_at | MRPL17     | mitochondrial ribosomal protein<br>L17                         | 1.68      |

|             |         |                                                                |           |
|-------------|---------|----------------------------------------------------------------|-----------|
|             |         |                                                                |           |
| 222233_s_at | DCLRE1C | DNA cross-link repair 1C (PSO2 homolog, <i>S. cerevisiae</i> ) | 1.63      |
| 222262_s_at | ETNK1   | ethanolamine kinase 1                                          | 1.51      |
| 222296_at   |         | NA                                                             | -<br>1.36 |
| 222297_x_at | RPL18   | ribosomal protein L18                                          | -<br>1.64 |
| 222334_at   |         | NA                                                             | -<br>1.23 |
| 222339_x_at | NFIX    | nuclear factor I/X (CCAAT-binding transcription factor)        | -<br>1.74 |
| 222377_at   | TBX10   | T-box 10                                                       | -<br>1.48 |
| 31637_s_at  | NR1D1   | nuclear receptor subfamily 1, group D, member 1                | -2        |
| 32062_at    | LRRC14  | leucine rich repeat containing 14                              | -<br>1.35 |

|            |        |                                                                                                          |      |
|------------|--------|----------------------------------------------------------------------------------------------------------|------|
| 32069_at   | N4BP1  | Nedd4 binding protein 1                                                                                  | 1.94 |
|            |        |                                                                                                          | -    |
| 33322_i_at | SFN    | stratifin                                                                                                | 2.16 |
| 33579_i_at | GALR3  | galanin receptor 3                                                                                       | -1.3 |
|            |        |                                                                                                          | -    |
| 33768_at   | DMWD   | dystrophia myotonica, WD<br>repeat containing                                                            | 1.57 |
|            |        |                                                                                                          | -    |
| 34063_at   | RECQL5 | RecQ protein-like 5                                                                                      | 1.52 |
|            |        |                                                                                                          | -    |
| 34868_at   | SMG5   | Smg-5 homolog, nonsense<br>mediated mRNA decay factor<br>(C. elegans)                                    | -1.6 |
|            |        |                                                                                                          | -    |
| 35179_at   | B3GAT3 | beta-1,3-glucuronyltransferase 3<br>(glucuronosyltransferase I)                                          | 1.71 |
|            |        |                                                                                                          | -    |
| 35846_at   | THRA   | thyroid hormone receptor, alpha<br>(erythroblastic leukemia viral (v-<br>erb-a) oncogene homolog, avian) | 1.26 |



|            |         |                                                                       |           |
|------------|---------|-----------------------------------------------------------------------|-----------|
| 36019_at   | STK19   | serine/threonine kinase 19                                            | -1.4      |
| 36129_at   | SGSM2   | small G protein signaling<br>modulator 2                              | -<br>1.64 |
| 36865_at   | ANGEL1  | angel homolog 1 (Drosophila)                                          | -<br>1.39 |
| 36907_at   | MVK     | mevalonate kinase (mevalonic<br>aciduria)                             | -<br>1.46 |
| 36936_at   | TSTA3   | tissue specific transplantation<br>antigen P35B                       | 1.37      |
| 36994_at   | ATP6V0C | ATPase, H <sup>+</sup> transporting,<br>lysosomal 16kDa, V0 subunit c | 1.47      |
| 37590_g_at | ZNF710  | zinc finger protein 710                                               | -<br>1.35 |
| 37872_at   | JRK     | jerky homolog (mouse)                                                 | -<br>1.47 |
| 37953_s_at | ACCN2   | amiloride-sensitive cation<br>channel 2, neuronal                     | -<br>1.18 |

|            |        |                                                   |           |
|------------|--------|---------------------------------------------------|-----------|
| 38241_at   | BTN3A3 | butyrophilin, subfamily 3,<br>member A3           | 2.09      |
| 38398_at   | MADD   | MAP-kinase activating death<br>domain             | -<br>1.35 |
| 38447_at   | ADRBK1 | adrenergic, beta, receptor kinase<br>1            | -<br>1.83 |
| 38707_r_at | E2F4   | E2F transcription factor 4,<br>p107/p130-binding  | -<br>1.78 |
| 38710_at   | OTUB1  | OTU domain, ubiquitin aldehyde<br>binding 1       | -<br>1.44 |
| 39582_at   | CYLD   | cylindromatosis (turban tumor<br>syndrome)        | 1.61      |
| 39650_s_at | PCNXL2 | pecanex-like 2 (Drosophila)                       | -<br>1.53 |
| 39854_r_at | PNPLA2 | patatin-like phospholipase<br>domain containing 2 | -<br>1.57 |
| 40149_at   | SH2B1  | SH2B adaptor protein 1                            | 1.25      |

|            |         |                                                 |      |
|------------|---------|-------------------------------------------------|------|
| 40189_at   | SET     | SET translocation (myeloid leukemia-associated) | 1.56 |
| 40489_at   | ATN1    | atrophin 1                                      | 1.32 |
| 40850_at   | FKBP8   | FK506 binding protein 8, 38kDa                  | 1.47 |
| 41047_at   | C9orf16 | chromosome 9 open reading frame 16              | 1.54 |
| 41657_at   | STK11   | serine/threonine kinase 11                      | 1.41 |
| 44040_at   | FBXO41  | F-box protein 41                                | 1.31 |
| 44563_at   | WDR79   | WD repeat domain 79                             | -1.3 |
| 47571_at   | ZNF236  | zinc finger protein 236                         | 2.25 |
| 48030_i_at | C5orf4  | chromosome 5 open reading frame 4               | 1.79 |

|            |           |                                                  |           |
|------------|-----------|--------------------------------------------------|-----------|
| 49329_at   | KLHL22    | kelch-like 22 (Drosophila)                       | -1.4      |
| 50314_i_at | C20orf27  | chromosome 20 open reading<br>frame 27           | -<br>1.42 |
| 51774_s_at | LOC222070 | hypothetical protein LOC222070                   | -<br>2.06 |
| 52078_at   | C1orf160  | chromosome 1 open reading<br>frame 160           | -<br>1.24 |
| 52285_f_at | CEP76     | centrosomal protein 76kDa                        | 1.38      |
| 53991_at   | DENND2A   | DENN/MADD domain<br>containing 2A                | -<br>1.21 |
| 54970_at   | ZMIZ2     | zinc finger, MIZ-type containing<br>2            | -<br>1.76 |
| 55065_at   | MARK4     | MAP/microtubule affinity-<br>regulating kinase 4 | 2.3       |
| 55081_at   | MICALL1   | MICAL-like 1                                     | 1.33      |
| 55093_at   | CSGlcA-T  | chondroitin sulfate<br>glucuronyltransferase     | 1.41      |

|          |           |                                                                     |           |
|----------|-----------|---------------------------------------------------------------------|-----------|
| 55692_at | ELMO2     | engulfment and cell motility 2                                      | 1.69      |
| 564_at   | GNA11     | guanine nucleotide binding protein (G protein), alpha 11 (Gq class) | 1.54      |
| 56821_at | FLJ10815  | amino acid transporter                                              | -<br>1.35 |
| 56829_at | NIBP      | NIK and IKK{beta} binding protein                                   | -1.4      |
| 58900_at | LOC222070 | hypothetical protein LOC222070                                      | -1.9      |
| 61874_at | C9orf7    | chromosome 9 open reading frame 7                                   | -<br>1.41 |
| 64432_at | C12orf47  | chromosome 12 open reading frame 47                                 | 1.31      |
| 64440_at | IL17RC    | interleukin 17 receptor C                                           | -<br>1.35 |
| 65521_at | UBE2D4    | ubiquitin-conjugating enzyme E2D 4 (putative)                       | -<br>1.39 |

|                                     |          |                                                           |           |
|-------------------------------------|----------|-----------------------------------------------------------|-----------|
| 74694_s_at                          | RABEP2   | rabaptin, RAB GTPase binding effector protein 2           | 1.56      |
| 76897_s_at                          | FKBP15   | FK506 binding protein 15, 133kDa                          | 1.16      |
| 77508_r_at                          | RABEP2   | rabaptin, RAB GTPase binding effector protein 2           | -<br>1.48 |
| 78047_s_at                          | MT1P3    | metallothionein 1 pseudogene 3                            | -<br>1.93 |
| 89948_at                            | C20orf67 | chromosome 20 open reading frame 67                       | -<br>1.25 |
| 91682_at                            | EXOSC4   | exosome component 4                                       | -1.4      |
| 91920_at                            | BCAN     | brevican                                                  | -<br>1.39 |
| AFFX-<br>HUMISGF3A/M97935_M<br>A_at | STAT1    | signal transducer and activator of transcription 1, 91kDa | 1.88      |

|                                     |       |                                                              |           |
|-------------------------------------|-------|--------------------------------------------------------------|-----------|
| AFFX-<br>HUMISGF3A/M97935_M<br>B_at | STAT1 | signal transducer and activator<br>of transcription 1, 91kDa | 2.69      |
| AFFX-M27830_3_at                    |       | NA                                                           | -<br>1.59 |
| AFFX-r2-Ec-bioC-3_at                |       | NA                                                           | 2.09      |

**Supplemental Table 4-** Genes with a significant interaction

| <b>Affy ID</b> | <b>Symbol</b> | <b>Gene Name</b>                        | <b>Estimate</b> |
|----------------|---------------|-----------------------------------------|-----------------|
| 1487_at        | ESRRA         | estrogen-related receptor alpha         | 0.86            |
| 1729_at        | TRADD         | TNFRSF1A-associated via death<br>domain | 0.49            |

|             |         |                                                                                  |       |
|-------------|---------|----------------------------------------------------------------------------------|-------|
| 179_at      | PMS2L11 | postmeiotic segregation increased 2-like 11                                      | 0.83  |
| 1861_at     | BAD     | BCL2-antagonist of cell death                                                    | 0.59  |
| 200015_s_at | 2-Sep   | septin 2                                                                         | -0.92 |
| 200045_at   | ABCF1   | ATP-binding cassette, sub-family F (GCN20), member 1                             | 0.78  |
| 200055_at   | TAF10   | TAF10 RNA polymerase II, TATA box binding protein (TBP)-associated factor, 30kDa | 0.85  |
| 200066_at   | IK      | IK cytokine, down-regulator of HLA II                                            | -0.74 |



|             |          |                                                     |       |
|-------------|----------|-----------------------------------------------------|-------|
|             |          |                                                     |       |
| 200068_s_at | CANX     | calnexin                                            | 0.55  |
| 200070_at   | C2orf24  | chromosome 2 open reading frame<br>24               | -0.81 |
| 200083_at   | USP22    | ubiquitin specific peptidase 22                     | 0.88  |
| 200087_s_at | TMED2    | transmembrane emp24 domain<br>trafficking protein 2 | 0.84  |
| 200599_s_at | HSP90B1  | heat shock protein 90kDa beta<br>(Grp94), member 1  | 0.78  |
| 200616_s_at | KIAA0152 | KIAA0152                                            | 1.75  |
| 200617_at   | KIAA0152 | KIAA0152                                            | 1.99  |
| 200632_s_at | NDRG1    | N-myc downstream regulated gene 1                   | -1.2  |

|             |       |                                                                                                     |       |
|-------------|-------|-----------------------------------------------------------------------------------------------------|-------|
| 200636_s_at | PTPRF | protein tyrosine phosphatase,<br>receptor type, F                                                   | 1.6   |
| 200637_s_at | PTPRF | protein tyrosine phosphatase,<br>receptor type, F                                                   | 1.81  |
| 200639_s_at | YWHAZ | tyrosine 3-<br>monooxygenase/tryptophan 5-<br>monooxygenase activation protein,<br>zeta polypeptide | -0.79 |
| 200649_at   | NUCB1 | nucleobindin 1                                                                                      | 1.35  |

|             |       |                                                                                                    |       |
|-------------|-------|----------------------------------------------------------------------------------------------------|-------|
| 200654_at   | P4HB  | procollagen-proline, 2-oxoglutarate<br>4-dioxygenase (proline 4-<br>hydroxylase), beta polypeptide | 0.93  |
| 200656_s_at | P4HB  | procollagen-proline, 2-oxoglutarate<br>4-dioxygenase (proline 4-<br>hydroxylase), beta polypeptide | 1.35  |
| 200692_s_at | HSPA9 | heat shock 70kDa protein 9<br>(mortalin)                                                           | 0.95  |
| 200696_s_at | GSN   | gelsolin (amyloidosis, Finnish type)                                                               | -1.93 |

|             |        |                                                                                 |       |
|-------------|--------|---------------------------------------------------------------------------------|-------|
| 200698_at   | KDEL2  | KDEL (Lys-Asp-Glu-Leu)<br>endoplasmic reticulum protein<br>retention receptor 2 | 1.3   |
| 200700_s_at | KDEL2  | KDEL (Lys-Asp-Glu-Leu)<br>endoplasmic reticulum protein<br>retention receptor 2 | 1.24  |
| 200762_at   | DPYSL2 | dihydropyrimidinase-like 2                                                      | -1.59 |
| 200771_at   | LAMC1  | laminin, gamma 1 (formerly<br>LAMB2)                                            | -1.15 |
| 200788_s_at | PEA15  | phosphoprotein enriched in<br>astrocytes 15                                     | -0.98 |

|             |           |                                                    |       |
|-------------|-----------|----------------------------------------------------|-------|
| 200791_s_at | IQGAP1    | IQ motif containing GTPase<br>activating protein 1 | -1.35 |
| 200795_at   | SPARCL1   | SPARC-like 1 (mast9, hevin)                        | -2.51 |
| 200810_s_at | CIRBP     | cold inducible RNA binding protein                 | -1.1  |
| 200824_at   | GSTP1     | glutathione S-transferase pi                       | -1.21 |
| 200825_s_at | HYOU1     | hypoxia up-regulated 1                             | 2.19  |
| 200856_x_at | C20orf191 | chromosome 20 open reading frame<br>191            | 1.08  |
| 200859_x_at | FLNA      | filamin A, alpha (actin binding<br>protein 280)    | -1.17 |
| 200861_at   | CNOT1     | CCR4-NOT transcription complex,<br>subunit 1       | 0.92  |

|             |       |                                                                          |       |
|-------------|-------|--------------------------------------------------------------------------|-------|
|             |       |                                                                          |       |
| 200889_s_at | SSR1  | signal sequence receptor, alpha<br>(translocon-associated protein alpha) | 1.58  |
| 200890_s_at | SSR1  | signal sequence receptor, alpha<br>(translocon-associated protein alpha) | 1.84  |
| 200891_s_at | SSR1  | signal sequence receptor, alpha<br>(translocon-associated protein alpha) | 1     |
| 200894_s_at | FKBP4 | FK506 binding protein 4, 59kDa                                           | 0.91  |
| 200897_s_at | PALLD | palladin, cytoskeletal associated<br>protein                             | -1.38 |

|             |        |                                                                           |       |
|-------------|--------|---------------------------------------------------------------------------|-------|
| 200907_s_at | PALLD  | palladin, cytoskeletal associated protein                                 | -1.21 |
| 200911_s_at | TACC1  | transforming, acidic coiled-coil containing protein 1                     | -1.12 |
| 200913_at   | PPM1G  | protein phosphatase 1G (formerly 2C), magnesium-dependent, gamma isoform  | 0.59  |
| 200922_at   | KDELR1 | KDEL (Lys-Asp-Glu-Leu) endoplasmic reticulum protein retention receptor 1 | 1.11  |
| 200935_at   | CALR   | calreticulin                                                              | 2.4   |

|             |        |                                                        |       |
|-------------|--------|--------------------------------------------------------|-------|
| 200944_s_at | HMGN1  | high-mobility group nucleosome binding domain 1        | -0.91 |
| 200946_x_at | GLUD1  | glutamate dehydrogenase 1                              | 1.3   |
| 200950_at   | ARPC1A | actin related protein 2/3 complex, subunit 1A, 41kDa   | 0.78  |
| 200959_at   | FUS    | fusion (involved in t(12;16) in malignant liposarcoma) | -1.03 |
| 200967_at   | PPIB   | peptidylprolyl isomerase B (cyclophilin B)             | 0.84  |
| 200970_s_at | SERP1  | stress-associated endoplasmic reticulum protein 1      | 0.99  |



|             |       |                                                      |       |
|-------------|-------|------------------------------------------------------|-------|
| 200971_s_at | SERP1 | stress-associated endoplasmic<br>reticulum protein 1 | 1.29  |
| 200991_s_at | SNX17 | sorting nexin 17                                     | 0.7   |
| 201000_at   | AARS  | alanyl-tRNA synthetase                               | 0.82  |
| 201008_s_at | TXNIP | thioredoxin interacting protein                      | -1.93 |
| 201009_s_at | TXNIP | thioredoxin interacting protein                      | -1.86 |
| 201010_s_at | TXNIP | thioredoxin interacting protein                      | -1.77 |
| 201012_at   | ANXA1 | annexin A1                                           | -2.52 |
| 201030_x_at | LDHB  | lactate dehydrogenase B                              | -2.53 |
| 201034_at   | ADD3  | adducin 3 (gamma)                                    | -1.46 |

|             |        |                                                                                        |       |
|-------------|--------|----------------------------------------------------------------------------------------|-------|
| 201069_at   | MMP2   | matrix metalloproteinase 2 (gelatinase A, 72kDa gelatinase, 72kDa type IV collagenase) | -1.87 |
| 201095_at   | DAP    | death-associated protein                                                               | 0.92  |
| 201096_s_at | ARF4   | ADP-ribosylation factor 4                                                              | 1.24  |
| 201105_at   | LGALS1 | lectin, galactoside-binding, soluble, 1 (galectin 1)                                   | -1.31 |
| 201110_s_at | THBS1  | thrombospondin 1                                                                       | -2.67 |
| 201131_s_at | CDH1   | cadherin 1, type 1, E-cadherin (epithelial)                                            | -1.07 |

|             |          |                                                                                        |       |
|-------------|----------|----------------------------------------------------------------------------------------|-------|
| 201137_s_at | HLA-DPB1 | major histocompatibility complex,<br>class II, DP beta 1                               | -2.38 |
| 201141_at   | GPNMB    | glycoprotein (transmembrane) nmb                                                       | -2.42 |
| 201150_s_at | TIMP3    | TIMP metalloproteinase inhibitor 3<br>(Sorsby fundus dystrophy,<br>pseudoinflammatory) | -1.68 |
| 201162_at   | IGFBP7   | insulin-like growth factor binding<br>protein 7                                        | -1.87 |
| 201163_s_at | IGFBP7   | insulin-like growth factor binding<br>protein 7                                        | -1.32 |

|             |        |                                                                        |       |
|-------------|--------|------------------------------------------------------------------------|-------|
| 201176_s_at | ARCN1  | archain 1                                                              | 0.84  |
| 201213_at   | PPP1R7 | protein phosphatase 1, regulatory<br>(inhibitor) subunit 7             | 0.47  |
| 201220_x_at | CTBP2  | C-terminal binding protein 2                                           | -1.06 |
| 201240_s_at | SPCS2  | signal peptidase complex subunit 2<br>homolog ( <i>S. cerevisiae</i> ) | 0.93  |
| 201252_at   | PSMC4  | proteasome (prosome, macropain)<br>26S subunit, ATPase, 4              | 0.7   |
| 201261_x_at | BGN    | biglycan                                                               | -1.66 |
| 201264_at   | COPE   | coatamer protein complex, subunit<br>epsilon                           | 0.9   |

|             |         |                                                                       |       |
|-------------|---------|-----------------------------------------------------------------------|-------|
| 201278_at   | DAB2    | disabled homolog 2, mitogen-responsive phosphoprotein<br>(Drosophila) | -1.59 |
| 201280_s_at | DAB2    | disabled homolog 2, mitogen-responsive phosphoprotein<br>(Drosophila) | -1.47 |
| 201289_at   | CYR61   | cysteine-rich, angiogenic inducer, 61                                 | -2.34 |
| 201301_s_at | ANXA4   | annexin A4                                                            | -1.43 |
| 201302_at   | ANXA4   | annexin A4                                                            | -1.58 |
| 201312_s_at | SH3BGRL | SH3 domain binding glutamic acid-rich protein like                    | -1.29 |

|             |       |                                                          |      |
|-------------|-------|----------------------------------------------------------|------|
| 201324_at   | EMP1  | epithelial membrane protein 1                            | -3.2 |
| 201336_at   | VAMP3 | vesicle-associated membrane protein<br>3 (cellubrevin)   | -0.9 |
| 201350_at   | FLOT2 | flotillin 2                                              | 1.04 |
| 201391_at   | TRAP1 | TNF receptor-associated protein 1                        | 0.64 |
| 201399_s_at | TRAM1 | translocation associated membrane<br>protein 1           | 1.31 |
| 201400_at   | PSMB3 | proteasome (prosome, macropain)<br>subunit, beta type, 3 | 0.74 |

|             |        |                                                                         |       |
|-------------|--------|-------------------------------------------------------------------------|-------|
| 201404_x_at | PSMB2  | proteasome (prosome, macropain)<br>subunit, beta type, 2                | 0.73  |
| 201418_s_at | SOX4   | SRY (sex determining region Y)-box<br>4                                 | -0.92 |
| 201419_at   | BAP1   | BRCA1 associated protein-1<br>(ubiquitin carboxy-terminal<br>hydrolase) | 0.45  |
| 201421_s_at | WDR77  | WD repeat domain 77                                                     | 0.66  |
| 201426_s_at | VIM    | vimentin                                                                | -1.92 |
| 201433_s_at | PTDSS1 | phosphatidylserine synthase 1                                           | 0.61  |
| 201438_at   | COL6A3 | collagen, type VI, alpha 3                                              | -1.74 |

|             |         |                                                                          |       |
|-------------|---------|--------------------------------------------------------------------------|-------|
| 201496_x_at | MYH11   | myosin, heavy chain 11, smooth muscle                                    | -0.82 |
| 201505_at   | LAMB1   | laminin, beta 1                                                          | -2.03 |
| 201511_at   | AAMP    | angio-associated, migratory cell protein                                 | 0.56  |
| 201512_s_at | TOMM70A | translocase of outer mitochondrial membrane 70 homolog A (S. cerevisiae) | 1.02  |
| 201516_at   | SRM     | spermidine synthase                                                      | 0.98  |
| 201561_s_at | CLSTN1  | calsyntenin 1                                                            | -1.02 |
| 201567_s_at | GOLGA4  | golgi autoantigen, golgin subfamily a, 4                                 | 0.93  |
| 201582_at   | SEC23B  | Sec23 homolog B (S. cerevisiae)                                          | 1.79  |



|             |        |                                                       |       |
|-------------|--------|-------------------------------------------------------|-------|
| 201583_s_at | SEC23B | Sec23 homolog B ( <i>S. cerevisiae</i> )              | 1.22  |
| 201590_x_at | ANXA2  | annexin A2                                            | -1.25 |
| 201615_x_at | CALD1  | caldesmon 1                                           | -1.25 |
| 201622_at   | SND1   | staphylococcal nuclease and tudor domain containing 1 | 0.82  |
| 201657_at   | ARL1   | ADP-ribosylation factor-like 1                        | 1.33  |
| 201667_at   | GJA1   | gap junction protein, alpha 1, 43kDa                  | -2.81 |
| 201681_s_at | DLG5   | discs, large homolog 5 ( <i>Drosophila</i> )          | -0.65 |
| 201688_s_at | TPD52  | tumor protein D52                                     | 1.52  |
| 201689_s_at | TPD52  | tumor protein D52                                     | 1.94  |

|             |          |                                                                                                               |       |
|-------------|----------|---------------------------------------------------------------------------------------------------------------|-------|
| 201714_at   | TUBG1    | tubulin, gamma 1                                                                                              | 1.34  |
| 201719_s_at | EPB41L2  | erythrocyte membrane protein band<br>4.1-like 2                                                               | -1.2  |
| 201728_s_at | KIAA0100 | KIAA0100                                                                                                      | 1.1   |
| 201729_s_at | KIAA0100 | KIAA0100                                                                                                      | 1.86  |
| 201744_s_at | LUM      | lumican                                                                                                       | -4.04 |
| 201752_s_at | ADD3     | adducin 3 (gamma)                                                                                             | -0.91 |
| 201753_s_at | ADD3     | adducin 3 (gamma)                                                                                             | -1.23 |
| 201760_s_at | WSB2     | WD repeat and SOCS box-containing<br>2                                                                        | 1.31  |
| 201761_at   | MTHFD2   | methylenetetrahydrofolate<br>dehydrogenase (NADP+ dependent)<br>2, methenyltetrahydrofolate<br>cyclohydrolase | -2.68 |

|             |         |                                                                     |       |
|-------------|---------|---------------------------------------------------------------------|-------|
| 201792_at   | AEBP1   | AE binding protein 1                                                | -1.52 |
| 201799_s_at | OSBP    | oxysterol binding protein                                           | 1.09  |
| 201800_s_at | OSBP    | oxysterol binding protein                                           | 0.96  |
| 201810_s_at | SH3BP5  | SH3-domain binding protein 5<br>(BTK-associated)                    | -1.17 |
| 201811_x_at | SH3BP5  | SH3-domain binding protein 5<br>(BTK-associated)                    | -1.19 |
| 201817_at   | UBE3C   | ubiquitin protein ligase E3C                                        | 0.97  |
| 201821_s_at | TIMM17A | translocase of inner mitochondrial<br>membrane 17 homolog A (yeast) | 1.03  |

|             |         |                                                               |       |
|-------------|---------|---------------------------------------------------------------|-------|
| 201839_s_at | TACSTD1 | tumor-associated calcium signal<br>transducer 1               | -3.22 |
| 201842_s_at | EFEMP1  | EGF-containing fibulin-like<br>extracellular matrix protein 1 | -3.29 |
| 201843_s_at | EFEMP1  | EGF-containing fibulin-like<br>extracellular matrix protein 1 | -2.97 |
| 201851_at   | SH3GL1  | SH3-domain GRB2-like 1                                        | 0.56  |
| 201858_s_at | SRGN    | serglycin                                                     | -2.25 |
| 201859_at   | SRGN    | serglycin                                                     | -1.2  |
| 201860_s_at | PLAT    | plasminogen activator, tissue                                 | -1.91 |
| 201893_x_at | DCN     | decorin                                                       | -1.7  |
| 201894_s_at | DCN     | decorin                                                       | 1.27  |

|             |          |                                                                                              |       |
|-------------|----------|----------------------------------------------------------------------------------------------|-------|
| 201895_at   | ARAF     | v-raf murine sarcoma 3611 viral<br>oncogene homolog                                          | 0.77  |
| 201904_s_at | CTDSPL   | CTD (carboxy-terminal domain,<br>RNA polymerase II, polypeptide A)<br>small phosphatase-like | -1.09 |
| 201913_s_at | COASY    | Coenzyme A synthase                                                                          | 0.97  |
| 201915_at   | SEC63    | SEC63 homolog ( <i>S. cerevisiae</i> )                                                       | 1.07  |
| 201918_at   | SLC25A36 | solute carrier family 25, member 36                                                          | -1.49 |
| 201919_at   | SLC25A36 | solute carrier family 25, member 36                                                          | -1.02 |

|             |         |                                                                 |       |
|-------------|---------|-----------------------------------------------------------------|-------|
| 201923_at   | PRDX4   | peroxiredoxin 4                                                 | 1.03  |
| 201924_at   | AFF1    | AF4/FMR2 family, member 1                                       | -0.86 |
| 201964_at   | SETX    | senataxin                                                       | 1.03  |
| 201976_s_at | MYO10   | myosin X                                                        | -1.35 |
| 201998_at   | ST6GAL1 | ST6 beta-galactosamide alpha-2,6-sialyltransferase 1            | 1     |
| 202039_at   | TIAF1   | TGFB1-induced anti-apoptotic factor 1                           | 0.99  |
| 202041_s_at | FIBP    | fibroblast growth factor (acidic) intracellular binding protein | 0.89  |

|             |        |                                                            |       |
|-------------|--------|------------------------------------------------------------|-------|
| 202046_s_at | GRLF1  | glucocorticoid receptor DNA binding factor 1               | 0.82  |
| 202062_s_at | SEL1L  | sel-1 suppressor of lin-12-like (C. elegans)               | 1.6   |
| 202063_s_at | SEL1L  | sel-1 suppressor of lin-12-like (C. elegans)               | 0.74  |
| 202064_s_at | SEL1L  | sel-1 suppressor of lin-12-like (C. elegans)               | 1.52  |
| 202105_at   | IGBP1  | immunoglobulin (CD79A) binding protein 1                   | -0.77 |
| 202109_at   | ARFIP2 | ADP-ribosylation factor interacting protein 2 (arfaptin 2) | 1.22  |

|           |        |                                                                                                 |       |
|-----------|--------|-------------------------------------------------------------------------------------------------|-------|
| 202111_at | SLC4A2 | solute carrier family 4, anion exchanger, member 2 (erythrocyte membrane protein band 3-like 1) | 0.97  |
| 202112_at | VWF    | von Willebrand factor                                                                           | -1.85 |
| 202132_at | WWTR1  | WW domain containing transcription regulator 1                                                  | -1.07 |
| 202133_at | WWTR1  | WW domain containing transcription regulator 1                                                  | -1.53 |



|             |        |                                                                      |       |
|-------------|--------|----------------------------------------------------------------------|-------|
| 202135_s_at | ACTR1B | ARP1 actin-related protein 1<br>homolog B, centractin beta (yeast)   | 0.53  |
| 202149_at   | NEDD9  | neural precursor cell expressed,<br>developmentally down-regulated 9 | -2.13 |
| 202157_s_at | CUGBP2 | CUG triplet repeat, RNA binding<br>protein 2                         | -2.11 |
| 202177_at   | GAS6   | growth arrest-specific 6                                             | -0.86 |
| 202195_s_at | TMED5  | transmembrane emp24 protein<br>transport domain containing 5         | 1.31  |
| 202199_s_at | SRPK1  | SFRS protein kinase 1                                                | 0.64  |
| 202207_at   | ARL4C  | ADP-ribosylation factor-like 4C                                      | -1.97 |

|             |         |                                                              |       |
|-------------|---------|--------------------------------------------------------------|-------|
|             |         |                                                              |       |
| 202208_s_at | ARL4C   | ADP-ribosylation factor-like 4C                              | -1    |
| 202215_s_at | NFYC    | nuclear transcription factor Y,<br>gamma                     | 0.66  |
| 202258_s_at | PFAAP5  | phosphonoformate immuno-<br>associated protein 5             | -1.05 |
| 202273_at   | PDGFRB  | platelet-derived growth factor<br>receptor, beta polypeptide | -0.9  |
| 202286_s_at | TACSTD2 | tumor-associated calcium signal<br>transducer 2              | -3.25 |
| 202291_s_at | MGP     | matrix Gla protein                                           | -3.47 |
| 202295_s_at | CTSH    | cathepsin H                                                  | -1.31 |

|             |        |                                                                   |       |
|-------------|--------|-------------------------------------------------------------------|-------|
| 202296_s_at | RER1   | RER1 retention in endoplasmic reticulum 1 homolog (S. cerevisiae) | 1.01  |
| 202316_x_at | UBE4B  | ubiquitination factor E4B (UFD2 homolog, yeast)                   | 0.54  |
| 202332_at   | CSNK1E | casein kinase 1, epsilon                                          | -1.01 |
| 202336_s_at | PAM    | peptidylglycine alpha-amidating monooxygenase                     | -1.49 |
| 202341_s_at | TRIM2  | tripartite motif-containing 2                                     | -0.96 |
| 202348_s_at | TOR1A  | torsin family 1, member A (torsin A)                              | 0.61  |

|             |         |                                                                 |      |
|-------------|---------|-----------------------------------------------------------------|------|
| 202356_s_at | GTF2F1  | general transcription factor IIF,<br>polypeptide 1, 74kDa       | 0.52 |
| 202358_s_at | SNX19   | sorting nexin 19                                                | 0.87 |
| 202361_at   | SEC24C  | SEC24 related gene family, member<br>C ( <i>S. cerevisiae</i> ) | 0.64 |
| 202365_at   | UNC119B | unc-119 homolog B ( <i>C. elegans</i> )                         | 1.05 |
| 202369_s_at | TRAM2   | translocation associated membrane<br>protein 2                  | 1.24 |
| 202375_at   | SEC24D  | SEC24 related gene family, member<br>D ( <i>S. cerevisiae</i> ) | 2.13 |

|             |          |                                                                                           |       |
|-------------|----------|-------------------------------------------------------------------------------------------|-------|
| 202376_at   | SERPINA3 | serpin peptidase inhibitor, clade A<br>(alpha-1 antiproteinase, antitrypsin),<br>member 3 | 0.88  |
| 202388_at   | RGS2     | regulator of G-protein signaling 2,<br>24kDa                                              | -2.76 |
| 202389_s_at | HD       | huntingtin (Huntington disease)                                                           | 0.66  |
| 202403_s_at | COL1A2   | collagen, type I, alpha 2                                                                 | -2.1  |
| 202418_at   | YIF1A    | Yip1 interacting factor homolog A<br>( <i>S. cerevisiae</i> )                             | 1     |
| 202424_at   | MAP2K2   | mitogen-activated protein kinase<br>kinase 2                                              | 0.92  |
| 202426_s_at | RXRA     | retinoid X receptor, alpha                                                                | 1.29  |

|             |         |                                                             |       |
|-------------|---------|-------------------------------------------------------------|-------|
| 202433_at   | SLC35B1 | solute carrier family 35, member B1                         | 1.5   |
| 202449_s_at | RXRA    | retinoid X receptor, alpha                                  | 1.08  |
| 202464_s_at | PFKFB3  | 6-phosphofructo-2-kinase/fructose-2,6-biphosphatase 3       | -1.59 |
| 202472_at   | MPI     | mannose phosphate isomerase                                 | 0.58  |
| 202511_s_at | ATG5    | ATG5 autophagy related 5 homolog (S. cerevisiae)            | 0.89  |
| 202513_s_at | PPP2R5D | protein phosphatase 2, regulatory subunit B', delta isoform | 0.55  |

|             |       |                                                                                         |       |
|-------------|-------|-----------------------------------------------------------------------------------------|-------|
| 202541_at   | SCYE1 | small inducible cytokine subfamily<br>E, member 1 (endothelial monocyte-<br>activating) | 1.2   |
| 202551_s_at | CRIM1 | cysteine rich transmembrane BMP<br>regulator 1 (chordin-like)                           | -1.83 |
| 202552_s_at | CRIM1 | cysteine rich transmembrane BMP<br>regulator 1 (chordin-like)                           | -1.65 |
| 202558_s_at | STCH  | stress 70 protein chaperone,<br>microsome-associated, 60kDa                             | 1.69  |

|             |          |                                                           |      |
|-------------|----------|-----------------------------------------------------------|------|
| 202578_s_at | DDX19A   | DEAD (Asp-Glu-Ala-As) box polypeptide 19A                 | 1.04 |
| 202593_s_at | MIR16    | membrane interacting protein of RGS16                     | 1.26 |
| 202607_at   | NDST1    | N-deacetylase/N-sulfotransferase (heparan glucosaminyl) 1 | 0.85 |
| 202645_s_at | MEN1     | multiple endocrine neoplasia I                            | 0.94 |
| 202650_s_at | KIAA0195 | KIAA0195                                                  | 0.71 |
| 202655_at   | ARMET    | arginine-rich, mutated in early stage tumors              | 1.44 |
| 202664_at   | WIPF1    | WAS/WASL interacting protein family, member 1             | -1.4 |



|             |        |                                                                                                            |      |
|-------------|--------|------------------------------------------------------------------------------------------------------------|------|
| 202671_s_at | PDXK   | pyridoxal (pyridoxine, vitamin B6)<br>kinase                                                               | 0.95 |
| 202689_at   | RBM15B | RNA binding motif protein 15B                                                                              | 0.64 |
| 202707_at   | UMPS   | uridine monophosphate synthetase<br>(orotate phosphoribosyl transferase<br>and orotidine-5'-decarboxylase) | 0.41 |
| 202710_at   | BET1   | BET1 homolog ( <i>S. cerevisiae</i> )                                                                      | 1.13 |
| 202721_s_at | GFPT1  | glutamine-fructose-6-phosphate<br>transaminase 1                                                           | 1.37 |

|             |          |                                                                                      |      |
|-------------|----------|--------------------------------------------------------------------------------------|------|
| 202722_s_at | GFPT1    | glutamine-fructose-6-phosphate<br>transaminase 1                                     | 1.88 |
| 202752_x_at | SLC7A8   | solute carrier family 7 (cationic<br>amino acid transporter, y+ system),<br>member 8 | 0.74 |
| 202788_at   | MAPKAPK3 | mitogen-activated protein kinase-<br>activated protein kinase 3                      | 0.74 |
| 202801_at   | PRKACA   | protein kinase, cAMP-dependent,<br>catalytic, alpha                                  | 0.93 |
| 202819_s_at | TCEB3    | transcription elongation factor B<br>(SIII), polypeptide 3 (110kDa,<br>elongin A)    | 0.82 |

|             |        |                                                                  |       |
|-------------|--------|------------------------------------------------------------------|-------|
|             |        |                                                                  |       |
| 202822_at   | LPP    | LIM domain containing preferred translocation partner in lipoma  | -0.89 |
| 202831_at   | GPX2   | glutathione peroxidase 2 (gastrointestinal)                      | 1.5   |
| 202842_s_at | DNAJB9 | DnaJ (Hsp40) homolog, subfamily B, member 9                      | 1.15  |
| 202880_s_at | PSCD1  | pleckstrin homology, Sec7 and coiled-coil domains 1(cytohesin 1) | -0.69 |
| 202893_at   | UNC13B | unc-13 homolog B (C. elegans)                                    | 0.99  |
| 202910_s_at | CD97   | CD97 molecule                                                    | -1.32 |

|             |          |                                                                                     |       |
|-------------|----------|-------------------------------------------------------------------------------------|-------|
| 202913_at   | ARHGEF11 | Rho guanine nucleotide exchange factor (GEF) 11                                     | 0.65  |
| 202920_at   | ANK2     | ankyrin 2, neuronal                                                                 | -1.26 |
| 202935_s_at | SOX9     | SRY (sex determining region Y)-box 9 (campomelic dysplasia, autosomal sex-reversal) | -2.2  |
| 202936_s_at | SOX9     | SRY (sex determining region Y)-box 9 (campomelic dysplasia, autosomal sex-reversal) | -1.45 |
| 202947_s_at | GYPC     | glycophorin C (Gerbich blood group)                                                 | -0.82 |

|             |          |                                                                 |       |
|-------------|----------|-----------------------------------------------------------------|-------|
| 202949_s_at | FHL2     | four and a half LIM domains 2                                   | -1.78 |
| 202988_s_at | RGS1     | regulator of G-protein signaling 1                              | -3.3  |
| 202992_at   | C7       | complement component 7                                          | -2.37 |
| 202994_s_at | FBLN1    | fibulin 1                                                       | -1.78 |
| 203002_at   | AMOTL2   | angiomin like 2                                                 | -1.28 |
| 203029_s_at | PTPRN2   | protein tyrosine phosphatase,<br>receptor type, N polypeptide 2 | -0.86 |
| 203040_s_at | HMBS     | hydroxymethylbilane synthase                                    | 0.93  |
| 203046_s_at | TIMELESS | timeless homolog (Drosophila)                                   | 0.86  |

|             |              |                                                                                        |       |
|-------------|--------------|----------------------------------------------------------------------------------------|-------|
| 203066_at   | GALNAC4S-6ST | B cell RAG associated protein                                                          | -1.04 |
| 203071_at   | SEMA3B       | sema domain, immunoglobulin domain (Ig), short basic domain, secreted, (semaphorin) 3B | -0.84 |
| 203088_at   | FBLN5        | fibulin 5                                                                              | -2.43 |
| 203102_s_at | MGAT2        | mannosyl (alpha-1,6)-glycoprotein beta-1,2-N-acetylglucosaminyltransferase             | 1.16  |
| 203109_at   | UBE2M        | ubiquitin-conjugating enzyme E2M (UBC12 homolog, yeast)                                | 0.87  |
| 203117_s_at | USP52        | ubiquitin specific peptidase 52                                                        | 1     |

|             |         |                                                                                     |       |
|-------------|---------|-------------------------------------------------------------------------------------|-------|
| 203123_s_at | SLC11A2 | solute carrier family 11 (proton-coupled divalent metal ion transporters), member 2 | 1.15  |
| 203131_at   | PDGFRA  | platelet-derived growth factor receptor, alpha polypeptide                          | -2.43 |
| 203133_at   | SEC61B  | Sec61 beta subunit                                                                  | 0.89  |
| 203136_at   | RABAC1  | Rab acceptor 1 (prenylated)                                                         | 1.55  |
| 203154_s_at | PAK4    | p21(CDKN1A)-activated kinase 4                                                      | 0.67  |
| 203159_at   | GLS     | glutaminase                                                                         | -1.35 |

|             |         |                                                                   |       |
|-------------|---------|-------------------------------------------------------------------|-------|
| 203164_at   | SLC33A1 | solute carrier family 33 (acetyl-CoA transporter), member 1       | 1.73  |
| 203165_s_at | SLC33A1 | solute carrier family 33 (acetyl-CoA transporter), member 1       | 1.88  |
| 203196_at   | ABCC4   | ATP-binding cassette, sub-family C (CFTR/MRP), member 4           | -1.02 |
| 203200_s_at | MTRR    | 5-methyltetrahydrofolate-homocysteine methyltransferase reductase | 1.2   |



|             |         |                                                      |       |
|-------------|---------|------------------------------------------------------|-------|
| 203207_s_at | MTFR1   | mitochondrial fission regulator 1                    | 1.26  |
| 203208_s_at | MTFR1   | mitochondrial fission regulator 1                    | 1.12  |
| 203217_s_at | ST3GAL5 | ST3 beta-galactoside alpha-2,3-sialyltransferase 5   | 0.89  |
| 203244_at   | PEX5    | peroxisomal biogenesis factor 5                      | 0.75  |
| 203275_at   | IRF2    | interferon regulatory factor 2                       | 0.91  |
| 203279_at   | EDEM1   | ER degradation enhancer,<br>mannosidase alpha-like 1 | 1.1   |
| 203280_at   | SAFB2   | scaffold attachment factor B2                        | -1.01 |

|             |        |                                                  |       |
|-------------|--------|--------------------------------------------------|-------|
| 203285_s_at | HS2ST1 | heparan sulfate 2-O-sulfotransferase<br>1        | 0.95  |
| 203294_s_at | LMAN1  | lectin, mannose-binding, 1                       | 1.15  |
| 203297_s_at | JARID2 | jumonji, AT rich interactive domain<br>2         | -0.75 |
| 203315_at   | NCK2   | NCK adaptor protein 2                            | -1.45 |
| 203317_at   | PSD4   | pleckstrin and Sec7 domain<br>containing 4       | 0.61  |
| 203327_at   | IDE    | insulin-degrading enzyme                         | 0.98  |
| 203328_x_at | IDE    | insulin-degrading enzyme                         | 1.42  |
| 203331_s_at | INPP5D | inositol polyphosphate-5-<br>phosphatase, 145kDa | -0.73 |
| 203343_at   | UGDH   | UDP-glucose dehydrogenase                        | 1.36  |

|             |          |                                                                                           |       |
|-------------|----------|-------------------------------------------------------------------------------------------|-------|
| 203364_s_at | KIAA0652 | KIAA0652                                                                                  | 0.57  |
| 203383_s_at | GOLGA1   | golgi autoantigen, golgin subfamily<br>a, 1                                               | 0.68  |
| 203384_s_at | GOLGA1   | golgi autoantigen, golgin subfamily<br>a, 1                                               | 0.53  |
| 203392_s_at | CTBP1    | C-terminal binding protein 1                                                              | 1.25  |
| 203408_s_at | SATB1    | SATB homeobox 1                                                                           | -0.91 |
| 203445_s_at | CTDSP2   | CTD (carboxy-terminal domain,<br>RNA polymerase II, polypeptide A)<br>small phosphatase 2 | 0.72  |
| 203458_at   | SPR      | sepiapterin reductase (7,8-<br>dihydrobiopterin:NADP+<br>oxidoreductase)                  | 0.98  |

|             |        |                                                                                                          |      |
|-------------|--------|----------------------------------------------------------------------------------------------------------|------|
| 203462_x_at | EIF3B  | eukaryotic translation initiation factor<br>3, subunit B                                                 | 0.97 |
| 203484_at   | SEC61G | Sec61 gamma subunit                                                                                      | 0.94 |
| 203503_s_at | PEX14  | peroxisomal biogenesis factor 14                                                                         | 0.74 |
| 203536_s_at | CIAO1  | cytosolic iron-sulfur protein<br>assembly 1 homolog ( <i>S. cerevisiae</i> )                             | 0.68 |
| 203545_at   | ALG8   | asparagine-linked glycosylation 8<br>homolog ( <i>S. cerevisiae</i> , alpha-1,3-<br>glucosyltransferase) | 0.8  |

|             |        |                                                                                 |       |
|-------------|--------|---------------------------------------------------------------------------------|-------|
| 203560_at   | GGH    | gamma-glutamyl hydrolase<br>(conjugase, foylpolypolygammaglutamyl<br>hydrolase) | 1.85  |
| 203601_s_at | ZBTB17 | zinc finger and BTB domain<br>containing 17                                     | -1.24 |
| 203619_s_at | FAIM2  | Fas apoptotic inhibitory molecule 2                                             | 0.29  |
| 203632_s_at | GPRC5B | G protein-coupled receptor, family C,<br>group 5, member B                      | -1.1  |
| 203637_s_at | MID1   | midline 1 (Opitz/BBB syndrome)                                                  | -1.43 |

|             |       |                                                                                                                                                                                                             |      |
|-------------|-------|-------------------------------------------------------------------------------------------------------------------------------------------------------------------------------------------------------------|------|
| 203638_s_at | FGFR2 | fibroblast growth factor receptor 2<br>(bacteria-expressed kinase,<br>keratinocyte growth factor receptor,<br>craniofacial dysostosis 1, Crouzon<br>syndrome, Pfeiffer syndrome,<br>Jackson-Weiss syndrome) | -2.5 |
|-------------|-------|-------------------------------------------------------------------------------------------------------------------------------------------------------------------------------------------------------------|------|

|             |        |                                                                                                                                                                                                             |       |
|-------------|--------|-------------------------------------------------------------------------------------------------------------------------------------------------------------------------------------------------------------|-------|
| 203639_s_at | FGFR2  | fibroblast growth factor receptor 2<br>(bacteria-expressed kinase,<br>keratinocyte growth factor receptor,<br>craniofacial dysostosis 1, Crouzon<br>syndrome, Pfeiffer syndrome,<br>Jackson-Weiss syndrome) | -1.67 |
| 203644_s_at | MON1B  | MON1 homolog B (yeast)                                                                                                                                                                                      | 0.83  |
| 203664_s_at | POLR2D | polymerase (RNA) II (DNA directed)<br>polypeptide D                                                                                                                                                         | 0.63  |

|             |        |                                                                      |       |
|-------------|--------|----------------------------------------------------------------------|-------|
| 203666_at   | CXCL12 | chemokine (C-X-C motif) ligand 12<br>(stromal cell-derived factor 1) | -1.79 |
| 203675_at   | NUCB2  | nucleobindin 2                                                       | 1.83  |
| 203677_s_at | TARBP2 | TAR (HIV-1) RNA binding protein 2                                    | 0.54  |
| 203685_at   | BCL2   | B-cell CLL/lymphoma 2                                                | -1.22 |
| 203706_s_at | FZD7   | frizzled homolog 7 (Drosophila)                                      | -2.09 |
| 203709_at   | PHKG2  | phosphorylase kinase, gamma 2<br>(testis)                            | 0.69  |
| 203728_at   | BAK1   | BCL2-antagonist/killer 1                                             | 0.63  |
| 203733_at   | DEXI   | dexamethasone-induced transcript                                     | 1.04  |



|             |        |                                                             |       |
|-------------|--------|-------------------------------------------------------------|-------|
| 203747_at   | AQP3   | aquaporin 3 (Gill blood group)                              | 1.11  |
| 203748_x_at | RBMS1  | RNA binding motif, single stranded<br>interacting protein 1 | -1.2  |
| 203753_at   | TCF4   | transcription factor 4                                      | -1.65 |
| 203761_at   | SLA    | Src-like-adaptor                                            | -1.28 |
| 203771_s_at | BLVRA  | biliverdin reductase A                                      | -0.82 |
| 203773_x_at | BLVRA  | biliverdin reductase A                                      | -1.05 |
| 203824_at   | TSPAN8 | tetraspanin 8                                               | -1.91 |
| 203829_at   | ELP4   | elongation protein 4 homolog (S.<br>cerevisiae)             | 0.67  |
| 203886_s_at | FBLN2  | fibulin 2                                                   | -0.92 |

|             |         |                                                               |       |
|-------------|---------|---------------------------------------------------------------|-------|
| 203891_s_at | DAPK3   | death-associated protein kinase 3                             | -1.47 |
| 203911_at   | RAP1GAP | RAP1 GTPase activating protein                                | 1.17  |
| 203917_at   | CXADR   | coxsackie virus and adenovirus<br>receptor                    | -1.18 |
| 203920_at   | NR1H3   | nuclear receptor subfamily 1, group<br>H, member 3            | 1.05  |
| 203947_at   | CSTF3   | cleavage stimulation factor, 3' pre-<br>RNA, subunit 3, 77kDa | 0.69  |
| 203980_at   | FABP4   | fatty acid binding protein 4,<br>adipocyte                    | -2.49 |

|             |         |                                                                 |       |
|-------------|---------|-----------------------------------------------------------------|-------|
| 203989_x_at | F2R     | coagulation factor II (thrombin)<br>receptor                    | -1.53 |
| 203997_at   | PTPN3   | protein tyrosine phosphatase, non-<br>receptor type 3           | 1.28  |
| 204001_at   | SNAPC3  | small nuclear RNA activating<br>complex, polypeptide 3, 50kDa   | 0.57  |
| 204004_at   | PAWR    | PRKC, apoptosis, WT1, regulator                                 | -0.95 |
| 204019_s_at | SH3YL1  | SH3 domain containing, Ysc84-like 1<br>( <i>S. cerevisiae</i> ) | -2.57 |
| 204028_s_at | RABGAP1 | RAB GTPase activating protein 1                                 | -0.73 |

|             |        |                                                                                         |       |
|-------------|--------|-----------------------------------------------------------------------------------------|-------|
| 204037_at   | EDG2   | endothelial differentiation,<br>lysophosphatidic acid G-protein-<br>coupled receptor, 2 | -0.87 |
| 204058_at   | ME1    | malic enzyme 1, NADP(+)-<br>dependent, cytosolic                                        | 1.44  |
| 204066_s_at | CENTG2 | centaurin, gamma 2                                                                      | 0.65  |
| 204078_at   | SC65   | synaptonemal complex protein SC65                                                       | -0.6  |
| 204079_at   | TPST2  | tyrosylprotein sulfotransferase 2                                                       | 1.14  |
| 204083_s_at | TPM2   | tropomyosin 2 (beta)                                                                    | -1.69 |

|             |         |                                                                                                         |       |
|-------------|---------|---------------------------------------------------------------------------------------------------------|-------|
| 204099_at   | SMARCD3 | SWI/SNF related, matrix associated,<br>actin dependent regulator of<br>chromatin, subfamily d, member 3 | -0.5  |
| 204131_s_at | FOXO3   | forkhead box O3                                                                                         | -1.83 |
| 204135_at   | FILIP1L | filamin A interacting protein 1-like                                                                    | -1.98 |
| 204177_s_at | KLHL20  | kelch-like 20 (Drosophila)                                                                              | -0.72 |
| 204178_s_at | RBM14   | RNA binding motif protein 14                                                                            | 0.85  |
| 204186_s_at | PPID    | peptidylprolyl isomerase D<br>(cyclophilin D)                                                           | 1.14  |
| 204191_at   | IFNAR1  | interferon (alpha, beta and omega)                                                                      | 0.84  |

|             |          |                                                      |       |
|-------------|----------|------------------------------------------------------|-------|
|             |          | receptor 1                                           |       |
| 204207_s_at | RNGTT    | RNA guanylyltransferase and 5'-phosphatase           | 0.72  |
| 204218_at   | C11orf51 | chromosome 11 open reading frame 51                  | 0.59  |
| 204220_at   | GMFG     | glia maturation factor, gamma                        | -1.27 |
| 204225_at   | HDAC4    | histone deacetylase 4                                | 0.65  |
| 204259_at   | MMP7     | matrix metalloproteinase 7 (matrilysin, uterine)     | -2.24 |
| 204272_at   | LGALS4   | lectin, galactoside-binding, soluble, 4 (galectin 4) | -2.1  |

|             |         |                                                                                    |       |
|-------------|---------|------------------------------------------------------------------------------------|-------|
| 204288_s_at | SORBS2  | sorbin and SH3 domain containing 2                                                 | -0.83 |
| 204345_at   | COL16A1 | collagen, type XVI, alpha 1                                                        | -1.32 |
| 204363_at   | F3      | coagulation factor III<br>(thromboplastin, tissue factor)                          | -2.61 |
| 204370_at   | CLP1    | CLP1, cleavage and polyadenylation<br>factor I subunit, homolog (S.<br>cerevisiae) | 0.81  |
| 204408_at   | APEX2   | APEX nuclease<br>(apurinic/aprimidinic endonuclease)<br>2                          | 0.72  |

|             |        |                                                             |       |
|-------------|--------|-------------------------------------------------------------|-------|
| 204427_s_at | TMED2  | transmembrane emp24 domain<br>trafficking protein 2         | 1.33  |
| 204472_at   | GEM    | GTP binding protein overexpressed<br>in skeletal muscle     | -3.11 |
| 204474_at   | ZNF142 | zinc finger protein 142                                     | 0.7   |
| 204476_s_at | PC     | pyruvate carboxylase                                        | 1.66  |
| 204514_at   | DPH2   | DPH2 homolog ( <i>S. cerevisiae</i> )                       | 0.52  |
| 204528_s_at | NAP1L1 | nucleosome assembly protein 1-like<br>1                     | -1.05 |
| 204570_at   | COX7A1 | cytochrome c oxidase subunit VIIa<br>polypeptide 1 (muscle) | -1.22 |



|             |          |                                                               |       |
|-------------|----------|---------------------------------------------------------------|-------|
| 204594_s_at | SMCR7L   | Smith-Magenis syndrome<br>chromosome region, candidate 7-like | 1.19  |
| 204620_s_at | VCAN     | versican                                                      | -2.08 |
| 204623_at   | TFF3     | trefoil factor 3 (intestinal)                                 | -0.6  |
| 204624_at   | ATP7B    | ATPase, Cu <sup>++</sup> transporting, beta<br>polypeptide    | 1.2   |
| 204632_at   | RPS6KA4  | ribosomal protein S6 kinase, 90kDa,<br>polypeptide 4          | 0.81  |
| 204667_at   | FOXA1    | forkhead box A1                                               | 0.98  |
| 204670_x_at | HLA-DRB5 | major histocompatibility complex,<br>class II, DR beta 5      | -1.99 |

|             |         |                                                    |       |
|-------------|---------|----------------------------------------------------|-------|
| 204681_s_at | RAPGEF5 | Rap guanine nucleotide exchange factor (GEF) 5     | -1.92 |
| 204737_s_at | MYH7    | myosin, heavy chain 7, cardiac muscle, beta        | -1.12 |
| 204803_s_at | RRAD    | Ras-related associated with diabetes               | -1.28 |
| 204812_at   | ZW10    | ZW10, kinetochore associated, homolog (Drosophila) | 0.94  |
| 204816_s_at | DHX34   | DEAH (Asp-Glu-Ala-His) box polypeptide 34          | -0.56 |
| 204828_at   | RAD9A   | RAD9 homolog A (S. pombe)                          | 0.44  |
| 204841_s_at | EEA1    | early endosome antigen 1                           | 0.29  |

|             |       |                                                           |       |
|-------------|-------|-----------------------------------------------------------|-------|
| 204867_at   | GCHFR | GTP cyclohydrolase I feedback regulator                   | 1.08  |
| 204925_at   | CTNS  | cystinosis, nephropathic                                  | 0.91  |
| 204982_at   | GIT2  | G protein-coupled receptor kinase interactor 2            | -0.55 |
| 204983_s_at | GPC4  | glypican 4                                                | -0.52 |
| 205037_at   | RABL4 | RAB, member of RAS oncogene family-like 4                 | 0.92  |
| 205040_at   | ORM1  | orosomuroid 1                                             | 0.78  |
| 205041_s_at | ORM1  | orosomuroid 1                                             | 0.73  |
| 205115_s_at | RBM19 | RNA binding motif protein 19                              | 0.6   |
| 205116_at   | LAMA2 | laminin, alpha 2 (merosin, congenital muscular dystrophy) | -1.89 |

|             |         |                                                                           |       |
|-------------|---------|---------------------------------------------------------------------------|-------|
| 205130_at   | RAGE    | renal tumor antigen                                                       | -0.82 |
| 205131_x_at | CLEC11A | C-type lectin domain family 11,<br>member A                               | -0.63 |
| 205219_s_at | GALK2   | galactokinase 2                                                           | 1.03  |
| 205234_at   | SLC16A4 | solute carrier family 16, member 4<br>(monocarboxylic acid transporter 5) | -1.07 |
| 205258_at   | INHBB   | inhibin, beta B                                                           | -1.53 |
| 205273_s_at | PITRM1  | pitrilysin metallopeptidase 1                                             | 1.11  |
| 205308_at   | C8orf70 | chromosome 8 open reading frame<br>70                                     | -0.66 |
| 205328_at   | CLDN10  | claudin 10                                                                | -2.24 |

|             |        |                                                                                    |       |
|-------------|--------|------------------------------------------------------------------------------------|-------|
|             |        |                                                                                    |       |
| 205345_at   | BARD1  | BRCA1 associated RING domain 1                                                     | -1.04 |
| 205376_at   | INPP4B | inositol polyphosphate-4-phosphatase, type II, 105kDa                              | -0.56 |
| 205419_at   | EBI2   | Epstein-Barr virus induced gene 2 (lymphocyte-specific G protein-coupled receptor) | -2.11 |
| 205422_s_at | ITGBL1 | integrin, beta-like 1 (with EGF-like repeat domains)                               | -2.77 |
| 205426_s_at | HIP1   | huntingtin interacting protein 1                                                   | 0.57  |
| 205442_at   | MFAP3L | microfibrillar-associated protein 3-like                                           | 1.9   |

|             |         |                                                             |       |
|-------------|---------|-------------------------------------------------------------|-------|
| 205478_at   | PPP1R1A | protein phosphatase 1, regulatory<br>(inhibitor) subunit 1A | 1.76  |
| 205486_at   | TESK2   | testis-specific kinase 2                                    | 0.56  |
| 205517_at   | GATA4   | GATA binding protein 4                                      | 0.9   |
| 205536_at   | VAV2    | vav 2 guanine nucleotide exchange<br>factor                 | 0.76  |
| 205541_s_at | GSPT2   | G1 to S phase transition 2                                  | 1.07  |
| 205547_s_at | TAGLN   | transgelin                                                  | -2.23 |
| 205639_at   | AOAH    | acyloxyacyl hydrolase (neutrophil)                          | -0.79 |
| 205650_s_at | FGA     | fibrinogen alpha chain                                      | 0.48  |

|             |        |                                                  |       |
|-------------|--------|--------------------------------------------------|-------|
| 205674_x_at | FXYD2  | FXYD domain containing ion transport regulator 2 | -2.62 |
| 205677_s_at | DLEU1  | deleted in lymphocytic leukemia, 1               | 1.21  |
| 205696_s_at | GFRA1  | GDNF family receptor alpha 1                     | 0.43  |
| 205702_at   | PHTF1  | putative homeodomain transcription factor 1      | 0.53  |
| 205763_s_at | DDX18  | DEAD (Asp-Glu-Ala-Asp) box polypeptide 18        | 0.76  |
| 205775_at   | FAM50B | family with sequence similarity 50, member B     | 0.86  |

|             |        |                                                                              |       |
|-------------|--------|------------------------------------------------------------------------------|-------|
| 205777_at   | DUSP9  | dual specificity phosphatase 9                                               | -0.77 |
| 205798_at   | IL7R   | interleukin 7 receptor                                                       | -3.29 |
| 205821_at   | KLRK1  | killer cell lectin-like receptor<br>subfamily K, member 1                    | -0.95 |
| 205882_x_at | ADD3   | adducin 3 (gamma)                                                            | -0.99 |
| 205890_s_at | UBD    | ubiquitin D                                                                  | -2.91 |
| 205897_at   | NFATC4 | nuclear factor of activated T-cells,<br>cytoplasmic, calcineurin-dependent 4 | 0.74  |
| 205909_at   | POLE2  | polymerase (DNA directed), epsilon<br>2 (p59 subunit)                        | 0.74  |



|             |          |                                                 |       |
|-------------|----------|-------------------------------------------------|-------|
| 205934_at   | PLCL1    | phospholipase C-like 1                          | -0.3  |
| 205938_at   | PPM1E    | protein phosphatase 1E (PP2C domain containing) | 0.42  |
| 205955_at   |          | NA                                              | 0.29  |
| 206005_s_at | KIAA1009 | KIAA1009                                        | -0.61 |
| 206007_at   | PRG4     | proteoglycan 4                                  | 2.08  |
| 206015_s_at | FOXJ3    | forkhead box J3                                 | -0.87 |
| 206070_s_at | EPHA3    | EPH receptor A3                                 | -3.18 |
| 206080_at   | PLCH2    | phospholipase C, eta 2                          | -0.78 |
| 206093_x_at | TNXB     | tenascin XB                                     | -1.03 |
| 206116_s_at | TPM1     | tropomyosin 1 (alpha)                           | -1.63 |
| 206129_s_at | ARSB     | arylsulfatase B                                 | 0.31  |

|             |         |                                                           |       |
|-------------|---------|-----------------------------------------------------------|-------|
| 206141_at   | MOCS3   | molybdenum cofactor synthesis 3                           | 0.4   |
| 206153_at   | CYP4F11 | cytochrome P450, family 4,<br>subfamily F, polypeptide 11 | 1.44  |
| 206180_x_at | ZNF747  | zinc finger protein 747                                   | 0.75  |
| 206192_at   | CDSN    | corneodesmosin                                            | 0.75  |
| 206221_at   | RASA3   | RAS p21 protein activator 3                               | -0.51 |
| 206225_at   | ZNF507  | zinc finger protein 507                                   | 0.73  |
| 206256_at   | CPN1    | carboxypeptidase N, polypeptide 1                         | 1.74  |
| 206332_s_at | IFI16   | interferon, gamma-inducible protein<br>16                 | -2    |

|             |          |                                                                         |       |
|-------------|----------|-------------------------------------------------------------------------|-------|
| 206336_at   | CXCL6    | chemokine (C-X-C motif) ligand 6<br>(granulocyte chemotactic protein 2) | -2.98 |
| 206385_s_at | ANK3     | ankyrin 3, node of Ranvier (ankyrin<br>G)                               | -2.77 |
| 206419_at   | RORC     | RAR-related orphan receptor C                                           | 0.9   |
| 206421_s_at | SERPINB7 | serpin peptidase inhibitor, clade B<br>(ovalbumin), member 7            | 0.56  |
| 206453_s_at | NDRG2    | NDRG family member 2                                                    | -0.95 |
| 206468_s_at | KIAA0859 | KIAA0859                                                                | 0.88  |
| 206510_at   | SIX2     | SIX homeobox 2                                                          | 0.43  |

|             |         |                                                            |       |
|-------------|---------|------------------------------------------------------------|-------|
| 206570_s_at | PSG11   | pregnancy specific beta-1-glycoprotein 11                  | 0.36  |
| 206580_s_at | EFEMP2  | EGF-containing fibulin-like extracellular matrix protein 2 | -0.66 |
| 206590_x_at | DRD2    | dopamine receptor D2                                       | 0.49  |
| 206592_s_at | AP3D1   | adaptor-related protein complex 3, delta 1 subunit         | 0.99  |
| 206666_at   | GZMK    | granzyme K (granzyme 3; tryptase II)                       | -1.56 |
| 206682_at   | CLEC10A | C-type lectin domain family 10, member A                   | -0.95 |

|             |         |                                                                            |       |
|-------------|---------|----------------------------------------------------------------------------|-------|
| 206688_s_at | CPSF4   | cleavage and polyadenylation<br>specific factor 4, 30kDa                   | 0.56  |
| 206732_at   | SLITRK3 | SLIT and NTRK-like family,<br>member 3                                     | 1.03  |
| 206827_s_at | TRPV6   | transient receptor potential cation<br>channel, subfamily V, member 6      | -0.76 |
| 206893_at   | SALL1   | sal-like 1 (Drosophila)                                                    | 1.65  |
| 206946_at   | HCN4    | hyperpolarization activated cyclic<br>nucleotide-gated potassium channel 4 | 0.37  |

|             |         |                                                       |       |
|-------------|---------|-------------------------------------------------------|-------|
| 206963_s_at | NAT8B   | N-acetyltransferase 8B<br>(gene/pseudogene)           | -2.47 |
| 206974_at   | CXCR6   | chemokine (C-X-C motif) receptor 6                    | -0.87 |
| 207051_at   | SLC17A4 | solute carrier family 17 (sodium phosphate), member 4 | -1.25 |
| 207097_s_at | SLC17A2 | solute carrier family 17 (sodium phosphate), member 2 | 2.22  |
| 207129_at   | CA5B    | carbonic anhydrase VB,<br>mitochondrial               | 0.89  |
| 207220_at   | ART4    | ADP-ribosyltransferase 4 (Dombrock blood group)       | -1.28 |

|             |          |                                                                     |       |
|-------------|----------|---------------------------------------------------------------------|-------|
|             |          |                                                                     |       |
| 207233_s_at | MITF     | microphthalmia-associated<br>transcription factor                   | -1.24 |
| 207309_at   | NOS1     | nitric oxide synthase 1 (neuronal)                                  | 0.45  |
| 207339_s_at | LTB      | lymphotoxin beta (TNF superfamily,<br>member 3)                     | -0.69 |
| 207408_at   | SLC22A14 | solute carrier family 22 (organic<br>cation transporter), member 14 | 0.82  |
| 207409_at   | LECT2    | leukocyte cell-derived chemotaxin 2                                 | -1.98 |

|             |         |                                                                             |       |
|-------------|---------|-----------------------------------------------------------------------------|-------|
| 207434_s_at | FXYD2   | FXYD domain containing ion transport regulator 2                            | -2.47 |
| 207468_s_at | SFRP5   | secreted frizzled-related protein 5                                         | -1.22 |
| 207519_at   | SLC6A4  | solute carrier family 6 (neurotransmitter transporter, serotonin), member 4 | 0.54  |
| 207542_s_at | AQP1    | aquaporin 1 (Colton blood group)                                            | -1.98 |
| 207601_at   | SULT1B1 | sulfotransferase family, cytosolic, 1B, member 1                            | 1.07  |
| 207651_at   | GPR171  | G protein-coupled receptor 171                                              | -1.97 |



|             |         |                                                   |       |
|-------------|---------|---------------------------------------------------|-------|
| 207668_x_at | PDIA6   | protein disulfide isomerase family A,<br>member 6 | 1.19  |
| 207687_at   | INHBC   | inhibin, beta C                                   | 1.08  |
| 207724_s_at | SPAST   | spastin                                           | 0.43  |
| 207770_x_at | CSH2    | chorionic somatomammotropin<br>hormone 2          | 0.5   |
| 207812_s_at | GORASP2 | golgi reassembly stacking protein 2,<br>55kDa     | 1.43  |
| 207871_s_at | ST7     | suppression of tumorigenicity 7                   | 1.23  |
| 207961_x_at | MYH11   | myosin, heavy chain 11, smooth<br>muscle          | -1.11 |
| 207977_s_at | DPT     | dermatopontin                                     | -2.14 |
| 208087_s_at | ZBP1    | Z-DNA binding protein 1                           | -0.62 |

|             |         |                                                        |       |
|-------------|---------|--------------------------------------------------------|-------|
| 208114_s_at | ISG20L2 | interferon stimulated exonuclease<br>gene 20kDa-like 2 | 0.75  |
| 208116_s_at | MAN1A1  | mannosidase, alpha, class 1A,<br>member 1              | 1.9   |
| 208210_at   | MAS1    | MAS1 oncogene                                          | 0.84  |
| 208221_s_at | SLIT1   | slit homolog 1 (Drosophila)                            | -0.63 |

|             |         |                                                                                                                                                                                                             |       |
|-------------|---------|-------------------------------------------------------------------------------------------------------------------------------------------------------------------------------------------------------------|-------|
| 208228_s_at | FGFR2   | fibroblast growth factor receptor 2<br>(bacteria-expressed kinase,<br>keratinocyte growth factor receptor,<br>craniofacial dysostosis 1, Crouzon<br>syndrome, Pfeiffer syndrome,<br>Jackson-Weiss syndrome) | -2.23 |
| 208247_at   | C3orf51 | chromosome 3 open reading frame<br>51                                                                                                                                                                       | -0.77 |
| 208250_s_at | DMBT1   | deleted in malignant brain tumors 1                                                                                                                                                                         | 0.67  |

|             |          |                                                                |       |
|-------------|----------|----------------------------------------------------------------|-------|
| 208260_at   | AVPR1B   | arginine vasopressin receptor 1B                               | 0.87  |
| 208306_x_at | HLA-DRB4 | major histocompatibility complex,<br>class II, DR beta 4       | -1.97 |
| 208337_s_at | NR5A2    | nuclear receptor subfamily 5, group<br>A, member 2             | 0.63  |
| 208343_s_at | NR5A2    | nuclear receptor subfamily 5, group<br>A, member 2             | 0.95  |
| 208395_s_at | URB1     | URB1 ribosome biogenesis 1<br>homolog ( <i>S. cerevisiae</i> ) | 0.37  |

|             |         |                                                       |       |
|-------------|---------|-------------------------------------------------------|-------|
| 208424_s_at | CIAPIN1 | cytokine induced apoptosis inhibitor<br>1             | 0.83  |
| 208447_s_at | PRPS1   | phosphoribosyl pyrophosphate<br>synthetase 1          | 0.9   |
| 208459_s_at | XPO7    | exportin 7                                            | 0.55  |
| 208463_at   | GABRA4  | gamma-aminobutyric acid (GABA)<br>A receptor, alpha 4 | 0.53  |
| 208465_at   | GRM2    | glutamate receptor, metabotropic 2                    | 0.48  |
| 208478_s_at | BAX     | BCL2-associated X protein                             | -0.72 |
| 208529_at   | BTF3L1  | basic transcription factor 3, like 1                  | -0.7  |
| 208582_s_at | DUX3    | double homeobox, 3                                    | -0.75 |

|             |          |                                                                                 |       |
|-------------|----------|---------------------------------------------------------------------------------|-------|
| 208598_s_at | HUWE1    | HECT, UBA and WWE domain containing 1                                           | 0.8   |
| 208608_s_at | SNTB1    | syntrophin, beta 1 (dystrophin-associated protein A1, 59kDa, basic component 1) | 1.16  |
| 208623_s_at | VIL2     | villin 2 (ezrin)                                                                | -1.35 |
| 208625_s_at | EIF4G1   | eukaryotic translation initiation factor 4 gamma, 1                             | 0.77  |
| 208638_at   | ATP6V1C2 | ATPase, H <sup>+</sup> transporting, lysosomal 42kDa, V1 subunit C2             | 1.17  |

|             |       |                                                   |       |
|-------------|-------|---------------------------------------------------|-------|
| 208639_x_at | PDIA6 | protein disulfide isomerase family A,<br>member 6 | 1.33  |
| 208644_at   | PARP1 | poly (ADP-ribose) polymerase<br>family, member 1  | 0.94  |
| 208649_s_at | VCP   | valosin-containing protein                        | 0.75  |
| 208656_s_at | CCNI  | cyclin I                                          | -0.81 |
| 208658_at   | PDIA4 | protein disulfide isomerase family A,<br>member 4 | 1.2   |
| 208659_at   | CLIC1 | chloride intracellular channel 1                  | -0.98 |
| 208664_s_at | TTC3  | tetratricopeptide repeat domain 3                 | 0.61  |
| 208683_at   | CAPN2 | calpain 2, (m/II) large subunit                   | -1.13 |
| 208748_s_at | FLOT1 | flotillin 1                                       | 0.59  |

|             |         |                                                                                          |       |
|-------------|---------|------------------------------------------------------------------------------------------|-------|
| 208751_at   | NAPA    | N-ethylmaleimide-sensitive factor<br>attachment protein, alpha                           | 1.2   |
| 208752_x_at | NAP1L1  | nucleosome assembly protein 1-like<br>1                                                  | -1.17 |
| 208754_s_at | NAP1L1  | nucleosome assembly protein 1-like<br>1                                                  | -1.26 |
| 208758_at   | ATIC    | 5-aminoimidazole-4-carboxamide<br>ribonucleotide formyltransferase/IMP<br>cyclohydrolase | 0.77  |
| 208763_s_at | TSC22D3 | TSC22 domain family, member 3                                                            | -2.22 |



|             |         |                                                       |       |
|-------------|---------|-------------------------------------------------------|-------|
| 208789_at   | PTRF    | polymerase I and transcript release factor            | -1.23 |
| 208797_s_at | GOLGA8A | golgi autoantigen, golgin subfamily a, 8A             | -1.03 |
| 208800_at   | SRP72   | signal recognition particle 72kDa                     | 1.44  |
| 208819_at   | RAB8A   | RAB8A, member RAS oncogene family                     | 0.79  |
| 208827_at   | PSMB6   | proteasome (prosome, macropain) subunit, beta type, 6 | 0.77  |
| 208828_at   | POLE3   | polymerase (DNA directed), epsilon 3 (p17 subunit)    | 1.18  |

|             |           |                                                                          |       |
|-------------|-----------|--------------------------------------------------------------------------|-------|
| 208836_at   | ATP1B3    | ATPase, Na <sup>+</sup> /K <sup>+</sup> transporting, beta 3 polypeptide | -2.1  |
| 208853_s_at | CANX      | calnexin                                                                 | 1.34  |
| 208868_s_at | GABARAPL1 | GABA(A) receptor-associated protein like 1                               | -1.41 |
| 208869_s_at | GABARAPL1 | GABA(A) receptor-associated protein like 1                               | -1.11 |
| 208875_s_at | PAK2      | p21 (CDKN1A)-activated kinase 2                                          | 1.09  |
| 208894_at   | HLA-DRA   | major histocompatibility complex, class II, DR alpha                     | -2.44 |
| 208910_s_at | C1QBP     | complement component 1, q subcomponent binding protein                   | 1.31  |

|             |          |                                                                                         |       |
|-------------|----------|-----------------------------------------------------------------------------------------|-------|
| 208918_s_at | NADK     | NAD kinase                                                                              | 1.35  |
| 208919_s_at | NADK     | NAD kinase                                                                              | 1.14  |
| 208949_s_at | LGALS3   | lectin, galactoside-binding, soluble, 3                                                 | -3.3  |
| 208960_s_at | KLF6     | Kruppel-like factor 6                                                                   | -1.96 |
| 208961_s_at | KLF6     | Kruppel-like factor 6                                                                   | -2.03 |
| 208965_s_at | PYHIN1   | pyrin and HIN domain family,<br>member 1                                                | -1.8  |
| 208966_x_at | IFI16    | interferon, gamma-inducible protein<br>16                                               | -1.85 |
| 209003_at   | SLC25A11 | solute carrier family 25<br>(mitochondrial carrier; oxoglutarate<br>carrier), member 11 | 1.22  |
| 209016_s_at | KRT7     | keratin 7                                                                               | -1.9  |

|             |          |                                                 |       |
|-------------|----------|-------------------------------------------------|-------|
|             |          |                                                 |       |
| 209017_s_at | LONP1    | lon peptidase 1, mitochondrial                  | 0.92  |
| 209018_s_at | PINK1    | PTEN induced putative kinase 1                  | 0.99  |
| 209021_x_at | KIAA0652 | KIAA0652                                        | 0.92  |
| 209036_s_at | MDH2     | malate dehydrogenase 2, NAD<br>(mitochondrial)  | 1.2   |
| 209047_at   | AQP1     | aquaporin 1 (Colton blood group)                | -3.11 |
| 209061_at   | NCOA3    | nuclear receptor coactivator 3                  | -0.74 |
| 209099_x_at | JAG1     | jagged 1 (Alagille syndrome)                    | -1.58 |
| 209100_at   | IFRD2    | interferon-related developmental<br>regulator 2 | 1.07  |

|             |        |                                                                      |       |
|-------------|--------|----------------------------------------------------------------------|-------|
| 209101_at   | CTGF   | connective tissue growth factor                                      | -3.67 |
| 209103_s_at | UFD1L  | ubiquitin fusion degradation 1 like<br>(yeast)                       | 0.76  |
| 209117_at   | WBP2   | WW domain binding protein 2                                          | 1.25  |
| 209118_s_at | TUBA1A | tubulin, alpha 1a                                                    | -1.57 |
| 209138_x_at | IGL@   | immunoglobulin lambda locus                                          | -3.04 |
| 209158_s_at | PSCD2  | pleckstrin homology, Sec7 and<br>coiled-coil domains 2 (cytohesin-2) | -0.84 |
| 209163_at   | CYB561 | cytochrome b-561                                                     | 0.88  |
| 209164_s_at | CYB561 | cytochrome b-561                                                     | 0.93  |

|             |          |                                                                         |       |
|-------------|----------|-------------------------------------------------------------------------|-------|
| 209183_s_at | C10orf10 | chromosome 10 open reading frame<br>10                                  | -2.24 |
| 209186_at   | ATP2A2   | ATPase, Ca <sup>++</sup> transporting, cardiac<br>muscle, slow twitch 2 | 1.46  |
| 209195_s_at | ADCY6    | adenylate cyclase 6                                                     | 0.61  |
| 209201_x_at | CXCR4    | chemokine (C-X-C motif) receptor 4                                      | -2.2  |
| 209219_at   | RDBP     | RD RNA binding protein                                                  | -0.69 |
| 209234_at   | KIF1B    | kinesin family member 1B                                                | 0.95  |
| 209256_s_at | KIAA0265 | KIAA0265 protein                                                        | 0.9   |
| 209279_s_at | NSDHL    | NAD(P) dependent steroid<br>dehydrogenase-like                          | 1.08  |

|             |          |                                                                        |       |
|-------------|----------|------------------------------------------------------------------------|-------|
| 209283_at   | CRYAB    | crystallin, alpha B                                                    | -2.72 |
| 209286_at   | CDC42EP3 | CDC42 effector protein (Rho GTPase binding) 3                          | -1.8  |
| 209289_at   | NFIB     | nuclear factor I/B                                                     | -1.08 |
| 209291_at   | ID4      | inhibitor of DNA binding 4, dominant negative helix-loop-helix protein | -2.97 |
| 209300_s_at | NECAP1   | NECAP endocytosis associated 1                                         | 0.79  |
| 209311_at   | BCL2L2   | BCL2-like 2                                                            | 0.73  |
| 209312_x_at | HLA-DRB1 | major histocompatibility complex, class II, DR beta 1                  | -2.24 |

|             |        |                                                                                |       |
|-------------|--------|--------------------------------------------------------------------------------|-------|
| 209334_s_at | PSMD9  | proteasome (prosome, macropain)<br>26S subunit, non-ATPase, 9                  | 0.4   |
| 209335_at   | DCN    | decorin                                                                        | -2.08 |
| 209345_s_at | PI4K2A | phosphatidylinositol 4-kinase type 2<br>alpha                                  | 0.96  |
| 209370_s_at | SH3BP2 | SH3-domain binding protein 2                                                   | 0.71  |
| 209391_at   | DPM2   | dolichyl-phosphate<br>mannosyltransferase polypeptide 2,<br>regulatory subunit | 0.78  |



|             |          |                                                                      |       |
|-------------|----------|----------------------------------------------------------------------|-------|
| 209392_at   | ENPP2    | ectonucleotide<br>pyrophosphatase/phosphodiesterase 2<br>(autotaxin) | -2.48 |
| 209432_s_at | CREB3    | cAMP responsive element binding<br>protein 3                         | 0.92  |
| 209442_x_at | ANK3     | ankyrin 3, node of Ranvier (ankyrin<br>G)                            | -1.55 |
| 209444_at   | RAP1GDS1 | RAP1, GTP-GDP dissociation<br>stimulator 1                           | 1.33  |

|             |        |                                                                                                               |      |
|-------------|--------|---------------------------------------------------------------------------------------------------------------|------|
| 209509_s_at | DPAGT1 | dolichyl-phosphate (UDP-N-acetylglucosamine) N-acetylglucosaminephosphotransferase 1 (GlcNAc-1-P transferase) | 1.53 |
| 209522_s_at | CRAT   | carnitine acetyltransferase                                                                                   | 1.37 |
| 209532_at   | PLAA   | phospholipase A2-activating protein                                                                           | 0.46 |
| 209533_s_at | PLAA   | phospholipase A2-activating protein                                                                           | 0.99 |
| 209585_s_at | MINPP1 | multiple inositol polyphosphate histidine phosphatase, 1                                                      | 1.13 |

|             |        |                                                                                    |       |
|-------------|--------|------------------------------------------------------------------------------------|-------|
| 209606_at   | PSCDBP | pleckstrin homology, Sec7 and<br>coiled-coil domains, binding protein              | -2.1  |
| 209610_s_at | SLC1A4 | solute carrier family 1<br>(glutamate/neutral amino acid<br>transporter), member 4 | 1.69  |
| 209611_s_at | SLC1A4 | solute carrier family 1<br>(glutamate/neutral amino acid<br>transporter), member 4 | 0.42  |
| 209619_at   | CD74   | CD74 molecule, major<br>histocompatibility complex, class II<br>invariant chain    | -2.07 |

|             |          |                                                                      |       |
|-------------|----------|----------------------------------------------------------------------|-------|
| 209621_s_at | PDLIM3   | PDZ and LIM domain 3                                                 | -1.38 |
| 209624_s_at | MCCC2    | methylcrotonoyl-Coenzyme A<br>carboxylase 2 (beta)                   | 0.96  |
| 209665_at   | CYB561D2 | cytochrome b-561 domain containing<br>2                              | 1.01  |
| 209681_at   | SLC19A2  | solute carrier family 19 (thiamine<br>transporter), member 2         | -1.85 |
| 209687_at   | CXCL12   | chemokine (C-X-C motif) ligand 12<br>(stromal cell-derived factor 1) | -1.6  |
| 209706_at   | NKX3-1   | NK3 homeobox 1                                                       | 0.55  |
| 209771_x_at | CD24     | CD24 molecule                                                        | -2.17 |

|             |         |                                                                            |       |
|-------------|---------|----------------------------------------------------------------------------|-------|
| 209785_s_at | PLA2G4C | phospholipase A2, group IVC<br>(cytosolic, calcium-independent)            | -0.96 |
| 209795_at   | CD69    | CD69 molecule                                                              | -2.65 |
| 209824_s_at | ARNTL   | aryl hydrocarbon receptor nuclear<br>translocator-like                     | 1.38  |
| 209852_x_at | PSME3   | proteasome (prosome, macropain)<br>activator subunit 3 (PA28 gamma;<br>Ki) | 0.91  |
| 209864_at   | FRAT2   | frequently rearranged in advanced T-<br>cell lymphomas 2                   | 0.6   |

|             |          |                                                                                                     |       |
|-------------|----------|-----------------------------------------------------------------------------------------------------|-------|
| 209875_s_at | SPP1     | secreted phosphoprotein 1<br>(osteopontin, bone sialoprotein I,<br>early T-lymphocyte activation 1) | -3.72 |
| 209910_at   | SLC25A16 | solute carrier family 25<br>(mitochondrial carrier; Graves<br>disease autoantigen), member 16       | 0.54  |
| 209937_at   | TM4SF4   | transmembrane 4 L six family<br>member 4                                                            | -1.05 |
| 209998_at   | PIGO     | phosphatidylinositol glycan anchor<br>biosynthesis, class O                                         | 0.66  |

|             |       |                                                      |       |
|-------------|-------|------------------------------------------------------|-------|
| 209999_x_at | SOCS1 | suppressor of cytokine signaling 1                   | 0.58  |
| 210002_at   | GATA6 | GATA binding protein 6                               | -1.44 |
| 210022_at   | PCGF1 | polycomb group ring finger 1                         | 0.6   |
| 210045_at   | IDH2  | isocitrate dehydrogenase 2 (NADP+),<br>mitochondrial | 1.65  |
| 210046_s_at | IDH2  | isocitrate dehydrogenase 2 (NADP+),<br>mitochondrial | 1.43  |
| 210072_at   | CCL19 | chemokine (C-C motif) ligand 19                      | -2.76 |
| 210075_at   | 2-Mar | membrane-associated ring finger<br>(C3HC4) 2         | 0.63  |

|             |        |                                                                                                                   |       |
|-------------|--------|-------------------------------------------------------------------------------------------------------------------|-------|
| 210082_at   | ABCA4  | ATP-binding cassette, sub-family A<br>(ABC1), member 4                                                            | 0.71  |
| 210114_at   | INVS   | inversin                                                                                                          | 0.74  |
| 210139_s_at | PMP22  | peripheral myelin protein 22                                                                                      | -1.38 |
| 210142_x_at | FLOT1  | flotillin 1                                                                                                       | 0.72  |
| 210275_s_at | ZFAND5 | zinc finger, AN1-type domain 5                                                                                    | -1.4  |
| 210287_s_at | FLT1   | fms-related tyrosine kinase 1<br>(vascular endothelial growth<br>factor/vascular permeability factor<br>receptor) | -0.51 |
| 210289_at   | NAT8   | N-acetyltransferase 8                                                                                             | -2.69 |
| 210293_s_at | SEC23B | Sec23 homolog B ( <i>S. cerevisiae</i> )                                                                          | 1.42  |



|             |         |                                                                         |       |
|-------------|---------|-------------------------------------------------------------------------|-------|
|             |         |                                                                         |       |
| 210307_s_at | KLHL25  | kelch-like 25 (Drosophila)                                              | 0.72  |
| 210343_s_at | SLC22A6 | solute carrier family 22 (organic anion transporter), member 6          | -1.07 |
| 210385_s_at | ARTS-1  | type 1 tumor necrosis factor receptor shedding aminopeptidase regulator | 1.11  |
| 210397_at   | DEFB1   | defensin, beta 1                                                        | -3.64 |
| 210427_x_at | ANXA2   | annexin A2                                                              | -1.23 |
| 210434_x_at | JTB     | jumping translocation breakpoint                                        | 0.63  |
| 210443_x_at | OGFR    | opioid growth factor receptor                                           | 0.81  |

|             |          |                                                                  |       |
|-------------|----------|------------------------------------------------------------------|-------|
| 210483_at   | MGC31957 | hypothetical protein MGC31957                                    | -1.56 |
| 210541_s_at | TRIM27   | tripartite motif-containing 27                                   | 0.95  |
| 210582_s_at | LIMK2    | LIM domain kinase 2                                              | 0.78  |
| 210592_s_at | SAT1     | spermidine/spermine N1-acetyltransferase 1                       | -1    |
| 210613_s_at | SYNGR1   | synaptogyrin 1                                                   | -0.63 |
| 210622_x_at | CDK10    | cyclin-dependent kinase (CDC2-like)<br>10                        | 1.03  |
| 210627_s_at | GCS1     | glucosidase I                                                    | 0.8   |
| 210632_s_at | SGCA     | sarcoglycan, alpha (50kDa<br>dystrophin-associated glycoprotein) | -0.96 |

|             |          |                                                                            |       |
|-------------|----------|----------------------------------------------------------------------------|-------|
| 210633_x_at | KRT10    | keratin 10 (epidermolytic hyperkeratosis; keratosis palmaris et plantaris) | 0.81  |
| 210639_s_at | ATG5     | ATG5 autophagy related 5 homolog (S. cerevisiae)                           | 0.94  |
| 210667_s_at | C21orf33 | chromosome 21 open reading frame 33                                        | 0.99  |
| 210683_at   | NRTN     | neurturin                                                                  | 1.2   |
| 210692_s_at | SLC43A3  | solute carrier family 43, member 3                                         | 1.66  |
| 210715_s_at | SPINT2   | serine peptidase inhibitor, Kunitz type, 2                                 | -2.08 |
| 210752_s_at | MLX      | MAX-like protein X                                                         | 0.37  |

|             |           |                                                                    |       |
|-------------|-----------|--------------------------------------------------------------------|-------|
| 210753_s_at | EPHB1     | EPH receptor B1                                                    | 0.65  |
| 210757_x_at | DAB2      | disabled homolog 2, mitogen-responsive phosphoprotein (Drosophila) | -1.19 |
| 210764_s_at | CYR61     | cysteine-rich, angiogenic inducer, 61                              | -2.64 |
| 210822_at   | LOC283345 | RPL13-2 pseudogene                                                 | 0.53  |
| 210835_s_at | CTBP2     | C-terminal binding protein 2                                       | -1.29 |
| 210839_s_at | ENPP2     | ectonucleotide pyrophosphatase/phosphodiesterase 2 (autotaxin)     | -1.71 |

|             |           |                                                                                                |       |
|-------------|-----------|------------------------------------------------------------------------------------------------|-------|
| 210868_s_at | ELOVL6    | ELOVL family member 6, elongation of long chain fatty acids (FEN1/Elo2, SUR4/Elo3-like, yeast) | 1.63  |
| 210879_s_at | RAB11FIP5 | RAB11 family interacting protein 5 (class I)                                                   | -0.56 |
| 210896_s_at | ASPH      | aspartate beta-hydroxylase                                                                     | 0.88  |
| 210904_s_at | IL13RA1   | interleukin 13 receptor, alpha 1                                                               | 1.57  |
| 210908_s_at | PFDN5     | prefoldin subunit 5                                                                            | -0.79 |
| 210915_x_at | TRBC1     | T cell receptor beta constant 1                                                                | -1.45 |

|             |         |                                                      |       |
|-------------|---------|------------------------------------------------------|-------|
| 210942_s_at | ST3GAL6 | ST3 beta-galactoside alpha-2,3-sialyltransferase 6   | 1.82  |
| 210951_x_at | RAB27A  | RAB27A, member RAS oncogene family                   | 1.27  |
| 210963_s_at | GYG2    | glycogenin 2                                         | 0.96  |
| 210964_s_at | GYG2    | glycogenin 2                                         | 1.48  |
| 210971_s_at | ARNTL   | aryl hydrocarbon receptor nuclear translocator-like  | 1.16  |
| 210975_x_at | FASTK   | Fas-activated serine/threonine kinase                | 0.65  |
| 210982_s_at | HLA-DRA | major histocompatibility complex, class II, DR alpha | -2.61 |
| 210986_s_at | TPM1    | tropomyosin 1 (alpha)                                | -1.43 |

|             |          |                                                                                                        |      |
|-------------|----------|--------------------------------------------------------------------------------------------------------|------|
| 210996_s_at | YWHAE    | tyrosine 3-<br>monooxygenase/tryptophan 5-<br>monooxygenase activation protein,<br>epsilon polypeptide | 0.83 |
| 211034_s_at | FLJ30092 | AF-1 specific protein phosphatase                                                                      | 0.61 |
| 211048_s_at | PDIA4    | protein disulfide isomerase family A,<br>member 4                                                      | 1.57 |
| 211061_s_at | MGAT2    | mannosyl (alpha-1,6)-glycoprotein<br>beta-1,2-N-<br>acetylglucosaminyltransferase                      | 1.11 |
| 211098_x_at | TMCO1    | transmembrane and coiled-coil<br>domains 1                                                             | 0.61 |

|             |        |                                                                                             |      |
|-------------|--------|---------------------------------------------------------------------------------------------|------|
|             |        |                                                                                             |      |
| 211136_s_at | CLPTM1 | cleft lip and palate associated<br>transmembrane protein 1                                  | 1.12 |
| 211139_s_at | NAB1   | NGFI-A binding protein 1 (EGR1<br>binding protein 1)                                        | 0.66 |
| 211150_s_at | DLAT   | dihydrolipoamide S-acetyltransferase<br>(E2 component of pyruvate<br>dehydrogenase complex) | 1.16 |



|             |        |                                                                                                                 |       |
|-------------|--------|-----------------------------------------------------------------------------------------------------------------|-------|
| 211155_s_at | THPO   | thrombopoietin (myeloproliferative leukemia virus oncogene ligand, megakaryocyte growth and development factor) | 1     |
| 211286_x_at | CSF2RA | colony stimulating factor 2 receptor, alpha, low-affinity (granulocyte-macrophage)                              | -0.68 |
| 211318_s_at | RAE1   | RAE1 RNA export 1 homolog (S. pombe)                                                                            | 0.49  |

|             |           |                                                                                   |       |
|-------------|-----------|-----------------------------------------------------------------------------------|-------|
| 211368_s_at | CASP1     | caspase 1, apoptosis-related cysteine peptidase (interleukin 1, beta, convertase) | -1.38 |
| 211430_s_at | IGHG3     | immunoglobulin heavy constant gamma 3 (G3m marker)                                | -3.24 |
| 211458_s_at | GABARAPL3 | GABA(A) receptors associated protein like 3                                       | -1.14 |
| 211489_at   | ADRA1A    | adrenergic, alpha-1A-, receptor                                                   | 1.84  |
| 211622_s_at | ARF3      | ADP-ribosylation factor 3                                                         | 0.82  |
| 211642_at   |           | NA                                                                                | -0.48 |
| 211645_x_at |           | NA                                                                                | -2.7  |
| 211651_s_at | LAMB1     | laminin, beta 1                                                                   | -1.38 |

|             |          |                                                                                    |       |
|-------------|----------|------------------------------------------------------------------------------------|-------|
| 211652_s_at | LBP      | lipopolysaccharide binding protein                                                 | 1.6   |
| 211656_x_at | HLA-DQB1 | major histocompatibility complex,<br>class II, DQ beta 1                           | -1.44 |
| 211709_s_at | CLEC11A  | C-type lectin domain family 11,<br>member A                                        | -1    |
| 211717_at   | ANKRD40  | ankyrin repeat domain 40                                                           | 0.58  |
| 211748_x_at | PTGDS    | prostaglandin D2 synthase 21kDa<br>(brain)                                         | -2.24 |
| 211774_s_at | MMACHC   | methylmalonic aciduria (cobalamin<br>deficiency) cblC type, with<br>homocystinuria | 1.24  |

|             |          |                                                                                                                 |       |
|-------------|----------|-----------------------------------------------------------------------------------------------------------------|-------|
| 211793_s_at | ABI2     | abl interactor 2                                                                                                | 0.82  |
| 211796_s_at | TRBC1    | T cell receptor beta constant 1                                                                                 | -1.59 |
| 211813_x_at | DCN      | decorin                                                                                                         | -2    |
| 211831_s_at | THPO     | thrombopoietin (myeloproliferative leukemia virus oncogene ligand, megakaryocyte growth and development factor) | 0.68  |
| 211855_s_at | SLC25A14 | solute carrier family 25 (mitochondrial carrier, brain), member 14                                              | 0.46  |
| 211896_s_at | DCN      | decorin                                                                                                         | -1.96 |

|             |        |                                                                                       |       |
|-------------|--------|---------------------------------------------------------------------------------------|-------|
| 211901_s_at | PDE4A  | phosphodiesterase 4A, cAMP-specific (phosphodiesterase E2 duncce homolog, Drosophila) | -0.89 |
| 211919_s_at | CXCR4  | chemokine (C-X-C motif) receptor 4                                                    | -2.34 |
| 211936_at   | HSPA5  | heat shock 70kDa protein 5 (glucose-regulated protein, 78kDa)                         | 1.22  |
| 211964_at   | COL4A2 | collagen, type IV, alpha 2                                                            | -2.05 |
| 211974_x_at | RBPJ   | recombination signal binding protein for immunoglobulin kappa J region                | -1.09 |

|             |          |                                                           |       |
|-------------|----------|-----------------------------------------------------------|-------|
| 211980_at   | COL4A1   | collagen, type IV, alpha 1                                | -2.14 |
| 211986_at   | AHNAK    | AHNAK nucleoprotein                                       | -1.39 |
| 211990_at   | HLA-DPA1 | major histocompatibility complex,<br>class II, DP alpha 1 | -2.53 |
| 211991_s_at | HLA-DPA1 | major histocompatibility complex,<br>class II, DP alpha 1 | -2.59 |
| 211996_s_at | LOC23117 | KIAA0220-like protein                                     | -1.62 |
| 212003_at   | C1orf144 | chromosome 1 open reading frame<br>144                    | 0.64  |
| 212006_at   | UBXD2    | UBX domain containing 2                                   | 0.98  |
| 212036_s_at | PNN      | pinin, desmosome associated protein                       | -1.34 |

|             |          |                                                                                                      |      |
|-------------|----------|------------------------------------------------------------------------------------------------------|------|
| 212041_at   | ATP6V0D1 | ATPase, H <sup>+</sup> transporting, lysosomal<br>38kDa, V0 subunit d1                               | 0.82 |
| 212048_s_at | YARS     | tyrosyl-tRNA synthetase                                                                              | 1.1  |
| 212052_s_at | TBC1D9B  | TBC1 domain family, member 9B<br>(with GRAM domain)                                                  | 0.9  |
| 212083_at   | TEX261   | testis expressed 261                                                                                 | 1.07 |
| 212090_at   | GRINA    | glutamate receptor, ionotropic, N-<br>methyl D-aspartate-associated protein<br>1 (glutamate binding) | 1.12 |

|           |          |                                                        |       |
|-----------|----------|--------------------------------------------------------|-------|
| 212110_at | SLC39A14 | solute carrier family 39 (zinc transporter), member 14 | 1.02  |
| 212145_at | MRPS27   | mitochondrial ribosomal protein S27                    | 0.93  |
| 212151_at | PBX1     | pre-B-cell leukemia homeobox 1                         | -1.04 |
| 212160_at | XPOT     | exportin, tRNA (nuclear export receptor for tRNAs)     | 1.72  |
| 212165_at | TMEM183A | transmembrane protein 183A                             | 0.69  |
| 212174_at | AK2      | adenylate kinase 2                                     | 0.89  |
| 212186_at | ACACA    | acetyl-Coenzyme A carboxylase alpha                    | 1.29  |



|             |         |                                                           |       |
|-------------|---------|-----------------------------------------------------------|-------|
| 212187_x_at | PTGDS   | prostaglandin D2 synthase 21kDa<br>(brain)                | -2.34 |
| 212188_at   | KCTD12  | potassium channel tetramerisation<br>domain containing 12 | -1.86 |
| 212192_at   | KCTD12  | potassium channel tetramerisation<br>domain containing 12 | -1.9  |
| 212202_s_at | TMEM87A | transmembrane protein 87A                                 | -1.21 |
| 212204_at   | TMEM87A | transmembrane protein 87A                                 | -0.94 |
| 212245_at   | MCFD2   | multiple coagulation factor<br>deficiency 2               | 1.57  |
| 212246_at   | MCFD2   | multiple coagulation factor<br>deficiency 2               | 1.32  |

|             |          |                                                                      |       |
|-------------|----------|----------------------------------------------------------------------|-------|
| 212248_at   | MTDH     | metadherin                                                           | 1.24  |
| 212250_at   | MTDH     | metadherin                                                           | 1.34  |
| 212276_at   | LPIN1    | lipin 1                                                              | 1.09  |
| 212300_at   | TXLNA    | taxilin alpha                                                        | 1.14  |
| 212314_at   | KIAA0746 | KIAA0746 protein                                                     | -1.33 |
| 212356_at   | KIAA0323 | KIAA0323                                                             | 1.05  |
| 212357_at   | KIAA0280 | KIAA0280                                                             | 0.75  |
| 212361_s_at | ATP2A2   | ATPase, Ca <sup>++</sup> transporting, cardiac muscle, slow twitch 2 | 1.61  |
| 212372_at   | MYH10    | myosin, heavy chain 10, non-muscle                                   | -0.9  |

|             |          |                                                                                                                                           |       |
|-------------|----------|-------------------------------------------------------------------------------------------------------------------------------------------|-------|
| 212379_at   | GART     | phosphoribosylglycinamide<br>formyltransferase,<br>phosphoribosylglycinamide<br>synthetase,<br>phosphoribosylaminoimidazole<br>synthetase | 0.89  |
| 212383_at   | ATP6V0A1 | ATPase, H <sup>+</sup> transporting, lysosomal<br>V0 subunit a1                                                                           | 0.75  |
| 212386_at   | TCF4     | transcription factor 4                                                                                                                    | -1.54 |
| 212387_at   | TCF4     | transcription factor 4                                                                                                                    | -1.63 |
| 212404_s_at | UBE3B    | ubiquitin protein ligase E3B                                                                                                              | 0.39  |
| 212405_s_at | KIAA0859 | KIAA0859                                                                                                                                  | 0.82  |

|             |          |                                                                                  |       |
|-------------|----------|----------------------------------------------------------------------------------|-------|
| 212419_at   | C10orf56 | chromosome 10 open reading frame<br>56                                           | 1.28  |
| 212423_at   | C10orf56 | chromosome 10 open reading frame<br>56                                           | 1.04  |
| 212434_at   | GRPEL1   | GrpE-like 1, mitochondrial (E. coli)                                             | 0.89  |
| 212439_at   | IHPK1    | inositol hexaphosphate kinase 1                                                  | 0.8   |
| 212472_at   | MICAL2   | microtubule associated<br>monooxygenase, calponin and LIM<br>domain containing 2 | 1.12  |
| 212496_s_at | JMJD2B   | jumonji domain containing 2B                                                     | 0.86  |
| 212509_s_at | MXRA7    | matrix-remodelling associated 7                                                  | -1.48 |

|             |           |                                                                              |       |
|-------------|-----------|------------------------------------------------------------------------------|-------|
| 212527_at   | D15Wsu75e | DNA segment, Chr 15, Wayne State University 75, expressed                    | 1.5   |
| 212528_at   |           | NA                                                                           | 1.08  |
| 212532_s_at | LSM12     | LSM12 homolog ( <i>S. cerevisiae</i> )                                       | 0.92  |
| 212541_at   | FLAD1     | FAD1 flavin adenine dinucleotide synthetase homolog ( <i>S. cerevisiae</i> ) | 0.75  |
| 212542_s_at | PHIP      | pleckstrin homology domain interacting protein                               | -1.1  |
| 212543_at   | AIM1      | absent in melanoma 1                                                         | -1.57 |

|             |        |                                                                                       |       |
|-------------|--------|---------------------------------------------------------------------------------------|-------|
| 212558_at   | SPRY1  | sprouty homolog 1, antagonist of FGF signaling (Drosophila)                           | -1.9  |
| 212563_at   | BOP1   | block of proliferation 1                                                              | 0.69  |
| 212568_s_at | DLAT   | dihydrolipoamide S-acetyltransferase (E2 component of pyruvate dehydrogenase complex) | 1.31  |
| 212573_at   | ENDOD1 | endonuclease domain containing 1                                                      | -1.17 |
| 212576_at   | MGRN1  | mahogunin, ring finger 1                                                              | 1.04  |
| 212588_at   | PTPRC  | protein tyrosine phosphatase, receptor type, C                                        | -1.57 |

|             |         |                                                                                           |       |
|-------------|---------|-------------------------------------------------------------------------------------------|-------|
| 212592_at   | IGJ     | immunoglobulin J polypeptide, linker protein for immunoglobulin alpha and mu polypeptides | -3.35 |
| 212611_at   | DTX4    | deltex 4 homolog (Drosophila)                                                             | 1.51  |
| 212623_at   | TMEM41B | transmembrane protein 41B                                                                 | 1.32  |
| 212631_at   | STX7    | syntaxin 7                                                                                | -0.6  |
| 212642_s_at | HIVEP2  | human immunodeficiency virus type I enhancer binding protein 2                            | -1.09 |
| 212665_at   | TIPARP  | TCDD-inducible poly(ADP-ribose) polymerase                                                | -1.64 |

|             |          |                                                           |       |
|-------------|----------|-----------------------------------------------------------|-------|
| 212667_at   | SPARC    | secreted protein, acidic, cysteine-rich<br>(osteonectin)  | -1.63 |
| 212671_s_at | HLA-DQA1 | major histocompatibility complex,<br>class II, DQ alpha 1 | -2.62 |
| 212682_s_at | TMEM112B | transmembrane protein 112B                                | 0.64  |
| 212686_at   | PPM1H    | protein phosphatase 1H (PP2C<br>domain containing)        | 0.57  |
| 212699_at   | SCAMP5   | secretory carrier membrane protein 5                      | 0.56  |
| 212701_at   | TLN2     | talin 2                                                   | 0.64  |
| 212713_at   | MFAP4    | microfibrillar-associated protein 4                       | -1.55 |



|             |          |                                                                              |       |
|-------------|----------|------------------------------------------------------------------------------|-------|
| 212724_at   | RND3     | Rho family GTPase 3                                                          | -1.08 |
| 212739_s_at | NME4     | non-metastatic cells 4, protein expressed in                                 | 1.2   |
| 212786_at   | CLEC16A  | C-type lectin domain family 16, member A                                     | 0.82  |
| 212811_x_at | SLC1A4   | solute carrier family 1 (glutamate/neutral amino acid transporter), member 4 | 1.08  |
| 212829_at   | PIP4K2A  | phosphatidylinositol-5-phosphate 4-kinase, type II, alpha                    | -0.9  |
| 212835_at   | KIAA0157 | KIAA0157                                                                     | 0.68  |

|             |          |                                                                 |       |
|-------------|----------|-----------------------------------------------------------------|-------|
| 212865_s_at | COL14A1  | collagen, type XIV, alpha 1 (undulin)                           | -1.76 |
| 212871_at   | MAPKAPK5 | mitogen-activated protein kinase-<br>activated protein kinase 5 | 0.66  |
| 212882_at   | KLHL18   | kelch-like 18 (Drosophila)                                      | 0.43  |
| 212886_at   | CCDC69   | coiled-coil domain containing 69                                | 1.39  |
| 212890_at   | MGC15523 | hypothetical protein MGC15523                                   | 0.82  |
| 212907_at   | SLC30A1  | solute carrier family 30 (zinc<br>transporter), member 1        | 1.29  |

|             |         |                                                                     |       |
|-------------|---------|---------------------------------------------------------------------|-------|
| 212929_s_at | FAM21C  | family with sequence similarity 21,<br>member C                     | -1.04 |
| 212947_at   | SLC9A8  | solute carrier family 9<br>(sodium/hydrogen exchanger),<br>member 8 | 0.69  |
| 212958_x_at | PAM     | peptidylglycine alpha-amidating<br>monooxygenase                    | -1.09 |
| 212967_x_at | NAP1L1  | nucleosome assembly protein 1-like<br>1                             | -1.11 |
| 212993_at   |         | NA                                                                  | 1.89  |
| 212996_s_at | URB1    | URB1 ribosome biogenesis 1<br>homolog ( <i>S. cerevisiae</i> )      | 0.54  |
| 213004_at   | ANGPTL2 | angiopoietin-like 2                                                 | -0.58 |

|             |          |                                                                  |       |
|-------------|----------|------------------------------------------------------------------|-------|
| 213032_at   | NFIB     | nuclear factor I/B                                               | -1.28 |
| 213043_s_at | MED24    | mediator complex subunit 24                                      | 0.73  |
| 213052_at   | PRKAR2A  | protein kinase, cAMP-dependent,<br>regulatory, type II, alpha    | 1.02  |
| 213053_at   | KIAA0841 | KIAA0841                                                         | -0.7  |
| 213071_at   | DPT      | dermatopontin                                                    | -2.2  |
| 213079_at   | TSR2     | TSR2, 20S rRNA accumulation,<br>homolog ( <i>S. cerevisiae</i> ) | -0.75 |
| 213115_at   | ATG4A    | ATG4 autophagy related 4 homolog<br>A ( <i>S. cerevisiae</i> )   | 1.02  |

|             |        |                                                                                  |       |
|-------------|--------|----------------------------------------------------------------------------------|-------|
| 213144_at   | GOSR2  | golgi SNAP receptor complex<br>member 2                                          | 0.91  |
| 213180_s_at | GOSR2  | golgi SNAP receptor complex<br>member 2                                          | 0.72  |
| 213203_at   | SNAPC5 | small nuclear RNA activating<br>complex, polypeptide 5, 19kDa                    | 0.89  |
| 213215_at   |        | NA                                                                               | 0.77  |
| 213244_at   | SCAMP4 | secretory carrier membrane protein 4                                             | 0.68  |
| 213245_at   | ADCY1  | adenylate cyclase 1 (brain)                                                      | 1.05  |
| 213247_at   | SVEP1  | sushi, von Willebrand factor type A,<br>EGF and pentraxin domain<br>containing 1 | -1.08 |

|             |         |                                                        |       |
|-------------|---------|--------------------------------------------------------|-------|
| 213293_s_at | TRIM22  | tripartite motif-containing 22                         | -2.16 |
| 213323_s_at | ZC3H7B  | zinc finger CCCH-type containing<br>7B                 | 0.72  |
| 213325_at   | PVRL3   | poliovirus receptor-related 3                          | 1.35  |
| 213333_at   | MDH2    | malate dehydrogenase 2, NAD<br>(mitochondrial)         | 1.47  |
| 213353_at   | ABCA5   | ATP-binding cassette, sub-family A<br>(ABC1), member 5 | 1.24  |
| 213355_at   | ST3GAL6 | ST3 beta-galactoside alpha-2,3-<br>sialyltransferase 6 | 1.78  |
| 213393_at   |         | NA                                                     | 1.16  |
| 213429_at   |         | NA                                                     | -2.57 |

|             |          |                                                                                         |       |
|-------------|----------|-----------------------------------------------------------------------------------------|-------|
| 213502_x_at | LOC91316 | similar to bK246H3.1<br>(immunoglobulin lambda-like polypeptide 1, pre-B-cell specific) | -1.7  |
| 213503_x_at | ANXA2    | annexin A2                                                                              | -1.28 |
| 213504_at   | COPS6    | COP9 constitutive<br>photomorphogenic homolog subunit<br>6 (Arabidopsis)                | 0.94  |
| 213519_s_at | LAMA2    | laminin, alpha 2 (merosin, congenital muscular dystrophy)                               | -1.71 |
| 213564_x_at | LDHB     | lactate dehydrogenase B                                                                 | -2.5  |
| 213566_at   | RNASE6   | ribonuclease, RNase A family, k6                                                        | -1.5  |

|             |                  |                                             |       |
|-------------|------------------|---------------------------------------------|-------|
| 213607_x_at | NADK             | NAD kinase                                  | 0.82  |
| 213608_s_at | CTB-<br>1048E9.5 | similar to SRR1-like protein                | 0.74  |
| 213620_s_at | ICAM2            | intercellular adhesion molecule 2           | -0.87 |
| 213657_s_at | ZNF710           | zinc finger protein 710                     | 1.13  |
| 213658_at   | ZNF710           | zinc finger protein 710                     | 0.9   |
| 213740_s_at | ZFPL1            | zinc finger protein-like 1                  | -1.38 |
| 213750_at   | RSL1D1           | ribosomal L1 domain containing 1            | 0.98  |
| 213763_at   | HIPK2            | homeodomain interacting protein<br>kinase 2 | 1.18  |



|             |         |                                                            |       |
|-------------|---------|------------------------------------------------------------|-------|
| 213820_s_at | STARD5  | StAR-related lipid transfer (START)<br>domain containing 5 | 2.1   |
| 213835_x_at | GTPBP3  | GTP binding protein 3<br>(mitochondrial)                   | 0.46  |
| 213851_at   | TMEM110 | transmembrane protein 110                                  | 0.87  |
| 213864_s_at | NAP1L1  | nucleosome assembly protein 1-like<br>1                    | -1.08 |
| 213891_s_at | TCF4    | transcription factor 4                                     | -1.53 |
| 213905_x_at | BGN     | biglycan                                                   | -1.98 |
| 213929_at   |         | NA                                                         | 0.81  |
| 213940_s_at | FNBP1   | formin binding protein 1                                   | -0.95 |
| 213975_s_at | LYZ     | lysozyme (renal amyloidosis)                               | -2.41 |

|             |          |                                                                                                |       |
|-------------|----------|------------------------------------------------------------------------------------------------|-------|
| 214016_s_at | SFPQ     | splicing factor proline/glutamine-rich<br>(polypyrimidine tract binding protein<br>associated) | -1.27 |
| 214042_s_at | RPL22    | ribosomal protein L22                                                                          | -1.13 |
| 214095_at   | NDUFA4L2 | NADH dehydrogenase (ubiquinone)<br>1 alpha subcomplex, 4-like 2                                | 0.8   |
| 214096_s_at | NDUFA4L2 | NADH dehydrogenase (ubiquinone)<br>1 alpha subcomplex, 4-like 2                                | 0.98  |
| 214114_x_at | FASTK    | Fas-activated serine/threonine kinase                                                          | 0.9   |

|             |       |                                                                       |       |
|-------------|-------|-----------------------------------------------------------------------|-------|
| 214133_at   | MUC6  | mucin 6, oligomeric mucus/gel-forming                                 | -1.03 |
| 214156_at   | MYRIP | myosin VIIA and Rab interacting protein                               | 1.51  |
| 214158_s_at | FABP1 | fatty acid binding protein 1, liver                                   | 0.45  |
| 214214_s_at | C1QBP | complement component 1, q subcomponent binding protein                | 1.27  |
| 214233_at   | GGA2  | golgi associated, gamma adaptin ear containing, ARF binding protein 2 | 0.56  |
| 214247_s_at | DKK3  | dickkopf homolog 3 (Xenopus laevis)                                   | -2.95 |

|             |        |                                                   |       |
|-------------|--------|---------------------------------------------------|-------|
| 214268_s_at | MTMR4  | myotubularin related protein 4                    | 1.04  |
| 214386_at   | HMX1   | H6 family homeobox 1                              | -0.65 |
| 214402_s_at | SFI1   | Sfi1 homolog, spindle assembly associated (yeast) | -0.82 |
| 214408_s_at | RFPL3S | ret finger protein-like 3 antisense               | -0.48 |
| 214412_at   | H2AFB2 | H2A histone family, member B2                     | -0.41 |
| 214437_s_at | SHMT2  | serine hydroxymethyltransferase 2 (mitochondrial) | 0.91  |
| 214461_at   | LBP    | lipopolysaccharide binding protein                | 1.49  |
| 214465_at   | ORM2   | orosomuroid 2                                     | 0.8   |

|             |        |                                                                    |       |
|-------------|--------|--------------------------------------------------------------------|-------|
| 214545_s_at | PROSC  | proline synthetase co-transcribed<br>homolog (bacterial)           | 0.97  |
| 214584_x_at | ACACB  | acetyl-Coenzyme A carboxylase beta                                 | 0.61  |
| 214586_at   | GPR37  | G protein-coupled receptor 37<br>(endothelin receptor type B-like) | 0.77  |
| 214658_at   | TICAM2 | toll-like receptor adaptor molecule 2                              | 1.21  |
| 214669_x_at | IGKC   | immunoglobulin kappa constant                                      | -2.33 |
| 214677_x_at | IGLJ3  | immunoglobulin lambda joining 3                                    | -3.34 |

|             |        |                                                                                 |       |
|-------------|--------|---------------------------------------------------------------------------------|-------|
| 214708_at   | SNTB1  | syntrophin, beta 1 (dystrophin-associated protein A1, 59kDa, basic component 1) | 1.4   |
| 214713_at   | YLPM1  | YLP motif containing 1                                                          | 0.59  |
| 214714_at   | ZNF394 | zinc finger protein 394                                                         | -0.51 |
| 214733_s_at | YIPF1  | Yip1 domain family, member 1                                                    | 1.32  |
| 214769_at   |        | NA                                                                              | 0.46  |
| 214809_at   |        | NA                                                                              | -0.9  |
| 214813_at   | ZNF75  | zinc finger protein 75 (D8C6)                                                   | 0.43  |
| 214836_x_at | IGKC   | immunoglobulin kappa constant                                                   | -2.53 |

|             |         |                                                                           |       |
|-------------|---------|---------------------------------------------------------------------------|-------|
| 214849_at   | KCTD20  | potassium channel tetramerisation<br>domain containing 20                 | 0.91  |
| 214908_s_at | TRRAP   | transformation/transcription domain-<br>associated protein                | 0.49  |
| 214927_at   | ITGBL1  | integrin, beta-like 1 (with EGF-like<br>repeat domains)                   | -2.42 |
| 214941_s_at | PRPF40A | PRP40 pre-mRNA processing factor<br>40 homolog A ( <i>S. cerevisiae</i> ) | 0.84  |
| 215091_s_at | GTF3A   | general transcription factor IIIA                                         | 0.8   |
| 215121_x_at | IGL@    | immunoglobulin lambda locus                                               | -3.01 |

|             |          |                                                             |       |
|-------------|----------|-------------------------------------------------------------|-------|
| 215127_s_at | RBMS1    | RNA binding motif, single stranded<br>interacting protein 1 | -1.33 |
| 215139_at   | ARHGEF10 | Rho guanine nucleotide exchange<br>factor (GEF) 10          | -0.33 |
| 215176_x_at | NTN2L    | netrin 2-like (chicken)                                     | -3.05 |
| 215185_at   |          | NA                                                          | 0.58  |
| 215193_x_at | HLA-DRB1 | major histocompatibility complex,<br>class II, DR beta 1    | -2    |



|             |           |                                                   |       |
|-------------|-----------|---------------------------------------------------|-------|
|             |           |                                                   |       |
| 215207_x_at | LOC729148 | similar to lethal (2) k00619 CG4775-PA            | 0.81  |
| 215238_s_at | DOCK9     | dedicator of cytokinesis 9                        | -0.69 |
| 215261_at   | BTBD9     | BTB (POZ) domain containing 9                     | 0.88  |
| 215283_at   | LOC400642 | hypothetical gene supported by BC041875; BX648984 | 0.7   |
| 215325_x_at | C19orf26  | chromosome 19 open reading frame 26               | -1.1  |
| 215374_at   | PAPOLA    | poly(A) polymerase alpha                          | 0.58  |
| 215379_x_at | IGL@      | immunoglobulin lambda locus                       | -3.13 |

|             |       |                                                                                              |       |
|-------------|-------|----------------------------------------------------------------------------------------------|-------|
| 215404_x_at | FGFR1 | fibroblast growth factor receptor 1<br>(fms-related tyrosine kinase 2,<br>Pfeiffer syndrome) | -1.07 |
| 215445_x_at | 1-Mar | membrane-associated ring finger<br>(C3HC4) 1                                                 | -0.57 |
| 215540_at   | TRA@  | T cell receptor alpha locus                                                                  | 0.68  |
| 215544_s_at | UBOX5 | U-box domain containing 5                                                                    | 0.62  |

|             |         |                                                                                                   |      |
|-------------|---------|---------------------------------------------------------------------------------------------------|------|
| 215714_s_at | SMARCA4 | SWI/SNF related, matrix associated, actin dependent regulator of chromatin, subfamily a, member 4 | 0.83 |
| 215749_s_at | GORASP1 | golgi reassembly stacking protein 1, 65kDa                                                        | 0.86 |
| 215783_s_at | ALPL    | alkaline phosphatase, liver/bone/kidney                                                           | 1.69 |
| 215807_s_at | PLXNB1  | plexin B 1                                                                                        | 0.98 |
| 215833_s_at | SPPL2B  | signal peptide peptidase-like 2B                                                                  | 0.69 |

|             |             |                                                                                      |       |
|-------------|-------------|--------------------------------------------------------------------------------------|-------|
| 215931_s_at | ARFGEF2     | ADP-ribosylation factor guanine nucleotide-exchange factor 2 (brefeldin A-inhibited) | 0.4   |
| 215946_x_at | CTA-246H3.1 | similar to omega protein                                                             | -2.15 |
| 216083_s_at | NEU3        | sialidase 3 (membrane sialidase)                                                     | 0.56  |
| 216268_s_at | JAG1        | jagged 1 (Alagille syndrome)                                                         | -2.09 |
| 216302_at   | HNRNPC      | heterogeneous nuclear ribonucleoprotein C (C1/C2)                                    | 0.48  |
| 216326_s_at | HDAC3       | histone deacetylase 3                                                                | 0.63  |
| 216337_at   |             | NA                                                                                   | 0.38  |

|             |          |                                                                 |       |
|-------------|----------|-----------------------------------------------------------------|-------|
| 216360_x_at | RRP12    | ribosomal RNA processing 12<br>homolog ( <i>S. cerevisiae</i> ) | 0.53  |
| 216376_x_at |          | NA                                                              | 0.95  |
| 216379_x_at | CD24     | CD24 molecule                                                   | -2.15 |
| 216389_s_at | WDR23    | WD repeat domain 23                                             | 1.08  |
| 216401_x_at |          | NA                                                              | -2.39 |
| 216405_at   | LGALS1   | lectin, galactoside-binding, soluble, 1<br>(galectin 1)         | -1.17 |
| 216411_s_at | C15orf33 | chromosome 15 open reading frame<br>33                          | 0.36  |
| 216438_s_at | TMSB4X   | thymosin, beta 4, X-linked                                      | -0.74 |
| 216463_at   |          | NA                                                              | -0.33 |

|             |           |                                                        |       |
|-------------|-----------|--------------------------------------------------------|-------|
| 216466_at   | NAV3      | neuron navigator 3                                     | -0.2  |
| 216483_s_at | C19orf10  | chromosome 19 open reading frame<br>10                 | 1.05  |
| 216565_x_at | LOC391020 | interferon induced transmembrane<br>protein pseudogene | 0.92  |
| 216612_x_at |           | NA                                                     | -1.02 |
| 216640_s_at | PDIA6     | protein disulfide isomerase family A,<br>member 6      | 1.35  |
| 216684_s_at | SS18      | synovial sarcoma translocation,<br>chromosome 18       | -0.75 |
| 216689_x_at | ARHGAP1   | Rho GTPase activating protein 1                        | 0.88  |
| 216700_at   | TRIO      | triple functional domain (PTPRF<br>interacting)        | 0.5   |

|             |        |                                                                 |       |
|-------------|--------|-----------------------------------------------------------------|-------|
| 216834_at   | RGS1   | regulator of G-protein signaling 1                              | -4.23 |
| 216841_s_at | SOD2   | superoxide dismutase 2,<br>mitochondrial                        | 1.72  |
| 216844_at   | ZC3H7B | zinc finger CCCH-type containing<br>7B                          | -0.96 |
| 216894_x_at | CDKN1C | cyclin-dependent kinase inhibitor 1C<br>(p57, Kip2)             | -0.88 |
| 216909_at   | RRP12  | ribosomal RNA processing 12<br>homolog ( <i>S. cerevisiae</i> ) | 0.4   |
| 216914_at   | CDC25C | cell division cycle 25 homolog C ( <i>S.</i><br><i>pombe</i> )  | 0.55  |

|             |         |                                                         |       |
|-------------|---------|---------------------------------------------------------|-------|
| 217022_s_at | IGHA1   | immunoglobulin heavy constant<br>alpha 1                | -4.36 |
| 217028_at   | CXCR4   | chemokine (C-X-C motif) receptor 4                      | -4.23 |
| 217029_at   |         | NA                                                      | 0.51  |
| 217069_at   | MLL4    | myeloid/lymphoid or mixed-lineage<br>leukemia 4         | -1.26 |
| 217226_s_at | SFXN3   | sideroflexin 3                                          | -1.19 |
| 217298_at   | RPS14   | ribosomal protein S14                                   | 0.25  |
| 217338_at   | KRT19P2 | keratin 19 pseudogene 2                                 | 0.34  |
| 217423_at   |         | NA                                                      | 0.42  |
| 217458_at   |         | NA                                                      | 0.57  |
| 217478_s_at | HLA-DMA | major histocompatibility complex,<br>class II, DM alpha | -2.02 |



|             |           |                                                                    |       |
|-------------|-----------|--------------------------------------------------------------------|-------|
| 217496_s_at | IDE       | insulin-degrading enzyme                                           | 1.24  |
| 217499_x_at | OR7E38P   | olfactory receptor, family 7,<br>subfamily E, member 38 pseudogene | 1.2   |
| 217549_at   |           | NA                                                                 | -0.85 |
| 217551_at   | LOC441453 | similar to olfactory receptor, family<br>7, subfamily A, member 17 | 0.49  |
| 217598_at   | CINP      | cyclin-dependent kinase 2-interacting<br>protein                   | 0.34  |
| 217647_at   | HP        | haptoglobin                                                        | 1.84  |
| 217706_at   | LRRC51    | leucine rich repeat containing 51                                  | -1.21 |

|             |         |                                                        |       |
|-------------|---------|--------------------------------------------------------|-------|
| 217714_x_at | STMN1   | stathmin 1/oncoprotein 18                              | -1.04 |
| 217716_s_at | SEC61A1 | Sec61 alpha 1 subunit (S. cerevisiae)                  | 1.26  |
| 217727_x_at | VPS35   | vacuolar protein sorting 35 homolog<br>(S. cerevisiae) | -0.88 |
| 217728_at   | S100A6  | S100 calcium binding protein A6                        | -1.96 |
| 217733_s_at | TMSB10  | thymosin, beta 10                                      | -1.23 |
| 217749_at   | COPG    | coatamer protein complex, subunit<br>gamma             | 1.02  |
| 217762_s_at | RAB31   | RAB31, member RAS oncogene<br>family                   | -1.69 |
| 217763_s_at | RAB31   | RAB31, member RAS oncogene<br>family                   | -1.64 |

|             |        |                                                                                                |       |
|-------------|--------|------------------------------------------------------------------------------------------------|-------|
| 217764_s_at | RAB31  | RAB31, member RAS oncogene family                                                              | -1.38 |
| 217783_s_at | YPEL5  | yippee-like 5 (Drosophila)                                                                     | -0.82 |
| 217786_at   | PRMT5  | protein arginine methyltransferase 5                                                           | 0.78  |
| 217787_s_at | GALNT2 | UDP-N-acetyl-alpha-D-galactosamine:polypeptide N-acetylgalactosaminyltransferase 2 (GalNAc-T2) | 1.63  |
| 217788_s_at | GALNT2 | UDP-N-acetyl-alpha-D-galactosamine:polypeptide N-acetylgalactosaminyltransferase 2 (GalNAc-T2) | 1.51  |

|             |         |                                                                    |      |
|-------------|---------|--------------------------------------------------------------------|------|
| 217796_s_at | NPLOC4  | nuclear protein localization 4<br>homolog ( <i>S. cerevisiae</i> ) | 1.4  |
| 217808_s_at | MAPKAP1 | mitogen-activated protein kinase<br>associated protein 1           | 1.18 |
| 217825_s_at | UBE2J1  | ubiquitin-conjugating enzyme E2, J1<br>(UBC6 homolog, yeast)       | 1.04 |
| 217837_s_at | VPS24   | vacuolar protein sorting 24 homolog<br>( <i>S. cerevisiae</i> )    | -1.1 |
| 217855_x_at | SDF4    | stromal cell derived factor 4                                      | 0.71 |

|             |          |                                                                          |       |
|-------------|----------|--------------------------------------------------------------------------|-------|
| 217871_s_at | MIF      | macrophage migration inhibitory factor (glycosylation-inhibiting factor) | 1.3   |
| 217891_at   | C16orf58 | chromosome 16 open reading frame 58                                      | 0.87  |
| 217895_at   | PTCD3    | Pentatricopeptide repeat domain 3                                        | 0.76  |
| 217897_at   | FXVD6    | FXVD domain containing ion transport regulator 6                         | -1.02 |
| 217921_at   | MAN1A2   | mannosidase, alpha, class 1A, member 2                                   | 1.12  |
| 217922_at   | MAN1A2   | mannosidase, alpha, class 1A, member 2                                   | 0.74  |

|             |           |                                                                                |      |
|-------------|-----------|--------------------------------------------------------------------------------|------|
| 217924_at   | C6orf106  | chromosome 6 open reading frame<br>106                                         | 0.88 |
| 217929_s_at | KIAA0319L | KIAA0319-like                                                                  | 0.64 |
| 217935_s_at | UQCC      | ubiquinol-cytochrome c reductase<br>complex chaperone, CBP3 homolog<br>(yeast) | 0.68 |
| 217944_at   | POMGNT1   | protein O-linked mannose beta1,2-N-<br>acetylglucosaminyltransferase           | 1.2  |
| 217960_s_at | TOMM22    | translocase of outer mitochondrial<br>membrane 22 homolog (yeast)              | 0.57 |

|             |         |                                                                 |       |
|-------------|---------|-----------------------------------------------------------------|-------|
| 217963_s_at | NGFRAP1 | nerve growth factor receptor<br>(TNFRSF16) associated protein 1 | -1.2  |
| 217966_s_at | FAM129A | family with sequence similarity 129,<br>member A                | -1.22 |
| 217977_at   | SEPX1   | selenoprotein X, 1                                              | 0.8   |
| 217984_at   | RNASET2 | ribonuclease T2                                                 | -1.11 |
| 218019_s_at | PDXK    | pyridoxal (pyridoxine, vitamin B6)<br>kinase                    | 1.25  |
| 218022_at   | VRK3    | vaccinia related kinase 3                                       | 0.63  |
| 218073_s_at | TMEM48  | transmembrane protein 48                                        | 0.53  |
| 218077_s_at | ZDHHC3  | zinc finger, DHHC-type containing 3                             | 0.58  |

|             |          |                                                    |       |
|-------------|----------|----------------------------------------------------|-------|
| 218088_s_at | RRAGC    | Ras-related GTP binding C                          | -0.83 |
| 218105_s_at | MRPL4    | mitochondrial ribosomal protein L4                 | 1.06  |
| 218126_at   | FAM82C   | family with sequence similarity 82,<br>member C    | 0.88  |
| 218130_at   | C17orf62 | chromosome 17 open reading frame<br>62             | 1.29  |
| 218140_x_at | SRPRB    | signal recognition particle receptor, B<br>subunit | 1.19  |
| 218145_at   | TRIB3    | tribbles homolog 3 (Drosophila)                    | 1.4   |
| 218162_at   | OLFML3   | olfactomedin-like 3                                | -1.43 |



|             |         |                                                            |       |
|-------------|---------|------------------------------------------------------------|-------|
| 218168_s_at | CABC1   | chaperone, ABC1 activity of bc1 complex homolog (S. pombe) | 1.25  |
| 218172_s_at | DERL1   | Der1-like domain family, member 1                          | 0.98  |
| 218189_s_at | NANS    | N-acetylneuraminic acid synthase (sialic acid synthase)    | 1.31  |
| 218212_s_at | MOCS2   | molybdenum cofactor synthesis 2                            | 1.1   |
| 218248_at   | FAM111A | family with sequence similarity 111, member A              | -0.88 |
| 218254_s_at | SAR1B   | SAR1 gene homolog B (S. cerevisiae)                        | 1.12  |

|             |          |                                                                    |      |
|-------------|----------|--------------------------------------------------------------------|------|
| 218289_s_at | UBE1DC1  | ubiquitin-activating enzyme E1-<br>domain containing 1             | 1.26 |
| 218296_x_at | MSTO1    | misato homolog 1 (Drosophila)                                      | 0.99 |
| 218300_at   | C16orf53 | chromosome 16 open reading frame<br>53                             | 0.58 |
| 218347_at   | TYW1     | tRNA-yW synthesizing protein 1<br>homolog ( <i>S. cerevisiae</i> ) | 0.61 |
| 218358_at   | CRELD2   | cysteine-rich with EGF-like domains<br>2                           | 1.42 |
| 218377_s_at | RWDD2B   | RWD domain containing 2B                                           | 1.1  |
| 218387_s_at | PGLS     | 6-phosphogluconolactonase                                          | 0.95 |

|             |          |                                                            |      |
|-------------|----------|------------------------------------------------------------|------|
| 218391_at   | SNF8     | SNF8, ESCRT-II complex subunit,<br>homolog (S. cerevisiae) | 0.96 |
| 218427_at   | SDCCAG3  | serologically defined colon cancer<br>antigen 3            | 0.95 |
| 218429_s_at | FLJ11286 | hypothetical protein FLJ11286                              | 0.78 |
| 218433_at   | PANK3    | pantothenate kinase 3                                      | 0.6  |
| 218441_s_at | RPAP1    | RNA polymerase II associated<br>protein 1                  | 0.6  |
| 218465_at   | TMEM33   | transmembrane protein 33                                   | 1.09 |
| 218481_at   | EXOSC5   | exosome component 5                                        | 0.56 |

|             |         |                                                                        |       |
|-------------|---------|------------------------------------------------------------------------|-------|
| 218488_at   | EIF2B3  | eukaryotic translation initiation factor<br>2B, subunit 3 gamma, 58kDa | 0.75  |
| 218500_at   | C8orf55 | chromosome 8 open reading frame<br>55                                  | 0.79  |
| 218516_s_at | IMPAD1  | inositol monophosphatase domain<br>containing 1                        | 0.84  |
| 218517_at   | PHF17   | PHD finger protein 17                                                  | -1.47 |
| 218540_at   | THTPA   | thiamine triphosphatase                                                | 0.7   |
| 218581_at   | ABHD4   | abhydrolase domain containing 4                                        | 0.69  |
| 218596_at   | TBC1D13 | TBC1 domain family, member 13                                          | 0.7   |

|             |         |                                                                    |       |
|-------------|---------|--------------------------------------------------------------------|-------|
| 218603_at   | HECA    | headcase homolog (Drosophila)                                      | -1.04 |
| 218620_s_at | HEMK1   | HemK methyltransferase family member 1                             | 0.51  |
| 218656_s_at | LHFP    | lipoma HMGIC fusion partner                                        | -1.96 |
| 218660_at   | DYSF    | dysferlin, limb girdle muscular dystrophy 2B (autosomal recessive) | 0.8   |
| 218666_s_at | STX17   | syntaxin 17                                                        | 0.79  |
| 218677_at   | S100A14 | S100 calcium binding protein A14                                   | -1.22 |
| 218681_s_at | SDF2L1  | stromal cell-derived factor 2-like 1                               | 1.97  |
| 218689_at   | FANCF   | Fanconi anemia, complementation                                    | 0.65  |

|             |          |                                                                               |       |
|-------------|----------|-------------------------------------------------------------------------------|-------|
|             |          | group F                                                                       |       |
| 218695_at   | EXOSC4   | exosome component 4                                                           | 0.58  |
| 218723_s_at | C13orf15 | chromosome 13 open reading frame<br>15                                        | -3.07 |
| 218731_s_at | VWA1     | von Willebrand factor A domain<br>containing 1                                | 0.95  |
| 218745_x_at | TMEM161A | transmembrane protein 161A                                                    | 0.64  |
| 218749_s_at | SLC24A6  | solute carrier family 24<br>(sodium/potassium/calcium<br>exchanger), member 6 | 0.78  |

|             |           |                                                                     |       |
|-------------|-----------|---------------------------------------------------------------------|-------|
| 218753_at   | XKR8      | XK, Kell blood group complex subunit-related family, member 8       | 0.84  |
| 218772_x_at | TMEM38B   | transmembrane protein 38B                                           | 1.33  |
| 218795_at   | ACP6      | acid phosphatase 6, lysophosphatidic                                | 0.87  |
| 218817_at   | SPCS3     | signal peptidase complex subunit 3 homolog ( <i>S. cerevisiae</i> ) | 1.25  |
| 218820_at   | C14orf132 | chromosome 14 open reading frame 132                                | 0.87  |
| 218840_s_at | NADSYN1   | NAD synthetase 1                                                    | -1.11 |

|           |          |                                                          |       |
|-----------|----------|----------------------------------------------------------|-------|
| 218843_at | FNDC4    | fibronectin type III domain<br>containing 4              | 1.11  |
| 218856_at | TNFRSF21 | tumor necrosis factor receptor<br>superfamily, member 21 | -2.07 |
| 218870_at | ARHGAP15 | Rho GTPase activating protein 15                         | -1.18 |
| 218872_at | TESC     | tescalcin                                                | -1.11 |
| 218887_at | MRPL2    | mitochondrial ribosomal protein L2                       | 0.73  |
| 218915_at | NF2      | neurofibromin 2 (bilateral acoustic<br>neuroma)          | 0.7   |
| 218923_at | CTBS     | chitobiase, di-N-acetyl-                                 | 1.39  |
| 218937_at | ZNF434   | zinc finger protein 434                                  | 0.65  |



|             |         |                                                            |       |
|-------------|---------|------------------------------------------------------------|-------|
| 218949_s_at | QRSL1   | glutaminyl-tRNA synthase<br>(glutamine-hydrolyzing)-like 1 | 0.74  |
| 218963_s_at | KRT23   | keratin 23 (histone deacetylase<br>inducible)              | -2.83 |
| 218976_at   | DNAJC12 | DnaJ (Hsp40) homolog, subfamily C,<br>member 12            | 1.99  |
| 218981_at   | ACN9    | ACN9 homolog ( <i>S. cerevisiae</i> )                      | 1.32  |
| 218989_x_at | SLC30A5 | solute carrier family 30 (zinc<br>transporter), member 5   | 1.42  |
| 219003_s_at | MANEA   | mannosidase, endo-alpha                                    | 1.58  |

|             |           |                                              |       |
|-------------|-----------|----------------------------------------------|-------|
| 219017_at   | ETNK1     | ethanolamine kinase 1                        | 1.47  |
| 219071_x_at | C8orf30A  | chromosome 8 open reading frame<br>30A       | 0.64  |
| 219086_at   | C14orf131 | chromosome 14 open reading frame<br>131      | 0.35  |
| 219087_at   | ASPN      | asporin                                      | -2.47 |
| 219108_x_at | DDX27     | DEAD (Asp-Glu-Ala-Asp) box<br>polypeptide 27 | -0.76 |
| 219162_s_at | MRPL11    | mitochondrial ribosomal protein L11          | 0.69  |
| 219181_at   | LIPG      | lipase, endothelial                          | 1.56  |
| 219200_at   | FASTKD3   | FAST kinase domains 3                        | 1.12  |

|             |         |                                                                                                                  |       |
|-------------|---------|------------------------------------------------------------------------------------------------------------------|-------|
| 219259_at   | SEMA4A  | sema domain, immunoglobulin domain (Ig), transmembrane domain (TM) and short cytoplasmic domain, (semaphorin) 4A | 0.92  |
| 219261_at   | C7orf26 | chromosome 7 open reading frame 26                                                                               | 0.75  |
| 219295_s_at | PCOLCE2 | procollagen C-endopeptidase enhancer 2                                                                           | 1.21  |
| 219304_s_at | PDGFD   | platelet derived growth factor D                                                                                 | -2.41 |
| 219344_at   | SLC29A3 | solute carrier family 29 (nucleoside transporters), member 3                                                     | 0.63  |

|             |         |                                            |       |
|-------------|---------|--------------------------------------------|-------|
| 219359_at   | ATHL1   | ATH1, acid trehalase-like 1 (yeast)        | -1.03 |
| 219366_at   | AVEN    | apoptosis, caspase activation<br>inhibitor | 0.7   |
| 219380_x_at | POLH    | polymerase (DNA directed), eta             | -1.41 |
| 219386_s_at | SLAMF8  | SLAM family member 8                       | -1.16 |
| 219405_at   | TRIM68  | tripartite motif-containing 68             | 0.72  |
| 219428_s_at | PXMP4   | peroxisomal membrane protein 4,<br>24kDa   | 0.68  |
| 219450_at   | C4orf19 | chromosome 4 open reading frame<br>19      | 1.31  |
| 219462_at   | TMEM53  | transmembrane protein 53                   | 0.72  |

|             |           |                                                                  |       |
|-------------|-----------|------------------------------------------------------------------|-------|
| 219499_at   | SEC61A2   | Sec61 alpha 2 subunit ( <i>S. cerevisiae</i> )                   | 0.87  |
| 219526_at   | C14orf169 | chromosome 14 open reading frame<br>169                          | 0.93  |
| 219545_at   | KCTD14    | potassium channel tetramerisation<br>domain containing 14        | 1.28  |
| 219564_at   | KCNJ16    | potassium inwardly-rectifying<br>channel, subfamily J, member 16 | -4.06 |
| 219572_at   | CADPS2    | Ca <sup>2+</sup> -dependent activator protein for<br>secretion 2 | 1.04  |
| 219612_s_at | FGG       | fibrinogen gamma chain                                           | 0.67  |

|             |          |                                                     |       |
|-------------|----------|-----------------------------------------------------|-------|
| 219630_at   | PDZK1IP1 | PDZK1 interacting protein 1                         | -2.86 |
| 219640_at   | CLDN15   | claudin 15                                          | 0.78  |
| 219682_s_at | TBX3     | T-box 3 (ulnar mammary syndrome)                    | 1.6   |
| 219690_at   | TMEM149  | transmembrane protein 149                           | 1.28  |
| 219718_at   | FLJ10986 | hypothetical protein FLJ10986                       | 1.22  |
| 219756_s_at | POF1B    | premature ovarian failure, 1B                       | -0.79 |
| 219771_at   | TBC1D8B  | TBC1 domain family, member 8B<br>(with GRAM domain) | 1.34  |
| 219835_at   | PRDM8    | PR domain containing 8                              | -0.79 |
| 219854_at   | ZNF14    | zinc finger protein 14                              | -0.66 |

|             |          |                                                 |      |
|-------------|----------|-------------------------------------------------|------|
| 219873_at   | COLEC11  | collectin sub-family member 11                  | -1.6 |
| 219910_at   | HYPE     | Huntingtin interacting protein E                | 1.4  |
| 219920_s_at | GMPPB    | GDP-mannose pyrophosphorylase B                 | 1.66 |
| 219943_s_at | FLJ11850 | hypothetical protein FLJ11850                   | 0.53 |
| 219959_at   | MOCOS    | molybdenum cofactor sulfurase                   | 1.93 |
| 219960_s_at | UCHL5    | ubiquitin carboxyl-terminal<br>hydrolase L5     | 1.65 |
| 219992_at   | TAC3     | tachykinin 3 (neuromedin K,<br>neurokinin beta) | 0.7  |

|             |         |                                                                                        |      |
|-------------|---------|----------------------------------------------------------------------------------------|------|
| 219994_at   | APBB1IP | amyloid beta (A4) precursor protein-binding, family B, member 1<br>interacting protein | 0.8  |
| 220012_at   | ERO1LB  | ERO1-like beta ( <i>S. cerevisiae</i> )                                                | 1.09 |
| 220028_at   | ACVR2B  | activin A receptor, type IIB                                                           | 0.83 |
| 220041_at   | PIGZ    | phosphatidylinositol glycan anchor<br>biosynthesis, class Z                            | 0.58 |
| 220070_at   | JMJD5   | jumonji domain containing 5                                                            | 1.06 |
| 220094_s_at | CCDC90A | coiled-coil domain containing 90A                                                      | 1.06 |
| 220095_at   | C9orf39 | chromosome 9 open reading frame<br>39                                                  | 0.44 |



|             |          |                                                       |       |
|-------------|----------|-------------------------------------------------------|-------|
| 220112_at   | ANKRD55  | ankyrin repeat domain 55                              | 0.66  |
| 220180_at   | CCDC68   | coiled-coil domain containing 68                      | -1.19 |
| 220181_x_at | SLC30A5  | solute carrier family 30 (zinc transporter), member 5 | 0.56  |
| 220216_at   | C8orf44  | chromosome 8 open reading frame 44                    | -0.59 |
| 220235_s_at | C1orf103 | chromosome 1 open reading frame 103                   | 1.66  |
| 220251_at   | C1orf107 | chromosome 1 open reading frame 107                   | 0.67  |
| 220256_s_at | OXCT2    | 3-oxoacid CoA transferase 2                           | -0.6  |

|             |        |                                                                                      |       |
|-------------|--------|--------------------------------------------------------------------------------------|-------|
| 220261_s_at | ZDHHC4 | zinc finger, DHHC-type containing 4                                                  | 0.79  |
| 220271_x_at | EFCAB6 | EF-hand calcium binding domain 6                                                     | 0.45  |
| 220275_at   | CUZD1  | CUB and zona pellucida-like domains 1                                                | 0.32  |
| 220319_s_at | MYLIP  | myosin regulatory light chain interacting protein                                    | -0.76 |
| 220325_at   | TAF7L  | TAF7-like RNA polymerase II, TATA box binding protein (TBP)-associated factor, 50kDa | 0.4   |

|             |         |                                                                        |       |
|-------------|---------|------------------------------------------------------------------------|-------|
| 220346_at   | MTHFD2L | methylenetetrahydrofolate<br>dehydrogenase (NADP+ dependent)<br>2-like | 0.73  |
| 220353_at   | FAM86C  | family with sequence similarity 86,<br>member C                        | 0.39  |
| 220404_at   | GPR97   | G protein-coupled receptor 97                                          | 0.41  |
| 220446_s_at | CHST4   | carbohydrate (N-acetylglucosamine<br>6-O) sulfotransferase 4           | -1.87 |
| 220449_at   | MGC5566 | hypothetical protein MGC5566                                           | 0.46  |
| 220483_s_at | RNF19A  | ring finger protein 19A                                                | -1.08 |
| 220489_s_at |         | NA                                                                     | -1.08 |

|             |          |                                        |       |
|-------------|----------|----------------------------------------|-------|
| 220587_s_at | GBL      | G protein beta subunit-like            | 0.67  |
| 220643_s_at | FAIM     | Fas apoptotic inhibitory molecule      | -1.38 |
| 220674_at   | FLJ22814 | hypothetical protein FLJ22814          | -0.56 |
| 220755_s_at | C6orf48  | chromosome 6 open reading frame<br>48  | -1.22 |
| 220773_s_at | GPHN     | gephyrin                               | 1.11  |
| 220904_at   | C6orf208 | chromosome 6 open reading frame<br>208 | 0.53  |
| 220964_s_at | RAB1B    | RAB1B, member RAS oncogene<br>family   | 0.94  |
| 220974_x_at | SFXN3    | sideroflexin 3                         | -0.8  |

|             |         |                                                                      |       |
|-------------|---------|----------------------------------------------------------------------|-------|
| 221024_s_at | SLC2A10 | solute carrier family 2 (facilitated glucose transporter), member 10 | 2.04  |
| 221031_s_at | APOLD1  | apolipoprotein L domain containing 1                                 | -2.89 |
| 221041_s_at | SLC17A5 | solute carrier family 17 (anion/sugar transporter), member 5         | 0.81  |
| 221063_x_at | RNF123  | ring finger protein 123                                              | 0.92  |
| 221079_s_at | METTL2B | methyltransferase like 2B                                            | 0.9   |
| 221127_s_at | RIG     | regulated in glioma                                                  | -0.78 |
| 221159_at   |         | NA                                                                   | 2.61  |

|             |         |                                                         |       |
|-------------|---------|---------------------------------------------------------|-------|
| 221247_s_at | WBSCR16 | Williams-Beuren syndrome<br>chromosome region 16        | 0.53  |
| 221261_x_at | MAGED4B | melanoma antigen family D, 4B                           | -0.54 |
| 221268_s_at | SGPP1   | sphingosine-1-phosphate phosphatase<br>1                | 1.54  |
| 221306_at   | GPR27   | G protein-coupled receptor 27                           | 0.62  |
| 221341_s_at | OR1D4   | olfactory receptor, family 1,<br>subfamily D, member 4  | 0.29  |
| 221346_at   | OR10J1  | olfactory receptor, family 10,<br>subfamily J, member 1 | 0.36  |

|             |          |                                                                  |       |
|-------------|----------|------------------------------------------------------------------|-------|
| 221478_at   | BNIP3L   | BCL2/adenovirus E1B 19kDa<br>interacting protein 3-like          | -1.34 |
| 221524_s_at | RRAGD    | Ras-related GTP binding D                                        | 1.05  |
| 221539_at   | EIF4EBP1 | eukaryotic translation initiation factor<br>4E binding protein 1 | 1.14  |
| 221541_at   | CRISPLD2 | cysteine-rich secretory protein LCCL<br>domain containing 2      | -1.98 |
| 221575_at   | SCLY     | selenocysteine lyase                                             | 1.83  |
| 221614_s_at | RPH3AL   | rabphilin 3A-like (without C2<br>domains)                        | 0.91  |

|             |          |                                         |       |
|-------------|----------|-----------------------------------------|-------|
| 221629_x_at | C8orf30A | chromosome 8 open reading frame<br>30A  | 0.64  |
| 221645_s_at | ZNF83    | zinc finger protein 83                  | -1.6  |
| 221651_x_at | IGKC     | immunoglobulin kappa constant           | -2.56 |
| 221671_x_at | IGKC     | immunoglobulin kappa constant           | -2.54 |
| 221693_s_at | MRPS18A  | mitochondrial ribosomal protein<br>S18A | 1.07  |
| 221711_s_at | C19orf62 | chromosome 19 open reading frame<br>62  | 0.63  |
| 221718_s_at | AKAP13   | A kinase (PRKA) anchor protein 13       | -1.32 |



|             |        |                                                    |       |
|-------------|--------|----------------------------------------------------|-------|
| 221731_x_at | VCAN   | versican                                           | -2.75 |
| 221767_x_at | HDLBP  | high density lipoprotein binding protein (vigilin) | 0.68  |
| 221770_at   | RPE    | ribulose-5-phosphate-3-epimerase                   | 0.61  |
| 221810_at   | RAB15  | RAB15, member RAS oncogene family                  | 1.14  |
| 221838_at   | KLHL22 | kelch-like 22 (Drosophila)                         | 0.38  |
| 221845_s_at | CLPB   | ClpB caseinolytic peptidase B homolog (E. coli)    | 0.65  |
| 221853_s_at | NOMO3  | NODAL modulator 3                                  | 1.52  |
| 221867_at   | N4BP1  | Nedd4 binding protein 1                            | 0.68  |

|             |        |                                                               |       |
|-------------|--------|---------------------------------------------------------------|-------|
| 221868_at   | PAIP2B | poly(A) binding protein interacting<br>protein 2B             | 1.11  |
| 221877_at   |        | NA                                                            | 0.66  |
| 221882_s_at | TMEM8  | transmembrane protein 8 (five<br>membrane-spanning domains)   | 0.9   |
| 221892_at   | H6PD   | hexose-6-phosphate dehydrogenase<br>(glucose 1-dehydrogenase) | 1.17  |
| 221899_at   | PFAAP5 | phosphonoformate immuno-<br>associated protein 5              | -1.39 |
| 221906_at   | TXNRD3 | thioredoxin reductase 3                                       | 0.77  |

|             |        |                                                  |       |
|-------------|--------|--------------------------------------------------|-------|
| 221940_at   | RPUSD2 | RNA pseudouridylate synthase domain containing 2 | 0.51  |
| 221951_at   | TMEM80 | transmembrane protein 80                         | -0.85 |
| 221957_at   | PDK3   | pyruvate dehydrogenase kinase, isozyme 3         | 0.65  |
| 221966_at   | GPR137 | G protein-coupled receptor 137                   | 0.76  |
| 221972_s_at | SDF4   | stromal cell derived factor 4                    | 1.19  |
| 222013_x_at | FAM86A | family with sequence similarity 86, member A     | 0.69  |
| 222024_s_at | AKAP13 | A kinase (PRKA) anchor protein 13                | -1.35 |

|             |         |                                                                              |       |
|-------------|---------|------------------------------------------------------------------------------|-------|
| 222034_at   | GNB2L1  | guanine nucleotide binding protein<br>(G protein), beta polypeptide 2-like 1 | -0.71 |
| 222073_at   | COL4A3  | collagen, type IV, alpha 3<br>(Goodpasture antigen)                          | -1.59 |
| 222116_s_at | TBC1D16 | TBC1 domain family, member 16                                                | 1.04  |
| 222126_at   | HRBL    | HIV-1 Rev binding protein-like                                               | 1.37  |
| 222146_s_at | TCF4    | transcription factor 4                                                       | -1.89 |
| 222156_x_at | CCPG1   | cell cycle progression 1                                                     | 1.19  |
| 222192_s_at | C2orf43 | chromosome 2 open reading frame<br>43                                        | 0.9   |

|             |          |                                                                        |       |
|-------------|----------|------------------------------------------------------------------------|-------|
| 222206_s_at | NCLN     | nicalin homolog (zebrafish)                                            | 0.75  |
| 222212_s_at | LASS2    | LAG1 homolog, ceramide synthase 2                                      | 0.83  |
| 222231_s_at | LRRC59   | leucine rich repeat containing 59                                      | 1.28  |
| 222244_s_at | TUG1     | taurine upregulated gene 1                                             | -1.13 |
| 222250_s_at | INTS7    | integrator complex subunit 7                                           | 0.98  |
| 222263_at   | SLC35E1  | solute carrier family 35, member E1                                    | 0.7   |
| 222277_at   | PCOTH    | prostate collagen triple helix                                         | 0.67  |
| 222327_x_at | OR7E156P | olfactory receptor, family 7,<br>subfamily E, member 156<br>pseudogene | 0.58  |

|             |           |                                                                                                      |      |
|-------------|-----------|------------------------------------------------------------------------------------------------------|------|
| 222335_at   |           | NA                                                                                                   | 0.28 |
| 222338_x_at | LOC646808 | hypothetical LOC646808                                                                               | 0.59 |
| 222352_at   | FBXO31    | F-box protein 31                                                                                     | 0.56 |
| 31846_at    | RHOD      | ras homolog gene family, member D                                                                    | 1.3  |
| 31861_at    | IGHMBP2   | immunoglobulin mu binding protein<br>2                                                               | 0.66 |
| 32209_at    | FAM89B    | family with sequence similarity 89,<br>member B                                                      | 0.57 |
| 32836_at    | AGPAT1    | 1-acylglycerol-3-phosphate O-<br>acyltransferase 1 (lysophosphatidic<br>acid acyltransferase, alpha) | 0.74 |

|            |        |                                                                                   |       |
|------------|--------|-----------------------------------------------------------------------------------|-------|
| 33579_i_at | GALR3  | galanin receptor 3                                                                | 0.68  |
| 33814_at   | PAK4   | p21(CDKN1A)-activated kinase 4                                                    | 0.57  |
| 34210_at   | CD52   | CD52 molecule                                                                     | -1.55 |
| 34260_at   | TELO2  | TEL2, telomere maintenance 2,<br>homolog ( <i>S. cerevisiae</i> )                 | -0.75 |
| 36004_at   | IKBKG  | inhibitor of kappa light polypeptide<br>gene enhancer in B-cells, kinase<br>gamma | 0.69  |
| 37384_at   | PPM1F  | protein phosphatase 1F (PP2C<br>domain containing)                                | 0.55  |
| 37590_g_at | ZNF710 | zinc finger protein 710                                                           | 0.98  |

|          |        |                                                  |      |
|----------|--------|--------------------------------------------------|------|
| 38703_at | DNPEP  | aspartyl aminopeptidase                          | 0.5  |
| 39549_at | NPAS2  | neuronal PAS domain protein 2                    | 1.27 |
| 39835_at | SBF1   | SET binding factor 1                             | 0.51 |
| 39891_at | ZNF710 | zinc finger protein 710                          | 0.4  |
| 40255_at | DDX28  | DEAD (Asp-Glu-Ala-Asp) box<br>polypeptide 28     | 0.53 |
| 40359_at | RASSF7 | Ras association (RalGDS/AF-6)<br>domain family 7 | 0.68 |
| 41160_at | MBD3   | methyl-CpG binding domain protein<br>3           | 0.88 |



|            |              |                                                                 |       |
|------------|--------------|-----------------------------------------------------------------|-------|
| 44617_at   | OGFOD2       | 2-oxoglutarate and iron-dependent oxygenase domain containing 2 | 1.15  |
| 45526_g_at | FLJ14154     | hypothetical protein FLJ14154                                   | 0.75  |
| 45714_at   | HCFC1R1      | host cell factor C1 regulator 1 (XPO1 dependent)                | -0.74 |
| 47069_at   | PRR5         | proline rich 5 (renal)                                          | 0.73  |
| 47083_at   | C7orf26      | chromosome 7 open reading frame 26                              | 0.6   |
| 48659_at   | RP5-1077B9.4 | invasion inhibitory protein 45                                  | 0.8   |

|          |          |                                                                                 |      |
|----------|----------|---------------------------------------------------------------------------------|------|
| 49327_at | SIRT3    | sirtuin (silent mating type information regulation 2 homolog) 3 (S. cerevisiae) | 0.55 |
| 49878_at | PEX16    | peroxisomal biogenesis factor 16                                                | 0.51 |
| 52005_at | WIZ      | widely interspaced zinc finger motifs                                           | 0.7  |
| 52078_at | C1orf160 | chromosome 1 open reading frame 160                                             | 0.6  |
| 53968_at | INTS5    | integrator complex subunit 5                                                    | 0.96 |
| 54632_at | THADA    | thyroid adenoma associated                                                      | 1.66 |
| 55093_at | CSGlcA-T | chondroitin sulfate glucuronyltransferase                                       | 1    |

|          |         |                                                                      |      |
|----------|---------|----------------------------------------------------------------------|------|
| 55872_at | ZNF512B | zinc finger protein 512B                                             | 1.11 |
| 56829_at | NIBP    | NIK and IKK{beta} binding protein                                    | 0.61 |
| 57082_at | LDLRAP1 | low density lipoprotein receptor<br>adaptor protein 1                | 0.6  |
| 58916_at | NDUFC2  | NADH dehydrogenase (ubiquinone)<br>1, subcomplex unknown, 2, 14.5kDa | 1.52 |
| 59631_at | TXNRD3  | thioredoxin reductase 3                                              | 0.5  |
| 59697_at | RAB15   | RAB15, member RAS oncogene<br>family                                 | 1.38 |

|          |         |                                                  |      |
|----------|---------|--------------------------------------------------|------|
| 60528_at | PLA2G4B | phospholipase A2, group IVB<br>(cytosolic)       | 0.82 |
| 61874_at | C9orf7  | chromosome 9 open reading frame 7                | 0.73 |
| 64486_at | CORO1B  | coronin, actin binding protein, 1B               | 1.14 |
| 65086_at | YIPF2   | Yip1 domain family, member 2                     | 0.78 |
| 65521_at | UBE2D4  | ubiquitin-conjugating enzyme E2D 4<br>(putative) | 0.51 |
| 79005_at | SLC35E1 | solute carrier family 35, member E1              | 0.4  |
